# Supplementary material for: Facile oxidation of electron-poor benzo[b]thiophenes to the corresponding sulfones with an aqueous solution of H2O2 and P2O5
Source: Royal Society of Chemistry journal article supplement (doi:10.1039/b924333j), 2010-01-01
Supplement: b924333j.pdf [file b924333j.pdf]

**Facile oxidation of electron-poor benzo[*b*]thiophenes to the corresponding sulfones with an aqueous solution of H<sub>2</sub>O<sub>2</sub> and P<sub>2</sub>O<sub>5</sub>**

**Dyeison Antonow,<sup>a</sup> Teresa Marrafa,<sup>a</sup> Irfaan Dawood,<sup>a</sup> Tauheed Ahmed,<sup>a</sup> Mohammad R. Haque,<sup>a</sup> David E. Thurston<sup>a</sup> and Giovanna Zinzalla<sup>\*a</sup>**

<sup>a</sup> Cancer Research UK Protein-Protein Interactions Drug Discovery Research Group, The School of Pharmacy, University of London, 29/39 Brunswick Square, London, United Kingdom. Fax: +44 (0)207753 5964; Tel: +44(0)207 7753 5932; E-mail: giovanna.zinzalla@pharmacy.ac.uk

**Table of Contents**

|                                                                    |           |
|--------------------------------------------------------------------|-----------|
| <b>Synthesis of the benzo[<i>b</i>]thiophenecarboxamides .....</b> | <b>2</b>  |
| <b>Synthesis of sulfur-containing substrates .....</b>             | <b>8</b>  |
| <b>Syntheses of benzo[<i>b</i>]thiophene 1,1-dioxides.....</b>     | <b>9</b>  |
| <b>Analytical data for the oxidized products.....</b>              | <b>11</b> |
| <b>References.....</b>                                             | <b>17</b> |
| <b>NMR spectra for all novel compounds .....</b>                   | <b>17</b> |
| <b>IR spectra for all novel compounds .....</b>                    | <b>88</b> |

## General Synthetic Methods

Melting points were measured using a digital melting point apparatus (Electrothermal). IR spectra were recorded on a Perkin-Elmer Spectrum 1000 FT IR Spectrometer.  $^1\text{H}$ - and  $^{13}\text{C}$ -NMR spectra were acquired at 300 K using a Bruker Avance NMR spectrometer at 400 and 100 MHz, respectively. Chemical shifts are reported relative to TMS ( $\delta = 0.0$  ppm), and signals are designated as s (singlet), d (doublet), t (triplet), dt (double triplet), dd (doublet of doublets), ddd (double doublet of doublets) or m (multiplet), with coupling constants given in Hertz (Hz). Mass spectral data were collected using a Waters Micromass ZQ instrument coupled to a Waters 2695 HPLC with a Waters 2996 PDA. Waters Micromass ZQ parameters used were: Capillary (kV): 3.38, Cone (V): 35, Extractor (V): 3.0, Source temperature ( $^{\circ}\text{C}$ ): 100, Desolvation Temperature ( $^{\circ}\text{C}$ ): 200, Cone flow rate (L/h): 50, De-solvation flow rate (L/h): 250. High resolution mass spectroscopy data were recorded on a Waters Micromass QTOF Global in positive W-mode using metal-coated borosilicate glass tips to introduce the samples into the instrument. Thin Layer Chromatography (TLC) was performed on silica gel aluminium plates (Merck 60,  $\text{F}_{254}$ ), and flash chromatography utilised silica gel (Merck 60, 230-400 mesh ASTM). 60% hydrogen peroxide aqueous solution was purchased from Fisher Scientific Inc. and used within one week. All other reagents were purchased from Sigma-Aldrich Co.

## Synthesis of the benzo[*b*]thiophenecarboxamides

Benzo[*b*]thiophenecarboxamides used as substrates in the oxidation reactions were synthesised *via* three different routes.

The nitro-substituted starting materials employed in the oxidation reactions for entries **3**, **9**, and **12** of **Table 1** were synthesised according to representative procedure as follows:

Oxalyl chloride (293  $\mu\text{l}$ , 3.36 mmol, 2.2 eq) was added to a magnetically stirred solution of benzo[*b*]thiophene-5-carboxylic acid (300 mg, 1.68 mmol, 1.1 eq) in anhydrous DCM (20 ml) at room temperature. Triethylamine (1.28 ml, 9.24 mmol, 5.5 eq) was then added to the mixture and the reaction was stirred at room temperature for 15 min under nitrogen atmosphere. A solution of 4-nitroaniline (210 mg, 1.52 mmol, 1.0 eq) in DCM (15 ml) was then cannulated into the flask and the reaction mixture was allowed to stir at room temperature for 18 h. The solution was diluted with DCM (40 ml) and washed with water (2 x 50 ml). The organic phase was dried over  $\text{MgSO}_4$  and concentrated under reduced pressure to afford *N*-(4-nitrophenyl)benzo[*b*]thiophene-5-carboxamide as brown solid (360 mg, 80%).

*N*-(4-nitrophenyl)benzo[*b*]thiophene-2-carboxamide

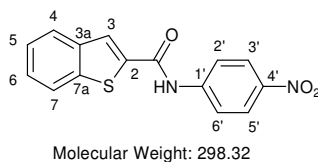

Yellow crystals, 90% yield. m.p. 279-281  $^{\circ}\text{C}$ . IR (ATR,  $\nu_{\text{max}}/\text{cm}^{-1}$ ): 3386 (sharp NH band), 3049, 2956, 1672, 1607, 1593, 1540, 1496, 1482, 1403, 1326, 1300, 1246, 1176, 1110, 1037, 879, 844, 748, 689, 639, 611.  $^1\text{H}$  NMR (400 MHz,  $\text{CDCl}_3$ ):  $\delta$  7.28-

7.32 (m, 2 H, H5 and H6), 7.72-7.77 (m, 2 H, H4 and H7), 7.91 (d, 2 H,  $J = 7.3$  Hz, H2' and H6'), 8.07 (d, 2 H,  $J = 7.4$  Hz, H3' and H5'), 8.09 (s, 1 H, H3), 10.28 (s, 1 H, NH).  $^{13}\text{C}$  NMR (100 MHz,  $\text{CDCl}_3$ ) :  $\delta$  119.8 (C2' and C6'), 122.7 (C7), 124.6 (C3' and C5'), 124.9 (C4), 125.1 (C5), 126.5 (C3), 126.6 (C7), 139.0 (C4a), 141.3 (C4'), 141.5 (C7a), 143.2 (C1'), 144.3 (C2), 162.0 (C=O) Note:  $d_6$ -DMSO was added to the NMR tube for dissolving the analyte. MS ( $\text{ESI}^+$ )  $m/z$  (relative intensity): 298.68 ( $[M + \text{H}]^+$ , 100%). HRMS: Theoretical mass  $[M + \text{H}]^+$ , 299.0490; Measured mass  $[M + \text{H}]^+$ , 299.0505 ( $\delta$  5 ppm). Elem. Anal. calculated for  $\text{C}_{15}\text{H}_{10}\text{N}_2\text{O}_3\text{S}$ : C, 60.39; H, 3.38; N, 9.39%. Found: C, 60.11; H, 3.50; N, 9.28%.

*N*-(4-nitrophenyl)benzo[*b*]thiophene-3-carboxamide

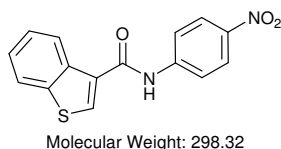

Brown solid, 40% yield. IR (ATR:  $\nu_{\text{max}}/\text{cm}^{-1}$ ): 3386, 3110, 1560, 1538, 1488, 1300, 1250, 1215, 1175, 1151, 1109, 1055, 956, 842, 763, 744, 718, 686.  $^1\text{H}$  NMR ( $d_6$ -DMSO, 400 MHz): rotamers  $\delta$  7.43-7.54 (m, 2 H, H5 and H6), 8.07 (d, 2 H,  $J = 9.2$  Hz, H2' and H6'), 8.11 (dd, 1 H,  $J = 1.0, 7.0$  Hz, H7), 8.32 (d, 2 H,  $J = 9.2$  Hz, H3' and H5'), 8.43 (d, 1 H,  $J = 7.6$  Hz, H4), 8.71 (s, 1 H, H2), 10.93 (s, 1 H, NH).  $^{13}\text{C}$  NMR ( $\text{CDCl}_3$ , 100 MHz): rotamers  $\delta$  119.6 (C2' and 6'), 122.9 (C7), 124.1 (C4), 124.9 (C3' and C5'), 125.2 and 125.3 (C5 and C6), 130.2 (C3), 133.5 (C2), 136.9 (C3a), 139.4 (C7a), 142.3 (C4'), 145.4 (C1'), 162.2 (C=O). MS ( $\text{ESI}^+$ )  $m/z$  (relative intensity): 299.03 ( $[M + \text{H}]^+$ , 100%). HRMS: Theoretical mass  $[M + \text{H}]^+$ , 299.0490; Measured mass  $[M + \text{H}]^+$ , 299.0476 ( $\delta$  4.7 ppm).

*N*-(4-nitrophenyl)benzo[*b*]thiophene-5-carboxamide

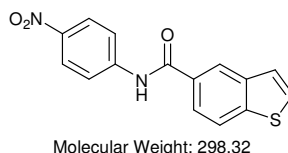

Brown solid, 80% yield. IR (ATR:  $\nu_{\text{max}}/\text{cm}^{-1}$ ): 3282, 3080, 1775, 1654, 1594, 1498, 1405, 1325, 1248, 1150, 1112, 1049, 846, 745, 689.  $^1\text{H}$  NMR ( $d_6$ -DMSO, 400 MHz): rotamers  $\delta$  7.63 (d, 1 H,  $J = 5.4$  Hz, H3), 7.92 (d, 1 H,  $J = 5.4$  Hz, H2), 7.95 (dd, 1 H,  $J = 8.5, 1.6$  Hz, H6), 8.10 (d, 2 H,  $J = 9.1$  Hz, H2' and H6'), 8.20 (d, 1 H,  $J = 8.5$  Hz, H7), 8.29 (d, 2 H,  $J = 9.1$  Hz, H3' and H5'), 8.55 (d, 1 H,  $J = 1.3$  Hz, H4), 10.92 (s, 1 H, NH).  $^{13}\text{C}$  NMR ( $\text{CDCl}_3$ , 100 MHz): rotamers  $\delta$  119.8 (C2' and 6'), 122.7 (C7), 123.4 (C6), 123.6 (C4), 124.5 (C3), 124.8 (C3' and C5'), 129.3 (C2), 130.5 (C5), 139.1 (C3a), 142.4 (C7a), 142.6 (C4'), 145.6 (C1'), 166.4 (C=O). MS ( $\text{ESI}^+$ )  $m/z$  (relative intensity): 298.50 ( $[M + \text{H}]^+$ , 100%). HRMS: Theoretical mass  $[M + \text{H}]^+$ , 299.0478; Measured mass  $[M + \text{H}]^+$ , 299.0490 ( $\delta$  4 ppm).

Benzo[*b*]thiophene-2-carboxamides used as starting material in oxidation reactions for entries **2** and **4** of **Table 1** were synthesised from benzothiophene-2-carbonylchloride according to representative procedure as follows:

Benzo[*b*]thiophene-2-carbonyl chloride (500 mg, 2.54 mmol, 1.0 eq) was added in portions to a solution of 4-nitroaniline (315 mg, 2.3 mmol, 0.9 eq) and TEA (0.68 ml, 5.0 mmol, 2.0 eq) in anhydrous THF (10 ml) at room temperature under magnetic stirring. The reaction mixture was stirred for 4 h at room temperature. The product precipitated out of solution and was collected by filtration, and washed with small amounts of THF to give *N*-(4-methoxyphenyl)benzo[*b*]thiophene-2-carboxamide as gray solid (548 mg, 76%).

*N*-(4-methoxyphenyl)benzo[*b*]thiophene-2-carboxamide

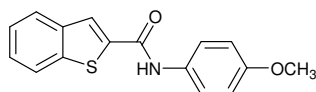

Molecular Weight: 283.34

Gray solid, 76% yield. m.p. 226–229 °C. IR (ATR,  $\nu_{\text{max}}/\text{cm}^{-1}$ ): 3344, 2977, 2946, 1634, 1597, 1514, 1476, 1397, 1243, 1173, 1031, 820, 808, 754, 734, 634.  $^1\text{H}$  NMR (400 MHz,  $\text{CDCl}_3$ ):  $\delta$  3.78 (s, 3 H, H-( $\text{OCH}_3$ )), 6.86 (d, 2 H,  $J$  = 8.8 Hz, H3' and H5'), 7.38 (qt, 2 H,  $J$  = 6.8 Hz, H5 and H6), 7.68 (d, 2 H,  $J$  = 8.8 Hz, H2' and H6'), 7.84 (d, 2 H,  $J$  = 7.3 Hz, H4 and H7), 8.18 (s, 1 H, H3), 8.77 (s, 1 H, NH).  $^{13}\text{C}$  NMR (100 MHz,  $\text{CDCl}_3$ ):  $\delta$  55.5 (C-( $\text{OCH}_3$ )), 114.1 (C3' and C5'), 122.4 (C2' and C6'), 122.6 (C7), 124.8 (C4), 125.2 (C5), 125.9 (C3), 126.3 (C6), 131.2 (C1'), 139.4 (C2), 139.5 (C4a), 141.1 (C7a), 156.5 (C4'), 160.5 (C=O). MS (ESI $^+$ )  $m/z$  (relative intensity): 283.70 ( $[M + \text{H}]^+$ , 100%). HRMS: Theoretical mass  $[M + \text{H}]^+$ , 284.0745; Measured mass  $[M + \text{H}]^+$ , 284.0734 ( $\delta$  4 ppm).

*N*-isopropylbenzo[*b*]thiophene-2-carboxamide

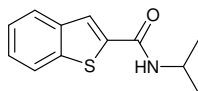

Molecular Weight: 219.3

White solid, 80% yield. m.p. 148–149 °C. IR (ATR,  $\nu_{\text{max}}/\text{cm}^{-1}$ ): 3264, 2972, 1625, 1549, 1455, 1287, 1198, 841, 742.  $^1\text{H}$  NMR (400 MHz,  $\text{CDCl}_3$ ):  $\delta$  1.19 (m, 6H, H-( $\text{CH}_3$ ) $_2$ ), 4.22 (s, 1H, H-(CH)), 5.88 (s, 1H, NH), 7.30 (m, 2H, H5 and H6), 7.74 (m, 2H, H4 and H7), 7.67 (s, 1H, H3).  $^{13}\text{C}$  NMR (100 MHz,  $\text{CDCl}_3$ ):  $\delta$  22.8 (C-( $\text{CH}_3$ ) $_2$ ), 42.3 (C-(CH)), 122.7 (C3), 124.8 (C4), 124.9 (C7), 126.2 (C5 and C6), 138.9 (C3a), 139.1 (C7a), 140.7 (C2), 161.5 (C=O).



(*S*)-Ethyl 2-(benzo[*b*]thiophene-2-carboxamido)-3-phenylpropanoate (starting material forentry **6**) was synthesised according to Yoo and Li<sup>1</sup> as follows:

(*S*)-Ethyl 2-(benzo[*b*]thiophene-2-carboxamido)-3-phenylpropanoate

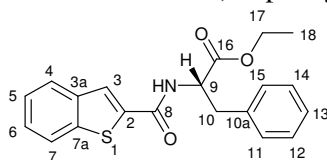

Molecular Weight: 353.43

T-Hydro<sup>®</sup> (2.1 ml, 6.5 mmol, 1.1 eq) and thianaphene-2-carboxaldehyde (1.001 g, 6.17 mmol, 1 eq) were added to a mixture of CuI (11.21 mg, 0.06 mmol, 1 % mol), AgIO<sub>3</sub> (17.8 mg, 0.06 mmol, 1 % mol), *L*-phenylalanine ethyl ester hydrochloric acid (2.770 g, 9.49 mmol, 1.5 eq) and CaCO<sub>3</sub> (0.710 g, 7.10 mmol, 1.1 eq) in MeCN (2 ml). The mixture was allowed to stir at room temperature for 32 h. The mixture was then purified by flash chromatography EtOAc /hexane gradient to provide (*S*)-Ethyl 2-(benzo[*b*]thiophene-2-carboxamido)-3-phenylpropanoate as a colorless oil (1.7 g, 69%). IR (ATR,  $\nu_{\text{max}}$ /cm<sup>-1</sup>): 695, 716, 746, 766, 806, 863, 1042, 1081, 1112, 1180, 1219, 1277, 1366, 1427, 1450, 1538, 1643, 1733, 3266. <sup>1</sup>H NMR (400 MHz, CDCl<sub>3</sub>):  $\delta$  1.31 (t, 3 H, *J* = 7.1 Hz, H18), 3.25 – 3.35, (dd, 2 H, *J* = 5.9 and 8.6 Hz, H10a and H10b), 4.23 – 4.28 (q, 2 H, *J* = 7.2 Hz, H17a and H17b), 5.07 – 5.12 (q, 1 H, *J* = 7.3 and 5.9 Hz, H9), 6.62 (d, 1 H, *J* = 7.3 Hz, NH), 7.18 (d, 2 H, *J* = 7.8, H11 and H15), 7.29 – 7.31 (m, 3 H, H13, H12 and H14), 7.40 – 7.44 (m, 2 H, *J* = 1.4, 1.7 and 7.1 Hz, H5 and H6), 7.75, (s, 1 H, H3), 7.84 (t, 2 H, *J* = 9.0, H4 and H7). <sup>13</sup>C NMR (100 MHz, CDCl<sub>3</sub>) :  $\delta$  14.2 (CH<sub>3</sub>), 38.0 (CH<sub>2</sub>), 53.6 (C9), 61.8 (OCH<sub>2</sub>), 122.7 (C7), 125.0 (C4), 125.1 (C3), 125.5 (C5), 126.5 (C6), 127.2 (C12 and C14), 128.6 (C13), 129.5 (C11 and C15), 135.7 (C10a), 137.9 (C3a), 139.0 (C7a), 141.0 (C2), 161.6 (NC=O), 171.3 (OC=O). MS (ESI<sup>+</sup>) *m/z* (relative intensity): 160.97 ([*M* – Phe + H]<sup>+</sup> 100 %), 280.08 ([*M* – COOCH<sub>2</sub>CH<sub>3</sub>]<sup>+</sup> 10 %), 376.09 ([*M* + Na]<sup>+</sup> 20%).

All other benzo[*b*]thiophenecarboxamides used as starting materials in oxidation reactions for entries **1**, **5**, **7**, **8**, **10**, and **11** of **Table 1** were synthesised from the commercially available benzo[*b*]thiophenecarboxylic acids using standard amide coupling conditions according to representative procedure as follows:

Aniline (105  $\mu$ g, 1.15 mmol, 1.03 eq) was added to a solution of benzo[*b*]thiophene-3-carboxylic acid (200 mg, 1.12 mmol, 1.0 eq), *N*-(3-dimethylaminopropyl)-*N*-ethyl carbodiimide hydrochloride (257 mg, 1.34 mmol, 1.2 eq), and dimethylaminopyridine (27 mg, 0.22 mmol, 0.2 eq) in dry DCM (5 ml) at room temperature. The reaction mixture was magnetically stirred for 16 h at room temperature when a precipitate crashed out of solution. The solids were collect by filtration and washed with minimum DCM to give *N*-(4-methoxyphenyl)benzo[*b*]thiophene-3-carboxamide as a white solid (281 mg, 98 %).

*N*-phenylbenzo[*b*]thiophene-2-carboxamide

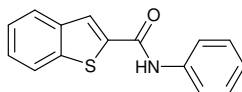

Molecular Weight: 253.32

White solid, 72% yield. m.p. 205-207 °C. IR (ATR,  $\nu_{\max}/\text{cm}^{-1}$ ): 3375 (sharp NH band), 3049, 1638, 1595, 1522, 1438, 1315, 1244, 1187, 1080, 941, 869, 840, 752, 735, 685.  $^1\text{H}$  NMR (400 MHz,  $\text{CDCl}_3$ ):  $\delta$  7.14 (t, 1 H,  $J = 7.4$  Hz, H4'), 7.41 (t, 2 H,  $J = 7.5$  Hz, H3' and H5'), 7.50 (m, 2 H, H5 and H6), 7.79 (d, 2 H,  $J = 7.6$  Hz, H2' and H6'), 8.02 (d, 1 H,  $J = 8.8$  Hz, H6), 8.06 (d, 1 H,  $J = 9.0$  Hz, H5), 8.38 (s, 1 H, H3), 10.50 (s, 1 H, NH).  $^{13}\text{C}$  NMR (100 MHz,  $\text{CDCl}_3$ ):  $\delta$  120.3 (C2' and C6'), 122.8 (C7), 123.9 (C4'), 125.0 (C4), 125.8 (C5), 126.5 (C6), 128.7 (C3' and C5'), 138.6 (C1'), 139.1 (C4a), 140.0 (C7a), 140.5 (C2), 160.3 (C=O). MS (ESI<sup>+</sup>)  $m/z$  (relative intensity): 253.74 ( $[M + \text{H}]^+$ , 100%). HRMS: Theoretical mass  $[M + \text{H}]^+$ , 254.0640; Measured mass  $[M + \text{H}]^+$ , 254.0633 ( $\delta$  3 ppm). Elem. Anal. calculated for  $\text{C}_{15}\text{H}_{11}\text{NOS}$ : C, 71.12; H, 4.38; N, 5.53%. Found: C, 71.08; H, 4.31; N, 5.49%.

#### *N*-cyclohexylbenzo[*b*]thiophene-2-carboxamide

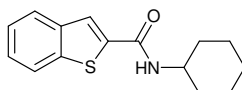

Molecular Weight: 259.37

Off-white solid, 74% yield. m.p. 165.2 – 166.8 °C. IR (ATR,  $\nu_{\max}/\text{cm}^{-1}$ ): 3287, 2930, 1609, 1540, 1448, 1338, 1205, 1156, 1071, 874, 719, 662.  $^1\text{H}$  NMR (400 MHz,  $\text{CDCl}_3$ ):  $\delta$  1.19 (m, 2H, H2' and H6'), 1.14 (m, 2H, H4'), 1.64 (m, 4H, H3' and H5'), 1.97 (s, 2H, H2' and H6'), 3.91 (m, 1H, H1'), 5.92 (s, 1H, NH), 7.32 (t, 2H,  $J = 6.0$  Hz, H5 and H6), 7.75 (m, 2H, H4 and H7), 7.67 (s, 1H, H3).  $^{13}\text{C}$  NMR (100 MHz,  $\text{CDCl}_3$ ):  $\delta$  24.9 (C3' and C5'), 25.3 (C4'), 33.2 (C2' and C6'), 49.0 (C1'), 122.7 (C3), 124.86 (C7), 124.9 (C5 or C6), 124.93 (C4), 126.2 (C5 or C6), 138.97 (C3a), 139.15 (C7a), 140.7 (C2), 161.3 (C=O). MS (ESI<sup>+</sup>)  $m/z$  (relative intensity): 281.06 ( $[M + \text{Na}]^+$ , 100%).

#### *N*-phenylbenzo[*b*]thiophene-3-carboxamide

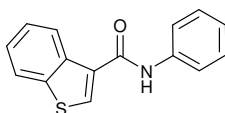

Molecular Weight: 253.32

White solid, 98 % yield. m.p. 179 - 182 °C. IR (ATR,  $\nu_{\max}/\text{cm}^{-1}$ ): 3281 (sharp NH band), 3090, 3059, 1642, 1596, 1520, 1496, 1440, 1314, 1251, 1217, 1066, 1021, 884, 854, 765, 753, 732, 708, 689.  $^1\text{H}$  NMR (400 MHz,  $\text{CDCl}_3$ ):  $\delta$  7.17 (t, 1 H,  $J = 7.4$  Hz, H4'), 7.38 (t, 2 H,  $J = 8.1$  Hz, H3' and H5'), 7.42 – 7.50 (m, 2 H, H5 and H6), 7.64 (d, 2 H,  $J = 7.7$  Hz, H2' and H6'), 7.81 (br s, 1 H, NH), 7.89 (d, 1 H,  $J = 8.1$  Hz, H7), 7.98 (s, 1 H, H2), 8.41 (d, 1 H,  $J = 7.8$  Hz, H4).  $^{13}\text{C}$  NMR (100 MHz,  $\text{CDCl}_3$ ):  $\delta$  120.3 (C2' and C6'), 122.6 (C7), 124.3 (C4), 124.7 (C4'), 125.3 (C5 and C6), 129.2 (C3' and C5'), 129.6 (C2), 132.4 (C3), 136.7 (C4a), 137.8 (C1'), 140.3 (C7a), 162.0 (C=O). MS (ESI<sup>+</sup>)  $m/z$  (relative intensity): 253.89 ( $[M + \text{H}]^+$ , 100%). HRMS: Theoretical mass  $[M + \text{H}]^+$ , 254.0640; Measured mass  $[M + \text{H}]^+$ , 254.0625 ( $\delta$  5 ppm).

*N*-(4-methoxyphenyl)benzo[*b*]thiophene-3-carboxamide

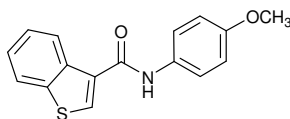

Molecular Weight: 283.34

Red solid, 64% yield. m.p. 225 - 226 °C. IR (ATR,  $\nu_{\max}/\text{cm}^{-1}$ ): 3287, 3085, 2956, 1637, 1509, 1458, 1411, 1300, 1231, 1171, 1034, 822, 813, 766, 703, 685.  $^1\text{H}$  NMR (400 MHz,  $\text{CDCl}_3$ ):  $\delta$  3.77 (s, 3 H, H-( $\text{OCH}_3$ )), 6.95 (d, 2 H,  $J = 9.0$  Hz, H3' and H5'), 7.46 (q, 2 H,  $J = 7.1$  Hz, H5 and H6), 7.68 (d, 2 H,  $J = 9.0$  Hz, H2' and H6'), 8.05 (d, 1 H,  $J = 7.0$  Hz, H7), 8.42 (d, 1 H,  $J = 7.1$  Hz, H4), 8.52 (s, 1 H, H3), 10.20 (s, 1 H, NH).  $^{13}\text{C}$  NMR (100 MHz,  $\text{CDCl}_3$ ):  $\delta$  55.2 (C-( $\text{OCH}_3$ )), 113.8 (C3' and C5'), 121.8 (C2' and C6'), 122.8 (C7), 124.3 (C4), 124.8 (C5), 124.9 (C6), 131.2 (C2), 131.3 (C3), 132.1 (C1'), 137.2 (C4a), 139.4 (C7a), 155.5 (C4'), 161.5 (C=O). MS (ESI $^+$ )  $m/z$  (relative intensity): 283.83 ( $[M + \text{H}]^+$ , 100%). HRMS: Theoretical mass  $[M + \text{H}]^+$ , 284.0667; Measured mass  $[M + \text{H}]^+$ , 284.0736. Elem. Anal. calculated for  $\text{C}_{16}\text{H}_{13}\text{NO}_2\text{S}$ : C, 67.82; H, 4.62; N, 4.94%. Found: C, 67.62; H, 4.61; N, 4.94%.

*N*-phenylbenzo[*b*]thiophene-5-carboxamide

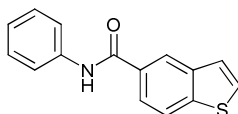

Molecular Weight: 253.32

Red solid, 77 % yield. m.p. 187-188 °C. IR (ATR,  $\nu_{\max}/\text{cm}^{-1}$ ): 3359 (sharp NH band), 3080, 1770, 1654, 1594, 1522, 1440, 1321, 1238, 1158, 1120, 993, 901, 822, 750, 730, 686, 624.  $^1\text{H}$  NMR (400 MHz,  $d_6$ -DMSO):  $\delta$  7.12 (t, 1 H,  $J = 7.3$  Hz, H4'), 7.37 (t, 2 H,  $J = 7.7$  Hz, H3' and H5'), 7.62 (d, 1 H,  $J = 5.4$  Hz, H3), 7.82 (d, 2 H,  $J = 7.8$  Hz, H2' and H6'), 7.90 (d, 1 H,  $J = 5.4$  Hz, H2), 7.94 (dd, 1 H,  $J = 1.3, 8.4$  Hz, H6), 8.16 (d, 1 H,  $J = 8.4$  Hz, H7), 8.53, (s, 1 H, H4), 10.34 (s, 1 H, NH).  $^{13}\text{C}$  NMR (100 MHz,  $d_6$ -DMSO):  $\delta$  120.3 (C2' and C6'), 122.5 (C7), 123.2 (C4), 123.3 (C6), 123.6 (C4'), 124.4 (C3), 128.6 (C3' and C5'), 128.9 (C2), 131.3 (C5), 139.1 (C4a), 139.3 (C1'), 142.0 (C7a), 165.6 (C=O). MS (ESI $^+$ )  $m/z$  (relative intensity): 253.74 ( $[M + \text{H}]^+$ , 100%). HRMS: Theoretical mass  $[M + \text{H}]^+$ , 254.0640; Measured mass  $[M + \text{H}]^+$ , 254.0634 ( $\delta$  2 ppm). Elem. Anal. calculated for  $\text{C}_{15}\text{H}_{11}\text{NOS}$ : C, 71.12; H, 4.38; N, 5.53%. Found: C, 71.18; H, 4.31; N, 5.48%.

*N*-(4-methoxyphenyl)benzo[*b*]thiophene-5-carboxamide

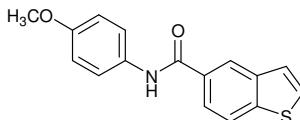

Molecular Weight: 283.34

Colourless solid, 96 % yield. m.p. 211-213 °C. IR (ATR,  $\nu_{\max}/\text{cm}^{-1}$ ): 3349 (sharp NH band), 3075, 1774, 1648, 1599, 1508, 1407, 1321, 1234, 1158, 1120, 1052, 993, 900, 821, 804, 756, 730, 695, 646, 622.  $^1\text{H}$  NMR (400 MHz,  $d_6$ -DMSO):  $\delta$  3.76 (s, 3 H,  $\text{OCH}_3$ ), 6.95 (d, 2 H,  $J = 8.9$  Hz, H3' and H5'), 7.61 (d, 1 H,  $J = 5.3$  Hz, H3), 7.71 (d,

2 H,  $J = 8.8$  Hz, H2' and H6'), 7.89 (d, 1 H,  $J = 5.4$  Hz, H2), 7.93 (d, 1 H,  $J = 8.4$  Hz, H6), 8.15 (d, 1 H,  $J = 8.4$  Hz, H7), 8.51 (s, 1 H, H4), 10.22 (s, 1 H, NH).  $^{13}\text{C}$  NMR (100 MHz,  $d_6$ -DMSO) :  $\delta$  55.2 (OCH<sub>3</sub>), 113.7 (C3' and C5'), 121.9 (C3' and C5'), 122.5 (C7), 123.1 (C4), 123.2 (C6), 124.4 (C3), 128.8 (C2), 131.4 (C5), 132.3 (C1'), 139.1 (C4a), 141.9 (C7a), 155.5 (C4'), 165.2 (C=O). MS (ESI<sup>+</sup>)  $m/z$  (relative intensity): 283.84 ( $[M + H]^+$ , 100%). HRMS: Theoretical mass  $[M + H]^+$ , 284.0745; Measured mass  $[M + H]^+$ , 284.0750 ( $\delta$  2 ppm). Elem. Anal. calculated for C<sub>16</sub>H<sub>13</sub>NO<sub>2</sub>S: C, 67.82; H, 4.62; N, 4.94%. Found: C, 67.67; H, 4.71; N, 4.91%.

## Synthesis of sulfur-containing substrates

Sulfur-containing starting materials in oxidation reactions shown in **Table 3** that had not been previously reported in literature<sup>2</sup> or were not commercially available were synthesized as described below.

### 2-(3-nitrophenyl)benzo[*b*]thiophene

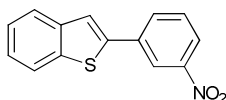

Molecular Weight: 255.29

Pd(PPh<sub>3</sub>)<sub>4</sub> (129 mg, 0.11 mmol, 0.1 eq) was added to a solution of 3-nitrobromobenzene (272 mg, 1.34 mmol, 1.1 eq), thianaphthlene boronic acid (200 mg, 1.12 mmol, 1.0 eq) and CsF<sup>2</sup> (340 mg, 2.24 mmol, 2.0 eq) in acetonitrile/water (3:1 ratio; 5 ml) under nitrogen atmosphere and magnetic stirring in an Emrys<sup>TM</sup> Process vial. The vial was sealed with Reseal<sup>TM</sup> septa, and the solution was heated at 110°C under microwave radiation<sup>1</sup> for 20 minutes. The product 013-DA-118-01 crystallised out of the reaction mixture and was collected by filtration (gently washed with diethyl ether) as yellow solid (242 mg, 84%). m.p. 156-158 °C. IR (ATR,  $\nu_{\text{max}}$ /cm<sup>-1</sup>): 3055, 3075, 1511, 1432, 1345, 1251, 1189, 1074, 985, 832, 805, 748, 723, 670.  $^1\text{H}$  NMR (CDCl<sub>3</sub>, 400 MHz)  $\delta$  7.37-7.39 (m, 2 H, (H5 and H6), 7.60 (t, 1 H, H5'), 7.67 (s, 1 H, H3), 7.82 (dd, 1 H,  $J = 1.88, 8.34$  Hz, H4), 7.85 (dd, 1 H,  $J = 1.72, 8.63$  Hz, H7), 7.99 (dd, 1 H,  $J = 0.83, 7.80$  Hz, H6'), 8.18 (dd, 1 H,  $J = 1.30, 7.76$  Hz, H4'), 8.55 (t, 1 H,  $J = 1.81$  Hz, H2').  $^{13}\text{C}$  NMR (CDCl<sub>3</sub>, 100 MHz):  $\delta$  149.2 (C3'), 141.2 (C2), 140.3 (C3a), 139.8 (C7a), 136.1 (C1'), 132.1 (C6'), 130.0 (C5'), 125.3 (C6), 125.0 (C5), 124.1 (C4), 122.6 (C4'), 122.4 (C7), 121.4 (C3), 121.1 (C2'). MS (ES<sup>+</sup>)  $m/z$  (relative intensity) mass peak not observed by electron spray ionization. HRMS: Theoretical mass  $[M + H]^+$ , 256.0427; Measured mass  $[M + H]^+$ , 256.0436 ( $\delta$  4 ppm).

<sup>1</sup> Emrys<sup>TM</sup> Optimizer microwave station (Personal Chemistry).

<sup>2</sup> Some drops of TEA were also added.

*N*-(2-(methylthio)ethyl)benzamide and *N*-(4-(methylthio)phenyl)acetamide used as starting materials \* for entries **5** and **6** of **Table 3** were synthesized as follows:

Acetyl (or benzoyl) chloride (1.01 eq) was added dropwise to a stirred solution of amine (or aniline) (1.0 eq) and TEA (2.0 eq) in THF (25 ml) at room temperature. After total consumption of the starting material (~1 h) the solution was diluted with EtOAc (100 ml) and washed with water (3 × 100 ml), dried with MgSO<sub>4</sub> and concentrated *in vacuo* to afford the products as colourless solids.

#### *N*-(2-(methylthio)ethyl)benzamide

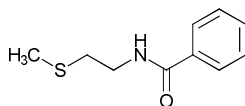

Molecular Weight: 195.28

Colourless oil (96% yield), IR (ATR,  $\nu_{\max}/\text{cm}^{-1}$ ): 3322, 2918, 1632, 1527, 1487, 1434, 1358, 1295, 1229, 1189, 1156, 1077, 1036, 1002, 944, 852, 802, 765, 721, 692, 660. <sup>1</sup>H-NMR (CDCl<sub>3</sub>, 400 MHz):  $\delta$  2.14 (s, 3 H, CH<sub>3</sub>), 2.76 (t, 2 H,  $J$  = 6.4 Hz, SCH<sub>2</sub>), 3.66 (q, 2 H,  $J$  = 6.3 Hz, NHCH<sub>2</sub>), 6.64 (br s, 1 H, NH), 7.43 (t, 2 H,  $J$  = 7.0 Hz, H3' and H5'), 7.50 (t, 1 H,  $J$  = 7.4 Hz, H4'), 7.78 (d, 2 H,  $J$  = 7.1 Hz, H2' and H6'). <sup>13</sup>C NMR (100 MHz, CDCl<sub>3</sub>):  $\delta$  15.0 (SCH<sub>3</sub>), 33.9 (SCH<sub>2</sub>), 38.0 (NHCH<sub>2</sub>), 126.9 (C2' and C6'), 128.6 (C3' and C5'), 131.5 (C4'), 134.5 (C1'), 167.5 (C=O). MS (ESI<sup>+</sup>)  $m/z$  (relative intensity): 196.44 ([*M* + H]<sup>+</sup> 95%).

#### *N*-(4-(methylthio)phenyl)acetamide

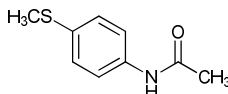

Molecular Weight: 181.25

Colourless oil, (90% yield) IR (ATR,  $\nu_{\max}/\text{cm}^{-1}$ ): 3272, 3168, 3096, 2916, 1656, 1644, 1591, 1540, 1491, 1436, 1393, 1366, 1320, 1291, 1256, 1096, 1042, 1012, 952, 844, 820, 760, 608. <sup>1</sup>H-NMR (CDCl<sub>3</sub>, 400 MHz):  $\delta$  2.15 (s, 3 H, CH<sub>3</sub>), 2.45 (s, 3 H, SCH<sub>3</sub>), 7.22 (d, 2 H,  $J$  = 8.6 Hz, H3' and H5'), 7.37 (br s, 1 H, NH), 7.42 (d, 2 H,  $J$  = 8.6 Hz, H2' and H6'). <sup>13</sup>C NMR (100 MHz, CDCl<sub>3</sub>):  $\delta$  16.7 (SCH<sub>3</sub>), 24.5 (CH<sub>3</sub>), 120.6 (C3 and C5), 128.0 (C2 and C6), 133.6 (C1), 135.6 (C4), 168.3 (C=O). MS (ESI<sup>+</sup>)  $m/z$  (relative intensity): 182.37 ([*M* + H]<sup>+</sup> 100%).

### Syntheses of benzo[*b*]thiophene 1,1-dioxides

**Method A, H<sub>2</sub>O<sub>2</sub>-P<sub>2</sub>O<sub>5</sub> Reagent** (Representative procedure). \* The H<sub>2</sub>O<sub>2</sub>-P<sub>2</sub>O<sub>5</sub> reagent (0.78 ml, 0.68 mmol, 2.0 eq) was added dropwise to a magnetically stirring suspension of *N*-phenylbenzo[*b*]thiophene-2-carboxamide (86 mg, 0.34 mmol, 1.0 eq) in CH<sub>3</sub>CN (4 ml) in a test tube. The tube was sealed and the reaction mixture was stirred at room temperature until LC-MS showed complete consumption of starting material (9 h). Water (4 x volume of CH<sub>3</sub>CN) was then added to the reaction mixture while stirring and the precipitate was collected by vacuum filtration and briefly

\* The acetyl and benzoyl protecting groups were introduced to facilitate analyses (monitoring reaction time) of the oxidation reactions by LC-MS and TLC.

washed with water and small amounts of diethyl ether. The precipitate was dried over  $\text{CaCl}_2$  (desiccator, overnight) to give benzo[*b*]thiophene 1,1-dioxide **4a** as yellow solids (95 mg, 98%).

\* *Preparation of the  $\text{H}_2\text{O}_2$ - $\text{P}_2\text{O}_5$  reagent.*

Recently purchased 60% hydrogen peroxide aqueous solution (cold, ice-bath) was slowly pipetted onto 20.02 g of phosphorous pentoxide in a conical flask while moving the flask in an ice slurry. The formed lumps were smashed with a glass rod and the resulting solution (~ 40 ml) was transferred to a volumetric flask and additional 60% hydrogen peroxide was added to complete a final volume of 50 ml.<sup>1</sup> The solution was transferred to a glass bottle and stored at 4°C in a refrigerator.<sup>2,3</sup>

*Note 1:* The final volume was completed with 60% hydrogen peroxide solution used to rinse ( $2 \times \sim 3$  ml) the conical flask.

*Note 2:* We observed that the concentration of the reactive phosphorous species (peroxymonophosphoric acid) in the  $\text{P}_2\text{O}_5$ - $\text{H}_2\text{O}_2$  reagent may vary depending on the quality of the 60% hydrogen peroxide aqueous solution. A titration can be easily carried out to determine the concentration of peroxymonophosphoric acid using small amounts (100 mg) of thianaphthene (**1**, MW: 134.20) at room temperature (app. 25 °C). This requires 1.70 ml of the  $\text{H}_2\text{O}_2$ - $\text{P}_2\text{O}_5$  reagent for 100% sulfone conversion (app. 45 min), thus giving the concentration of the reactive species as 0.88 M. This titration was repeated four times (in the same day the reagent was prepared) to check its reproducibility.

*Note 3:* Titration (see Note 2) indicated a 50% reduction in the oxidizing properties of the reagent after three weeks which demanded larger volumes of the  $\text{H}_2\text{O}_2$ - $\text{P}_2\text{O}_5$  reagent for complete conversion to sulfone. It is recommended that the reagent should be used within two weeks of preparation.

**Method B,  $\text{H}_2\text{O}_2$ -TFAA** (Representative procedure). 60% hydrogen peroxide aqueous solution (189  $\mu\text{l}$ , 3.95 mmol, 10.0 eq) was added dropwise to a magnetically stirring solution of trifluoroacetic anhydride (0.55 ml, 3.95 mmol, 10.0 eq) in  $\text{CH}_3\text{CN}$  (1.0 ml) in a test tube in an ice-bath. The tube was sealed and the mixture was allowed to stir for one hour in the same temperature. *N*-phenylbenzo[*b*]thiophene-5-carboxamide (83 mg, 0.32 mmol, 1.0 eq) was then added in portion to the previous solution. The ice-bath was removed and the sealed vessel was allowed to reach room temperature while the reaction mixture was monitored by LC-MS. A precipitated was formed and the reaction was monitored for 8 h when LC-MS showed complete consumption of the starting material. The reaction was quenched with water (5 ml) and the precipitated collected by filtration, and washed with water (3 ml), and dried over  $\text{CaCl}_2$  (desiccator, overnight) to give **4j** as a colourless solid. (88 mg, 98%).

**Method C, DMDO** (Representative procedure). 0.07-0.09M dimethyldioxirane acetic solution\* (6.85 ml, 0.48 mmol, 2.4 eq, as for 0.07 M) was added to a solution of *N*-phenylbenzo[*b*]thiophene-2-carboxamide (50 mg, 0.20 mmol, 1.0 eq) in DCM (1.0 ml) under magnetic stirring at room temperature. The excess solvent was removed after 15min to afford **4a** as a yellow solid. (53 mg, 98%)

\* Freshly prepared according to *Organic Syntheses, Coll. Vol. 9, p.288 (1998); Vol. 74, p.91 (1997)*.

## Analytical data for the oxidized products

### benzo[*b*]thiophene 1,1-dioxide (**2**)<sup>2</sup>

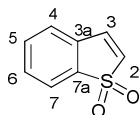

Colourless solid. m.p. 92–98 °C. IR (ATR:  $\nu_{\max}/\text{cm}^{-1}$ ): 3114, 3062 (Ar C-H), 1551, 1458, 1448, 1280, 1191, 1146, 1121, 1060, 940, 867, 794, 764, 766, 752, 696, 725. <sup>1</sup>H NMR (CDCl<sub>3</sub>, 400 MHz):  $\delta$  6.72 (d, 1 H,  $J$  = 6.93 Hz, H2); 7.22 (dd, 1 H,  $J$  = 6.91, 0.77 Hz, H3); 7.36 (dd, 1 H,  $J$  = 6.29, 1.52 Hz, H7); 7.55 (m, 2 H, H5 and H6); 7.73 (dd, 1 H,  $J$  = 6.03, 1.10 Hz, H4).

### *N*-phenylbenzo[*b*]thiophene-2-carboxamide 1,1-dioxide (**4a**)

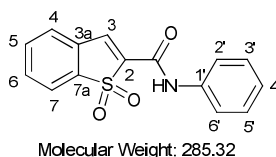

Yellow solid. m.p. 257-258 °C. IR (ATR,  $\nu_{\max}/\text{cm}^{-1}$ ): 3270, (sharp NH band), 3111, 2992, 1681, 1606, 1544, 1501, 1440, 1280, 1251, 1070, 1049, 1018, 878, 811, 748, 700, 679. <sup>1</sup>H NMR (400 MHz, *d*<sub>6</sub>-DMSO):  $\delta$  7.16 (t, 1 H,  $J$  = 7.4 Hz, H4'), 7.40 (t, 2 H,  $J$  = 7.7 Hz, H3' and H5'), 7.69 (d, 2 H,  $J$  = 7.8 Hz, H2' and H6'), 7.75-7.83 (dm, 3 H, H4, H5, and H6), 7.94 (d, 1 H,  $J$  = 6.8 Hz, H7), 8.39 (s, 1 H, H3), 10.47 (s, 1 H, NH). <sup>13</sup>C NMR (100 MHz, *d*<sub>6</sub>-DMSO) :  $\delta$  120.1 (C2' and C6'), 121.4 (C7), 124.4 (C4'), 127.7 (C4), 128.1 (C2), 128.9 (C3' and C5'), 132.7 (C6), 134.3 (C2 and C5), 136.3 (C4a), 137.3 (C7a), 138.0 (C1'), 156.6 (C=O). MS (ESI<sup>+</sup>)  $m/z$  (relative intensity): 285.82 ( $[M + H]^+$ , 100%). HRMS: Theoretical mass  $[M + H]^+$ , 286.0538; Measured mass  $[M + H]^+$ , 286.0545 ( $\delta$  2 ppm). Elem. Anal. calculated for C<sub>15</sub>H<sub>11</sub>NO<sub>3</sub>S: C, 63.14; H, 3.89; N, 4.91%. Found: C, 63.08; H, 3.97; N, 4.87%.

### *N*-(4-methoxyphenyl)benzo[*b*]thiophene-2-carboxamide 1,1-dioxide (**4b**)

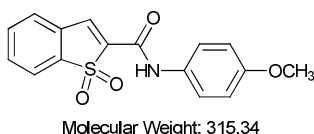

Yellow solid. m.p. 234 - 236 °C. IR (ATR,  $\nu_{\max}/\text{cm}^{-1}$ ): 3390, 3058, 2951, 1654, 1616, 1573, 1535, 1507, 1454, 1439, 1411, 1291, 1243, 1148, 1128, 1033, 881, 825, 765, 744, 661. <sup>1</sup>H NMR (400 MHz, *d*<sub>6</sub>-DMSO):  $\delta$  3.77 (t, 3 H, H-(OCH<sub>3</sub>)), 6.97 (d, 2 H,  $J$  = 9.0 Hz, H3' and H5'), 7.60 (d, 2 H,  $J$  = 9.0 Hz, H2' and H6'), 7.75 - 7.82 (m, 3 H, H5, H6 and H7), 7.93 (d, 1 H,  $J$  = 7.6 Hz, H7), 8.33 (s, 1 H, H3), 10.37 (s, 1 H, NH). <sup>13</sup>C NMR (100 MHz, *d*<sub>6</sub>-DMSO) :  $\delta$  55.2 (C-(OCH<sub>3</sub>)), 114.0 (C3' and C5'), 121.4 (C7), 121.7 (C2' and C6'), 127.6 (C4), 128.1 (C2), 131.0 (C1'), 132.6 (C6), 133.8 (C3), 134.3 (C5), 136.5 (C4a), 137.3 (C7a), 156.0 (C4'), 156.2 (C=O). MS (ESI<sup>+</sup>)  $m/z$  (relative intensity): 315.67 ( $[M + H]^+$ , 100%). HRMS: Theoretical mass  $[M + H]^+$ ,

316.0644; Measured mass  $[M + H]^+$ , 316.0653 ( $\delta$  3 ppm). Elem. Anal. calculated for  $C_{16}H_{13}NO_4S$ : C, 60.94; H, 4.16; N, 4.44%. Found: C, 60.95; H, 4.25; N, 4.32%.

*N*-isopropylbenzo[*b*]thiophene-2-carboxamide 1,1-dioxide (**4d**)

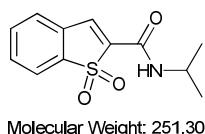

White solid. m.p. 181.1 – 182.8 °C. IR (ATR,  $\nu_{\max}/\text{cm}^{-1}$ ): 3324, 2982, 1622, 1540, 1454, 1305, 1148, 918, 766, 663.  $^1\text{H}$  NMR (400 MHz,  $\text{CDCl}_3$ ):  $\delta$  1.21 (d, 6H,  $J$  = 6.8 Hz, H-( $\text{CH}_3$ )<sub>2</sub>), 4.18 (m, 1H, H-(CH)), 6.15 (s, 1H, NH), 7.43 (m, 1H, H4), 7.68 (m, 1H, H7), 7.56 (t, 2H,  $J$  = 4.0 Hz, H5 and H6), 7.74 (s, 1H, H3).  $^{13}\text{C}$  NMR (100 MHz,  $\text{CDCl}_3$ ):  $\delta$  22.5 (C-( $\text{CH}_3$ )<sub>2</sub>), 42.4 (C-(CH)), 121.9 (C7), 126.9 (C4), 129.4 (C2), 132.2 (C5 or C6), 134.2 (C5 or C6), 136.2 (C3), 137.1 (C3a), 137.4 (C7a), 156.01 (C=O). MS (ESI<sup>+</sup>)  $m/z$  (relative intensity): 251.19 ( $[M + H]^+$ , 100%). HRMS: Theoretical mass  $[M + H]^+$ , 252.0694; Measured mass  $[M + H]^+$ , 252.0688 ( $\delta$  3 ppm). Elem. Anal. calculated for  $C_{12}H_{13}NO_3S$ : C, 57.35; H, 5.21; N, 5.57%. Found: C, 57.35; H, 5.15; N, 5.52%.

*N*-cyclohexylbenzo[*b*]thiophene-2-carboxamide 1,1-dioxide (**4e**)

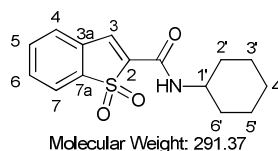

White solid. m.p. 196.4 – 197.8 °C. IR (ATR,  $\nu_{\max}/\text{cm}^{-1}$ ): 3358, 2931, 1639, 1522, 1295, 1146, 918, 763, 708.  $^1\text{H}$  NMR (400 MHz,  $\text{CDCl}_3$ ):  $\delta$  1.30 (m, 4H, H3' and H5'), 1.54 (m, 2H, H2' and H6'), 1.69 (m, 2H, H4'), 1.94 (d, 2H,  $J$  = 12.0 Hz, H2' and H6'), 3.90 (m, 1H, H1'), 6.23 (s, 1H, NH), 7.42 (m, 1H, H4), 7.68 (m, 1H, H7), 7.54 (t, 2H,  $J$  = 3.6 Hz, H5 and H6), 7.74 (s, 1H, H3).  $^{13}\text{C}$  NMR (100 MHz,  $\text{CDCl}_3$ ):  $\delta$  24.6 (C3' and C5'), 25.4 (C4'), 32.6 (C2' and C6'), 49.0 (C1'), 121.9 (C7), 126.9 (C4), 129.40 (C2), 132.1 (C5 or C6), 134.2 (C5 or C6), 136.2 (C3), 137.1 (C3a), 137.5 (C7a), 155.9 (C=O). MS (ESI<sup>+</sup>)  $m/z$  (relative intensity): 291.88 ( $[M + H]^+$ , 100%). HRMS: Theoretical mass  $[M + H]^+$ , 292.1007; Measured mass  $[M + H]^+$ , 292.1002 ( $\delta$  2 ppm). Elem. Anal. calculated for  $C_{15}H_{17}NO_3S$ : C, 61.83; H, 5.88; N, 4.81%. Found: C, 61.85; H, 5.69; N, 4.81%.

(*S*)-Ethyl 2-(benzo[*b*]thiophene-2-carboxamido)-3-phenylpropanoate 1,1-dioxide (**4f**)

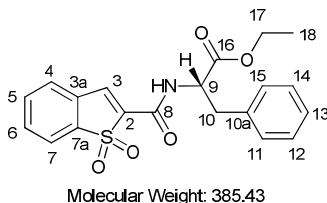

Colourless oil. IR (ATR:  $\nu_{\max}/\text{cm}^{-1}$ ): 3341, 3070, 1736, 1661, 1530, 1302, 1211, 1174, 1107, 1028, 849, 762, 730, 700.  $^1\text{H}$  NMR (400MHz,  $\text{CDCl}_3$ ):  $\delta$  1.31 (t, 3 H,  $J$  = 6.1



Hz, H18), 3.16 (dd, 1 H,  $J = 6.3, 14.0$  Hz, H10), 3.31 (dd, 1 H,  $J = 6.3, 14.0$  Hz, H10), 4.25 (q, 2 H,  $J = 7.1$  Hz, H17), 5.01 (q, 1 H,  $J = 7.1$  Hz, H9), 6.60 (d,  $J = 7.7$  Hz, NH), 6.73 (s, 1 H, H3), 7.12 (d,  $J = 7.7$  Hz, H11 and H15), 7.26-7.54 (m, 3 H, H12, H13 and H14), 7.54 (m, 2 H, H5 and H6), 7.68-7.71 (m, 2 H, H4 and H7).  $^{13}\text{C}$  NMR (100 MHz,  $\text{CDCl}_3$ )<sup>a</sup>:  $\delta$  12.6 (C18), 36.1 (C10), 51.8 (C9), 60.6 (C17), 120.0 (C7), 124.0 (C4), 126.0 (C13), 127.3 (C12 and C14), 127.4 (C3), 127.7 (C11 and C15), 129.6 (C6), 132.3 (C5), 133.7 (C10a), 135.4 (C3a), 136.6 (C7a), 159.4 (NC=O), 169.2 (OC=O). MS (ESI<sup>+</sup>)  $m/z$  (relative intensity): 386.5 ( $[M + H]^+$ , 100%).

<sup>a</sup> C2 carbon not observed using default relaxation time (1.00 sec.).

*N*-phenylbenzo[*b*]thiophene-3-carboxamide 1,1-dioxide (**4g**)

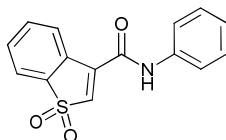

Molecular Weight: 285.32

Light-yellow solid. m.p. 188 - 190 °C. IR (ATR,  $\nu_{\text{max}}/\text{cm}^{-1}$ ): 3356, 3075, 1672, 1597, 1539, 1488, 1440, 1288, 1243, 1205, 1175, 1137, 1109, 877, 834, 758, 694.  $^1\text{H}$  NMR (400 MHz,  $\text{CDCl}_3$ ):  $\delta$  7.00 (s, 1 H, H2), 7.21 (t, 1 H,  $J = 7.4$  Hz, H4'), 7.41 (d, 2 H,  $J = 7.4$  Hz, H3' and H5'), 7.54 - 7.66 (m, 4 H, H2', H6', H5, and H6), 7.72 (d, 1 H,  $J = 7.4$  Hz, H4), 7.93 (d, 1 H,  $J = 7.4$  Hz, H7), 8.26 (s, 1 H, H, NH).  $^{13}\text{C}$  NMR (100 MHz,  $\text{CDCl}_3$ ):  $\delta$  120.4 (C2' and C6'), 121.5 (C4), 125.7 (C4'), 126.0 (C7), 128.4 (C2), 129.2 (C1'), 129.3 (C3' and C5'), 131.2 (C5), 134.1 (C6), 136.7 (C3), 136.8 (C4a), 138.9 (C7a), 159.5 (C=O). MS (ESI<sup>+</sup>)  $m/z$  (relative intensity): 285.80 ( $[M + H]^+$ , 100%). HRMS: Theoretical mass  $[M + H]^+$ , 286.0538; Measured mass  $[M + H]^+$ , 286.0526 ( $\delta$  4 ppm). Elem. Anal. calculated for  $\text{C}_{15}\text{H}_{11}\text{NO}_3\text{S}$ : C, 63.14; H, 3.89; N, 4.91%. Found: C, 63.10; H, 3.81; N, 5.01%.

*N*-(4-methoxyphenyl)benzo[*b*]thiophene-3-carboxamide 1,1-dioxide (**4h**)

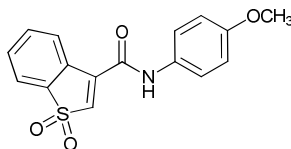

Molecular Weight: 315.34

Light-yellow solid. m.p. 135 - 138 °C. IR (ATR,  $\nu_{\text{max}}/\text{cm}^{-1}$ ): 3245, 1649, 1610, 1566, 1513, 1297, 1242, 1172, 1105, 1030, 831, 760, 729, 682.  $^1\text{H}$  NMR (400 MHz,  $\text{CDCl}_3$ ):  $\delta$  3.83 (s, 1 H, H-(OCH<sub>3</sub>)), 6.93 (d, 2 H,  $J = 9.0$  Hz, H3' and H5'), 6.96 (s, 1 H, H2), 7.54 (d, 2 H,  $J = 9.0$  Hz, H2' and H6'), 7.57 - 7.63 (m, 2 H, H5 and H6), 7.73 (d, 1 H,  $J = 6.6$  Hz, H4), 7.94 (d, 1 H,  $J = 6.8$  Hz, H4), 7.97 (s, 1 H, NH).  $^{13}\text{C}$  NMR (100 MHz,  $\text{CDCl}_3$ ):  $\delta$  55.5 (C-(OCH<sub>3</sub>)), 114.5 (C3' or C5'), 121.5 (C4), 122.1 (C2' and C6'), 125.9 (C7), 128.2 (C2), 129.2 (C3), 129.6 (C1'), 131.2 (C6), 134.0 (C5), 137.0 (C4a), 139.0 (C7a), 157.4 (C4'), 159.3 (C=O). MS (ESI<sup>+</sup>)  $m/z$  (relative intensity): 315.83 ( $[M + H]^+$ , 100%). HRMS: Theoretical mass  $[M + H]^+$ , 316.0644; Measured mass  $[M + H]^+$ , 316.0633 ( $\delta$  3 ppm). Elem. Anal. calculated for  $\text{C}_{16}\text{H}_{13}\text{NO}_4\text{S}$ : C, 60.94; H, 4.16; N, 4.44%. Found: C, 59.91; H, 4.15; N, 4.40%.

*N*-(4-nitrophenyl)benzo[*b*]thiophene-3-carboxamide 1,1-dioxide (**4i**)

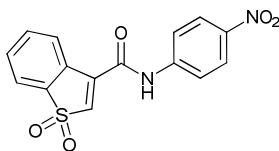

Molecular Weight: 330.32

Yellow solid. m.p. 263-264 °C. IR (ATR:  $\nu_{\max}/\text{cm}^{-1}$ ): 3343, 3092, 1802, 1686, 1615, 1599, 1550, 1504, 1331, 1286, 1198, 1169, 1135, 1106, 978, 882, 828, 764, 751, 686, 662.  $^1\text{H}$  NMR ( $d_6$ -DMSO, 400 MHz): rotamers  $\delta$  7.70-7.79 (m, 2 H, H5 and H6), 7.87 (d, 1 H,  $J = 7.3$  Hz, H4), 7.95 (s, 1 H, H2), 8.00-8.05 (m, 3 H, H2', H6', and H7), 8.32 (d, 2 H,  $J = 9.0$  Hz, H3' and H5'), 11.4 (s, 1 H, NH).  $^{13}\text{C}$  NMR ( $d_6$ -DMSO, 100 MHz): rotamers  $\delta$  120.0 (C2' and 6'), 121.7 (C7), 125.0 (C3' and C5'), 125.3 (C4), 128.5 (C3), 130.9 (C2), 131.4 (C6), 134.3 (C5), 136.5 (C3a), 136.9 (C7a), 143.1 (C4'), 144.1 (C1'), 160.7 (C=O). MS (ESI $^-$ )  $m/z$  (relative intensity): 329.38 ( $[M - \text{H}]^-$ , 100%). HRMS: Theoretical mass  $[M + \text{H}]^+$ , 331.0389; Measured mass  $[M + \text{H}]^+$ , 331.0375 ( $\delta$  4.2 ppm). HRMS (positive mode): Theoretical mass  $[M + \text{H}]^+$ , 331.0389; Measured mass  $[M + \text{H}]^+$ , 331.0375 ( $\delta$  4.2 ppm). HRMS (negative mode): Theoretical mass  $[M - \text{H}]^-$ , 329.0232; Measured mass  $[M - \text{H}]^-$ , 329.0227 ( $\delta$  2 ppm).

*N*-phenylbenzo[*b*]thiophene-5-carboxamide 1,1-dioxide (**4j**)

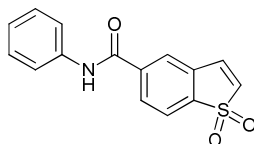

Molecular Weight: 285.32

Colourless solid. m.p. 247 - 249 °C. IR (ATR,  $\nu_{\max}/\text{cm}^{-1}$ ): 3338, 3090, 3049, 1655, 1597, 1530, 1498, 1440, 1337, 1289, 1194, 1151, 1134, 1101, 1069, 904, 800, 750, 714, 682, 626.  $^1\text{H}$  NMR (400 MHz,  $d_6$ -DMSO):  $\delta$  7.14 (t, 1 H,  $J = 7.2$  Hz, H4'), 7.39 (t, 2 H,  $J = 7.7$  Hz, H3' and H5'), 7.49 (d, 1 H,  $J = 6.8$  Hz, H2), 7.74 -7.78 (m, 3 H, H3, H2' and H6'), 8.03 (d, 1 H,  $J = 7.7$  Hz, H7), 8.11 (s, 1 H, H4), 8.16 (d, 1 H,  $J = 7.7$  Hz, H6), 10.5 (s, 1 H, NH).  $^{13}\text{C}$  NMR (100 MHz,  $d_6$ -DMSO):  $\delta$  120.4 (C2' or C6'), 121.1 (C7), 124.1 (C4'), 125.3 (C4), 128.7 (C3' and C5'), 130.2 (C6), 131.6 (C4a), 131.9 (C2), 132.5 (C3), 138.4 (C5), 138.7 (C1'), 140.3 (C7a), 164.0 (C=O). MS (ESI $^+$ )  $m/z$  (relative intensity): 285.8 ( $[M + \text{H}]^+$ , 100%).

*N*-(4-methoxyphenyl)benzo[*b*]thiophene-5-carboxamide 1,1-dioxide (**4k**)

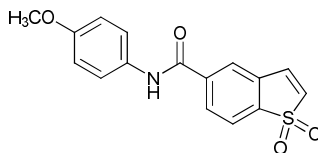

Molecular Weight: 315.34

Light-yellow solid. m.p. 251 - 253 °C. IR (ATR,  $\nu_{\max}/\text{cm}^{-1}$ ): 3307, 3096, 1652, 1528, 1517, 1290, 1235, 1196, 1152, 1135, 1032, 838, 820, 747, 682.  $^1\text{H}$  NMR (400 MHz,  $d_6$ -DMSO):  $\delta$  3.76 (s, 1 H, OCH<sub>3</sub>), 6.96 (d, 2 H,  $J = 6.9$  Hz, H3' and H5'), 7.48 (d, 1

H,  $J = 6.9$  Hz, H2), 7.67 (d, 2 H,  $J = 9.0$  Hz, H2' and H6'), 7.73 (dd, 1 H,  $J = 0.6, 6.9$  Hz, H3), 8.02 (d, 1 H,  $J = 7.8$  Hz, H7), 8.10 (s, 1 H, H4), 8.14 (dd, 1 H,  $J = 1.2, 7.9$  Hz, H6), 10.4 (s, 1 H, NH).  $^{13}\text{C}$  NMR (100 MHz,  $d_6$ -DMSO):  $\delta$  55.2 (OCH<sub>3</sub>), 113.8 (C3' or C5'), 121.1 (C7), 122.0 (C2' and C6'), 125.2 (C4), 130.1 (C6), 131.6 (C1'), 131.7 (C4a), 131.9 (C2), 132.5 (C3), 138.3 (C7a), 140.3 (C5), 155.8 (C4'), 163.5 (C=O). MS (ESI<sup>+</sup>)  $m/z$  (relative intensity): 315.76 ( $[M + H]^+$ , 100%). HRMS: Theoretical mass  $[M + H]^+$ , 316.0644; Measured mass  $[M + H]^+$ , 316.0644 ( $\delta$  0 ppm). Elem. Anal. calculated for C<sub>16</sub>H<sub>13</sub>NO<sub>4</sub>S: C, 60.94; H, 4.16; N, 4.44%. Found: C, 60.94; H, 4.10; N, 4.31%.

*N*-(4-nitrophenyl)benzo[*b*]thiophene-5-carboxamide 1,1-dioxide (**4l**)

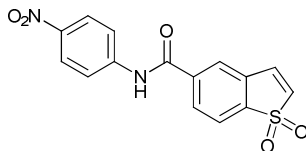

Molecular Weight: 330.32

Light-yellow solid. m.p. 269-270°C decomposes and 291-293°C melts. IR (ATR:  $\nu_{\text{max}}/\text{cm}^{-1}$ ): 3328, 3070, 1796, 1677, 1590, 1543, 1497, 1330, 1294, 27, 1148, 1109, 1070, 855, 789, 750, 688.  $^1\text{H}$  NMR ( $d_6$ -DMSO, 400 MHz): rotamers  $\delta$  7.52 (d, 1 H,  $J = 6.6$  Hz, H2), 7.76 (d, 1 H,  $J = 6.9$  Hz, H3), 8.04 (d, 2 H,  $J = 9.2$  Hz, H2' and H6'), 8.07 (d, 1 H,  $J = 8.0$  Hz, H7), 8.13 (s, 1 H, H4), 8.18 (d, 1 H,  $J = 7.8$  Hz, H6), 8.28 (d, 2 H,  $J = 9.2$  Hz, H3' and H5'), 11.05 (s, 1 H, NH).  $^{13}\text{C}$  NMR ( $d_6$ -DMSO, 100 MHz): rotamers  $\delta$  120.0 (C2' and 6'), 121.3 (C7), 124.8 (C3' and C5'), 125.5 (C4), 130.6 (C6), 131.6 (C2), 132.0 (C3), 132.4 (C3a), 138.8 (C5), 139.5 (C7a), 142.8 (C4'), 144.9 (C1'), 164.7 (C=O). MS (ESI<sup>-</sup>)  $m/z$  (relative intensity): 329.53 ( $[M - H]^-$ , 100%). HRMS: Theoretical mass  $[M + H]^+$ , 331.0389; Measured mass  $[M + H]^+$ , 331.0388 ( $\delta > 1$  ppm).

5-bromobenzo[*b*]thiophene 1,1-dioxide<sup>3</sup> (**5**)

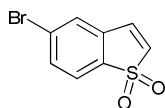

Molecular Weight: 245.09

White solid. HRMS: Theoretical mass  $[M + \text{Na}]^+$ , 266.9091; Measured mass  $[M + \text{Na}]^+$ , 266.9079 ( $\delta$  4 ppm). Elem. Anal. calculated for C<sub>8</sub>H<sub>5</sub>BrO<sub>2</sub>S: C, 39.20; H, 2.06. Found: C, 39.21; H, 1.99%.

2-phenylbenzo[*b*]thiophene 1,1-dioxide<sup>2</sup> (**6**)

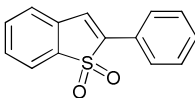

Molecular Weight: 242.29

Light-yellow solid.  $^1\text{H}$ -NMR (CDCl<sub>3</sub>, 400 MHz):  $\delta$  7.55-7.65 (m, 3 H, H3', H4', and H5'), 7.68 (t, 1 H,  $J = 7.6$  Hz, H6), 7.71 (d, 1 H,  $J = 7.2$  Hz, H4), 7.80 (t, 1 H,  $J = 7.6$

Hz, H5), 7.92 (d, 2 H,  $J = 8.0$  Hz, H2' and H6'), 7.99 (d, 1 H,  $J = 7.2$  Hz, H7), 8.05 (s, 1 H, H2). MS (ESI<sup>+</sup>)  $m/z$  (relative intensity): 243.30 ( $[M + H]^+$  100%).

2-(3-nitrophenyl)benzo[b]thiophene 1,1-dioxide (**7**)

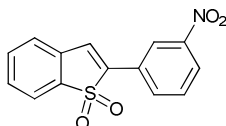

Molecular Weight: 287.29

Colourless solid. m.p. 240-242 °C. IR (ATR,  $\nu_{\max}/\text{cm}^{-1}$ ): 3092, 1569, 1530, 1453, 1337, 1292, 1247, 1200, 1152, 1125, 1094, 896, 869, 831, 762, 737, 666. <sup>1</sup>H NMR (CDCl<sub>3</sub>, 400 MHz)  $\delta$  7.49 (m, 2 H, (H4 and H3), 7.58 (dt, 1 H,  $J = 0.89, 7.51$  Hz, H6), 7.64 (dt, 1 H,  $J = 1.05, 7.52$  Hz, H5), 7.70 (t, 1 H,  $J = 8.04$  Hz, H5'), 7.81 (d, 1 H,  $J = 7.45$  Hz, H7), 8.23 (dd, 1 H,  $J = 1.07, 7.87$  Hz, H6'), 8.31 (dd, 1 H,  $J = 1.32, 8.28$  Hz, H4'), 8.61 (t, 1 H,  $J = 1.86$  Hz, H2'). <sup>13</sup>C NMR (CDCl<sub>3</sub>, 100 MHz):  $\delta$  148.5 (C3'), 140.5 (C2), 137.1 (C7a), 134.1 (C5), 132.1 (C6'), 130.8 (C6), 130.5 (C5'), 129.5 (C3a), 129.0 (C1'), 126.4 (C3), 125.7 (C4), 124.6 (C4'), 121.8 (C7), 121.6 (C2'). MS (ESI<sup>+</sup>)  $m/z$  (relative intensity) mass peak not observed by electron spray ionization. HRMS: Theoretical mass  $[M + H]^+$ , 288.0325; Measured mass  $[M + H]^+$ , 288.0326 ( $\delta$  3 ppm).

2,5-dimethylthiophene 1,1-dioxide<sup>4</sup> (**8**)

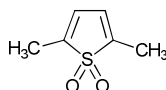

Molecular Weight: 144.19

MS (ESI<sup>+</sup>)  $m/z$  (relative intensity): 145.26 ( $[M + H]^+$  100%).

*N*-(2-(methylsulfonyl)ethyl)benzamide (**9**)

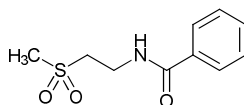

Molecular Weight: 227.28

Colourless oil. IR (ATR,  $\nu_{\max}/\text{cm}^{-1}$ ): 3310, 3013, 2920, 1634, 1537, 1488, 1369, 1278, 1185, 1164, 1120, 1076, 1058, 961, 880, 804, 694, 668. <sup>1</sup>H-NMR (CDCl<sub>3</sub>, 400 MHz) rotamers:  $\delta$  2.99 (s, 3 H, SCH<sub>3</sub>), 3.38 (t, 2 H,  $J = 5.7$  Hz, NHCH<sub>2</sub>), 3.98 (q, 3 H,  $J = 5.97$  Hz, SO<sub>2</sub>CH<sub>2</sub>), 7.26-7.30 (br s, 1 H, NH), 7.42 (t, 2 H,  $J = 7.3$  Hz, H3' and H5'), 7.50 (t, 2 H,  $J = 7.3$  Hz, H4'), 7.77 (d, 2 H,  $J = 7.3$  Hz, H2' and H6'). <sup>13</sup>C NMR (100 MHz, CDCl<sub>3</sub>):  $\delta$  33.8 (NHCH<sub>2</sub>), 41.6 (SCH<sub>3</sub>), 53.7 (SCH<sub>2</sub>), 127.1 (C2' and C6'), 128.8 (C3' and C5'), 132.2 (C4'), 133.3 (C1'), 168.2 (C=O). MS (ESI<sup>+</sup>)  $m/z$  (relative intensity): 228.43 ( $[M + H]^+$  100%). HRMS: Theoretical mass  $[M + H]^+$ , 228.0694; Measured mass  $[M + H]^+$ , 228.0699 ( $\delta$  2 ppm).

*N*-(4-(methylsulfonyl)phenyl)acetamide (**10**)

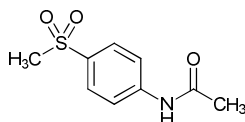

Molecular Weight: 213.25

White crystals. m.p. 202-204 °C. IR (ATR,  $\nu_{\text{max}}/\text{cm}^{-1}$ ): 3351, 3027, 3003, 2925, 1670, 1588, 1532, 1503, 1438, 1388, 1276, 1132, 1086, 965, 836, 821, 777, 660.  $^1\text{H}$ -NMR (400 MHz,  $d_6$ -DMSO):  $\delta$  2.15 (s, 3 H,  $\text{CH}_3$ ), 3.20 (s, 3 H,  $\text{SCH}_3$ ), 7.86 (d, 2 H,  $J = 9.0$  Hz,  $\text{H}_2'$  and  $\text{H}_6'$ ), 7.90 (d, 2 H,  $J = 8.9$  Hz,  $\text{H}_3'$  and  $\text{H}_5'$ ), 10.42 (s, 1 H, NH).  $^{13}\text{C}$  NMR (100 MHz,  $d_6$ -DMSO):  $\delta$  24.1 ( $\text{CH}_3$ ), 43.8 ( $\text{SCH}_3$ ), 118.6 ( $\text{C}_3'$  and  $\text{C}_5'$ ), 128.1 ( $\text{C}_2'$  and  $\text{C}_6'$ ), 134.4 ( $\text{C}_1'$ ), 143.6 ( $\text{C}_4'$ ), 169.1 ( $\text{C}=\text{O}$ ). MS ( $\text{ESI}^+$ )  $m/z$  (relative intensity): 214.29 ( $[\text{M} + \text{H}]^+$  100%). HRMS: Theoretical mass  $[\text{M} + \text{H}]^+$ , 214.0538; Measured mass  $[\text{M} + \text{H}]^+$ , 214.0529 ( $\delta$  4 ppm). Elem. Anal. calculated for  $\text{C}_9\text{H}_{11}\text{NO}_3\text{S}$ : C, 71.63; H, 5.51; N, 6.96%. Found: C, 71.58; H, 5.48; N, 6.93%.

## References

1. Yoo, W. J.; Li, C. J. *J. Am. Chem. Soc.* **2006**, *128*, 13064-13065.
2. Geneste, P.; Olive, J. L.; Ung, S. N.; El Faghi, M. E. A.; Easton, J. W.; Beierbeck, H.; Saunders, J. K. *J. Org. Chem.* **1979**, *44*, 2887-2892.
3. Chapman, N. B.; Ewing, D. F.; Scrowston, R. M.; Westwood, R. *J. Chem. Soc. C* **1968**, 764-769.
4. Rozen, S.; Bareket, Y. *J. Org. Chem.* **1997**, *62*, 1457-1462.

## NMR spectra for all novel compounds

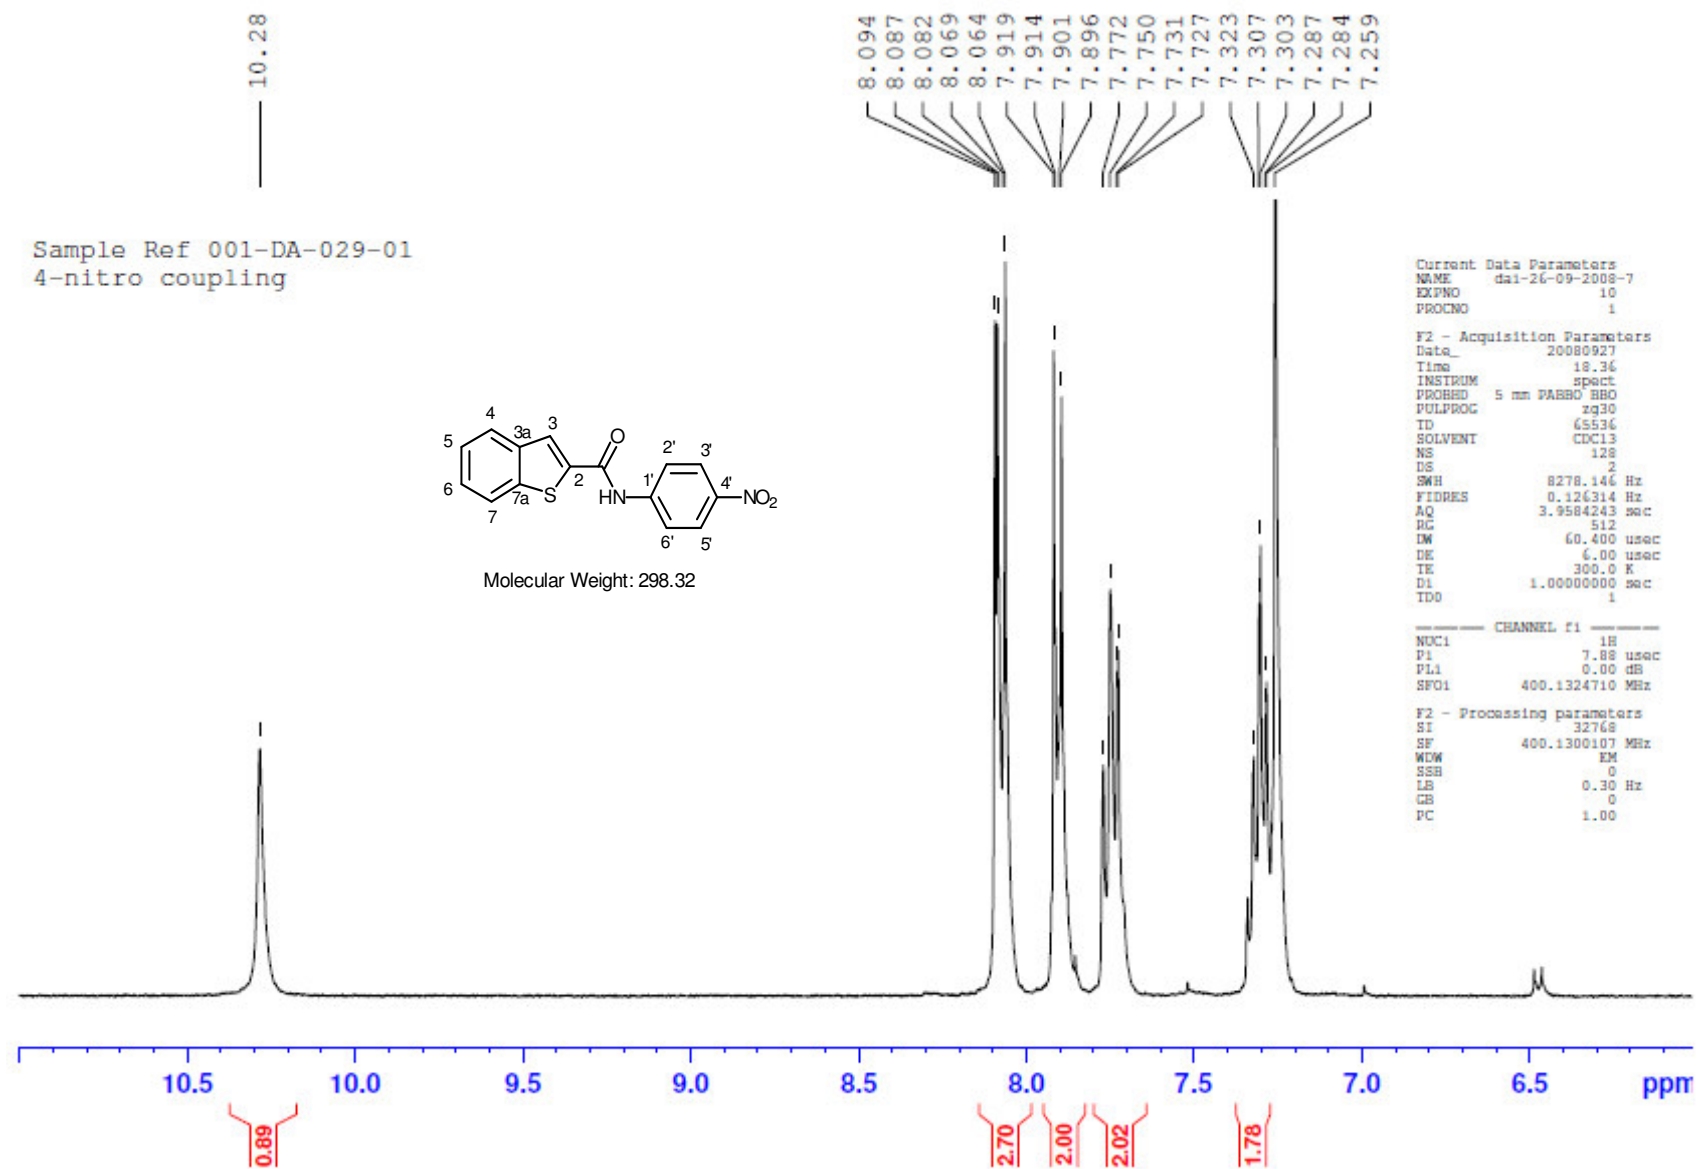

Sample Ref 001-DA-029-01  
4-nitro coupling

Current Data Parameters  
NAME dal-26-09-2008-7  
EXPNO 12  
PROCNO 1

F2 - Acquisition Parameters  
Date\_ 20080927  
Time 19.36  
INSTRUM spect  
PROBHD 5 mm PABBO BBO  
PULPROG zgpg30  
TD 65536  
SOLVENT CDCl3  
NS 1024  
DS 4  
SWH 23980.814 Hz  
FIDRES 0.365918 Hz  
AQ 1.3664756 sec  
RG 1290.2  
DW 20.950 usec  
DE 6.00 usec  
TE 300.0 K  
D1 1.00000000 sec  
d11 0.03000000 sec  
DELTA 0.89999999 sec  
TD0 1

===== CHANNEL f1 =====  
NUC1 13C  
P1 7.87 usec  
PL1 0.00 dB  
SFO1 100.6228298 MHz

===== CHANNEL f2 =====  
CPDPRG2 waltz16  
NUC2 1H  
PCPD2 80.00 usec  
PL2 0.00 dB  
PL12 20.00 dB  
PL13 20.00 dB  
SFO2 400.1316005 MHz

F2 - Processing parameters  
SI 32768  
SF 100.6127690 MHz  
WDW EM  
SSB 0  
LB 1.00 Hz  
GB 0  
PC 1.40

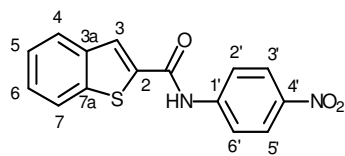

Molecular Weight: 298.32

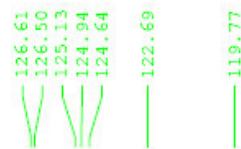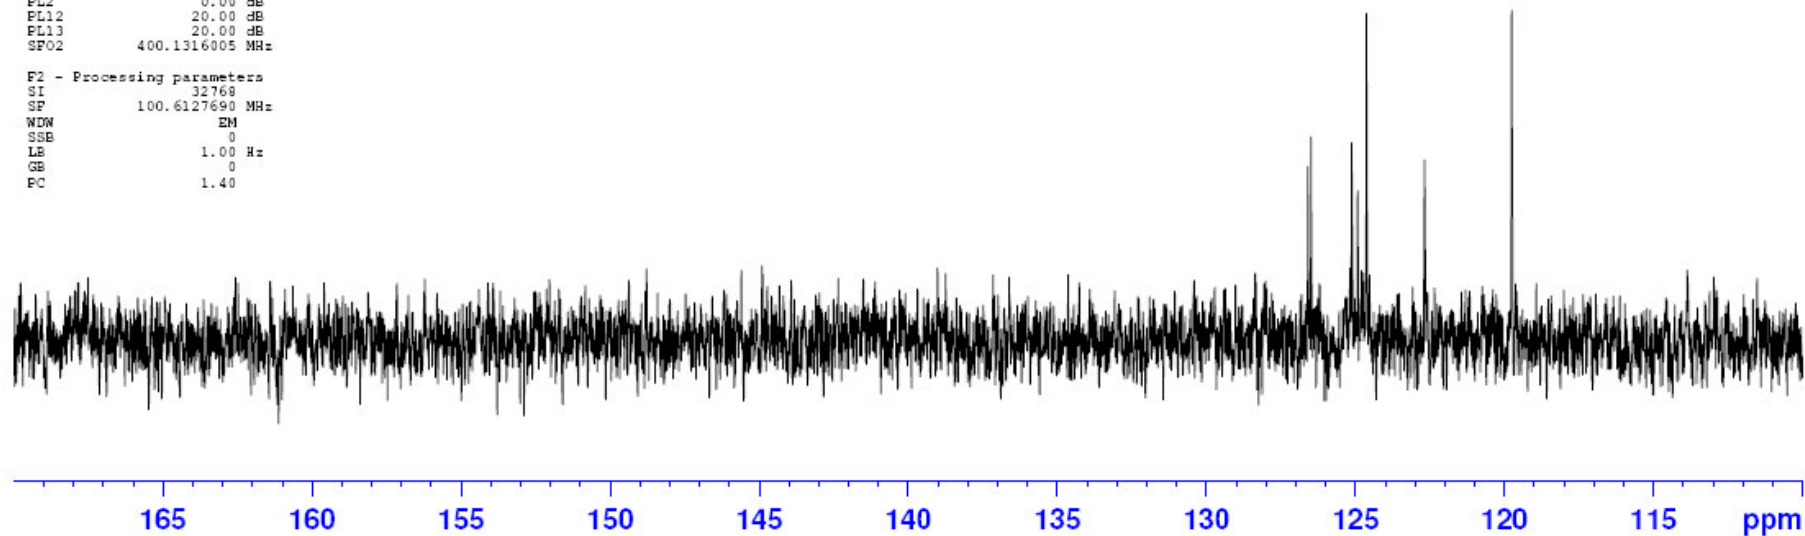

Sample Ref 001-DA-029-01  
4-nitro coupling

Current Data Parameters  
NAME dal-26-09-2008-7  
EXPNO 15  
PROCNO 1

F2 - Acquisition Parameters  
Date\_ 20080927  
Time 20.26  
INSTRUM spect  
PROBHD 5 mm PABBO BBO  
PULPROG invgprndg  
TD 1024  
SOLVENT cdcl3  
NS 8  
DS 16  
SWH 4432.624 Hz  
FIDRES 4.328734 Hz  
AQ 0.1155572 sec  
RG 16384  
RW 112.800 usec  
DE 6.00 usec  
TE 300.0 K  
d0 0.00000300 sec  
d1 1.48013401 sec  
d6 0.07100000 sec  
d13 0.00000400 sec  
d16 0.00010000 sec  
IN0 0.00002240 sec

----- CHANNEL f1 -----  
NUC1 1H  
P1 7.68 usec  
PL1 15.76 usec  
FL1 0.00 dB  
SFO1 400.132235 MHz

----- CHANNEL f2 -----  
NUC2 13C  
P2 7.65 usec  
PL2 0.00 dB  
SFO2 100.6227746 MHz

----- GRADIENT CHANNEL -----  
GPNAM1 SINE.100  
GPNAM2 SINE.100  
GPNAM3 SINE.100  
GPE1 50.00 %  
GPE2 30.00 %  
GPE3 40.10 %  
F16 1000.00 usec

F1 - Acquisition parameters  
ND0 2  
TD 128  
SFO1 100.6228 MHz  
FIDRES 174.386154 Hz  
SW 221.833 ppm  
F0MODE QF

F2 - Processing parameters  
SI 1024  
SF 400.1299787 MHz  
WDW SINE  
SSB 0  
LB 0.00 Hz  
GB 0  
PC 1.40

F1 - Processing parameters  
SI 1024  
MC2 QF  
SF 100.6127690 MHz  
WDW SINE  
SSB 0  
LB 0.00 Hz  
GB 0

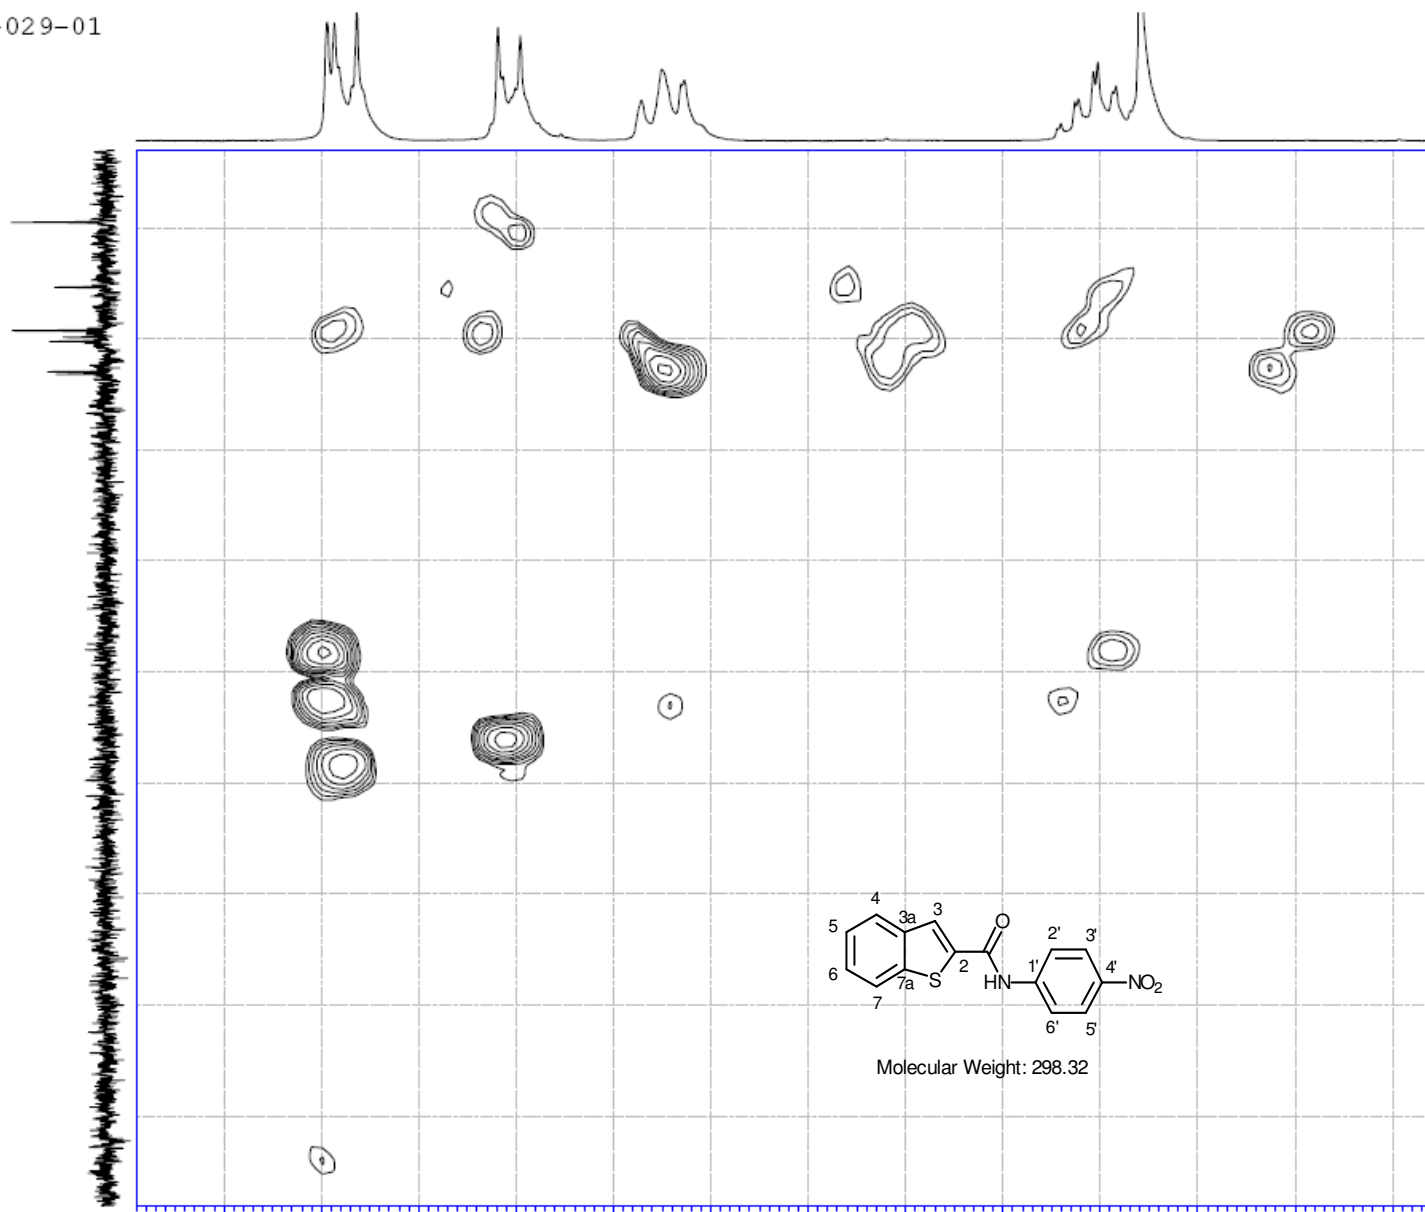



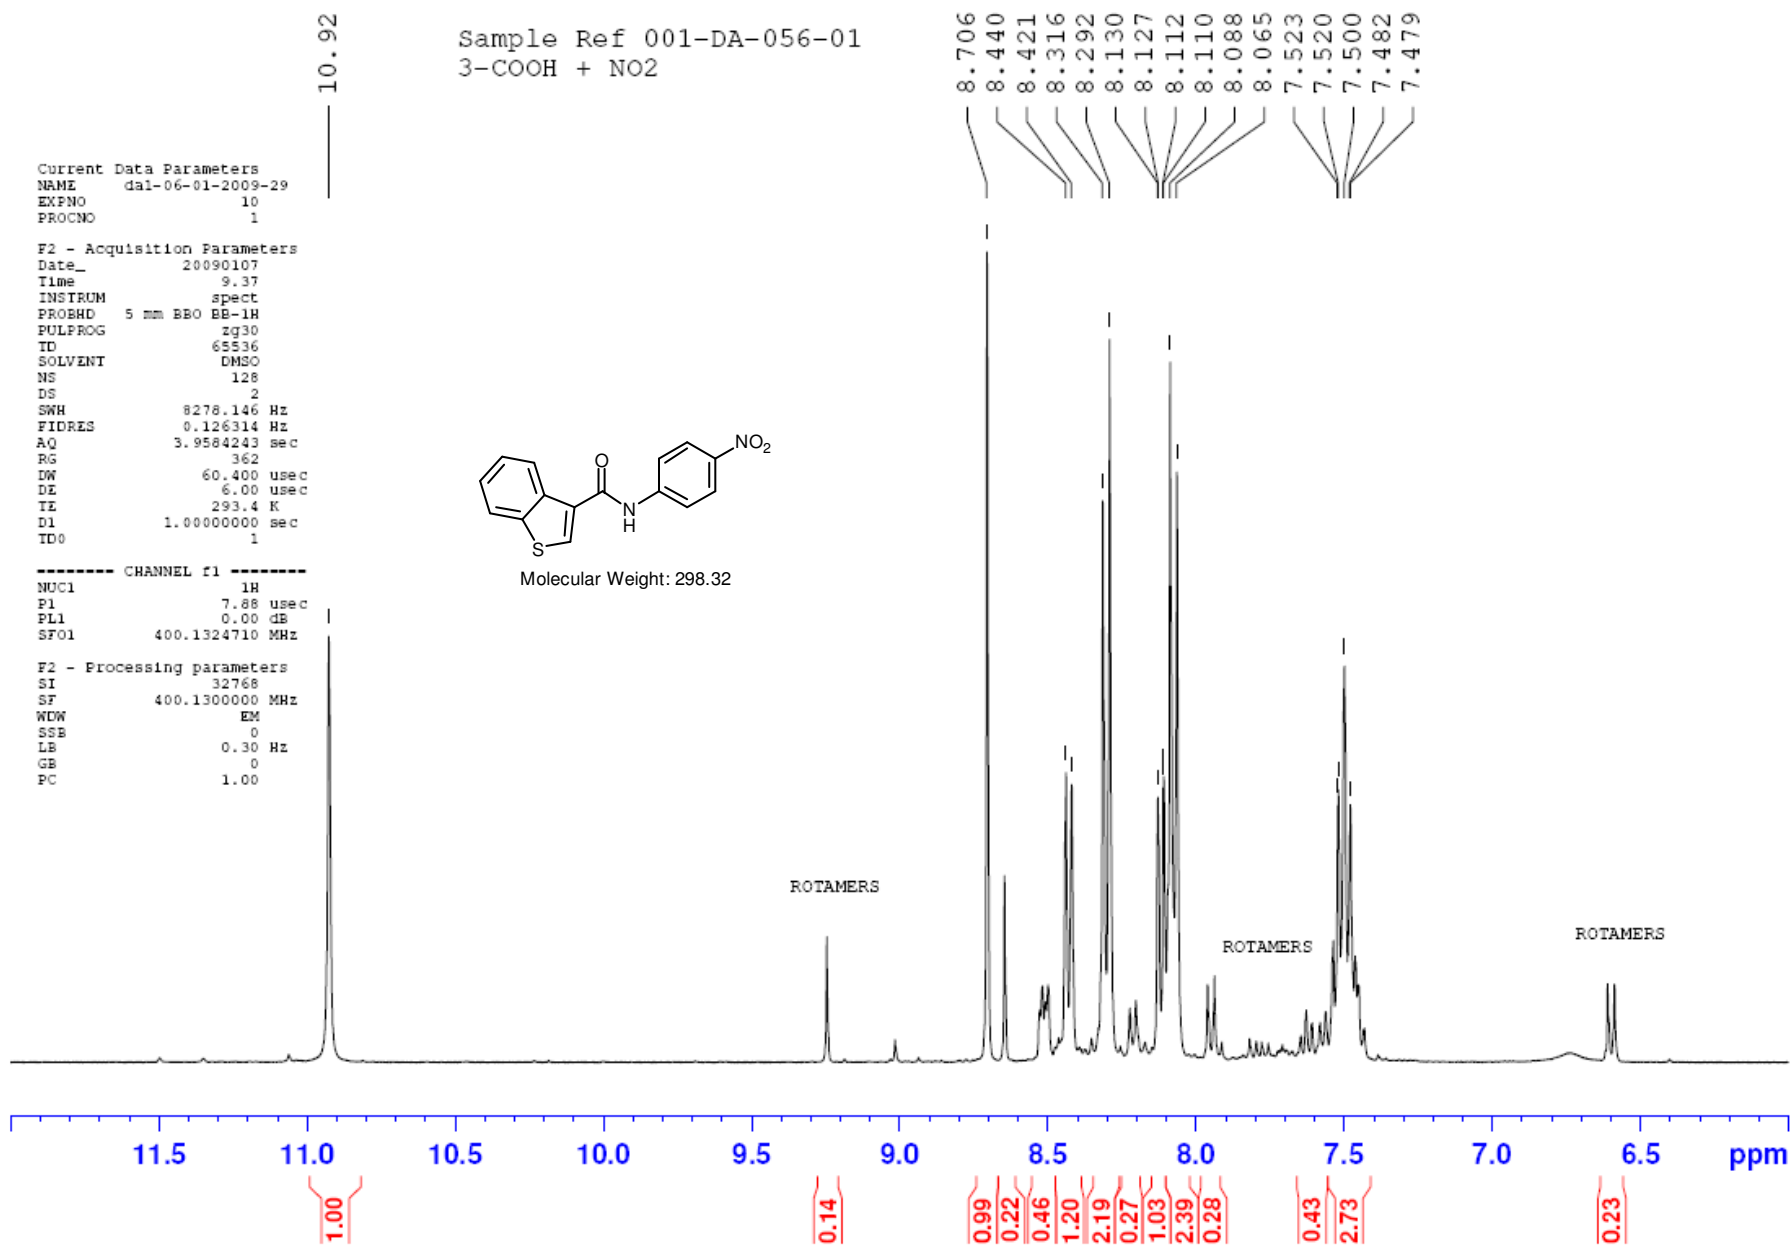

Sample Ref 001-DA-056-01  
3-COOH + NO2

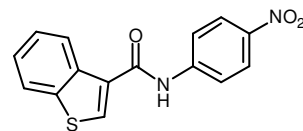

Molecular Weight: 298.32

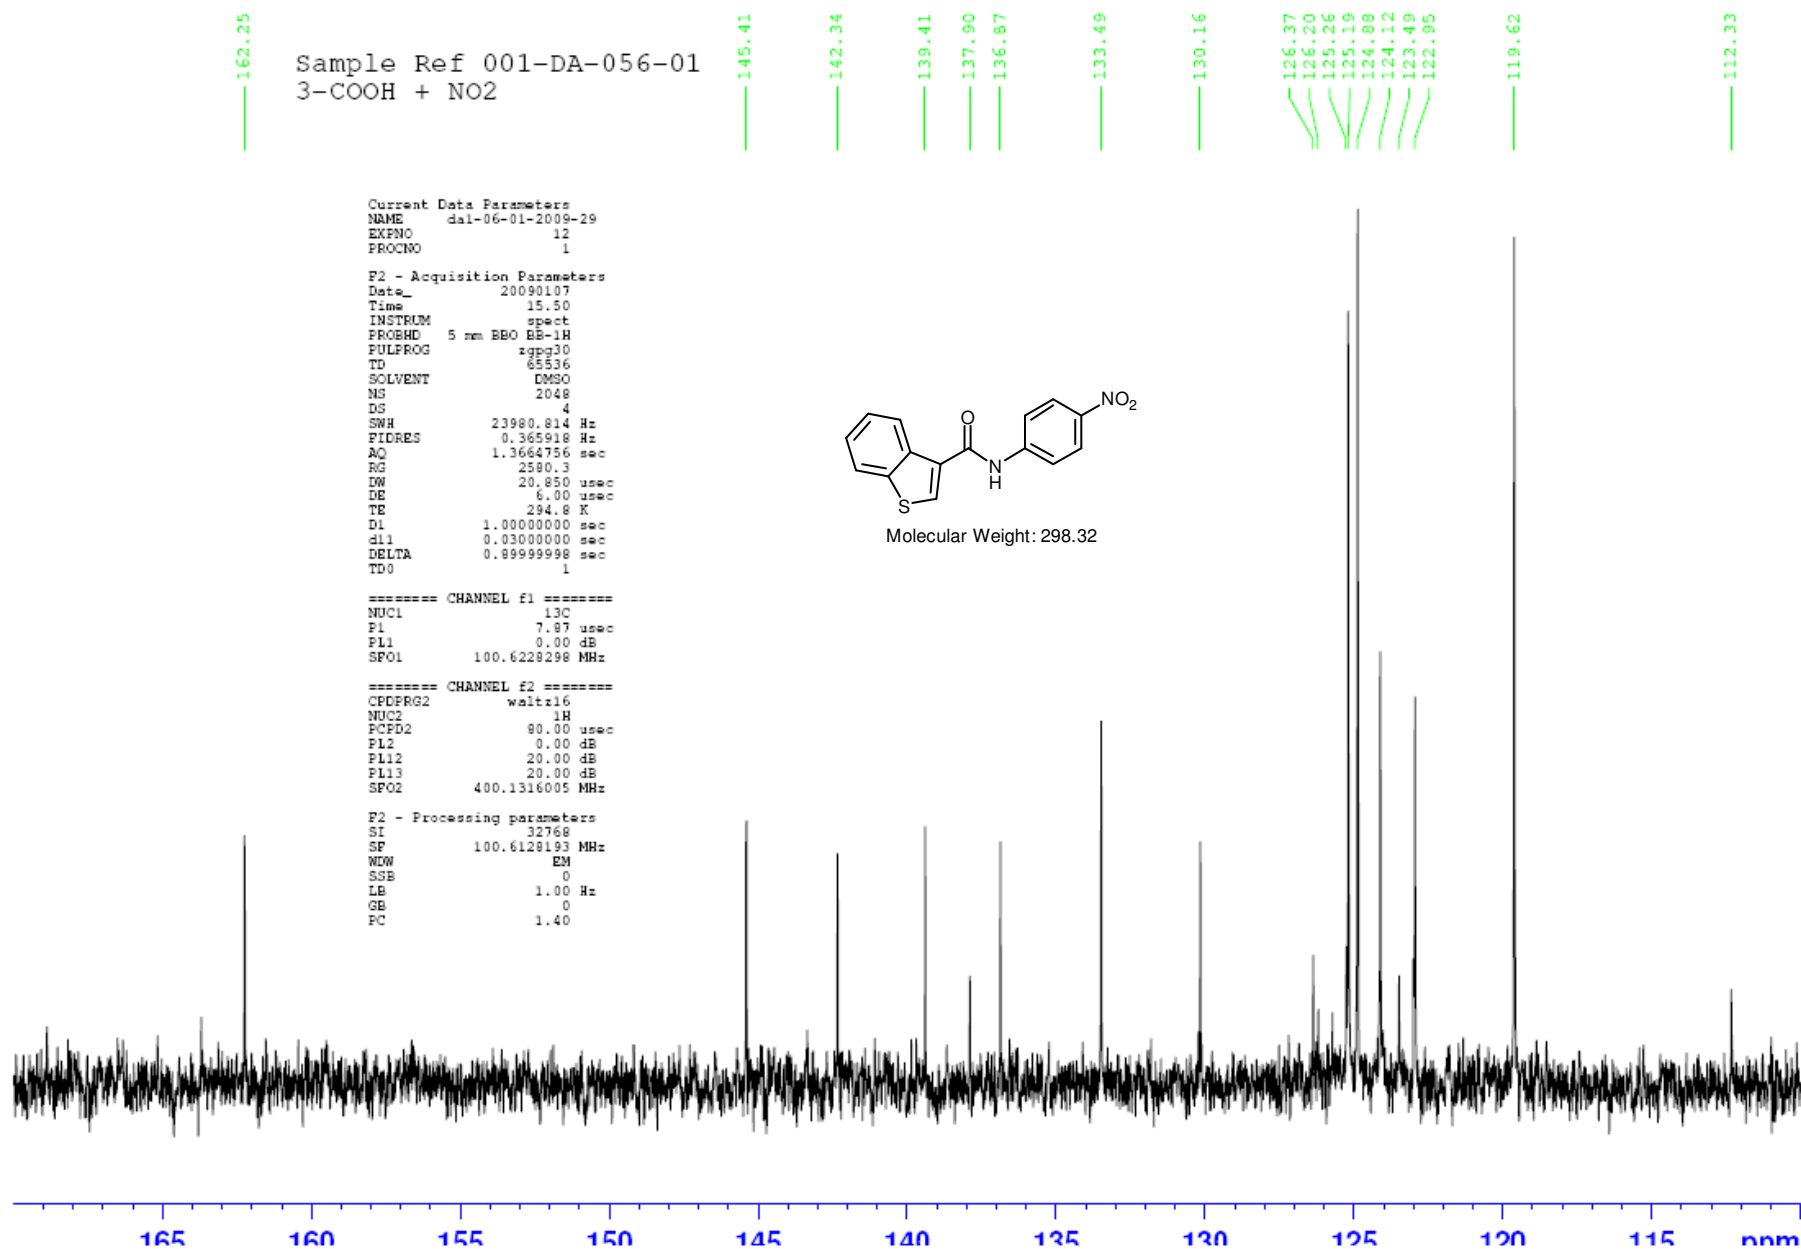

Sample Ref 001-DA-056-01  
3-COOH + NO2

Current Data Parameters  
NAME dal-06-01-2009-29  
EXPNO 16  
PROCNO 1

F2 - Acquisition Parameters  
Date\_ 20090107  
Time 19.11  
INSTRUM spect  
PROBHD 5 mm BBO BB-1H  
PULPROG noesyph  
TD 2048  
SOLVENT DMSO  
NS 4  
DS 4  
SWH 5555.556 Hz  
FIDRES 2.712674 Hz  
AQ 0.1843700 sec  
RG 256  
DW 90.000 usec  
DE 6.00 usec  
TE 293.8 K  
d0 0.00007997 sec  
D1 1.33188999 sec  
D8 0.80000001 sec  
IN0 0.00018000 sec  
STICNT 128

----- CHANNEL f1 -----  
NUC1 1H  
P1 7.88 usec  
PL1 0.00 dB  
SFO1 400.1327909 MHz

F1 - Acquisition parameters  
ND0 1  
TD 256  
SFO1 400.1328 MHz  
FIDRES 21.701389 Hz  
SW 13.884 ppm  
PnMODE States-TPPI

F2 - Processing parameters  
SI 1024  
SF 400.1300000 MHz  
WDW QSINE  
SSB 2  
LB 0.00 Hz  
GB 0  
PC 1.00

F1 - Processing parameters  
SI 1024  
MC2 States-TPPI  
SF 400.1300000 MHz  
WDW QSINE  
SSB 2  
LB 0.00 Hz  
GB 0

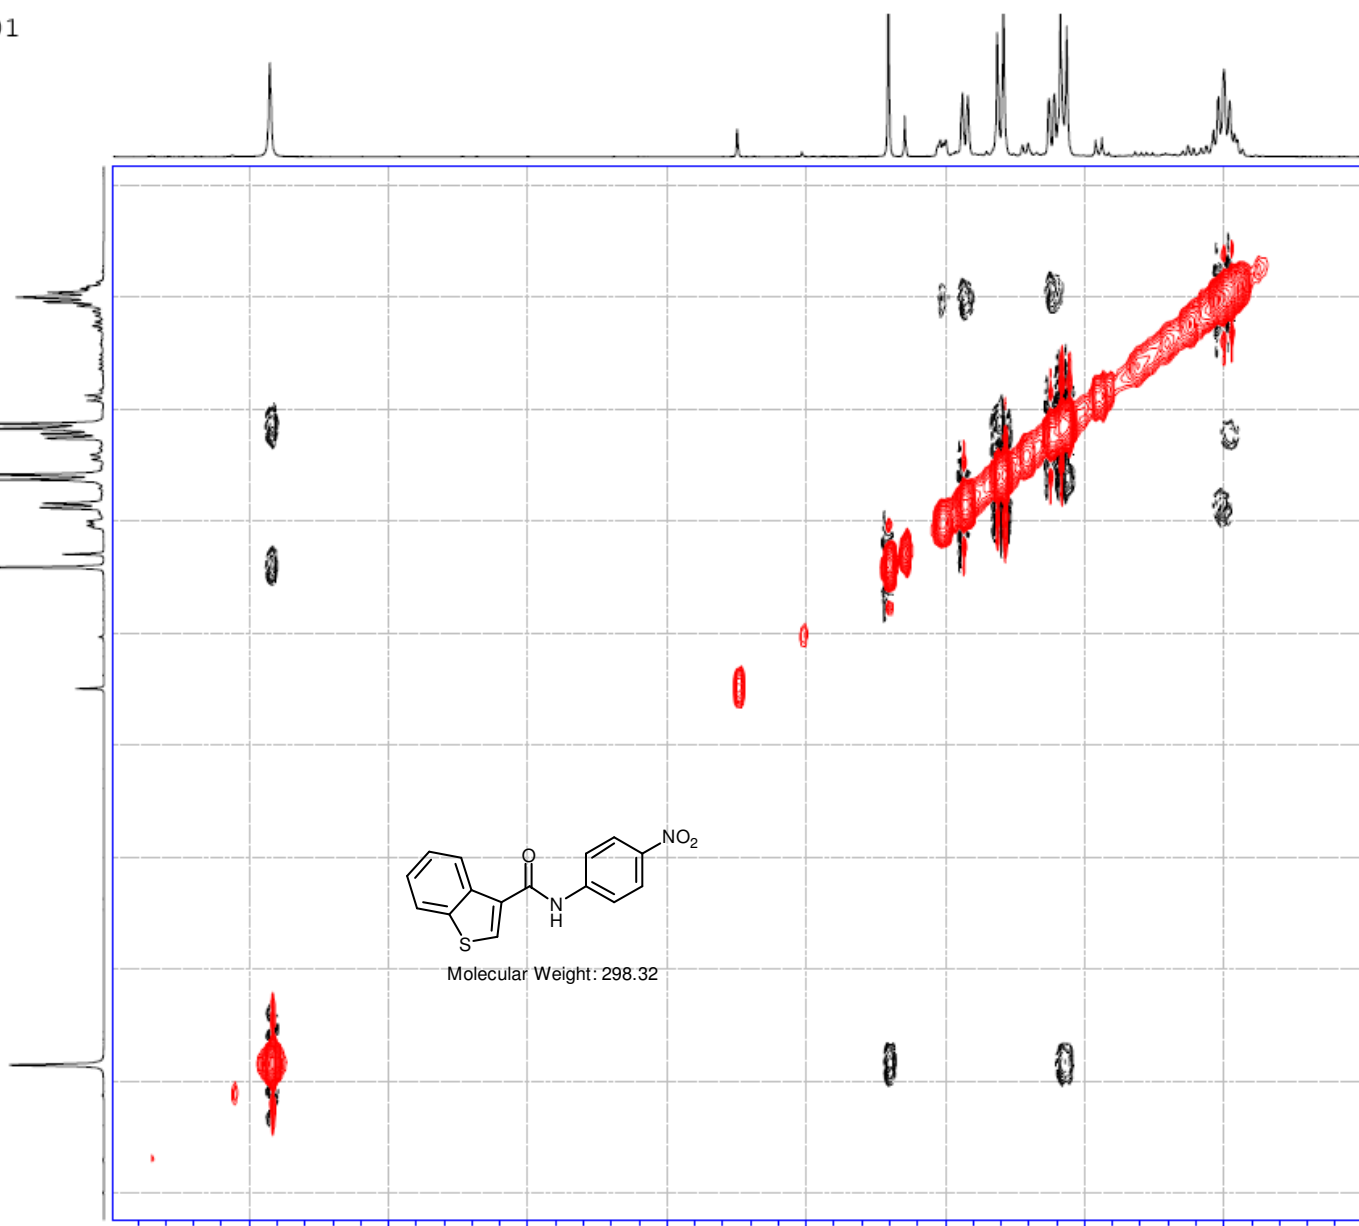

10.92

Sample Ref 001-DA-055-01  
5-COOH + NO2

8.784  
8.781  
8.553  
8.550  
8.301  
8.278  
8.211  
8.190  
8.114  
8.096  
8.091  
7.988  
7.974  
7.965  
7.961  
7.944  
7.940  
7.933  
7.919  
7.713  
7.699  
7.644  
7.630

Current Data Parameters  
NAME dal-05-01-2009-1  
EXPNO 20  
PROCNO 1

F2 - Acquisition Parameters  
Date\_ 20090105  
Time 11.34  
INSTRUM spect  
PROBHD 5 mm BBO BB-1H  
PULPROG zg30  
TD 65536  
SOLVENT DMSO  
NS 64  
DS 2  
SWH 9278.146 Hz  
FIDRES 0.126314 Hz  
AQ 3.9584243 sec  
RG 287.4  
DN 60.400 usec  
DE 6.00 usec  
TE 292.2 K  
D1 1.00000000 sec  
TD0 1

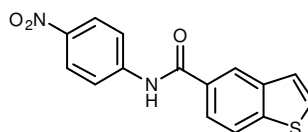

Molecular Weight: 298.32

===== CHANNEL f1 =====  
NUC1 1H  
P1 7.88 usec  
PL1 0.00 dB  
SFO1 400.1324710 MHz

F2 - Processing parameters  
SI 32768  
SF 400.1300031 MHz  
WDW EM  
SSB 0  
LB 0.30 Hz  
GB 0  
PC 1.00

ROTAMER

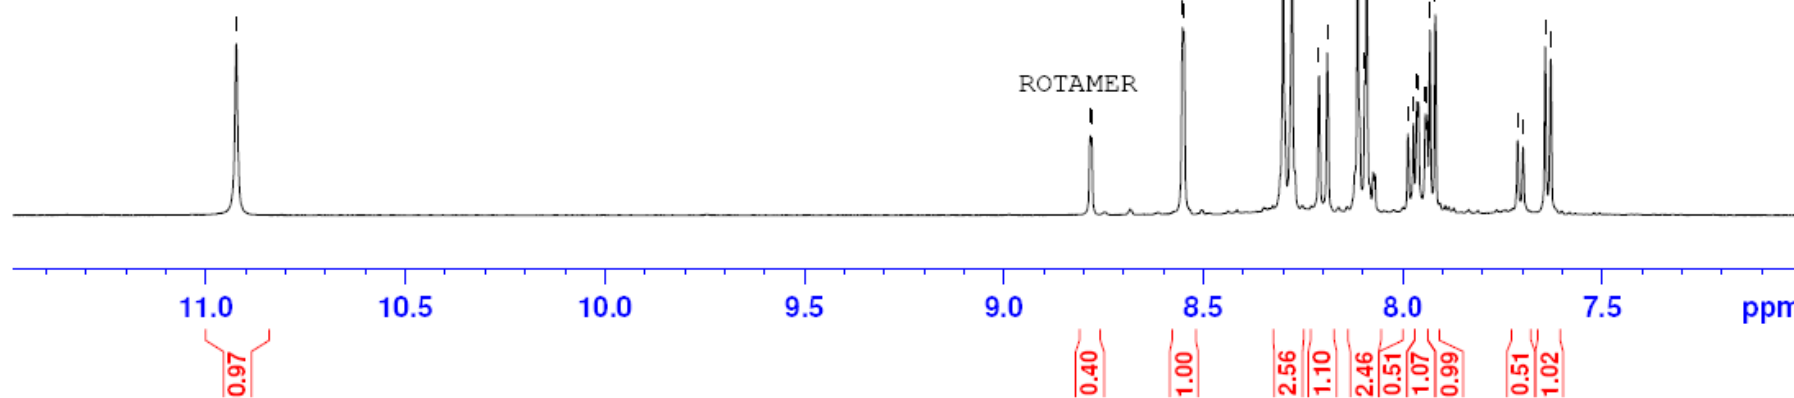

166.40

162.87

Sample Ref 001-DA-055-01  
5-COOH + NO2

145.60  
145.45142.63  
142.38139.62  
139.12130.50  
129.94  
129.26126.69  
124.81  
124.71  
124.46  
124.24  
123.56  
123.37  
122.74

119.79

Current Data Parameters  
NAME dal-05-01-2009-1  
EXPNO 22  
PROCNO 1

F2 - Acquisition Parameters  
Date\_ 20090105  
Time 14.36  
INSTRUM spect  
PROBHD 5 mm BBO BB-1H  
PULPROG zgpg30  
TD 65536  
SOLVENT DMSO  
NS 2048  
DS 4  
SWH 23980.914 Hz  
FIDRES 0.365918 Hz  
AQ 1.3664756 sec  
RG 2896.3  
DW 20.950 usec  
DE 6.00 usec  
TE 294.4 K  
D1 1.00000000 sec  
d11 0.03000000 sec  
DELTA 0.99999998 sec  
TD0 1

===== CHANNEL f1 =====  
NUC1 13C  
P1 7.87 usec  
PL1 0.00 dB  
SFO1 100.6226298 MHz

===== CHANNEL f2 =====  
CPDPRG2 waltz16  
NUC2 1H  
PCPD2 80.00 usec  
PL2 0.00 dB  
PL12 20.00 dB  
PL13 20.00 dB  
SFO2 400.1316005 MHz

F2 - Processing parameters  
SI 32768  
SF 100.6128193 MHz  
WDW EM  
SSB 0  
LB 1.00 Hz  
GB 0  
PC 1.40

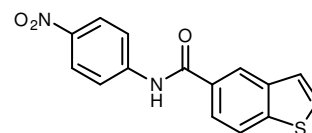

Molecular Weight: 298.32

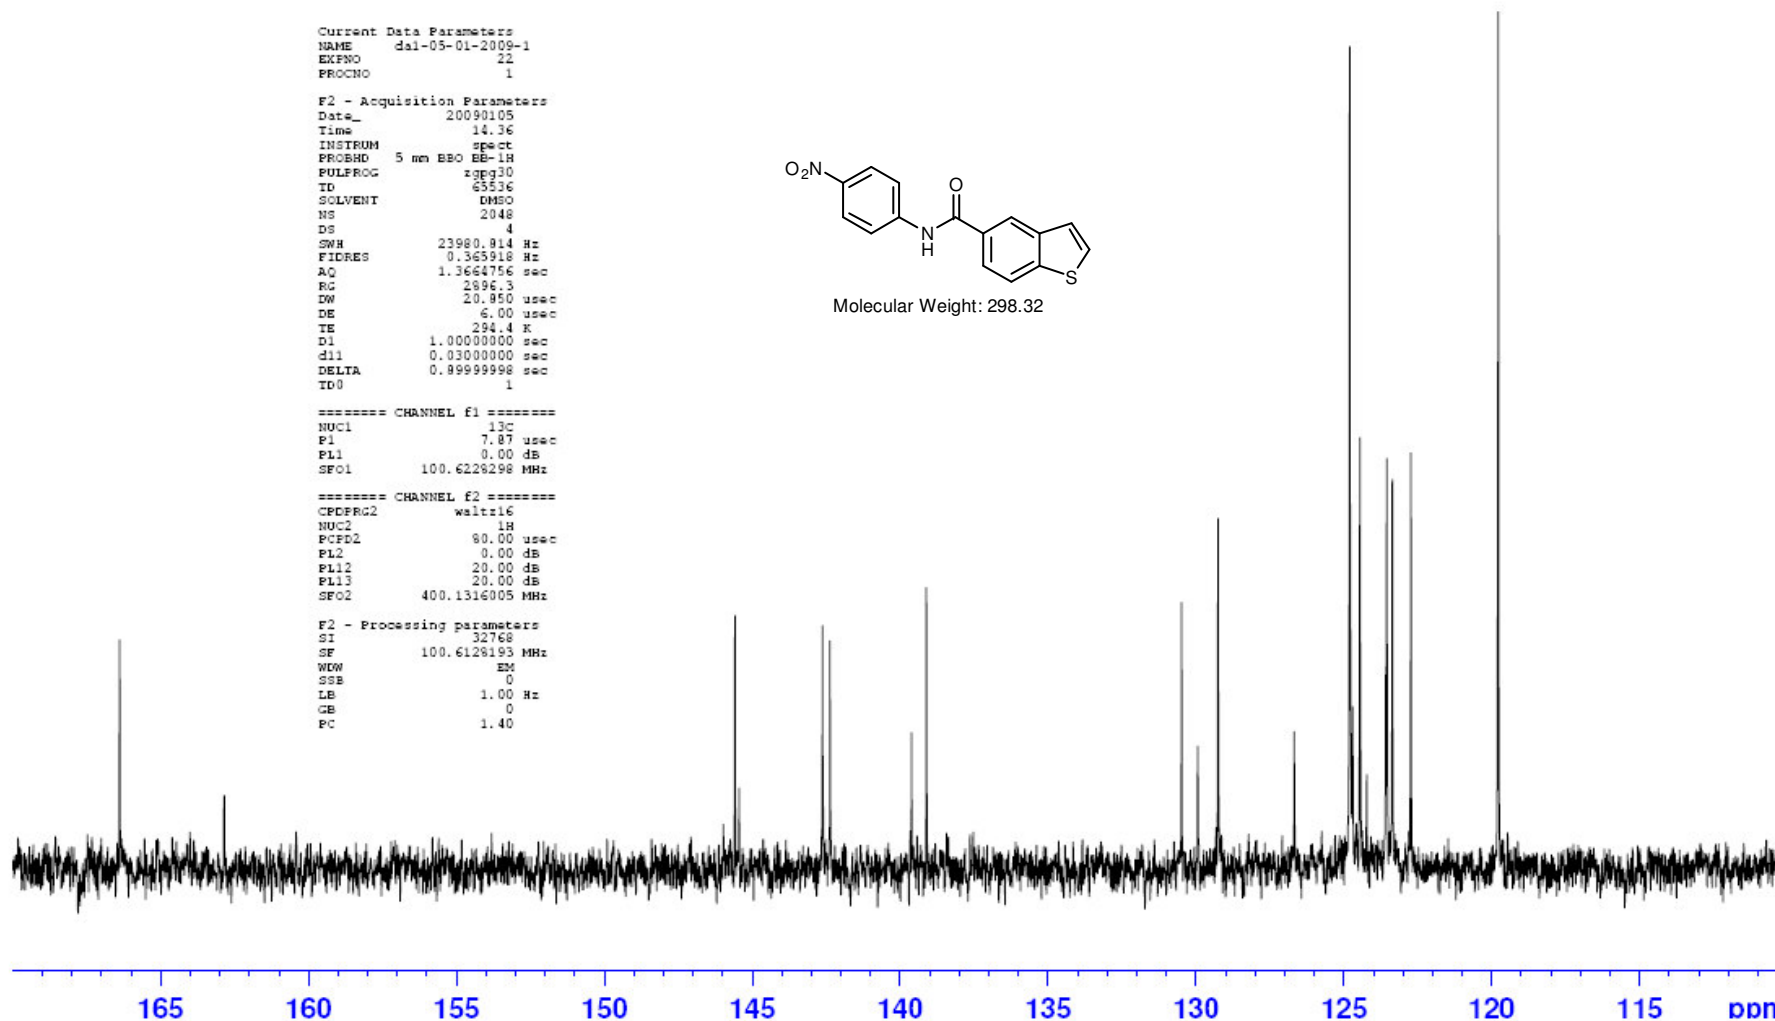

Sample Ref 001-DA-055-01  
5-COOH + NO2

Current Data Parameters  
NAME dal-05-01-2009-1  
EXPNO 26  
PROCNO 1

F2 - Acquisition Parameters  
Date\_ 20090105  
Time\_ 16.36  
INSTRUM spect  
PROBHD 5 mm BBO BB-1H  
PULPROG noesyph  
TD 2048  
SOLVENT DMSO  
NS 4  
DS 4  
SWH 4708.098 Hz  
FIDRES 2.298876 Hz  
AQ 0.2175476 sec  
RG 181  
DW 106.200 usec  
DE 6.00 usec  
TE 293.3 K  
d0 0.00009617 sec  
D1 1.29912198 sec  
D8 0.80000001 sec  
INO 0.00021240 sec  
STICNT 128

----- CHANNEL f1 -----  
NUC1 1H  
P1 7.88 usec  
PL1 0.00 dB  
SFO1 400.1323434 MHz

F1 - Acquisition parameters  
ND0 1  
TD 256  
SFO1 400.1323 MHz  
FIDRES 18.391008 Hz  
SW 11.766 ppm  
FnMODE States-TPPI

F2 - Processing parameters  
SI 1024  
SF 400.1300352 MHz  
WDW QSINE  
SSB 2  
LB 0.00 Hz  
GB 0  
PC 1.00

F1 - Processing parameters  
SI 1024  
MC2 States-TPPI  
SF 400.1300352 MHz  
WDW QSINE  
SSB 2  
LB 0.00 Hz  
GB 0

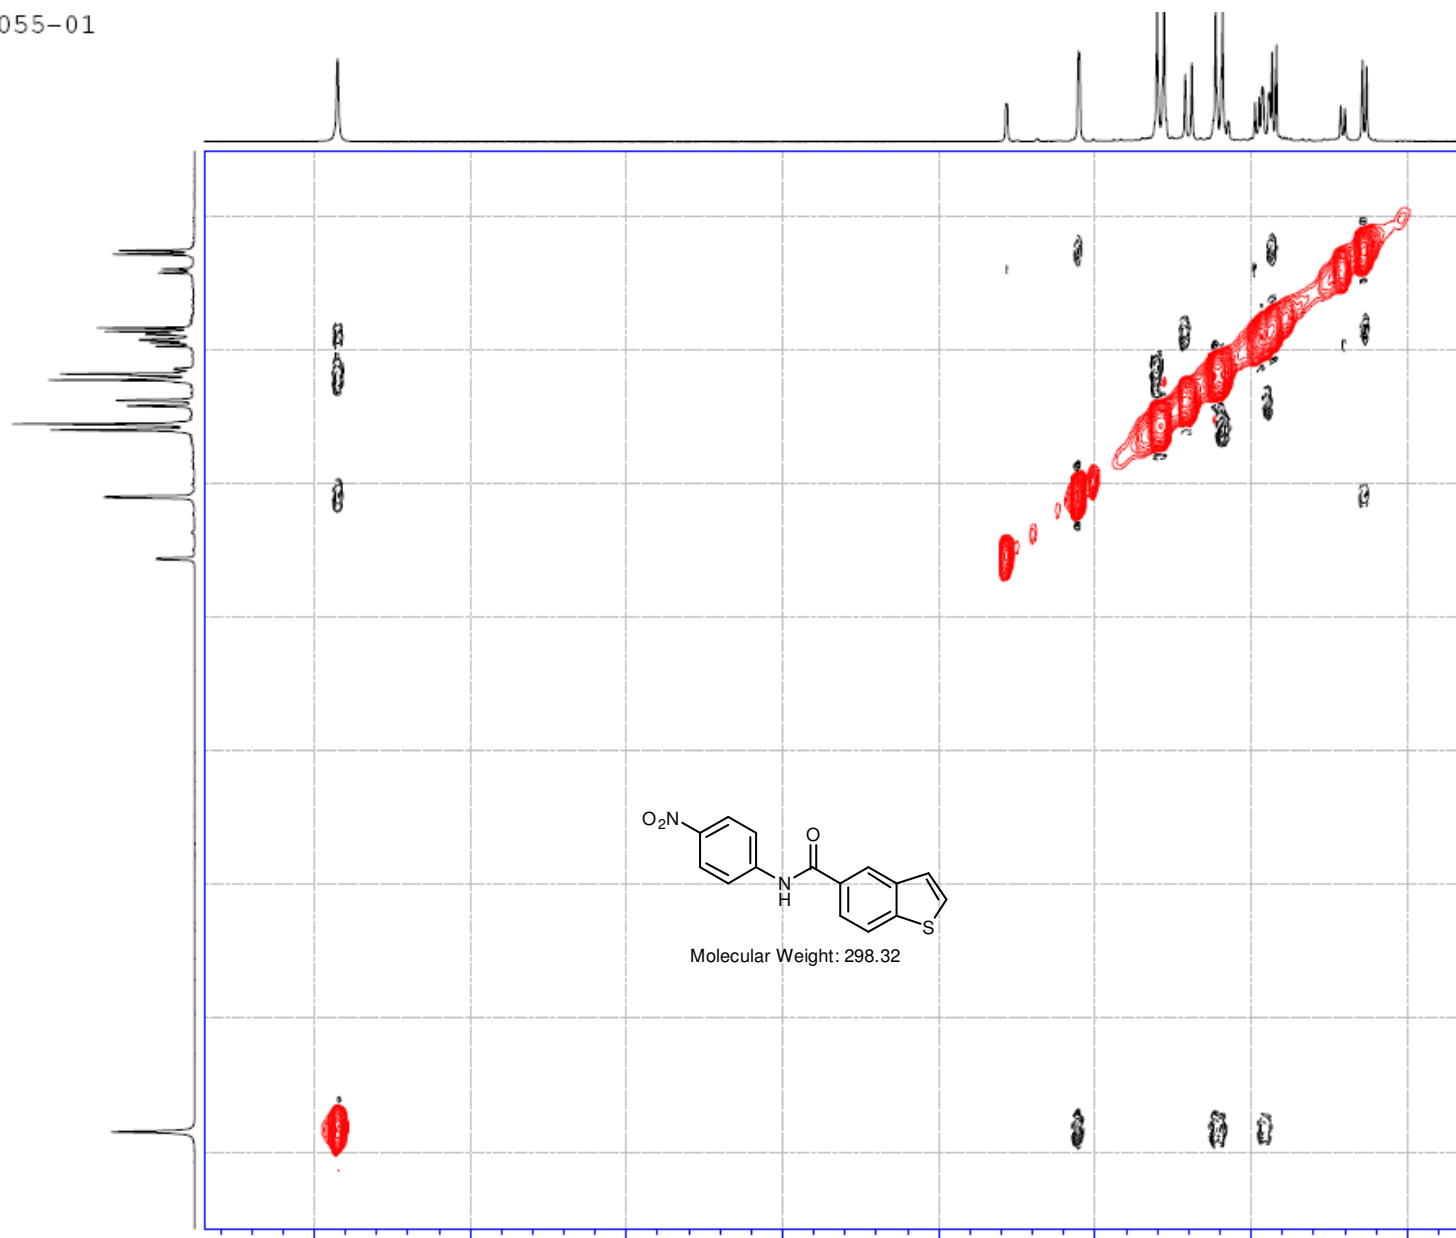

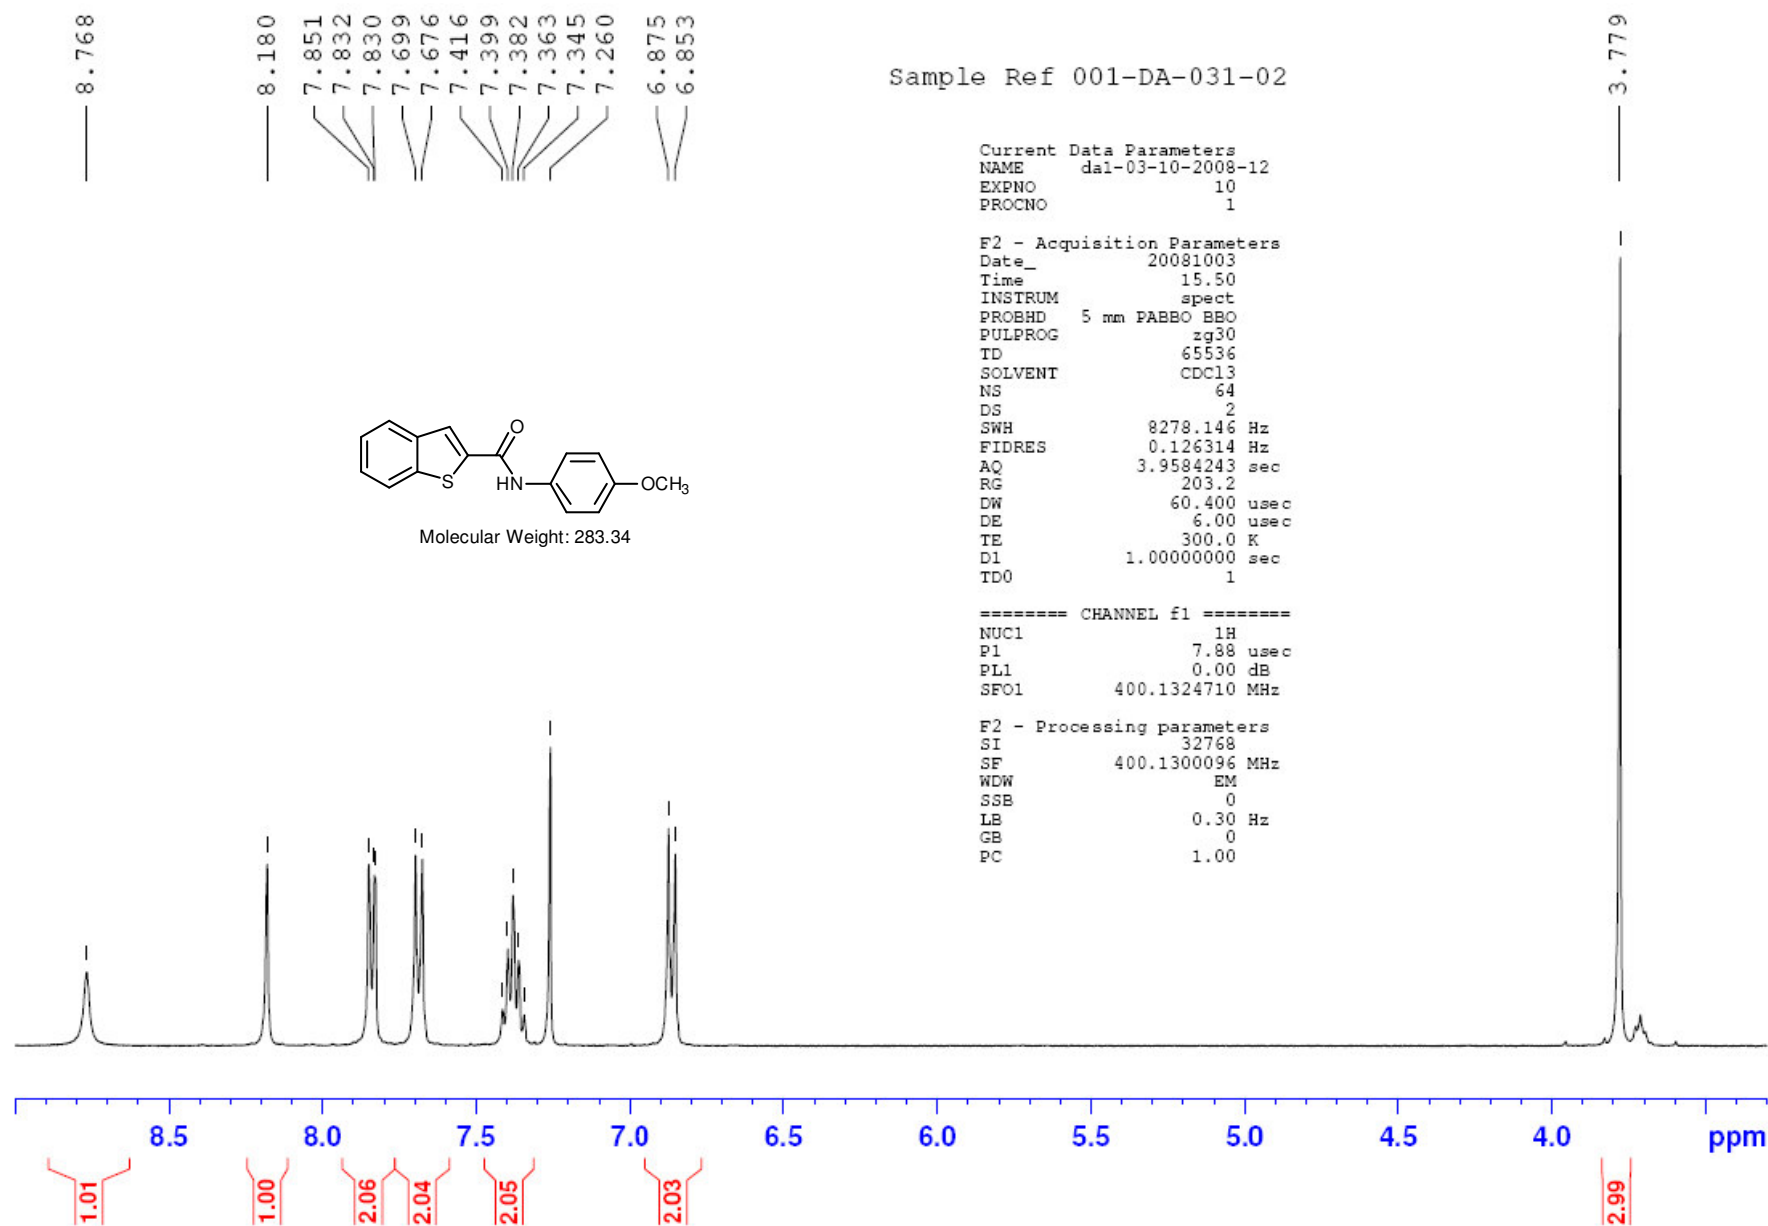

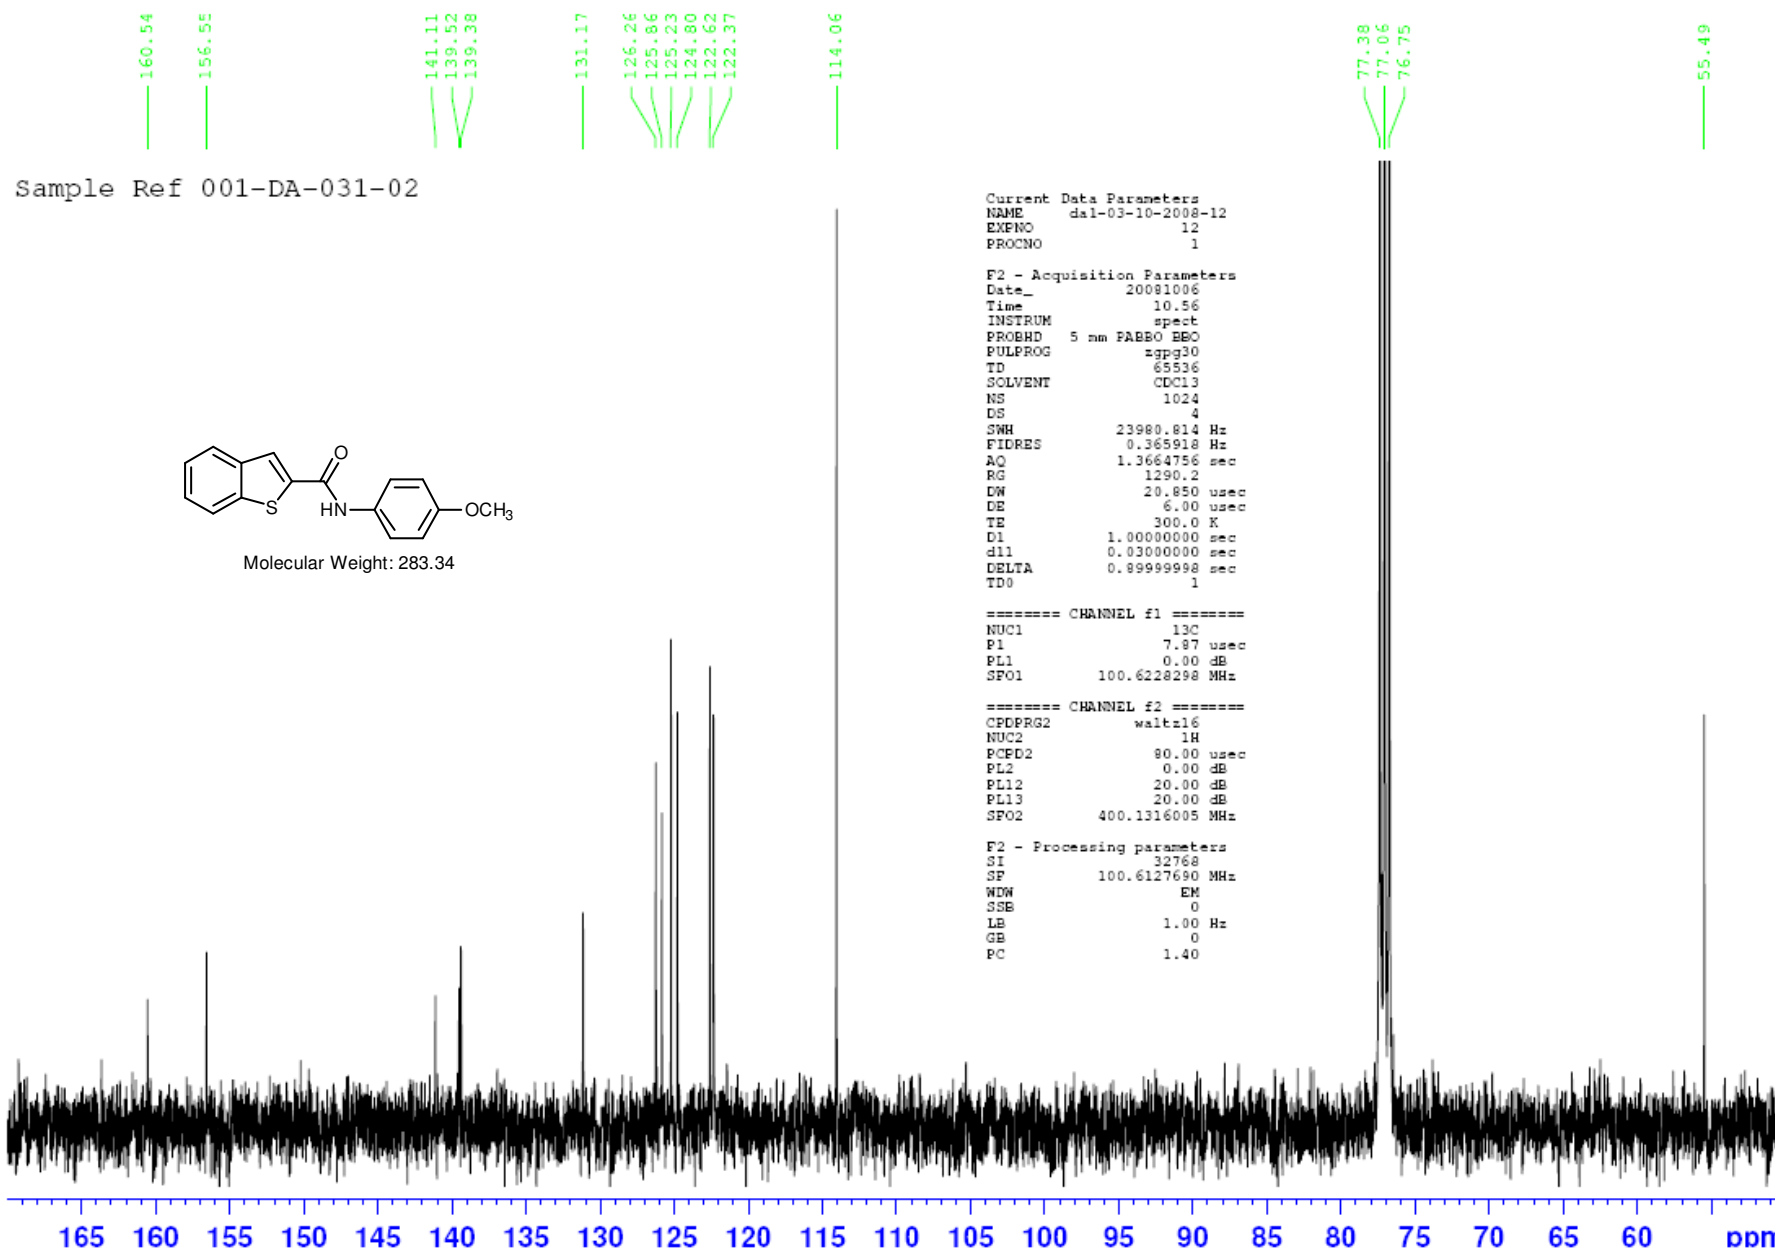



Sample Ref S1C18

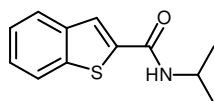

Molecular Weight: 219.3

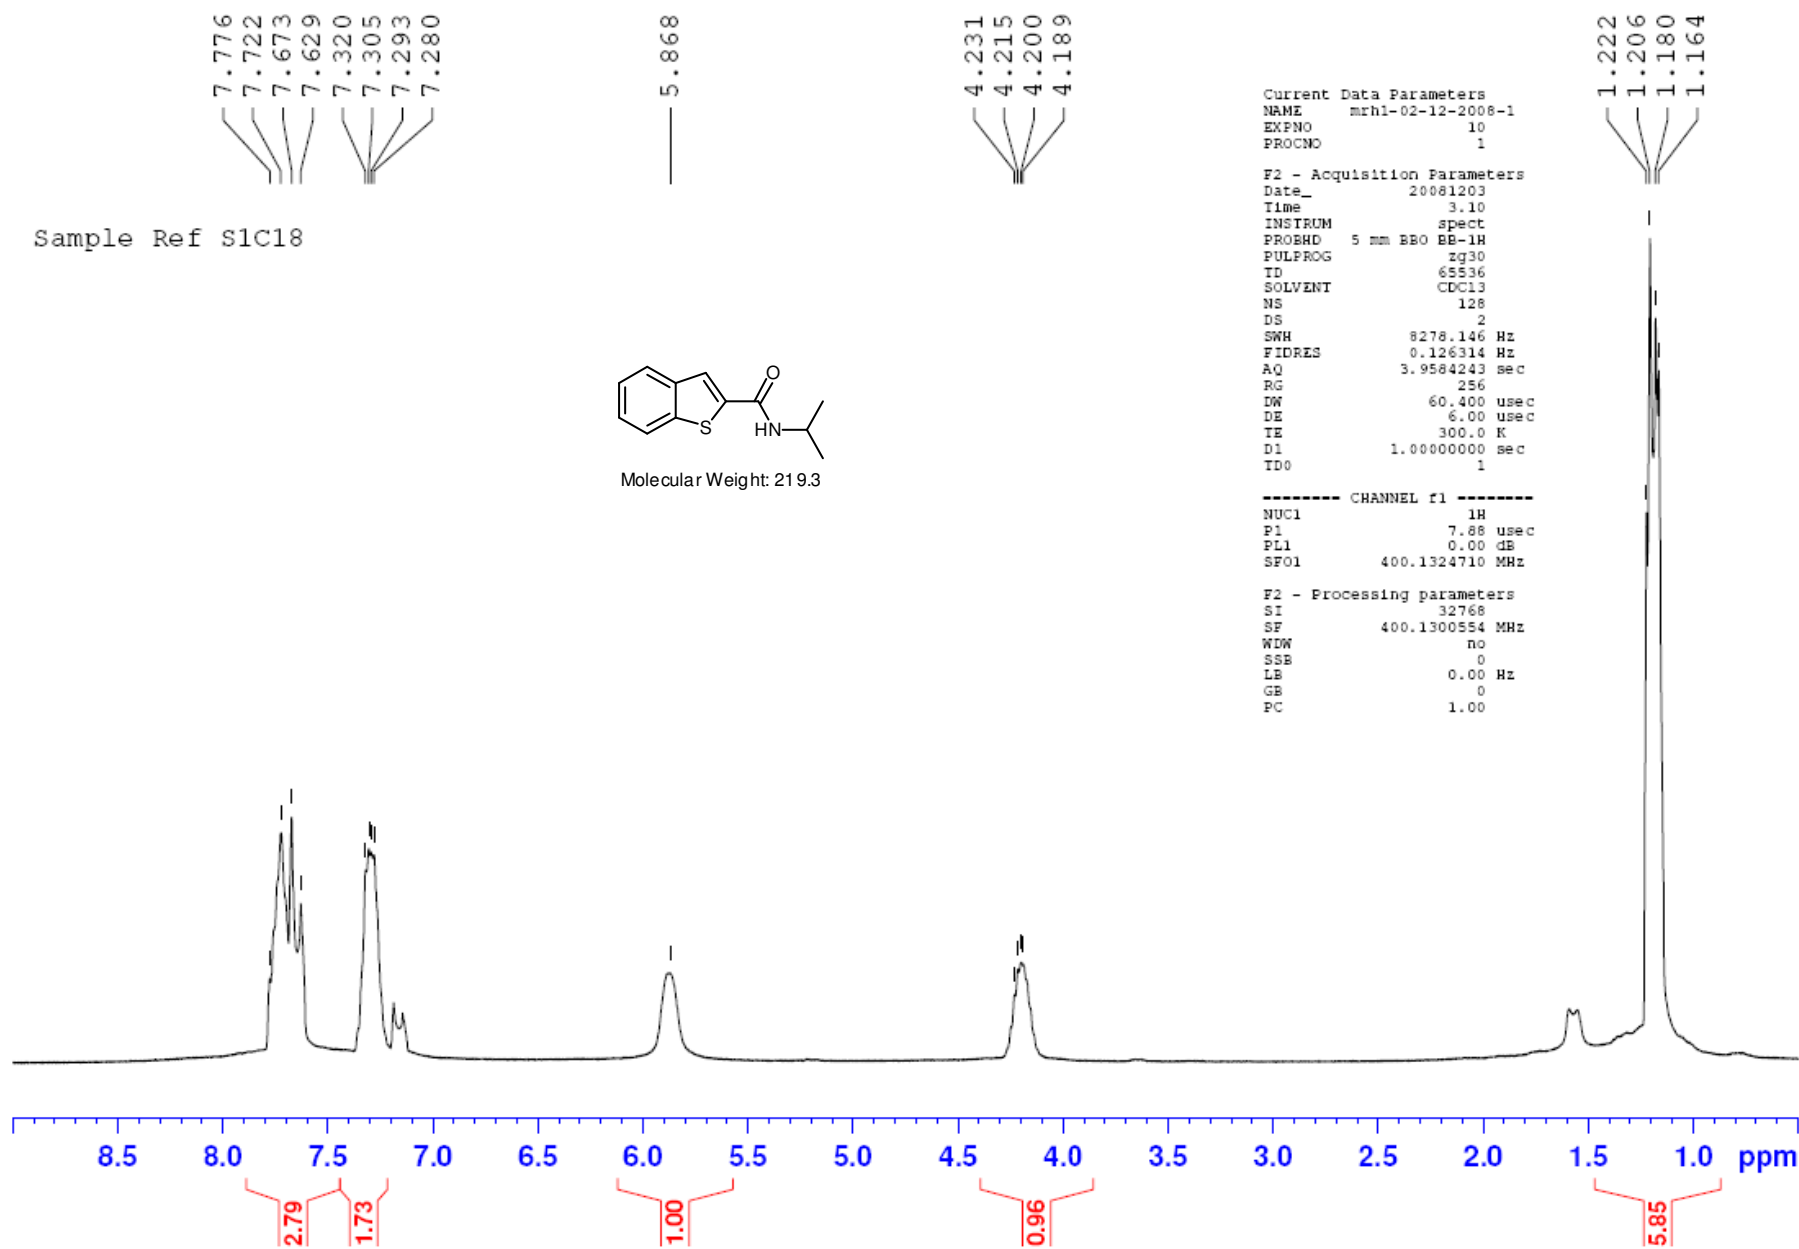

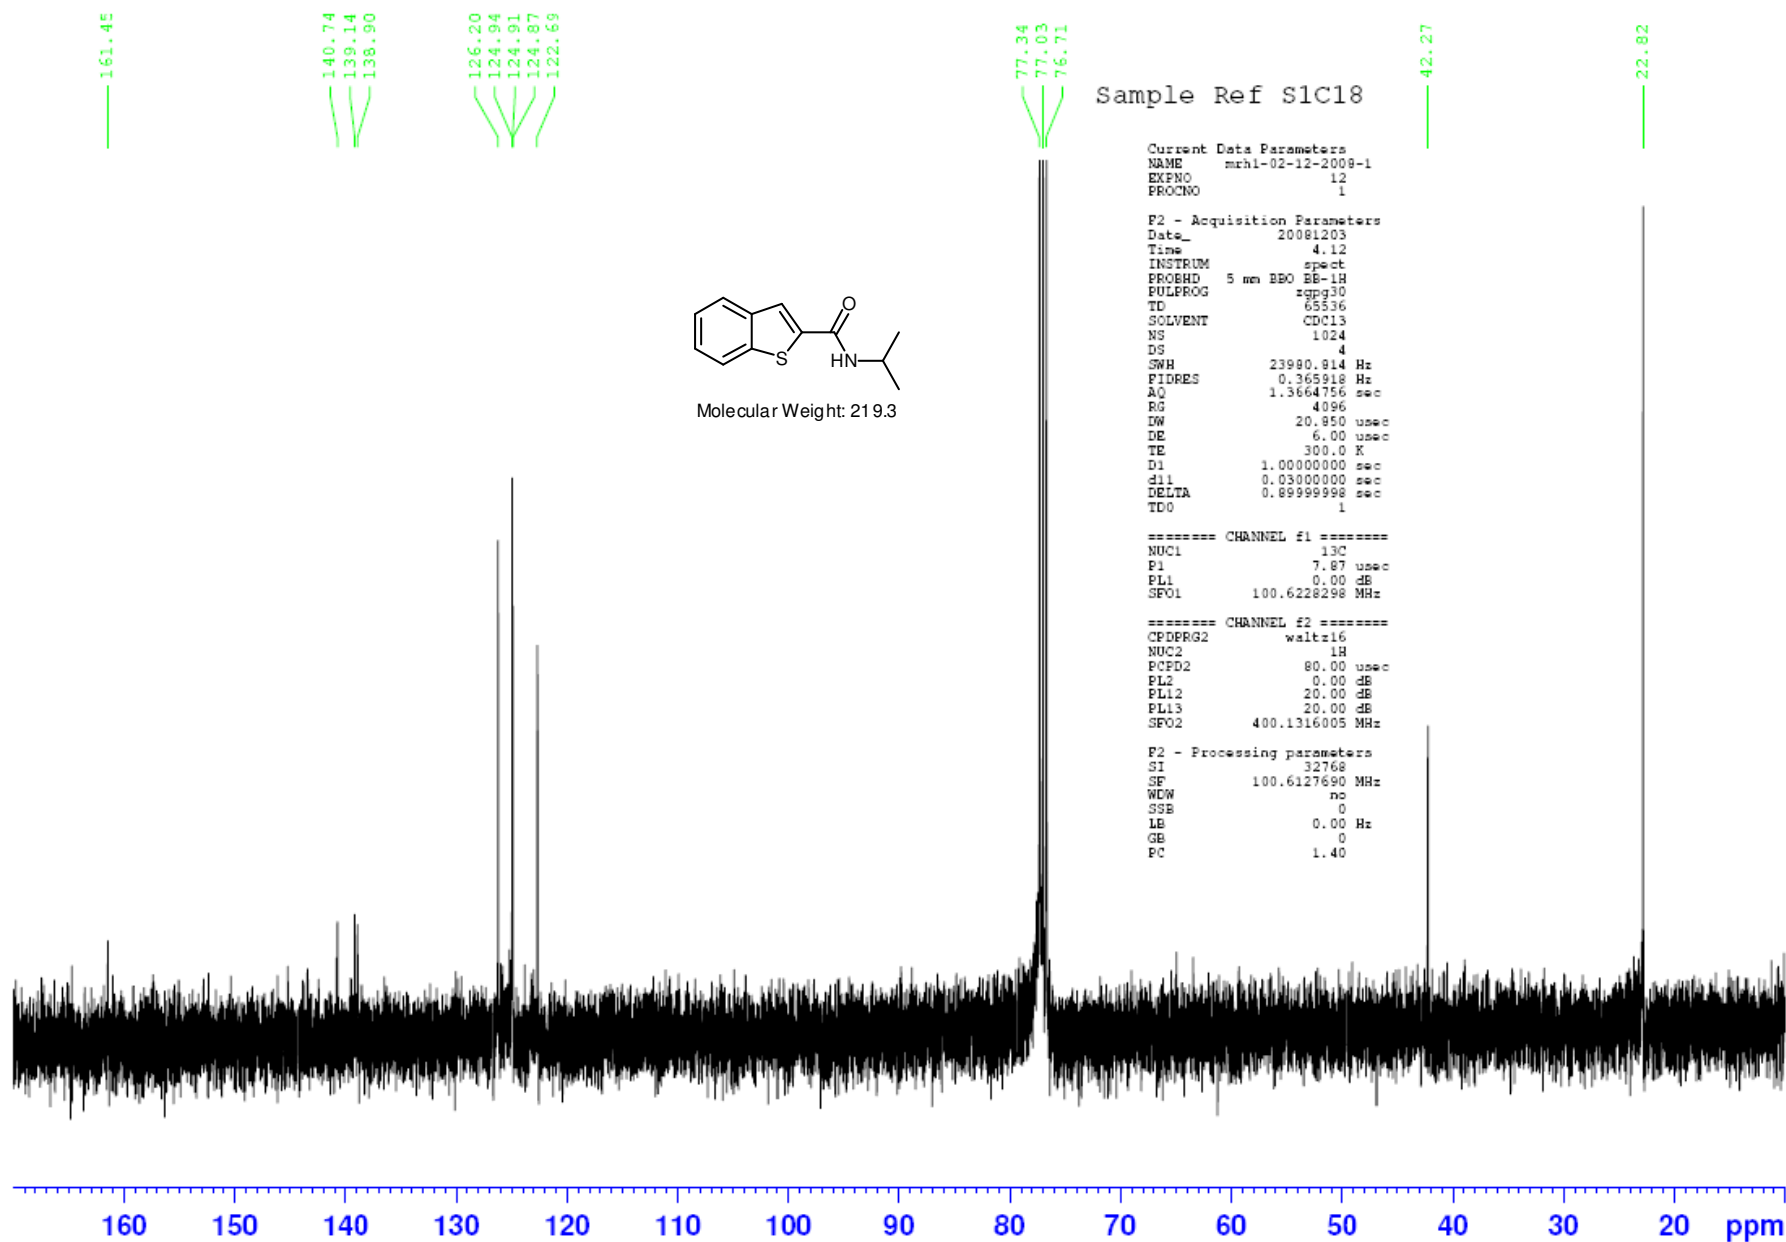

Sample Ref 026-TM-034-03 amidation

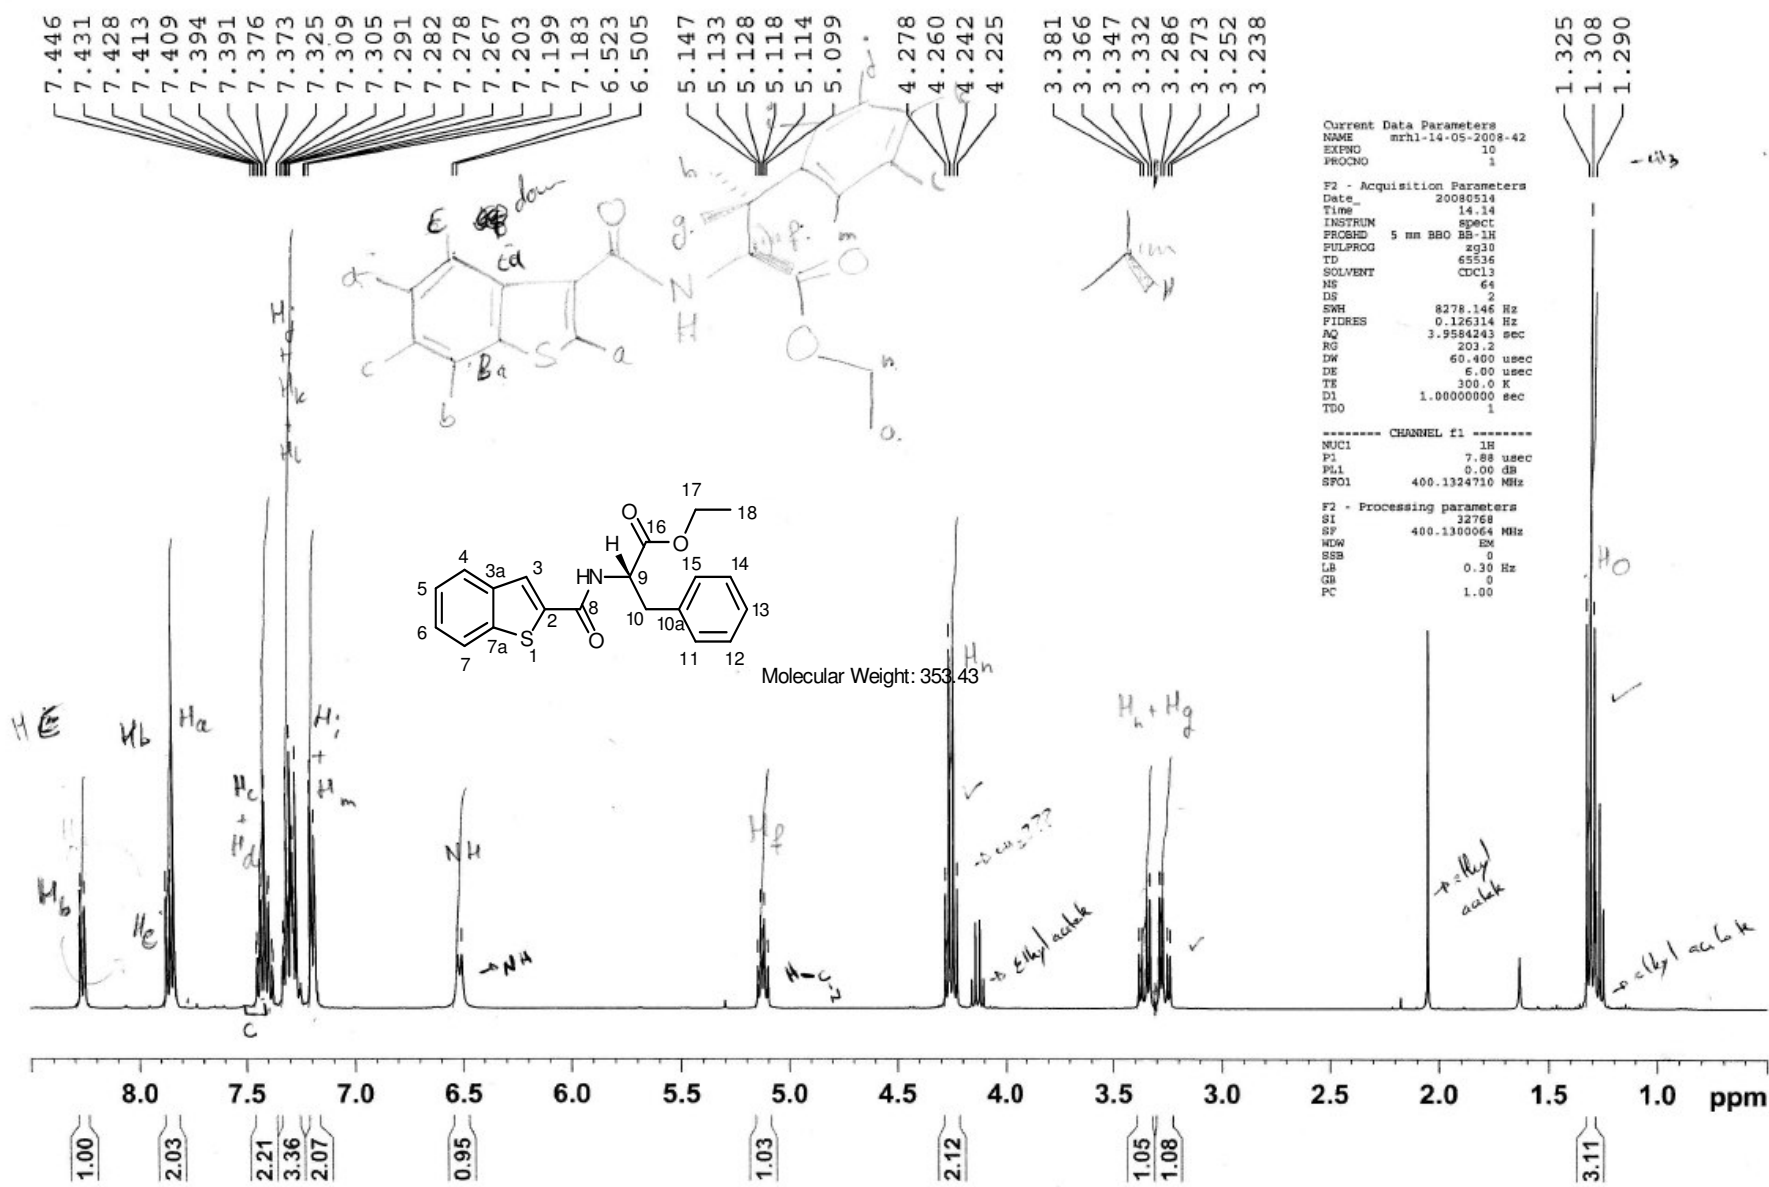

Sample Ref 026-TM-034-03 amidation

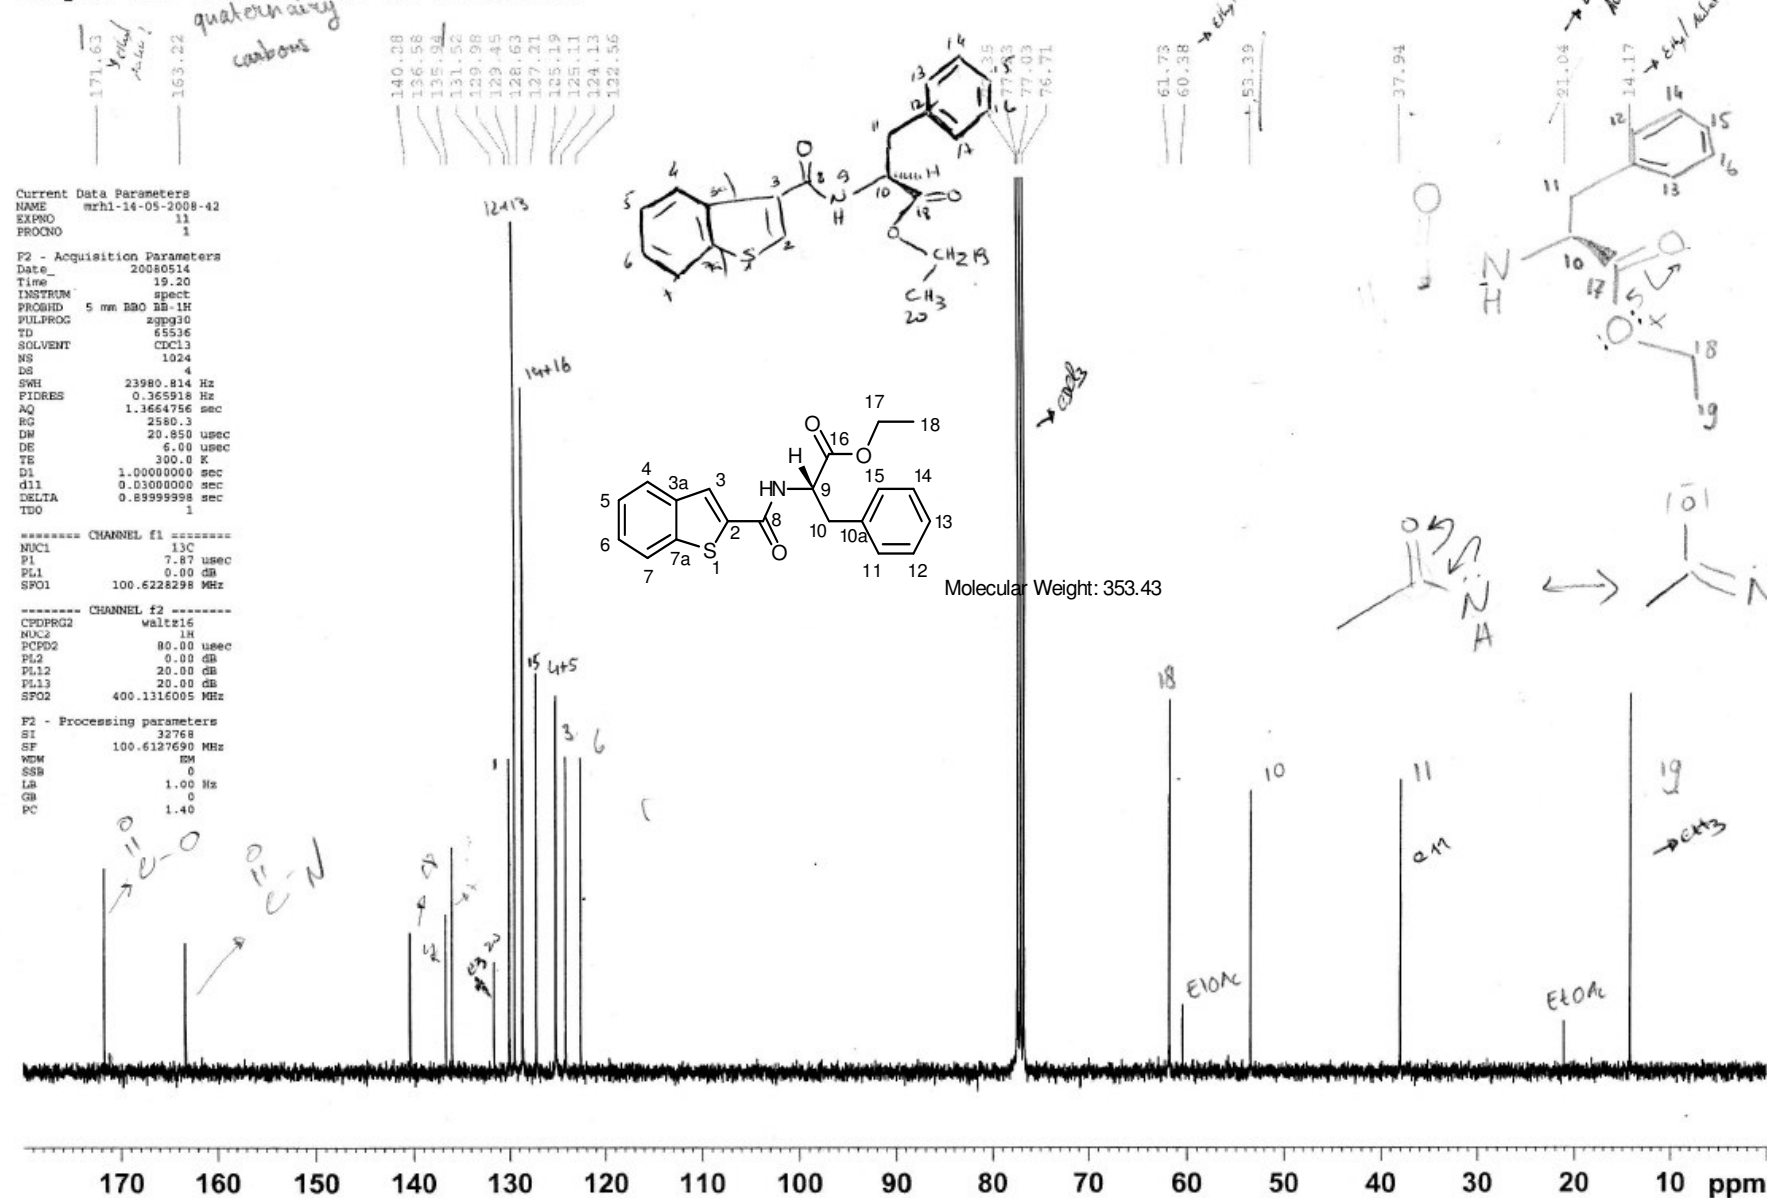

Sample Ref 001-DA-030-01  
001-DA-030-01

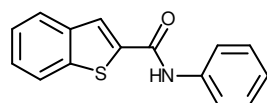

Molecular Weight: 253.32

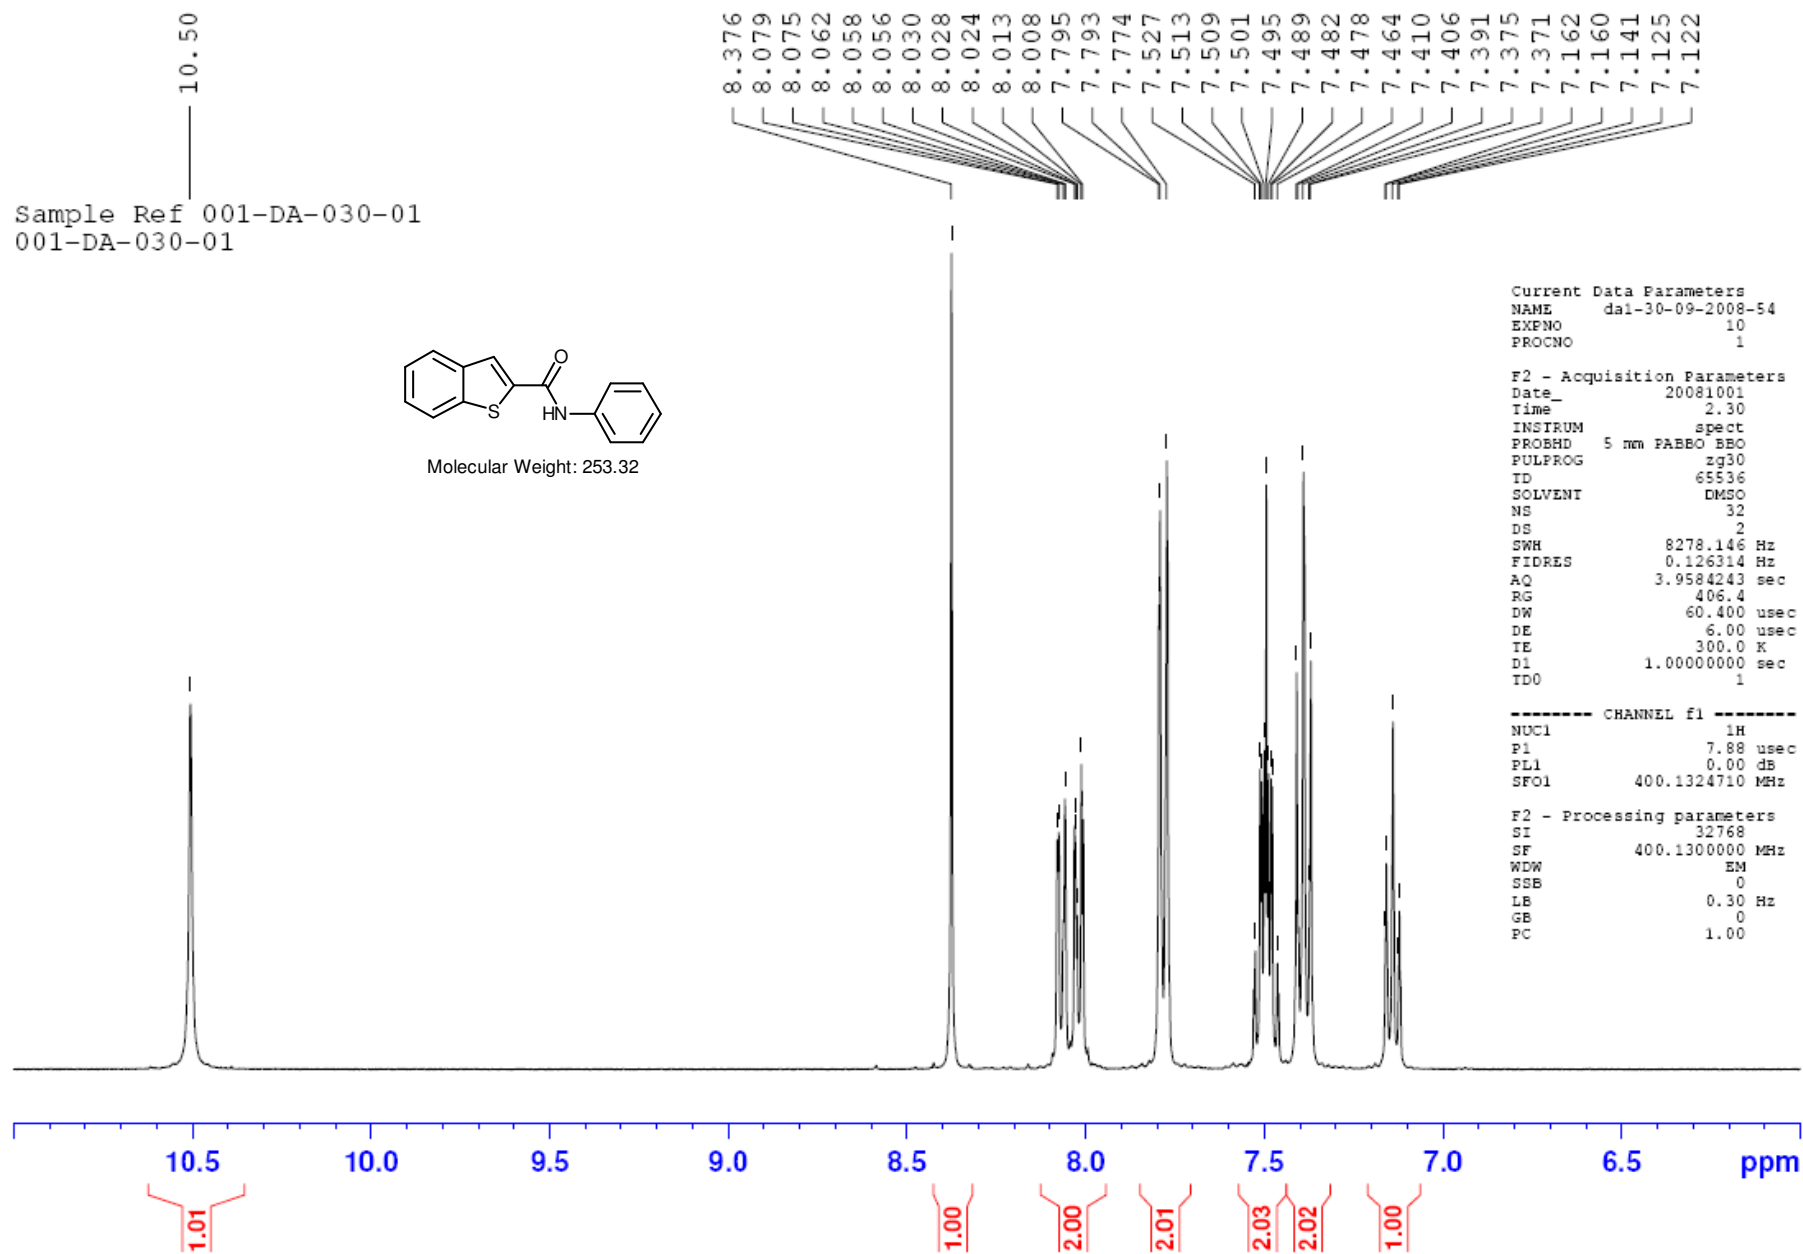

Current Data Parameters  
NAME dal-30-09-2008-54  
EXPNO 10  
PROCNO 1

F2 - Acquisition Parameters  
Date\_ 20081001  
Time 2.30  
INSTRUM spect  
PROBHD 5 mm PABBO BBO  
PULPROG zg30  
TD 65536  
SOLVENT DMSO  
NS 32  
DS 2  
SWH 8278.146 Hz  
FIDRES 0.126314 Hz  
AQ 3.9584243 sec  
RG 406.4  
DW 60.400 usec  
DE 6.00 usec  
TE 300.0 K  
D1 1.00000000 sec  
TD0 1

----- CHANNEL f1 -----  
NUC1 1H  
P1 7.88 usec  
PL1 0.00 dB  
SFO1 400.1324710 MHz

F2 - Processing parameters  
SI 32768  
SF 400.1300000 MHz  
WDW EM  
SSB 0  
LB 0.30 Hz  
GB 0  
PC 1.00

Sample Ref 001-DA-030-01  
001-DA-030-01

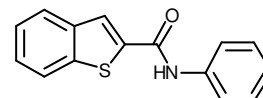

Molecular Weight: 253.32

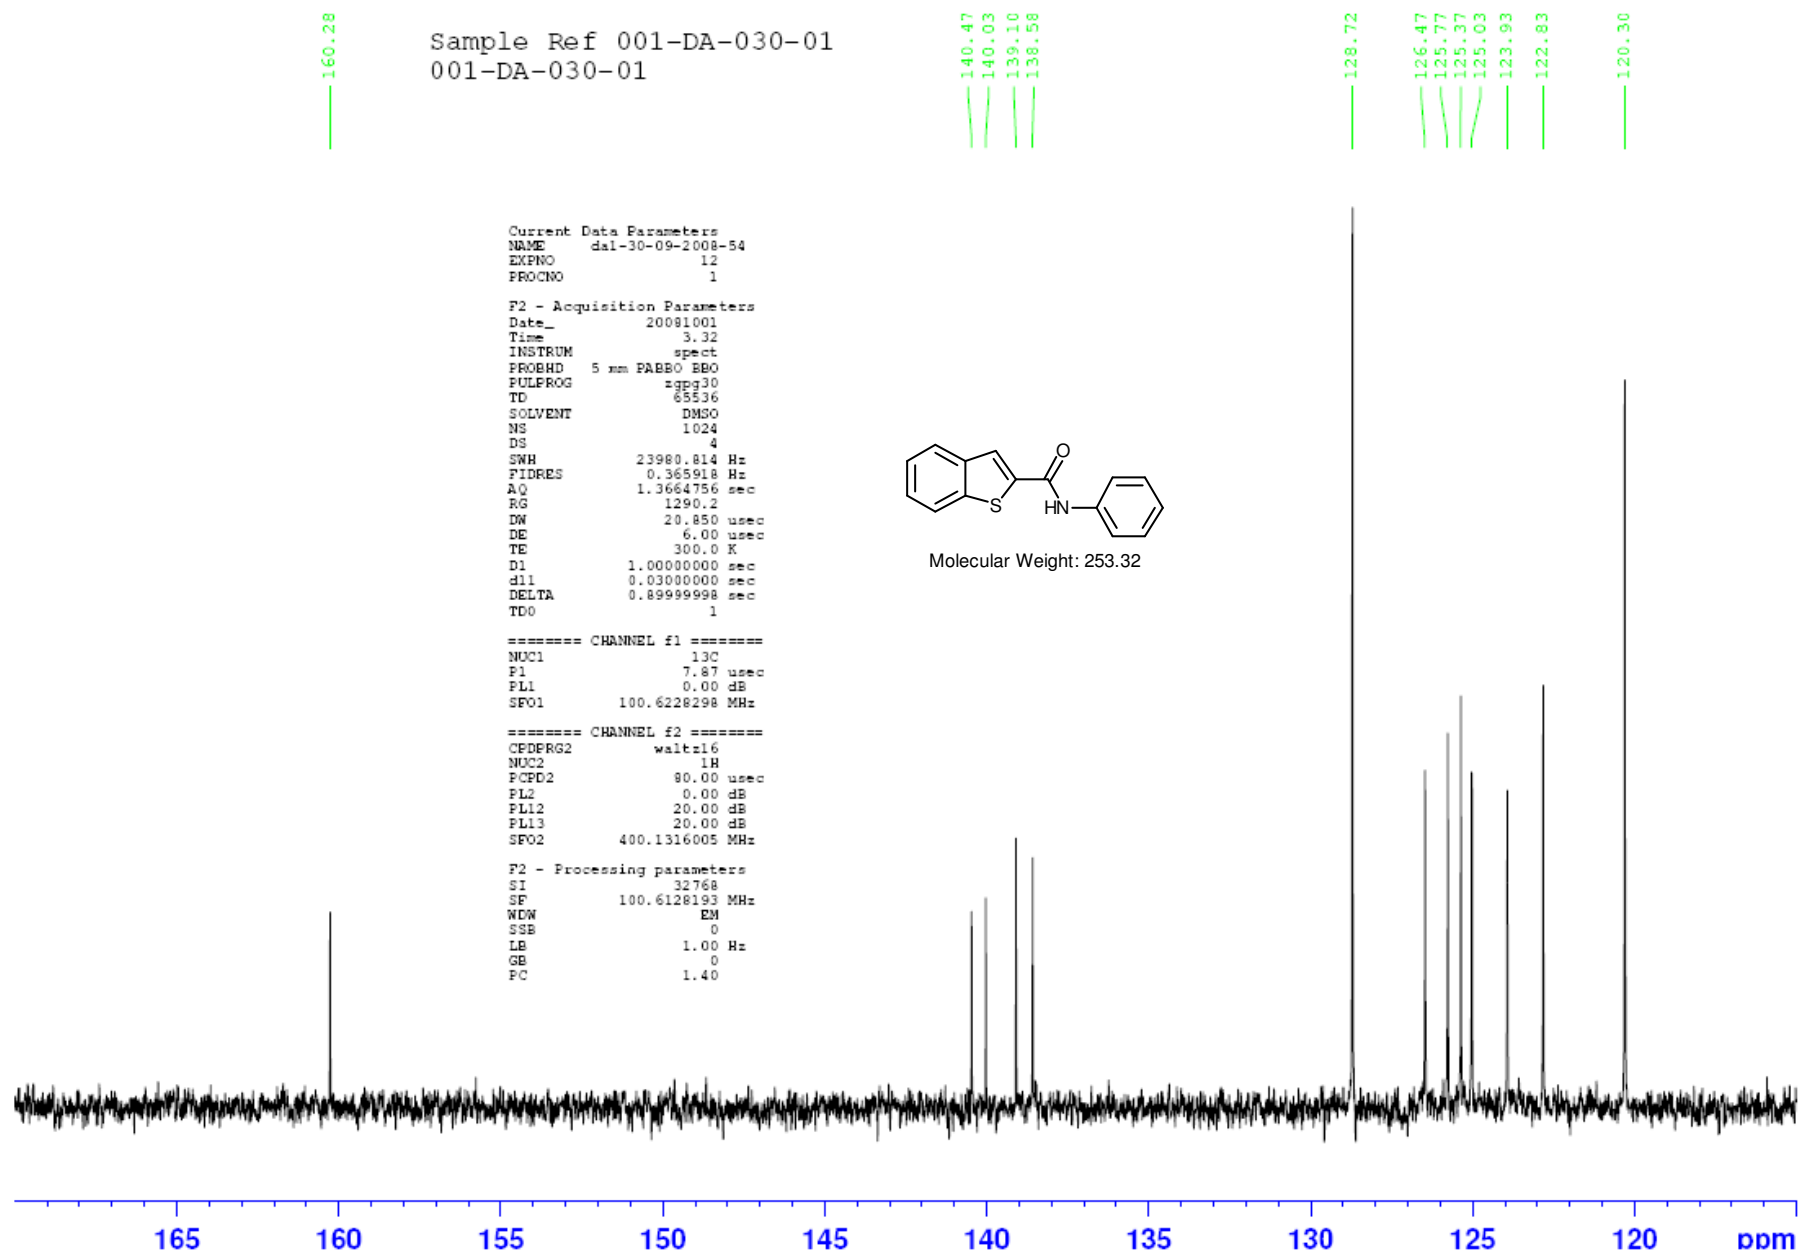

Sample Ref S1C17

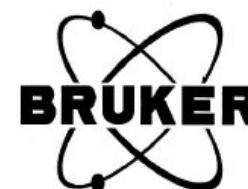

Current Data Parameters  
NAME mrh1-02-12-2008-60  
EXPNO 10  
PROCNO 1

F2 - Acquisition Parameters  
Date\_ 20081202  
Time 18.13  
INSTRUM spect  
PROBHD 5 mm BBO BB-1H  
PULPROG zg30  
TD 65536  
SOLVENT CDCl3  
NS 128  
DS 2  
SWH 8278.146 Hz  
FIDRES 0.126314 Hz  
AQ 3.9584243 sec  
RG 228.1  
DW 60.400 usec  
DE 6.00 usec  
TE 300.0 K  
D1 1.00000000 sec  
TD0 1

===== CHANNEL f1 =====  
NUC1 1H  
P1 7.88 usec  
PL1 0.00 dB  
SFO1 400.1324710 MHz

F2 - Processing parameters  
SI 32768  
SF 400.1300396 MHz  
WDW EM  
SSB 0  
LB 0.30 Hz  
GB 0  
PC 1.00

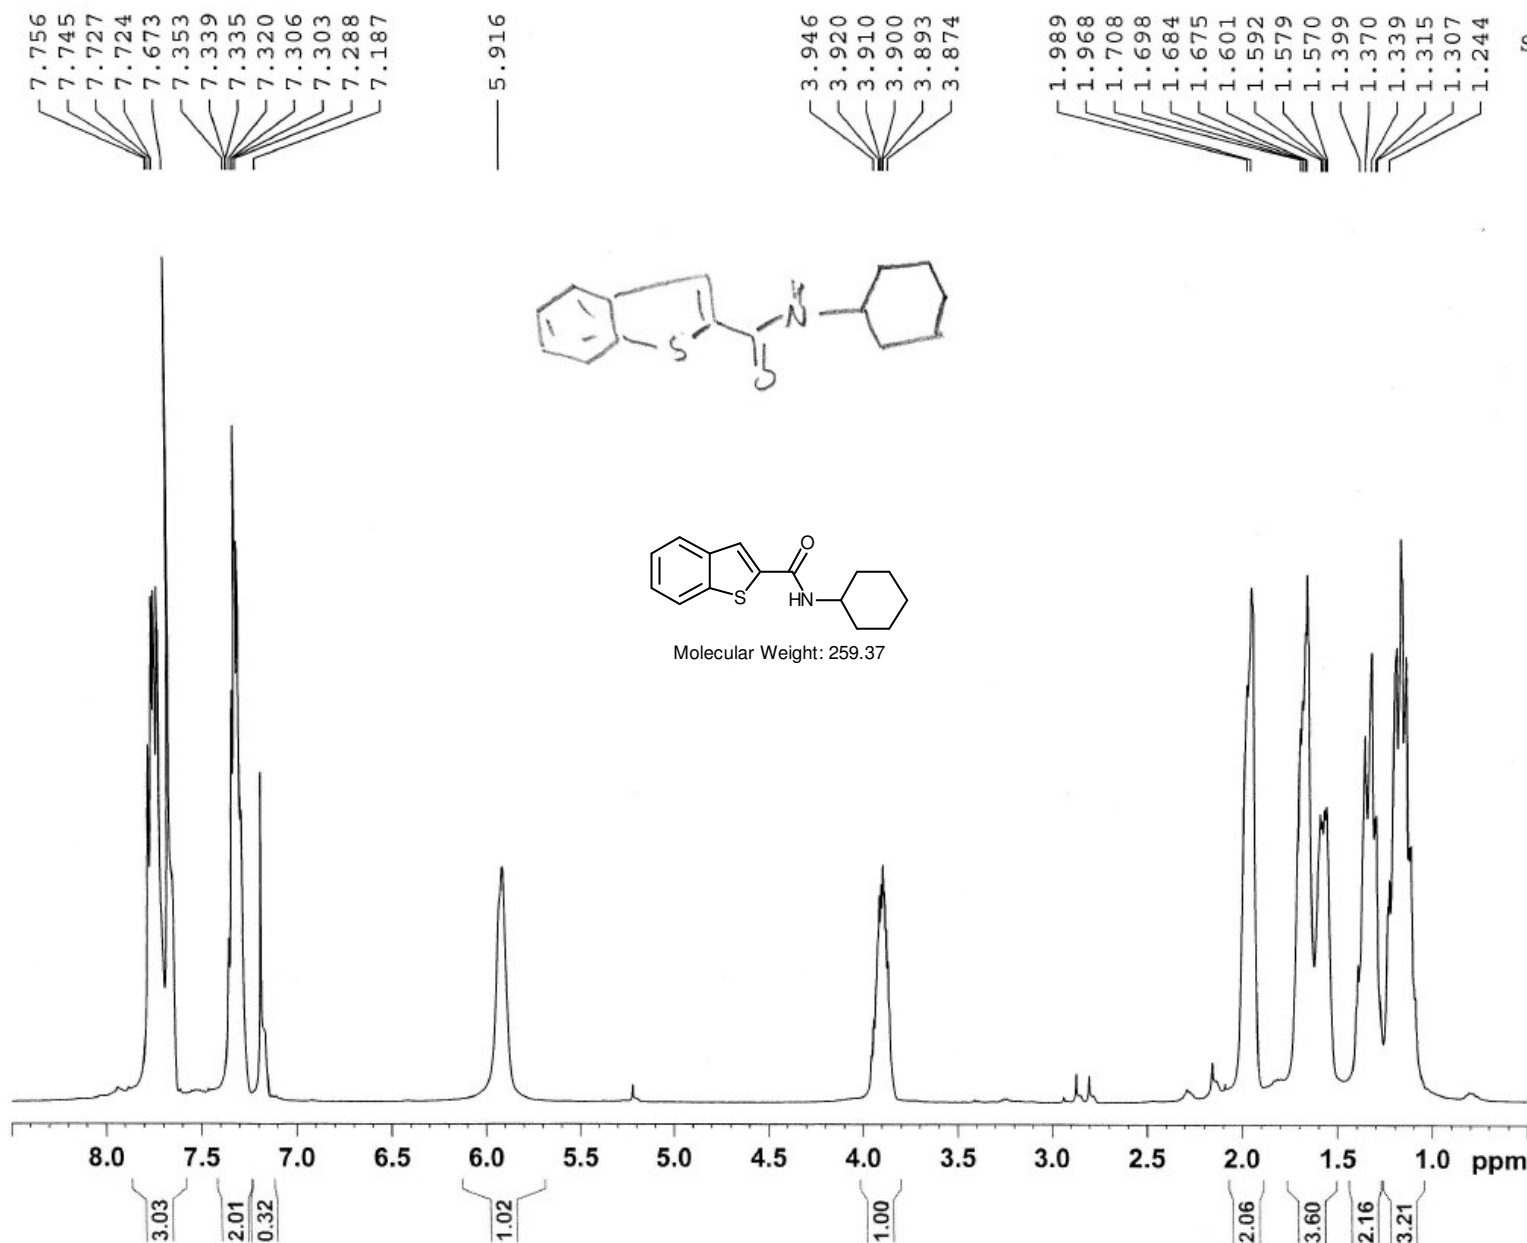

Sample Ref S1C17

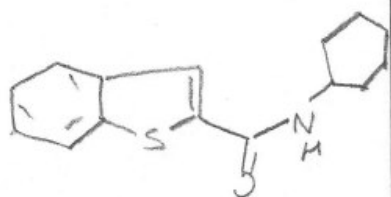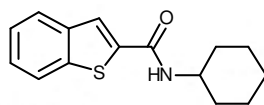

Molecular Weight: 259.37

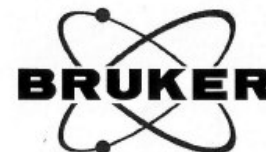

Current Data Parameters  
NAME mrh1-02-12-2008-60  
EXPNO 11  
PROCNO 1

F2 - Acquisition Parameters  
Date\_ 20081202  
Time 19.00  
INSTRUM spect  
PROBHD 5 mm BBO BB-1H  
PULPROG zgpg30  
TD 65536  
SOLVENT CDCl3  
NS 1024  
DS 4  
SWH 23980.814 Hz  
FIDRES 0.365918 Hz  
AQ 1.3664756 sec  
RG 5160.6  
DW 20.850 usec  
DE 6.00 usec  
TE 300.0 K  
D1 1.00000000 sec  
d11 0.03000000 sec  
DELTA 0.89999998 sec  
TD0 1

===== CHANNEL f1 =====  
NUC1 13C  
P1 7.87 usec  
PL1 0.00 dB  
SFO1 100.6228298 MHz

===== CHANNEL f2 =====  
CPDPRG2 waltz16  
NUC2 1H  
PCPD2 80.00 usec  
PL2 0.00 dB  
PL12 20.00 dB  
PL13 20.00 dB  
SFO2 400.1316005 MHz

F2 - Processing parameters  
SI 32768  
SF 100.6127690 MHz  
WDW EM  
SSB 0  
LB 1.00 Hz  
GB 0  
PC 1.40

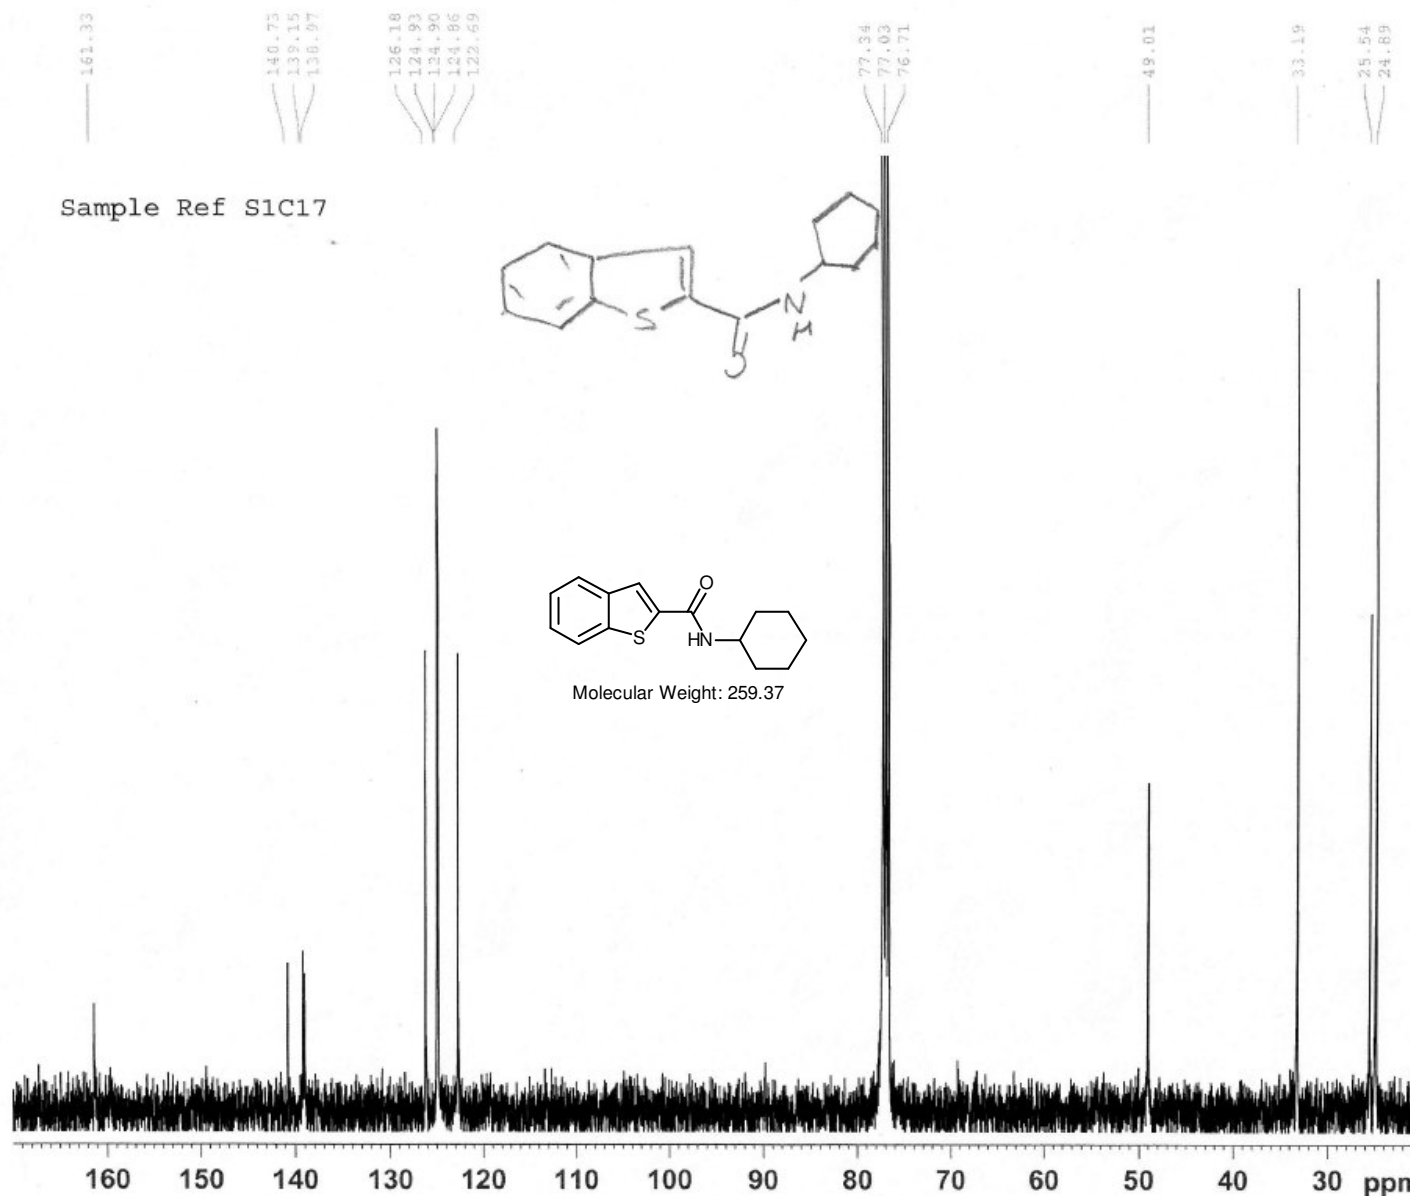



Sample Ref 001-DA-034-01  
3-COOH + H

Current Data Parameters  
NAME dal-07-10-2008-36  
EXPNO 12  
PROCNO 1

F2 - Acquisition Parameters  
Date\_ 20081007  
Time 18.57  
INSTRUM spect  
PROBHD 5 mm PABBO BBO  
PULPROG zgpg30  
TD 65536  
SOLVENT CDCl3  
NS 1024  
DS 4  
SWH 23980.814 Hz  
FIDRES 0.365918 Hz  
AQ 1.3664756 sec  
RG 1149.4  
DW 20.850 usec  
DE 6.00 usec  
TE 300.0 K  
D1 1.00000000 sec  
d11 0.03000000 sec  
DELTA 0.89999998 sec  
TD0 1

===== CHANNEL f1 =====  
NUC1 13C  
P1 7.87 usec  
PL1 0.00 dB  
SFO1 100.6228298 MHz

===== CHANNEL f2 =====  
CPDPRG2 waltz16  
NUC2 1H  
PCPD2 80.00 usec  
PL2 0.00 dB  
PL12 20.00 dB  
PL13 20.00 dB  
SFO2 400.1316005 MHz

F2 - Processing parameters  
SI 32768  
SF 100.6127690 MHz  
WDW EM  
SSB 0  
LB 1.00 Hz  
GB 0  
PC 1.40

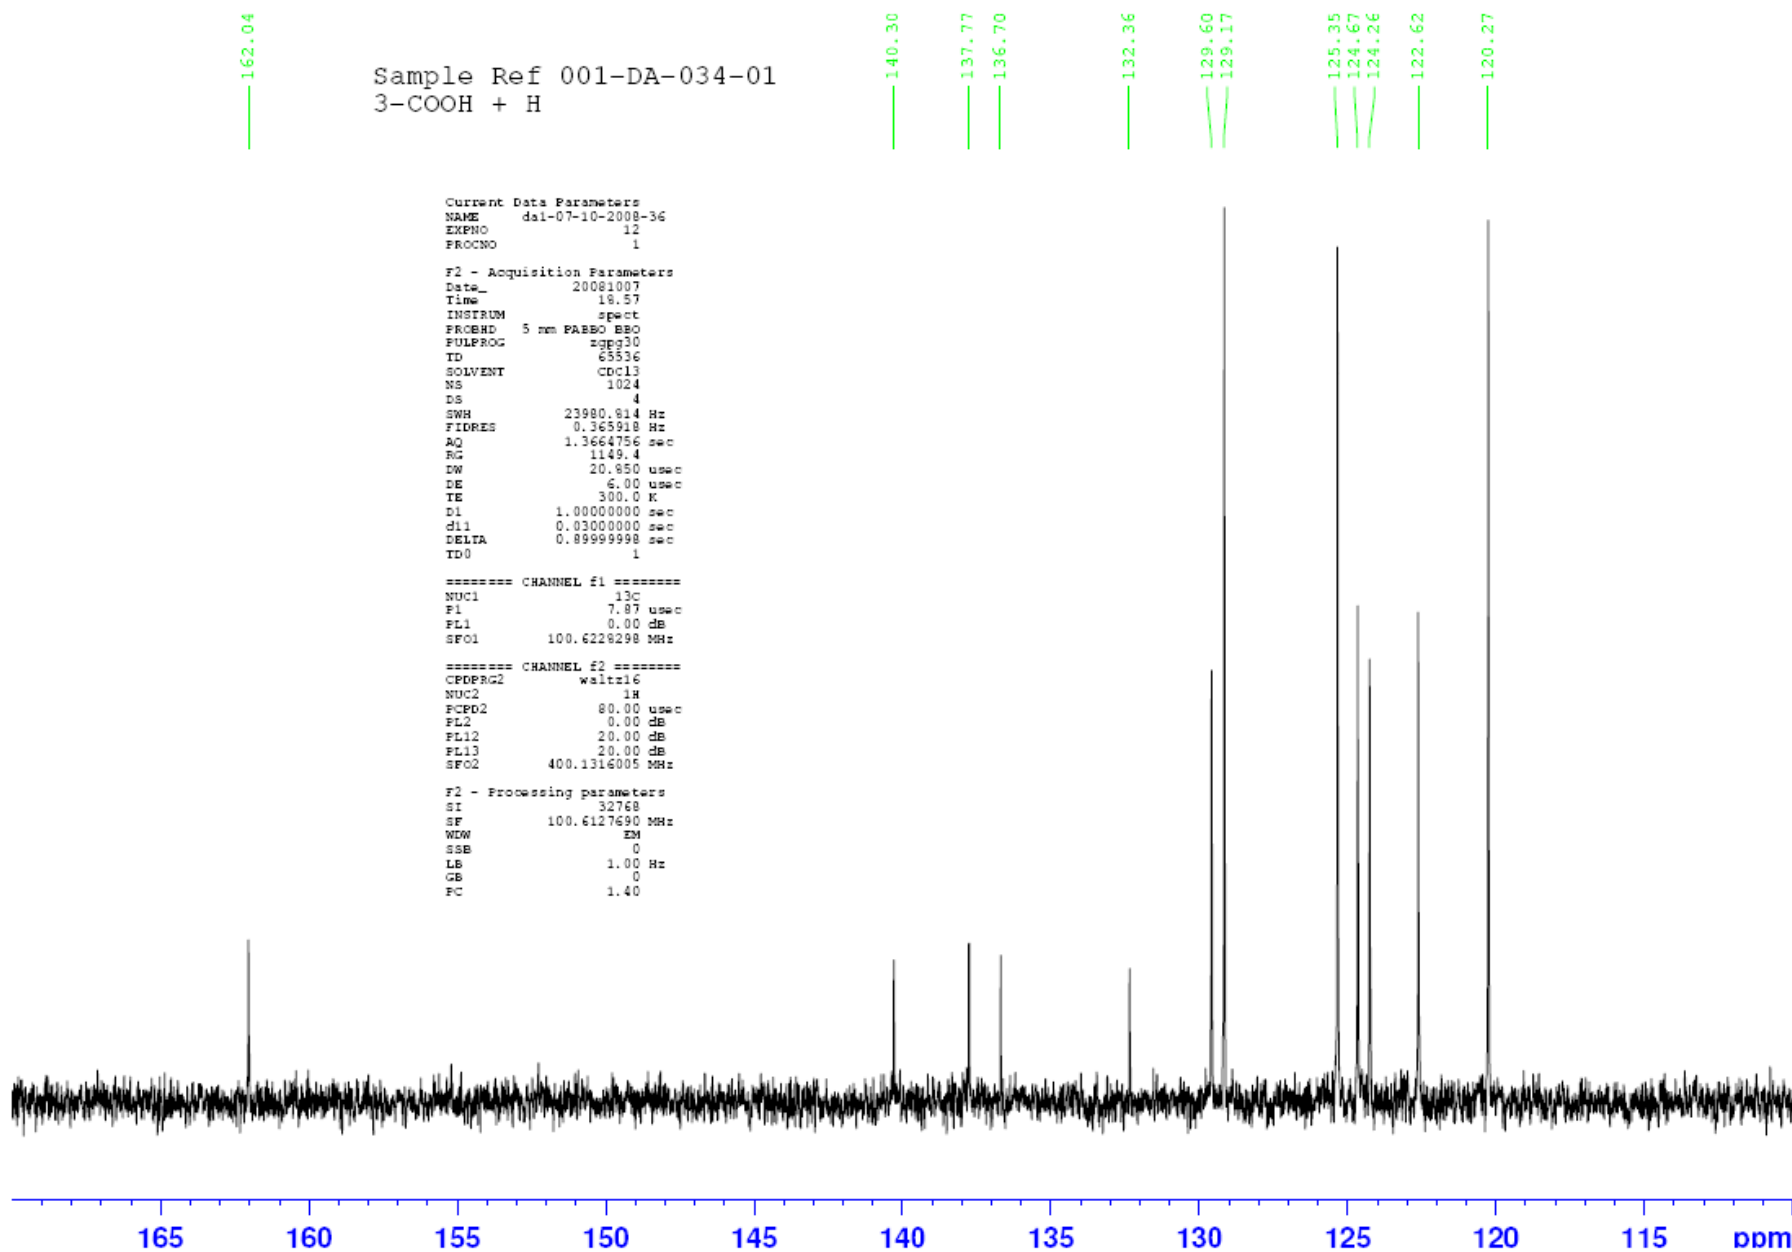

Sample Ref 001-DA-034-01  
3-COOH + H

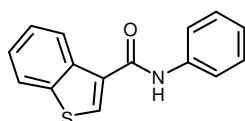

Molecular Weight: 253.32

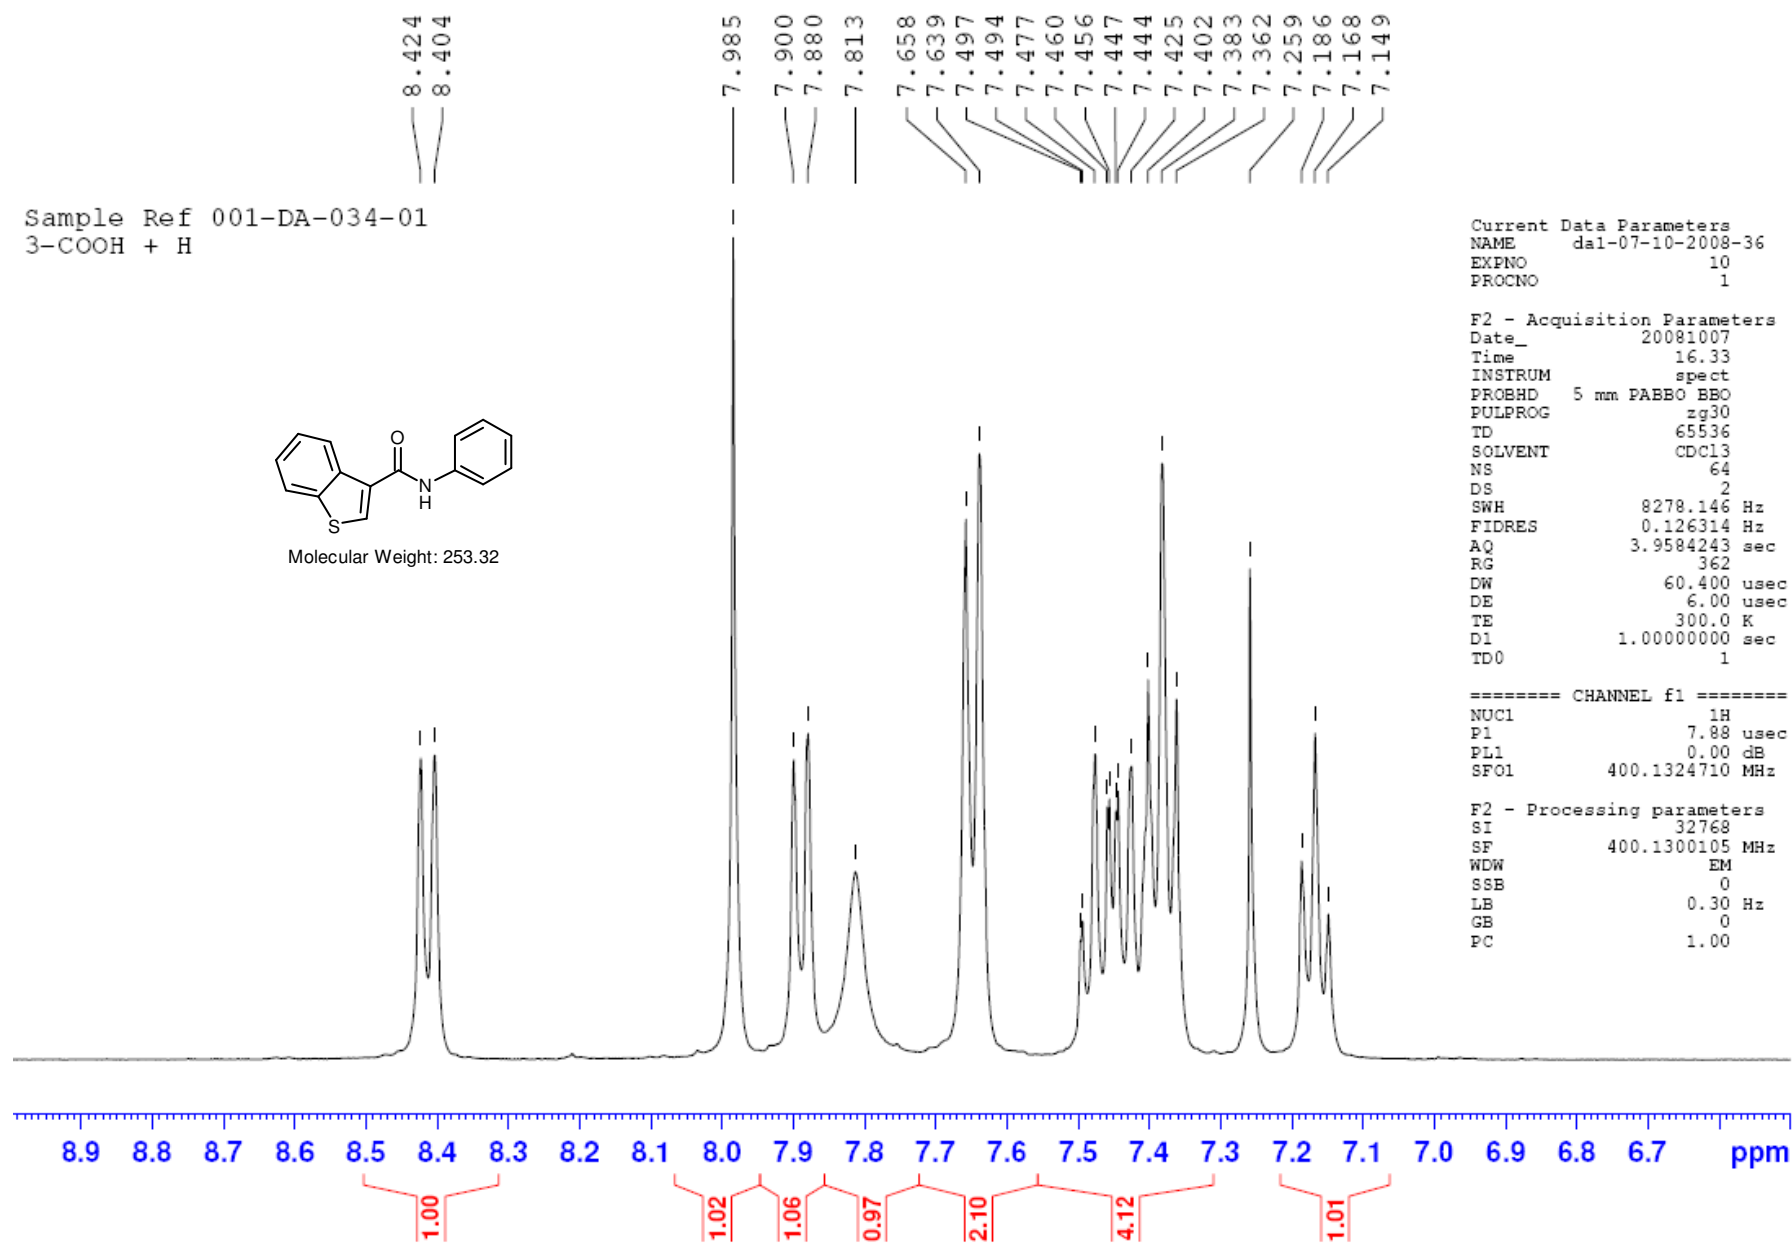

Current Data Parameters  
NAME dal-07-10-2008-36  
EXPNO 10  
PROCNO 1

F2 - Acquisition Parameters  
Date\_ 20081007  
Time 16.33  
INSTRUM spect  
PROBHD 5 mm PABBO BBO  
PULPROG zg30  
TD 65536  
SOLVENT CDCl3  
NS 64  
DS 2  
SWH 8278.146 Hz  
FIDRES 0.126314 Hz  
AQ 3.9584243 sec  
RG 362  
DW 60.400 usec  
DE 6.00 usec  
TE 300.0 K  
D1 1.00000000 sec  
TD0 1

===== CHANNEL f1 =====  
NUC1 1H  
P1 7.88 usec  
PL1 0.00 dB  
SFO1 400.1324710 MHz

F2 - Processing parameters  
SI 32768  
SF 400.1300105 MHz  
WDW EM  
SSB 0  
LB 0.30 Hz  
GB 0  
PC 1.00

Sample Ref 001-DA-034-01  
3-COOH + H

Current Data Parameters  
NAME dal-07-10-2008-36  
EXPNO 12  
PROCNO 1

F2 - Acquisition Parameters  
Date\_ 20081007  
Time 18.57  
INSTRUM spect  
PROBHD 5 mm PABBO BBO  
PULPROG zgpg30  
TD 65536  
SOLVENT CDCl3  
NS 1024  
DS 4  
SWH 23980.814 Hz  
FIDRES 0.365918 Hz  
AQ 1.3664756 sec  
RG 1149.4  
DW 20.850 usec  
DE 6.00 usec  
TE 300.0 K  
D1 1.00000000 sec  
d11 0.03000000 sec  
DELTA 0.89999998 sec  
TD0 1

===== CHANNEL f1 =====  
NUC1 13C  
P1 7.87 usec  
PL1 0.00 dB  
SFO1 100.6228298 MHz

===== CHANNEL f2 =====  
CPDPRG2 waltz16  
NUC2 1H  
PCPD2 80.00 usec  
PL2 0.00 dB  
PL12 20.00 dB  
PL13 20.00 dB  
SFO2 400.1316005 MHz

F2 - Processing parameters  
SI 32768  
SF 100.6127690 MHz  
WDW EM  
SSB 0  
LB 1.00 Hz  
GB 0  
PC 1.40

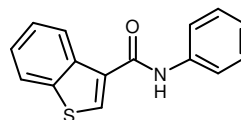

Molecular Weight: 253.32

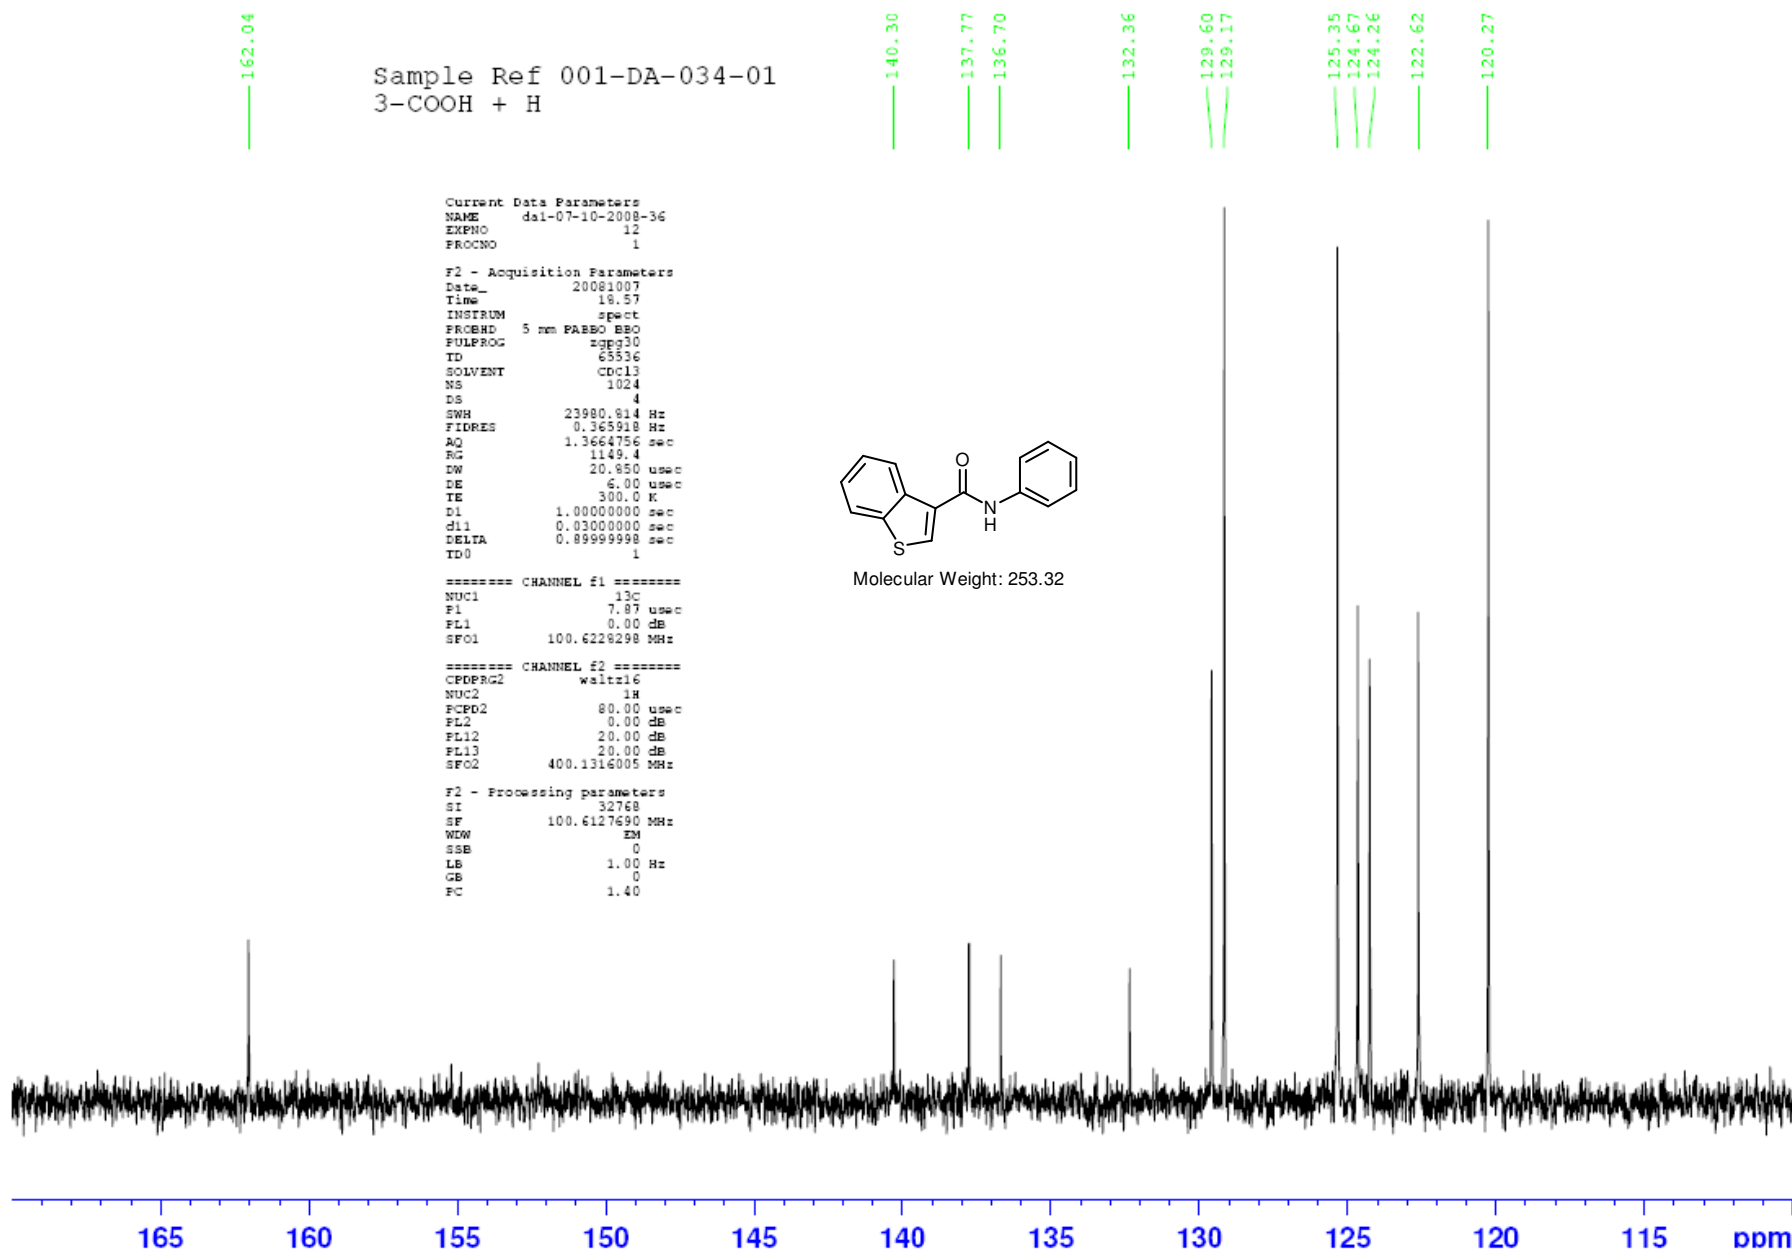

10.203

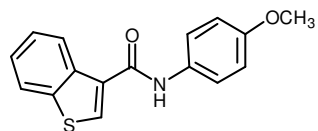

Molecular Weight: 283.34

8.519  
8.434  
8.431  
8.413  
8.089  
8.072  
8.068  
7.700  
7.678  
7.670  
7.505  
7.503  
7.488  
7.485  
7.470  
7.466  
7.452  
7.448  
7.434  
7.430  
6.965  
6.943  
6.935

Sample Ref 001-DA-032-01

Current Data Parameters  
NAME dal-03-10-2008-13  
EXPNO 10  
PROCNO 1

F2 - Acquisition Parameters  
Date\_ 20081003  
Time 16.19  
INSTRUM spect  
PROBHD 5 mm PABBO BBO  
PULPROG zg30  
TD 65536  
SOLVENT DMSO  
NS 64  
DS 2  
SWH 8278.146 Hz  
FIDRES 0.126314 Hz  
AQ 3.9584243 sec  
RG 456.1  
DW 60.400 usec  
DE 6.00 usec  
TE 300.0 K  
D1 1.00000000 sec  
TD0 1

----- CHANNEL f1 -----  
NUC1 1H  
P1 7.88 usec  
PL1 0.00 dB  
SFO1 400.1324710 MHz

F2 - Processing parameters  
SI 32768  
SF 400.1300000 MHz  
WDW EM  
SSB 0  
LB 0.30 Hz  
GB 0  
PC 1.00

3.765

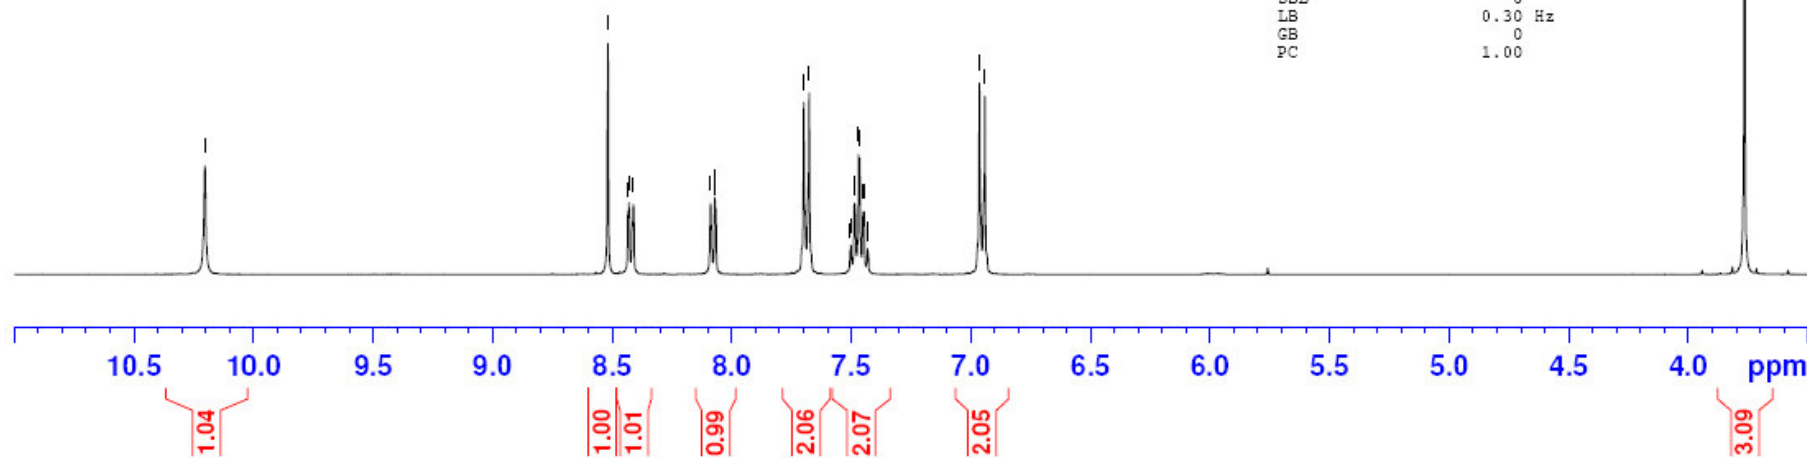

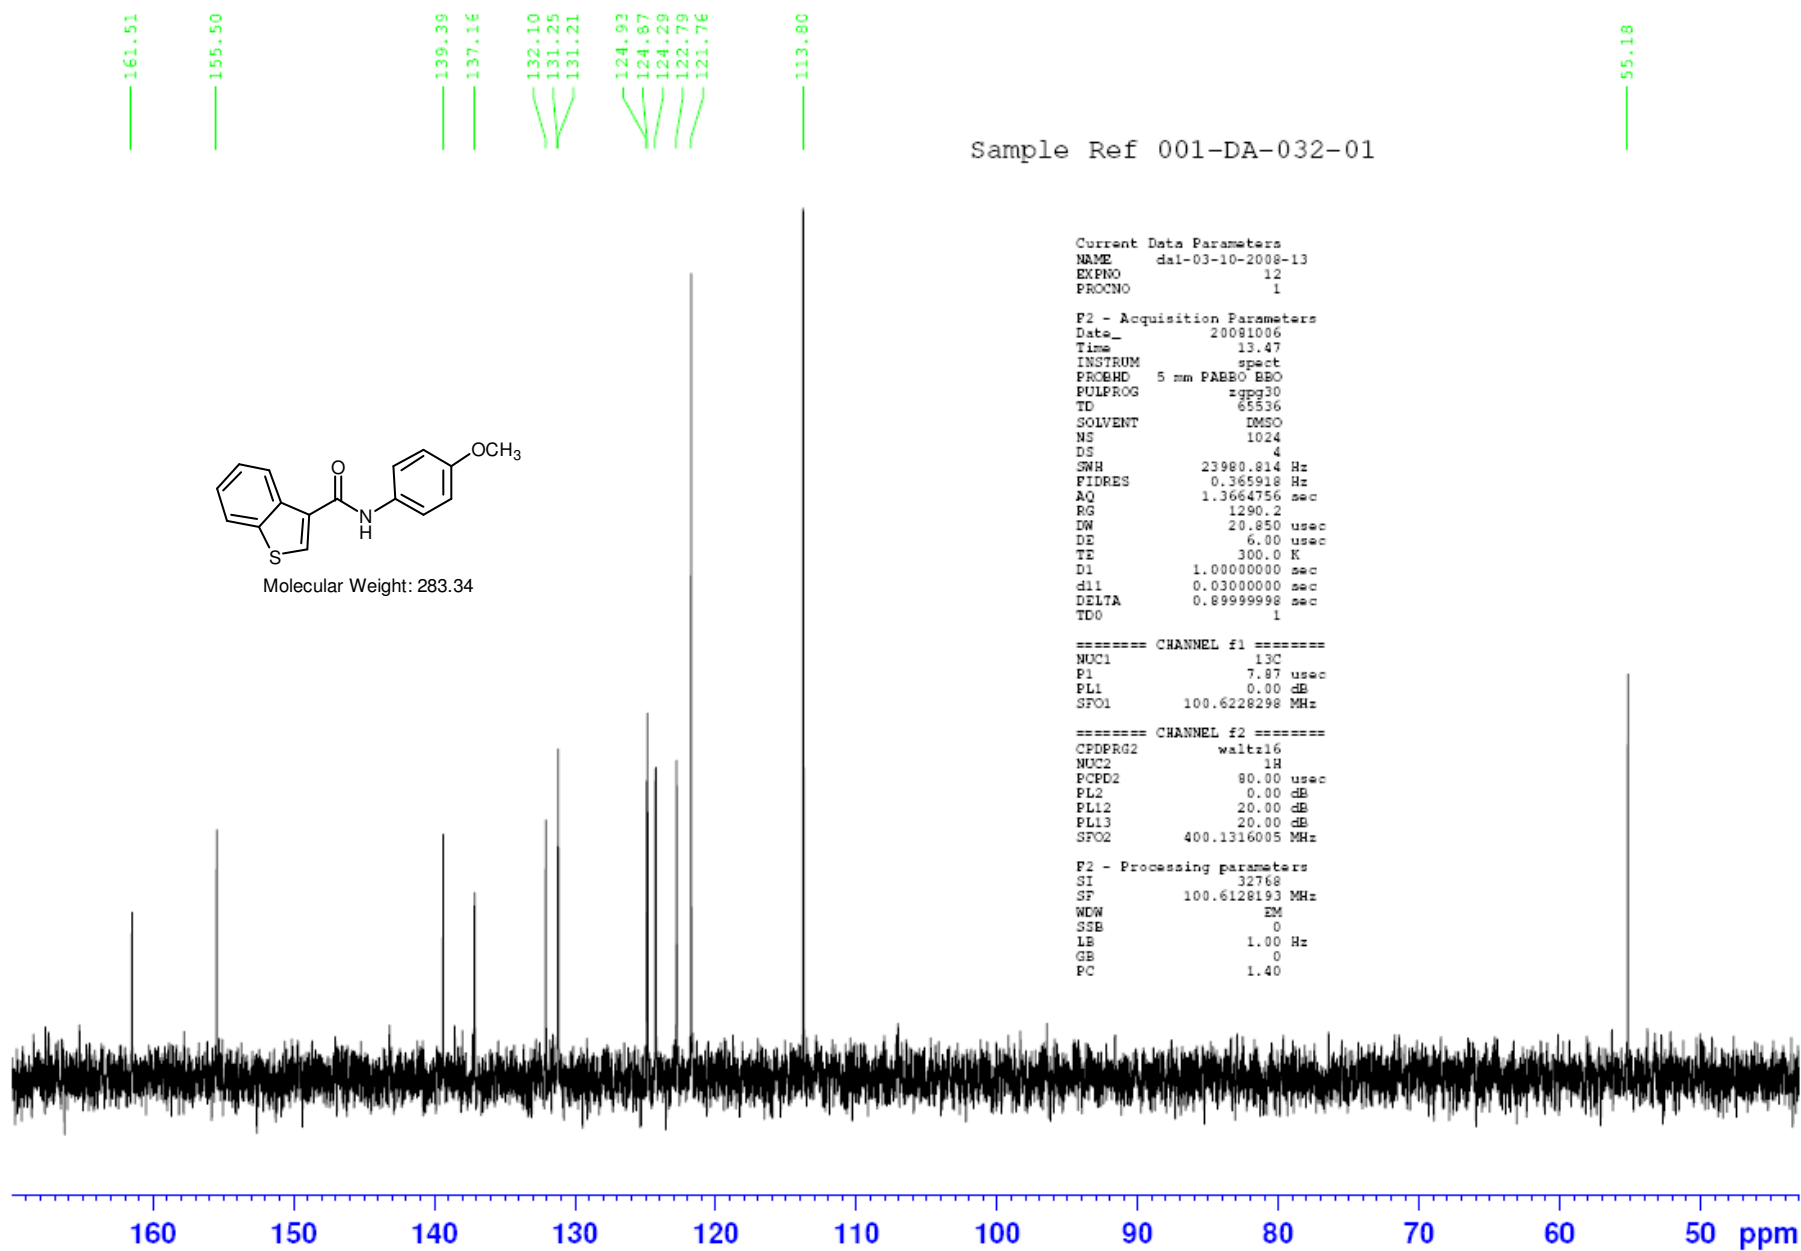

Sample Ref 001-DA-032-01

Current Data Parameters  
NAME dal-03-10-2008-13  
EXPNO 16  
PROCNO 1

F2 - Acquisition Parameters  
Date\_ 20081006  
Time 15.45  
INSTRUM spect  
PROBHD 5 mm PABBO BBO  
PULPROG noesyph  
TD 2048  
SOLVENT DMSO  
NS 4  
DS 4  
SWH 4222.973 Hz  
FIDRES 2.061999 Hz  
AQ 0.2425332 sec  
RG 256  
DW 118.400 usec  
DE 6.00 usec  
TE 300.0 K  
d0 0.00010837 sec  
D1 1.27454603 sec  
D8 0.80000001 sec  
INO 0.00023680 sec  
STICNT 128

----- CHANNEL f1 -----  
NUC1 <sup>1</sup>H  
P1 7.88 usec  
PL1 0.00 dB  
SFO1 400.1322609 MHz

F1 - Acquisition parameters  
ND0 1  
TD 256  
SFO1 400.1323 MHz  
FIDRES 16.495989 Hz  
SW 10.554 ppm  
FnMODE States-TPPI

F2 - Processing parameters  
SI 1024  
SF 400.1300000 MHz  
WDW QSINE  
SSE 2  
LB 0.00 Hz  
GB 0  
PC 1.00

F1 - Processing parameters  
SI 1024  
MC2 States-TPPI  
SF 400.1300000 MHz  
WDW QSINE  
SSE 2  
LB 0.00 Hz  
GB 0

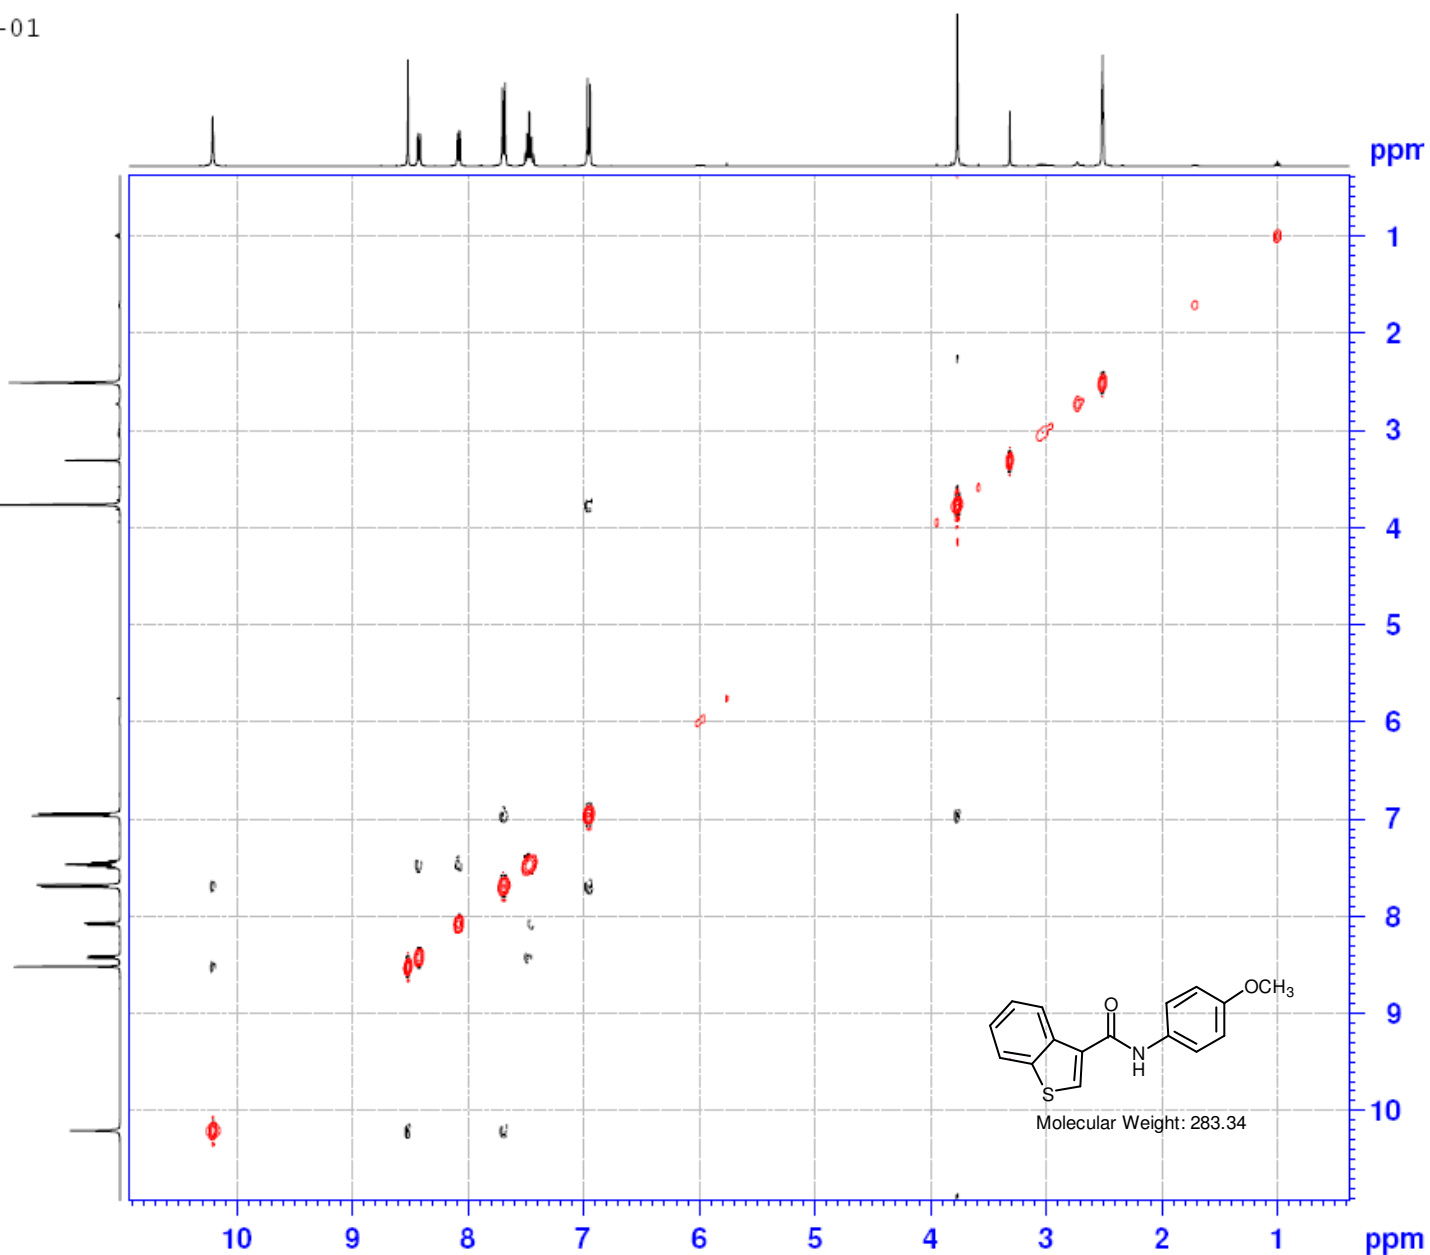

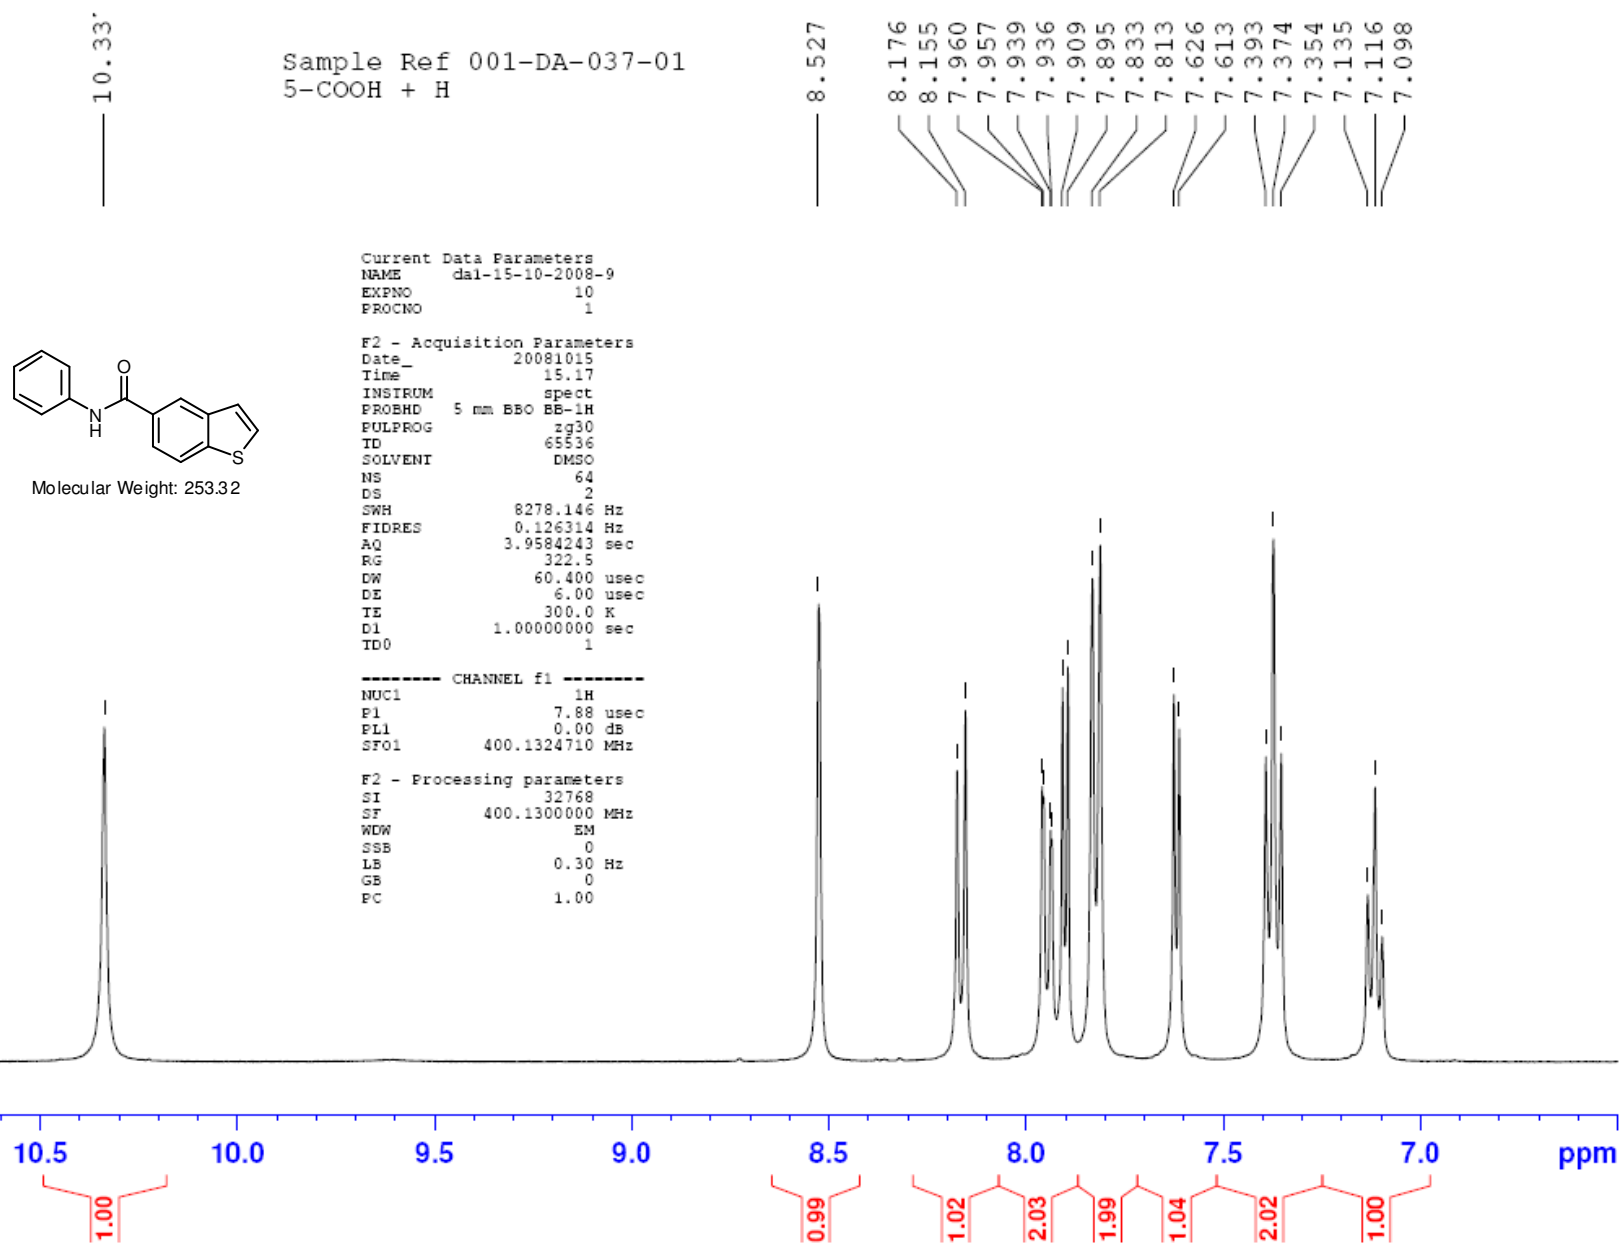

Sample Ref 001-DA-037-01  
5-COOH + H

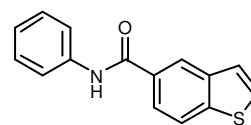

Molecular Weight: 253.32

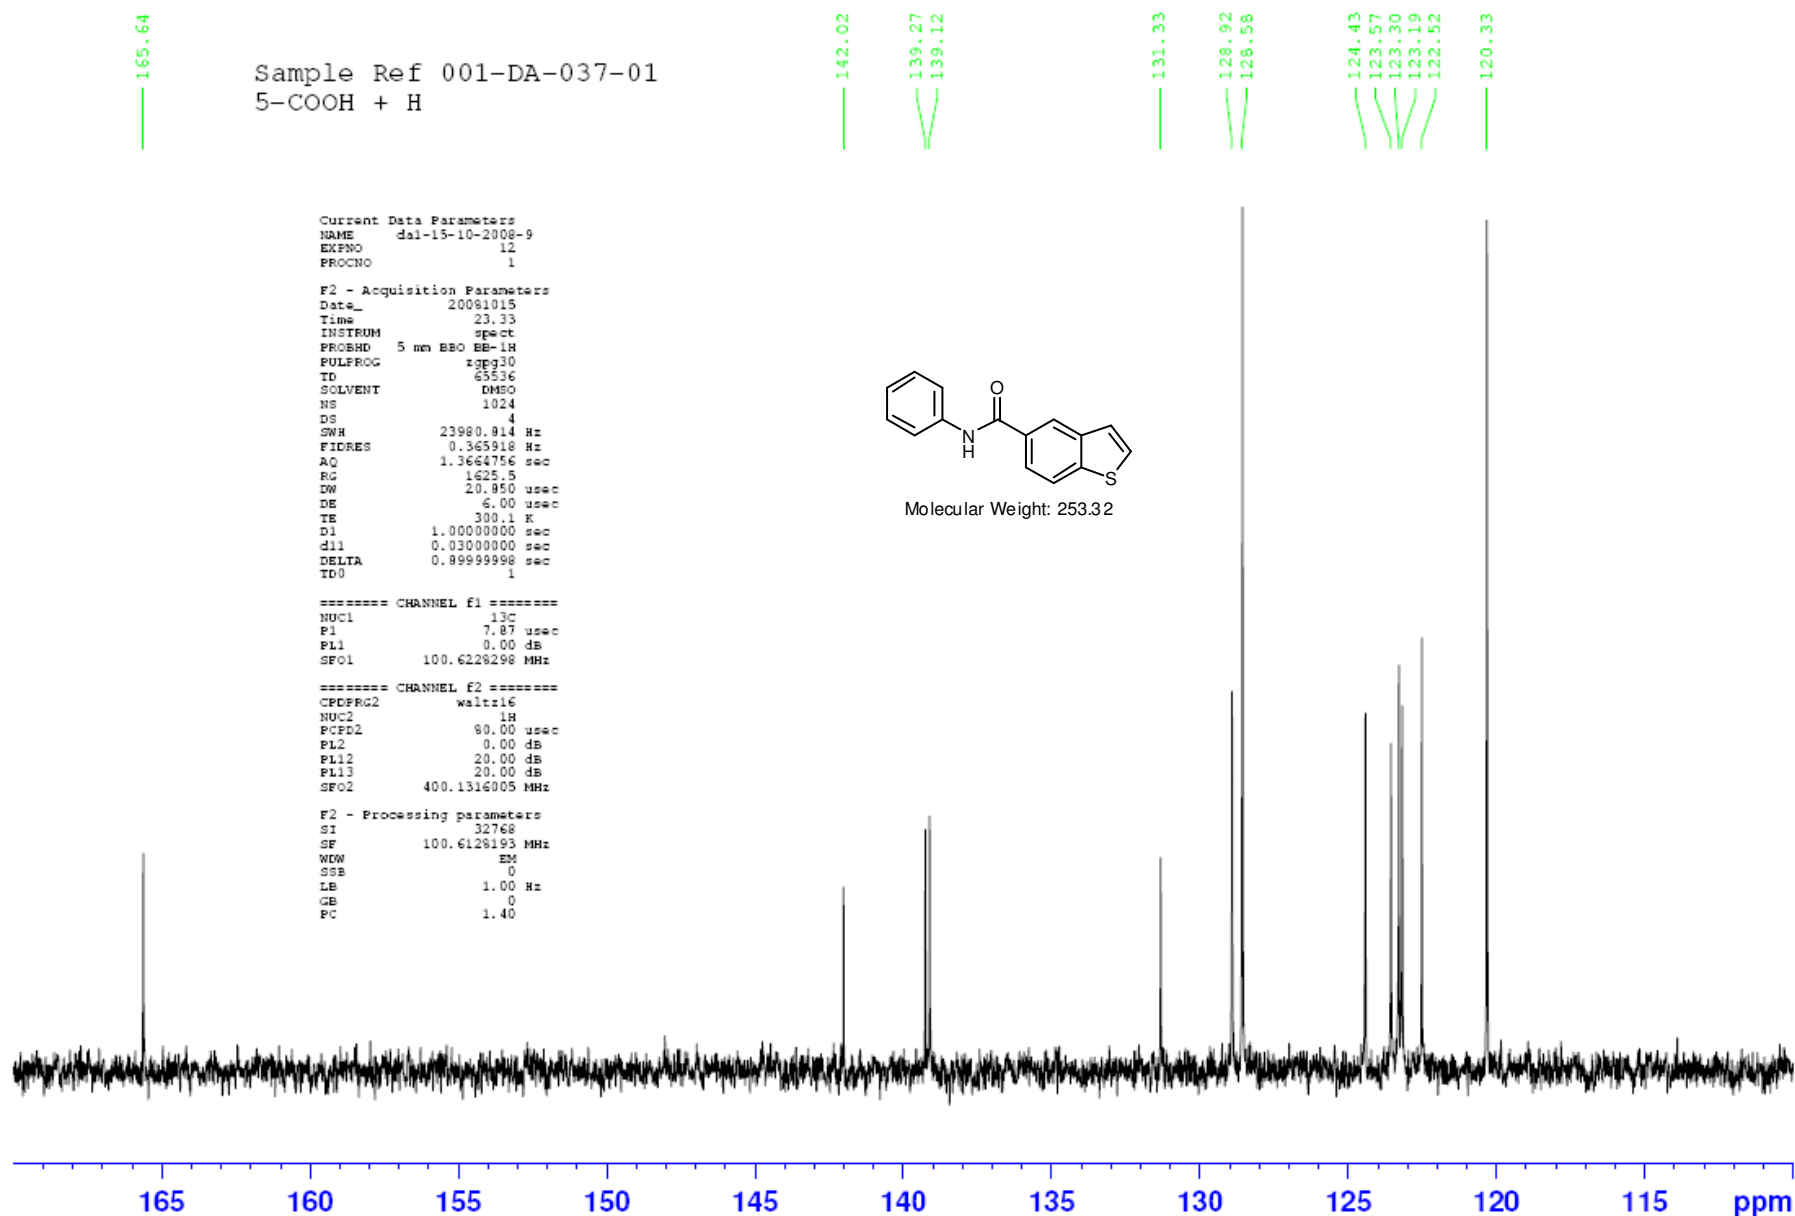



Sample Ref 001-DA-037-01  
5-COOH + H

Current Data Parameters  
NAME dal-15-10-2008-9  
EXPNO 16  
PROCNO 1

F2 - Acquisition Parameters  
Date\_ 20081016  
Time\_ 0.54  
INSTRUM spect  
PROBHD 5 mm BBO BB-1H  
PULPROG noesyph  
TD 2048  
SOLVENT DMSO  
NS 4  
DS 4  
SWH 4340.278 Hz  
FIDRES 2.119276 Hz  
AQ 0.2359796 sec  
RG 143.7  
DW 115.200 usec  
DE 6.00 usec  
TE 300.0 K  
d0 0.00010517 sec  
D1 1.28068995 sec  
D8 0.80000001 sec  
IN0 0.00023040 sec  
STICNT 128

----- CHANNEL f1 -----  
NUC1 1H  
P1 7.88 usec  
PL1 0.00 dB  
SFO1 400.1322912 MHz

F1 - Acquisition parameters  
ND0 1  
TD 256  
SFO1 400.1323 MHz  
FIDRES 16.954210 Hz  
SW 10.847 ppm  
FnMODE States-TPPI

F2 - Processing parameters  
SI 1024  
SF 400.1300000 MHz  
WDW QSINE  
SSB 2  
LB 0.00 Hz  
GB 0  
PC 1.00

F1 - Processing parameters  
SI 1024  
MC2 States-TPPI  
SF 400.1300000 MHz  
WDW QSINE  
SSB 2  
LB 0.00 Hz  
GB 0

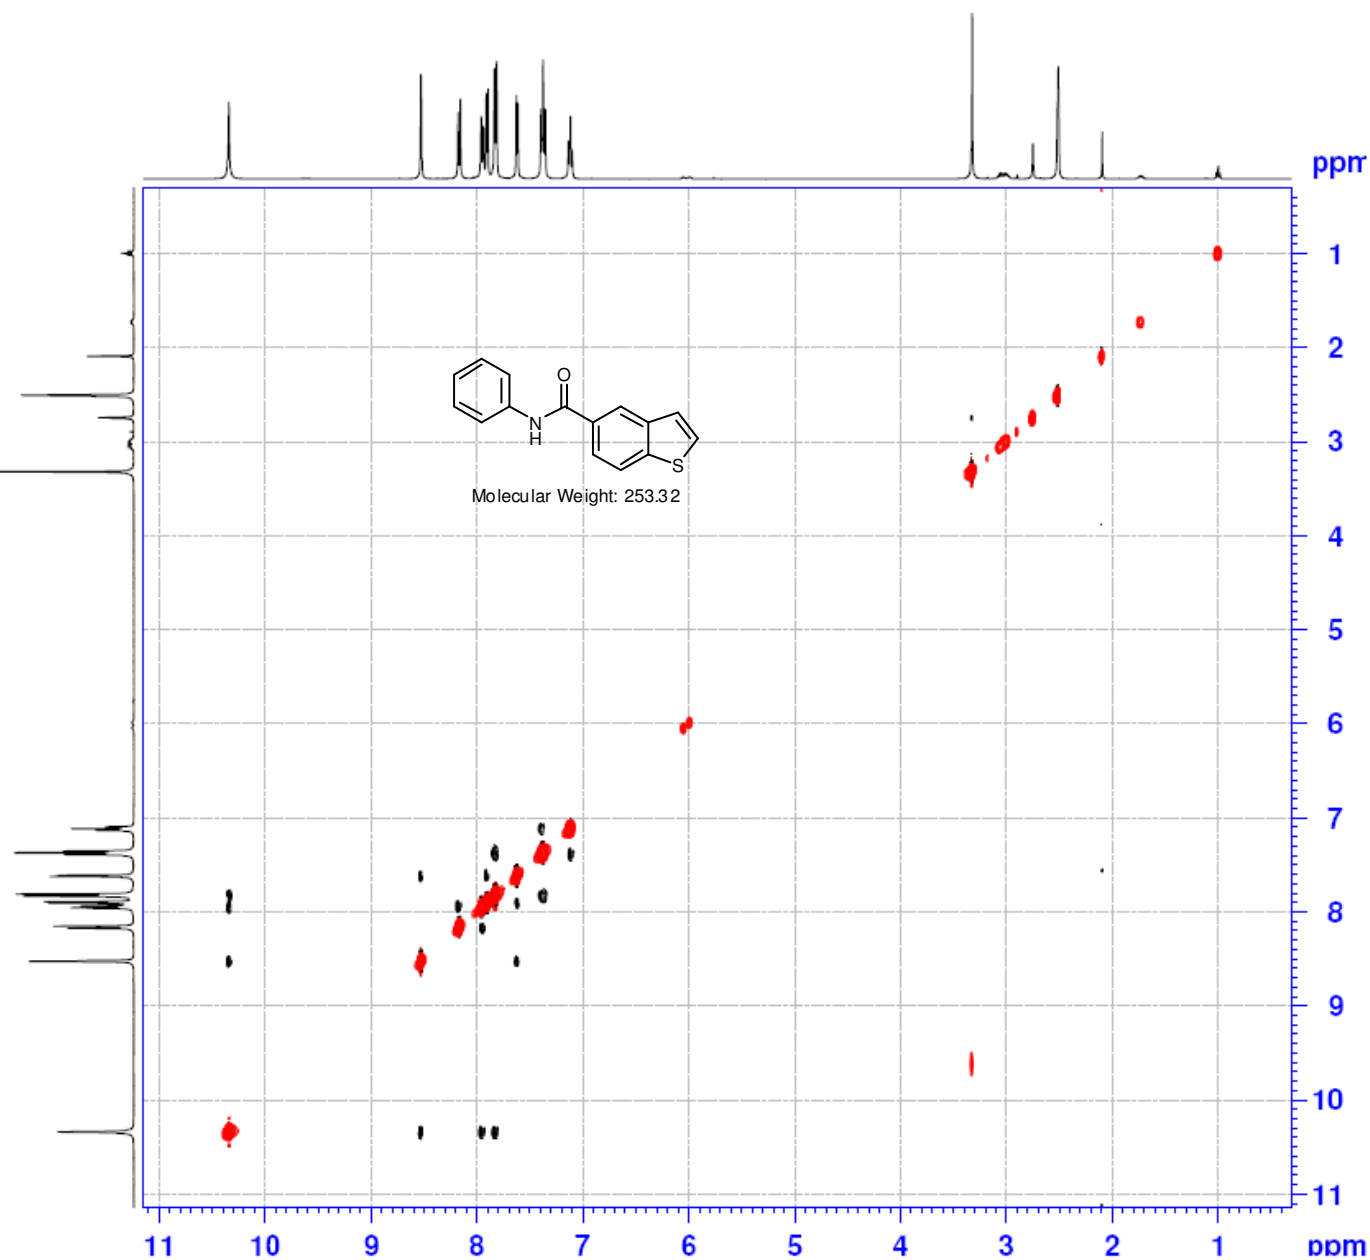

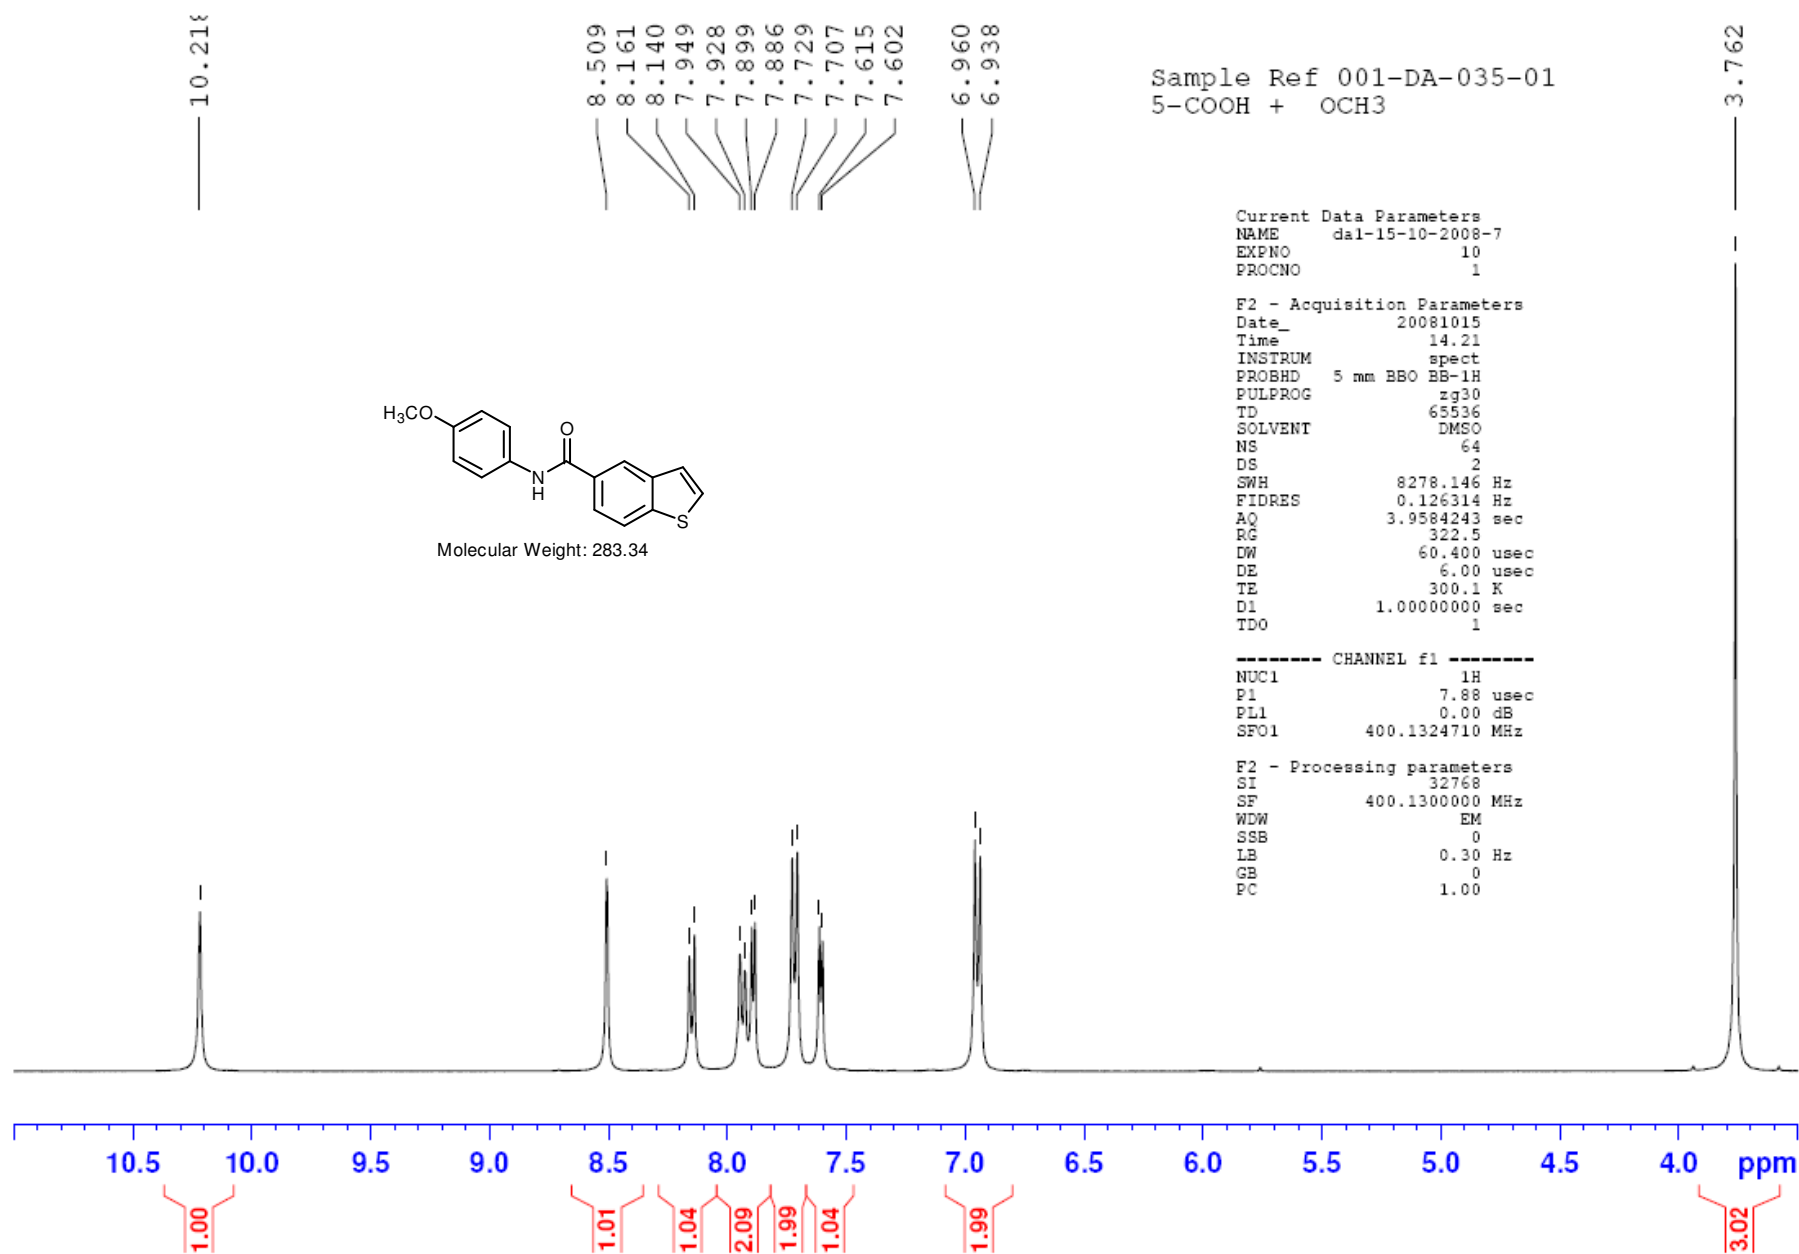

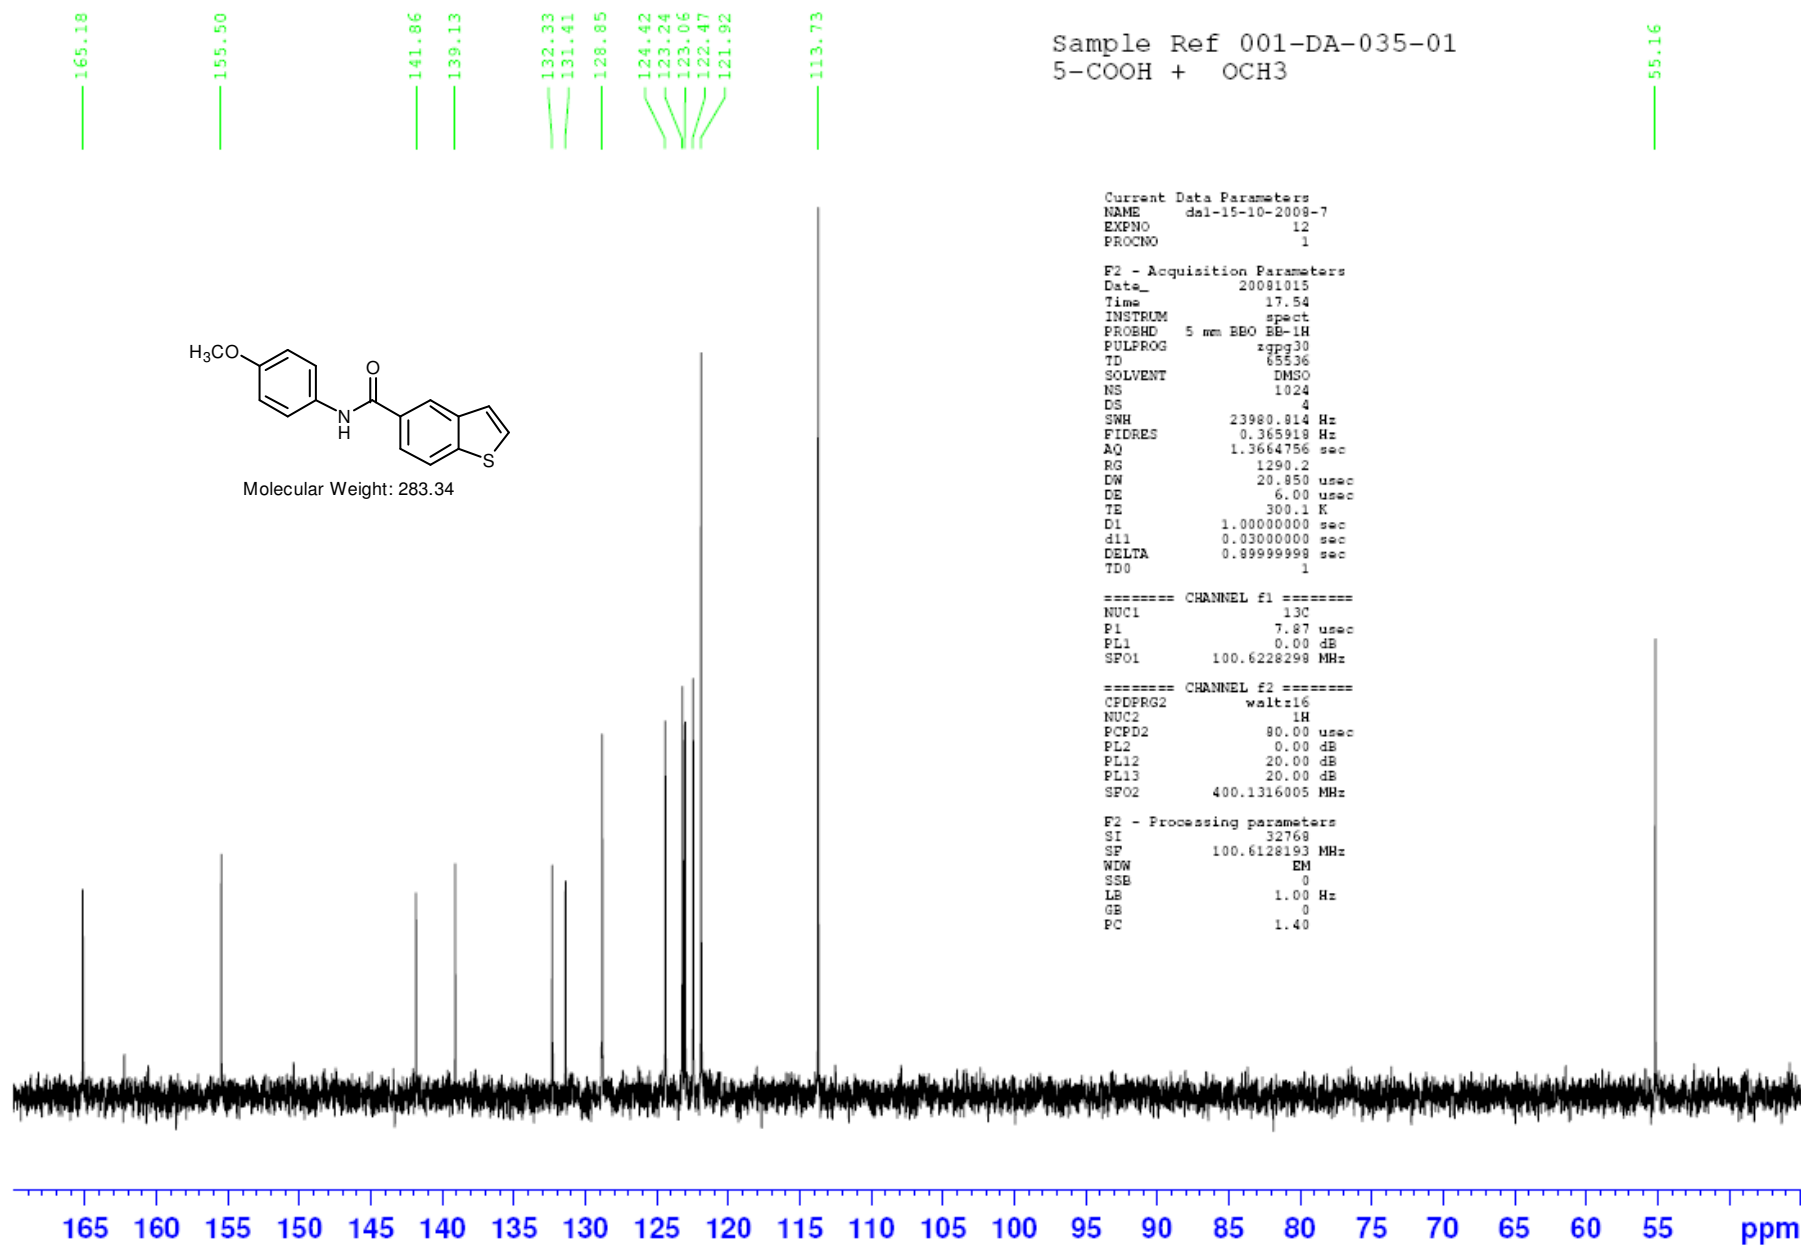

Sample Ref 2-B(OH)2 + 3-NO2

Current Data Parameters  
NAME dal-07-09-2007-36  
EXPNO 10  
PROCNO 1

F2 - Acquisition Parameters  
Date\_ 20070907  
Time 13.20  
INSTRUM spect  
PROBHD 5 mm BBO BB-1H  
PULPROG zg30  
TD 65536  
SOLVENT CDCl3  
NS 32  
DS 2  
SWH 8278.146 Hz  
FIDRES 0.126314 Hz  
AQ 3.9584243 sec  
RG 362  
DW 60.400 usec  
DE 6.00 usec  
TE 300.0 K  
D1 1.00000000 sec  
TD0 1

----- CHANNEL f1 -----  
NUC1 1H  
P1 7.88 usec  
PL1 0.00 dB  
SFO1 400.1324710 MHz

F2 - Processing parameters  
SI 32768  
SF 400.1300094 MHz  
WDW EM  
SSB 0  
LB 0.30 Hz  
GB 0  
PC 1.00

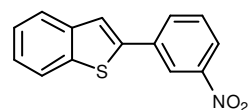

Molecular Weight: 255.29

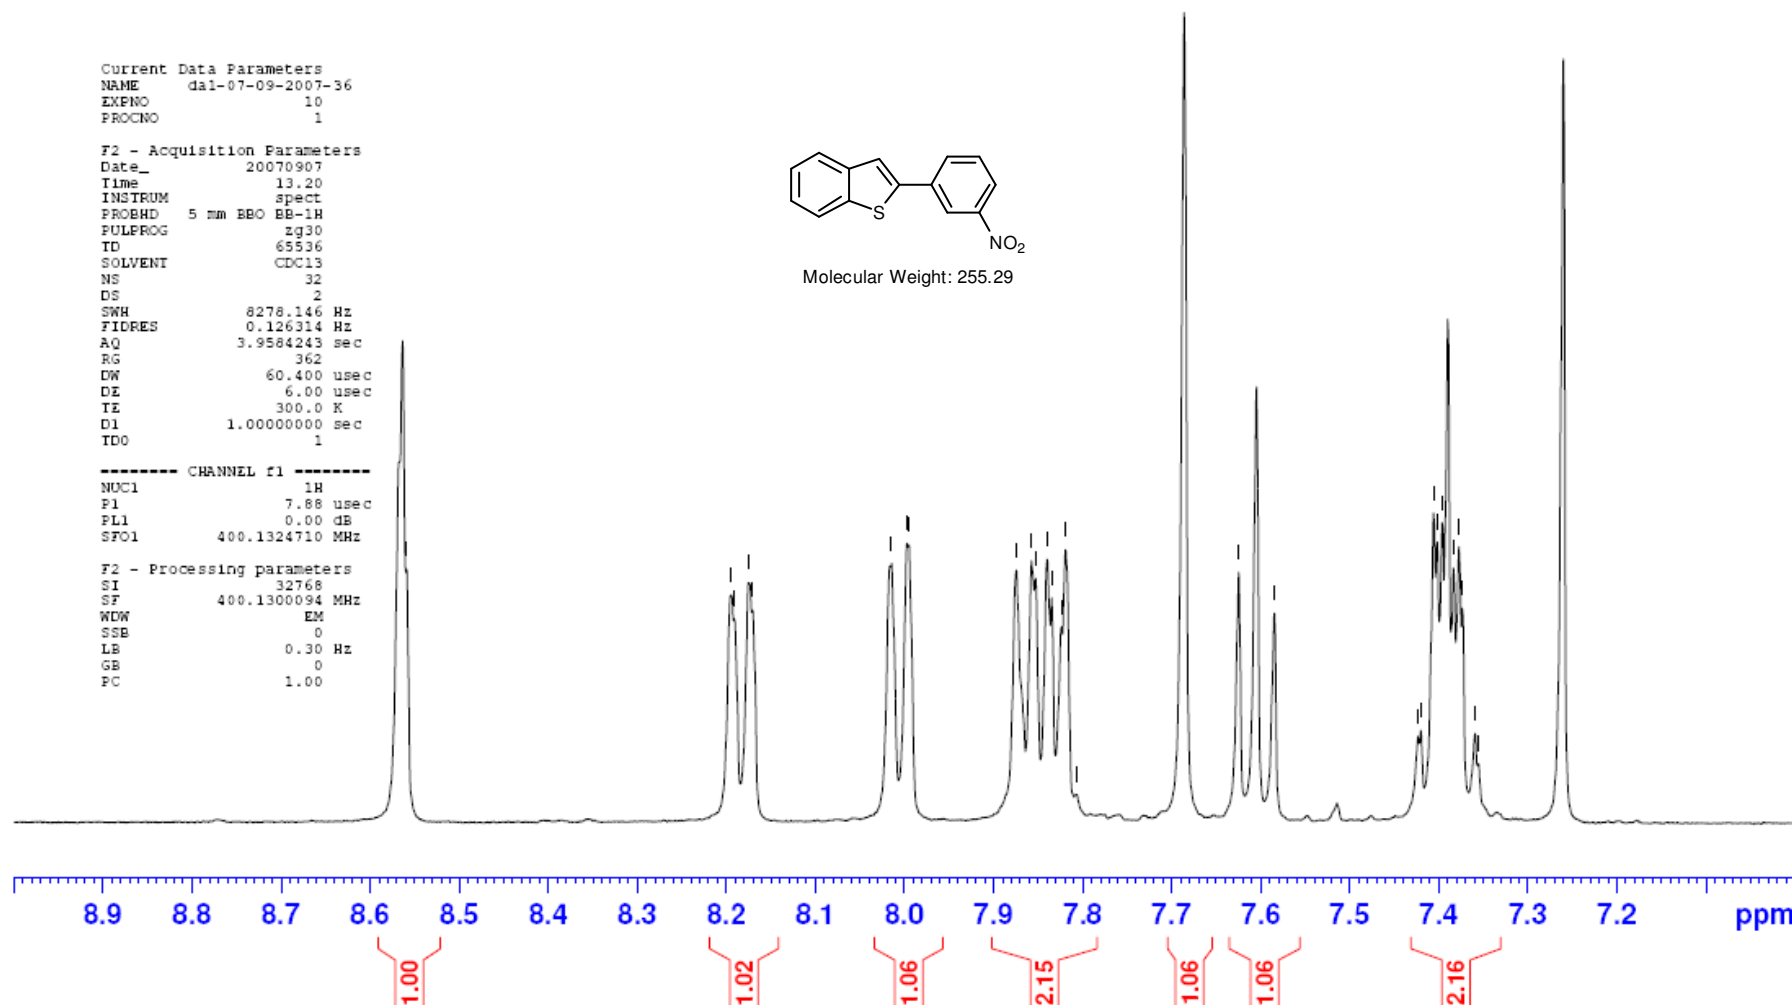

Sample Ref 2-B(OH)2 + 3-NO2

Current Data Parameters  
NAME dal-07-09-2007-36  
EXFNO 12  
PROCNO 1

F2 - Acquisition Parameters  
Date\_ 20070910  
Time 14.47  
INSTRUM spect  
PROBHD 5 mm BBO BB-1H  
PULPROG zgpg30  
TD 65536  
SOLVENT CDCl3  
NS 512  
DS 4  
SWH 23980.814 Hz  
FIDRES 0.365918 Hz  
AQ 1.3664756 sec  
RG 5160.6  
CW 20.850 usec  
DE 6.00 usec  
TE 300.0 K  
D1 1.00000000 sec  
d11 0.03000000 sec  
DELTA 0.89999998 sec  
TD0 1

===== CHANNEL f1 =====  
NUC1 13C  
P1 7.65 usec  
PL1 0.00 dB  
SFO1 100.6228298 MHz

===== CHANNEL f2 =====  
CPDPRG2 waltz16  
NUC2 1H  
PCPD2 75.00 usec  
PL2 0.00 dB  
PL12 20.00 dB  
PL13 20.00 dB  
SFO2 400.1316005 MHz

F2 - Processing parameters  
SI 32768  
SF 100.6127690 MHz  
WDW EM  
SSB 0  
LB 1.00 Hz  
GB 0  
PC 1.40

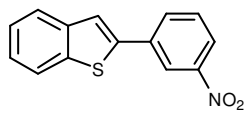

Molecular Weight: 255.29

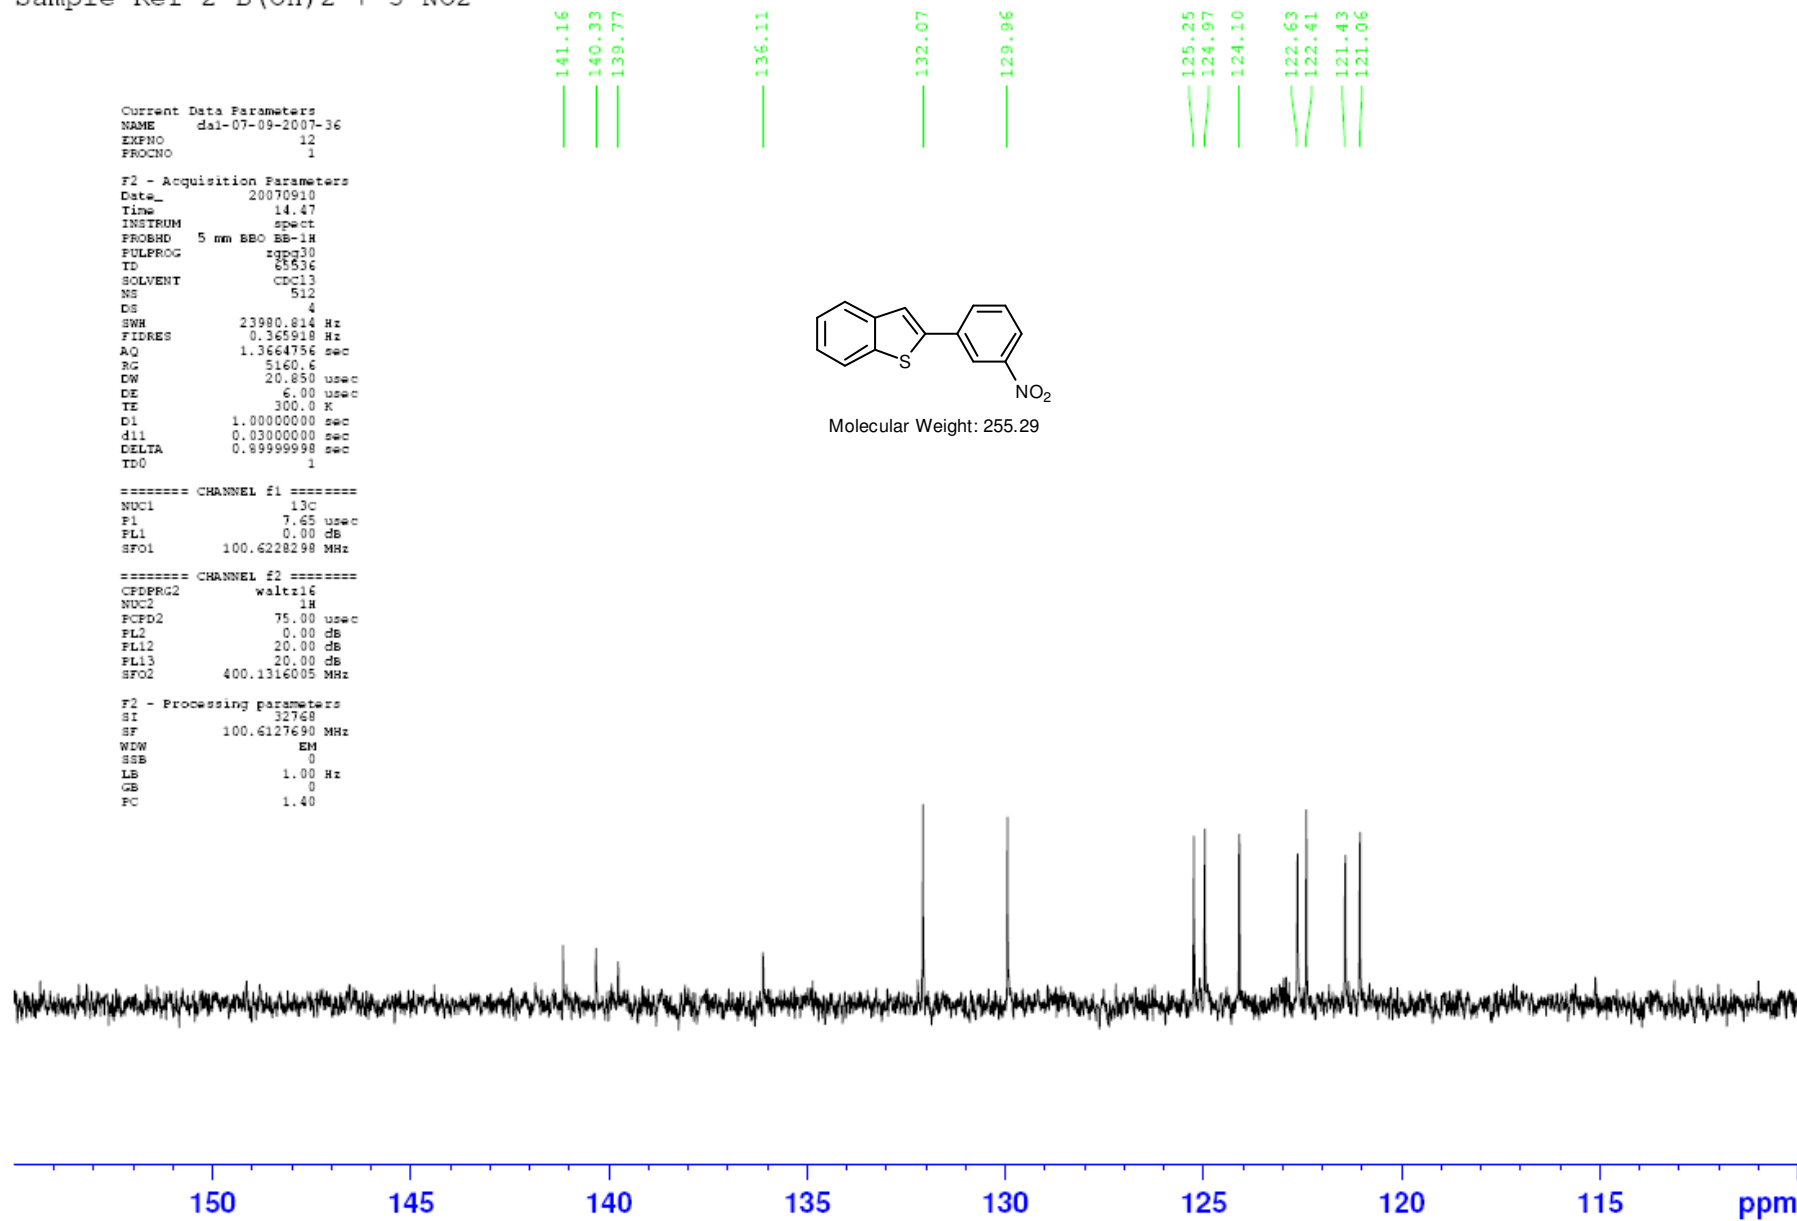

Sample Ref 2-B(OH)2 + 3-NO2

Current Data Parameters  
NAME dal-07-09-2007-36  
EXPNO 16  
PROCNO 1

F2 - Acquisition Parameters  
Date\_ 20070910  
Time 20.15  
INSTRUM spect  
PROBHD 5 mm BBO BB-1H  
PULPROG noesyph  
TD 2048  
SOLVENT CDCl3  
NS 4  
DS 4  
SWH 3396.739 Hz  
FIDRES 1.658564 Hz  
AQ 0.3015156 sec  
RG 228.1  
DW 147.200 usec  
DE 6.00 usec  
TE 300.0 K  
d0 0.00013717 sec  
D1 1.08654106 sec  
D8 0.80000001 sec  
IN0 0.00029440 sec  
ST1CNT 128

----- CHANNEL f1 -----  
NUC1 1H  
P1 7.88 usec  
PL1 0.00 dB  
SFO1 400.1319825 MHz

F1 - Acquisition parameters  
ND0 1  
TD 256  
SFO1 400.132 MHz  
FIDRES 13.268512 Hz  
SW 8.489 ppm  
FrMODE States-TPPI

F2 - Processing parameters  
SI 1024  
SF 400.1300000 MHz  
WDW QSINE  
SSB 2  
LB 0.00 Hz  
GB 0  
PC 1.00

F1 - Processing parameters  
SI 1024  
MC2 States-TPPI  
SF 400.1300000 MHz  
WDW QSINE  
SSB 2  
LB 0.00 Hz  
GB 0

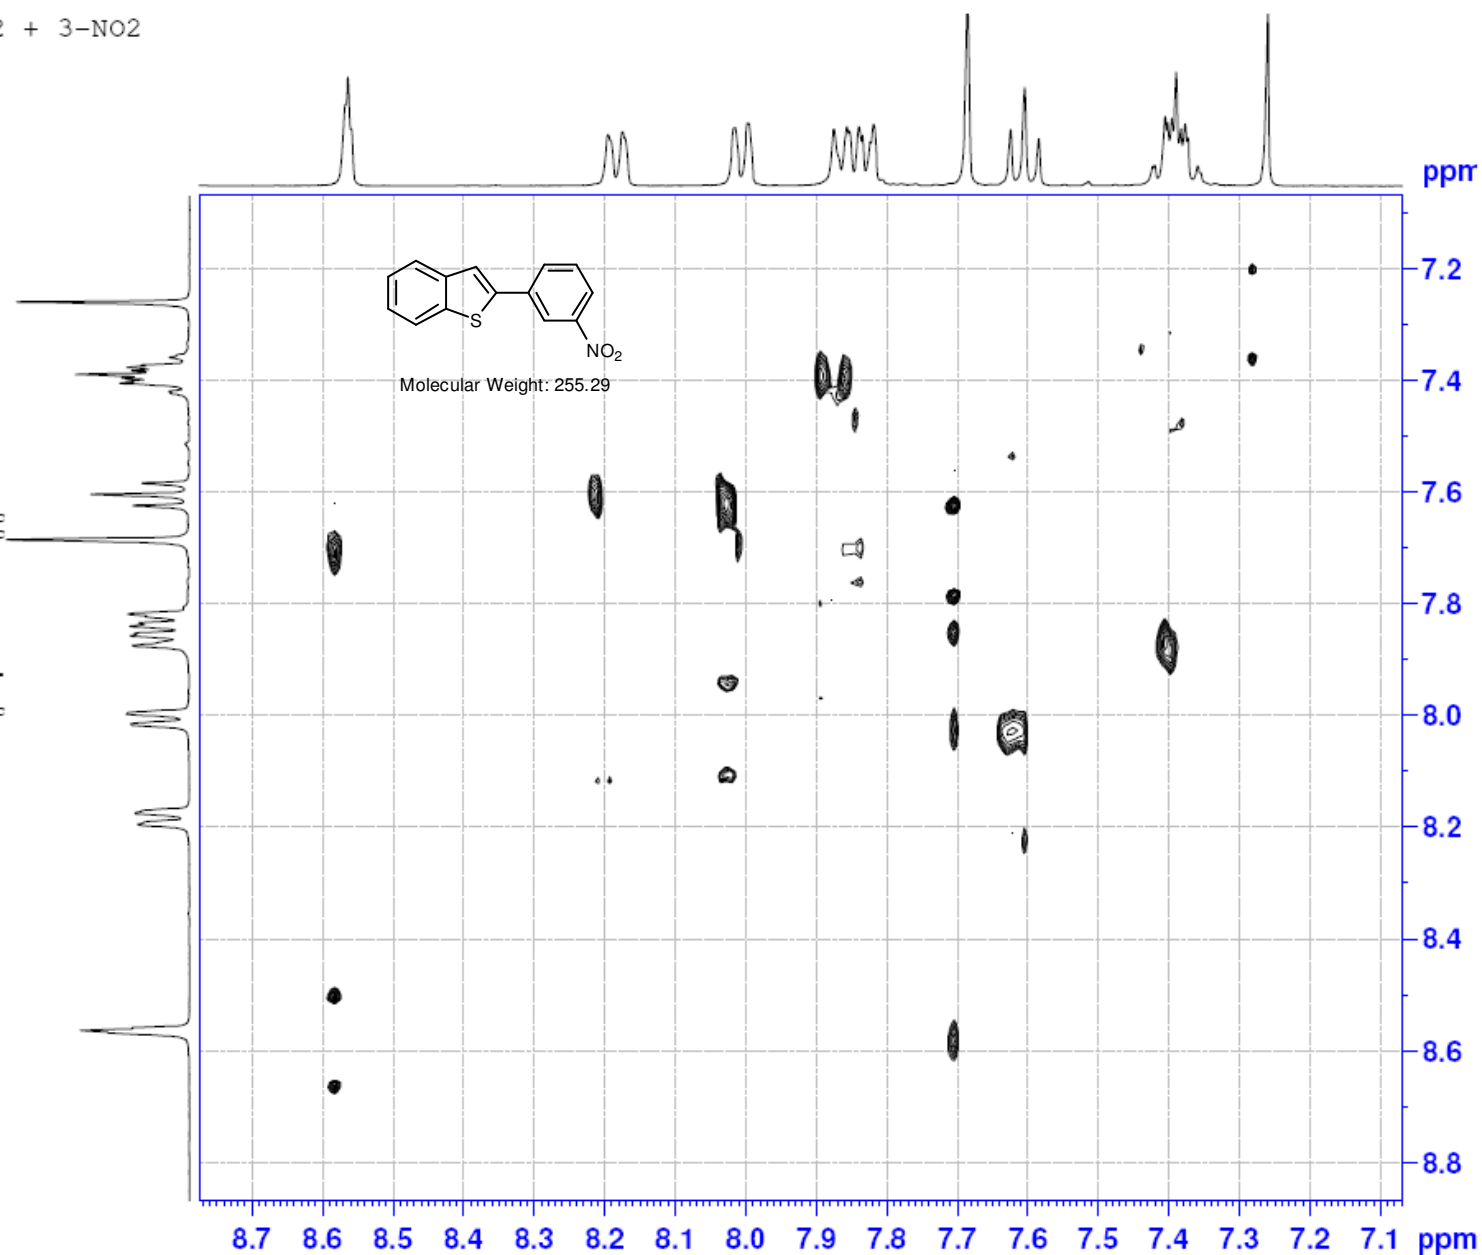

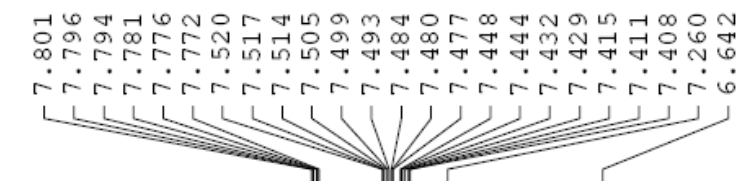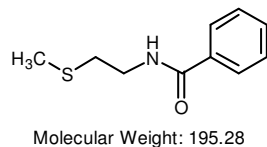

Sample Ref 001-DA-078-02  
001-DA-078-02

Current Data Parameters  
NAME dal-17-02-2009-16  
EXPNO 10  
PROCNO 1

F2 - Acquisition Parameters  
Date\_ 20090217  
Time 14.45  
INSTRUM spect  
PROBHD 5 mm BBO BB-1H  
PULPROG zg30  
TD 65536  
SOLVENT CDCl3  
NS 64  
DS 2  
SWH 8278.146 Hz  
FIDRES 0.126314 Hz  
AQ 3.9584243 sec  
RG 256  
DW 60.400 usec  
DE 6.00 usec  
TE 300.1 K  
D1 1.00000000 sec  
TD0 1

===== CHANNEL f1 =====  
NUC1 1H  
P1 7.69 usec  
PL1 0.00 dB  
SFO1 400.1324710 MHz

F2 - Processing parameters  
SI 32768  
SF 400.1300093 MHz  
WDW EM  
SSB 0  
LB 0.30 Hz  
GB 0  
PC 1.00

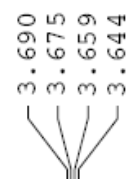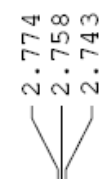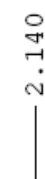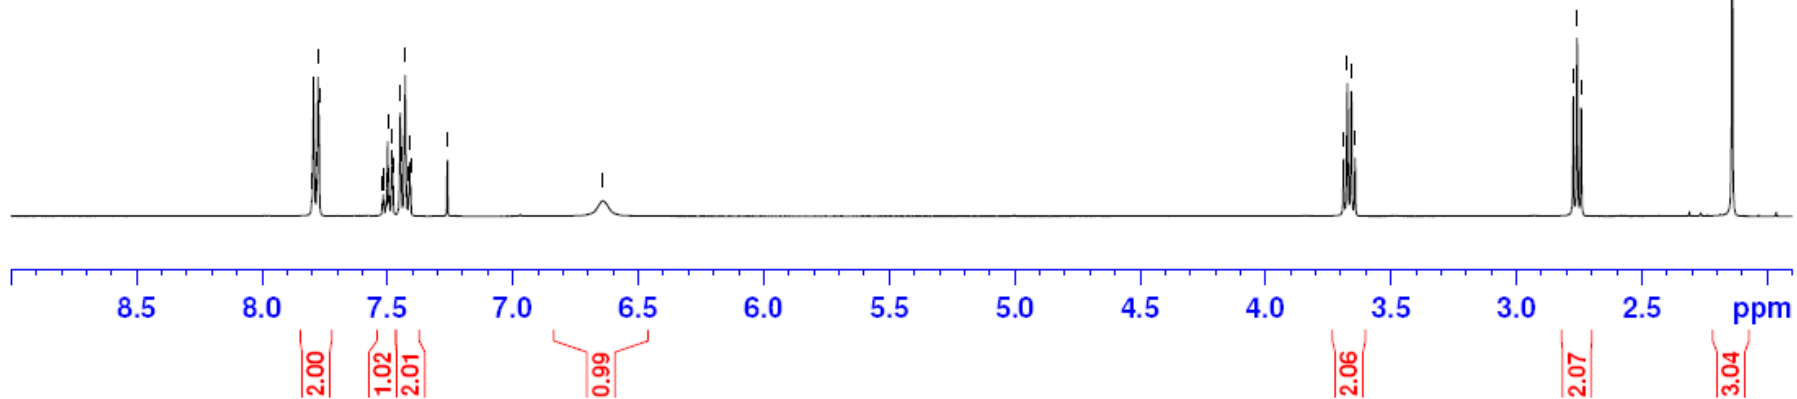

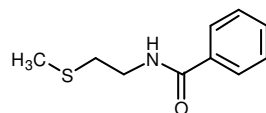

Molecular Weight: 195.28

Sample Ref 001-DA-078-02  
001-DA-078-02

Current Data Parameters  
NAME dal-17-02-2009-16  
EXPNO 12  
PROCNO 1

F2 - Acquisition Parameters  
Date\_ 20090218  
Time 0.43  
INSTRUM spect  
PROBHD 5 mm BBO BB-1H  
PULPROG zgpg30  
TD 65536  
SOLVENT CDCl3  
NS 1024  
DS 4  
SWH 23980.814 Hz  
FIDRES 0.365918 Hz  
AQ 1.3664756 sec  
RG 2298.8  
LW 20.850 usec  
DE 6.00 usec  
TE 300.0 K  
D1 1.00000000 sec  
d11 0.03000000 sec  
DELTA 0.89999998 sec  
ID0 1

----- CHANNEL f1 -----  
NUC1 13C  
P1 7.87 usec  
PL1 0.00 dB  
SFO1 100.6228298 MHz

----- CHANNEL f2 -----  
CPDPRG2 waltz16  
NUC2 1H  
PCPD2 80.00 usec  
PL2 0.00 dB  
PL12 20.00 dB  
PL13 20.00 dB  
SFO2 400.1314003 MHz

F2 - Processing parameters  
SI 32768  
SF 100.6127690 MHz  
WDW EM  
SSB 0  
LB 1.00 Hz  
GB 0  
PC 1.40

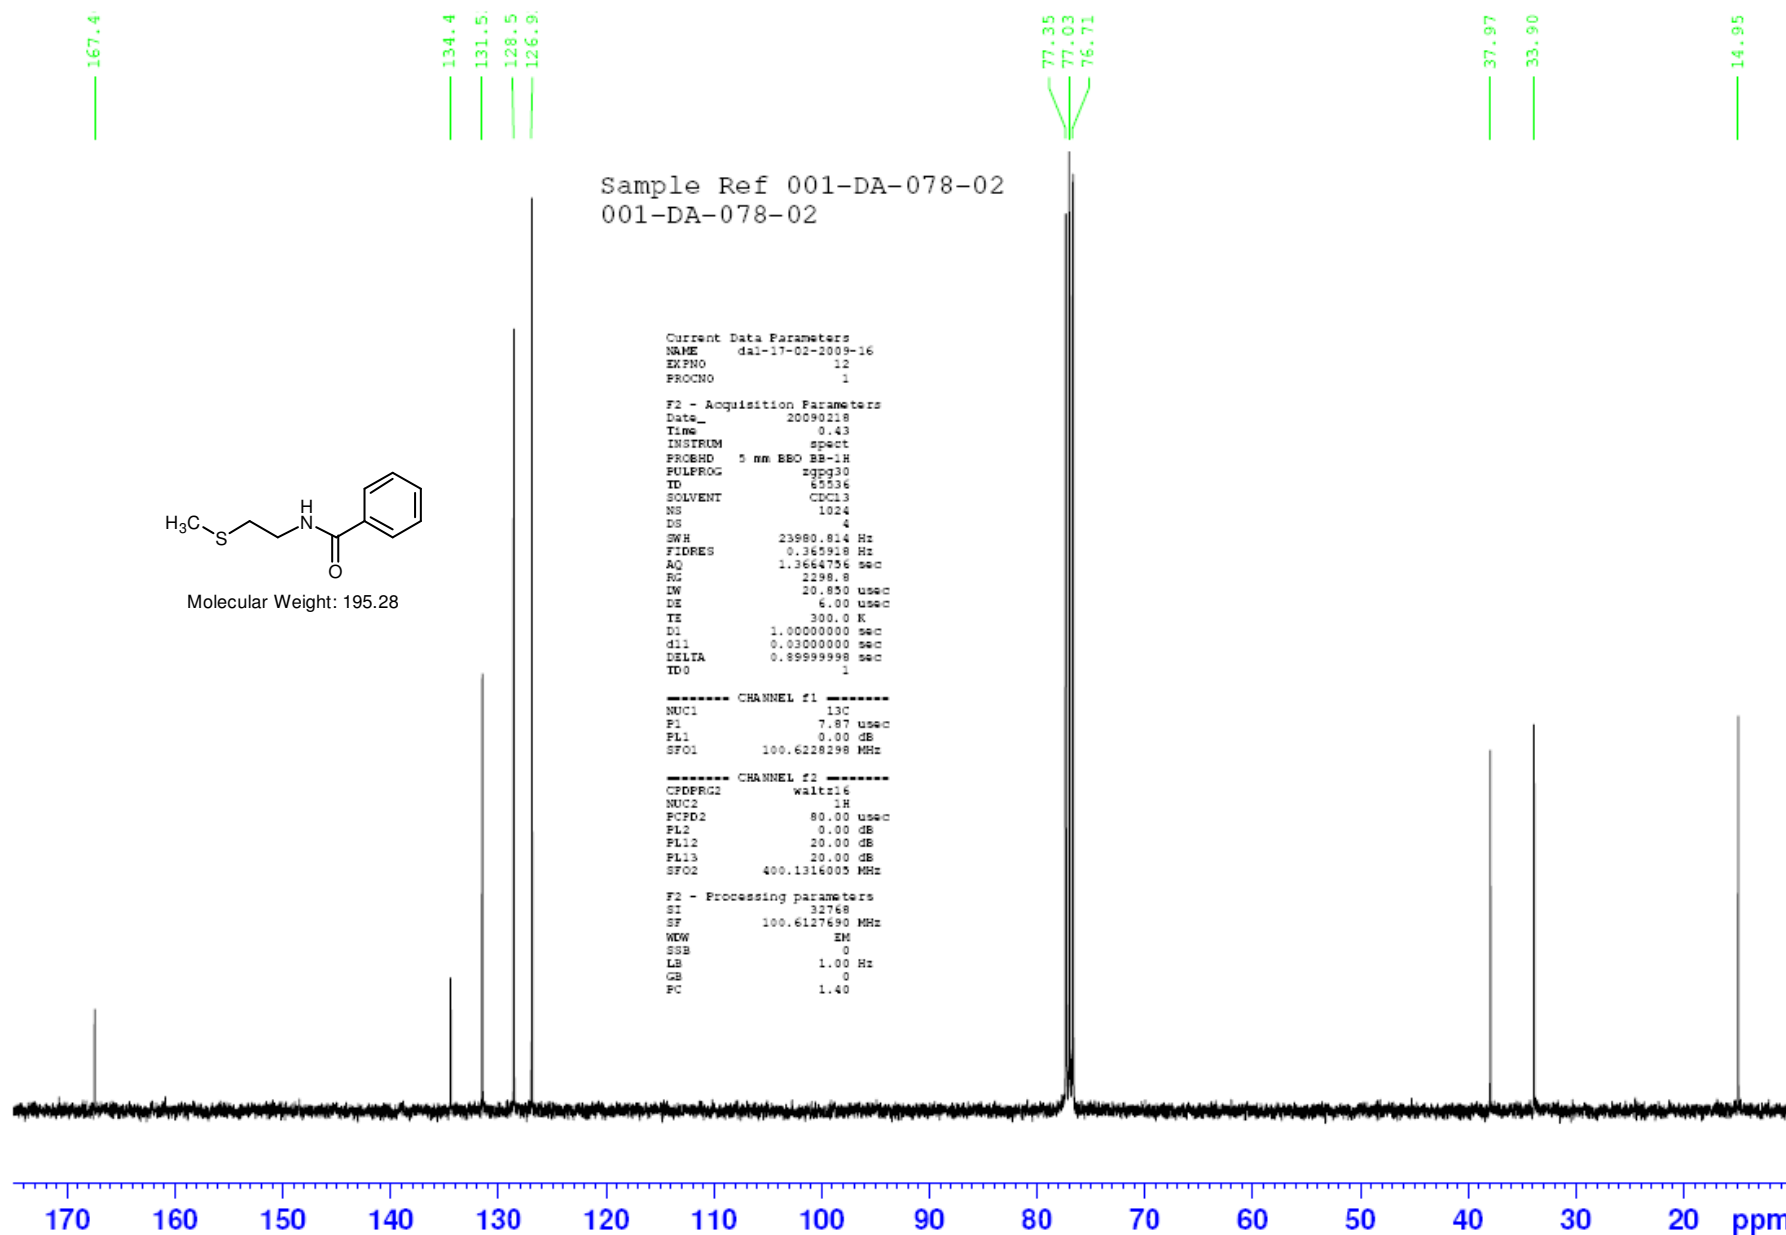



7.437  
7.415  
7.366  
7.260  
7.233  
7.211

Sample Ref 001-DA-078-01  
001-DA-078-01

Current Data Parameters  
NAME dal-17-02-2009-15  
EXPNO 10  
PROCNO 1

F2 - Acquisition Parameters  
Date\_ 20090217  
Time 14.19  
INSTRUM spect  
PROBHD 5 mm BBO BB-1H  
PULPROG zg30  
TD 65536  
SOLVENT CDCl3  
NS 64  
DS 2  
SWH 8278.146 Hz  
FIDRES 0.126314 Hz  
AQ 3.9584243 sec  
RG 287.4  
DW 60.400 usec  
DE 6.00 usec  
TE 300.1 K  
D1 1.00000000 sec  
TD0 1

===== CHANNEL f1 =====  
NUC1 1H  
P1 7.88 usec  
PL1 0.00 dB  
SFO1 400.1324710 MHz

F2 - Processing parameters  
SI 32768  
SF 400.1300095 MHz  
WDW EM  
SSB 0  
LB 0.30 Hz  
GB 0  
PC 1.00

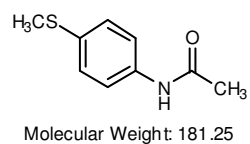

2.456  
2.154

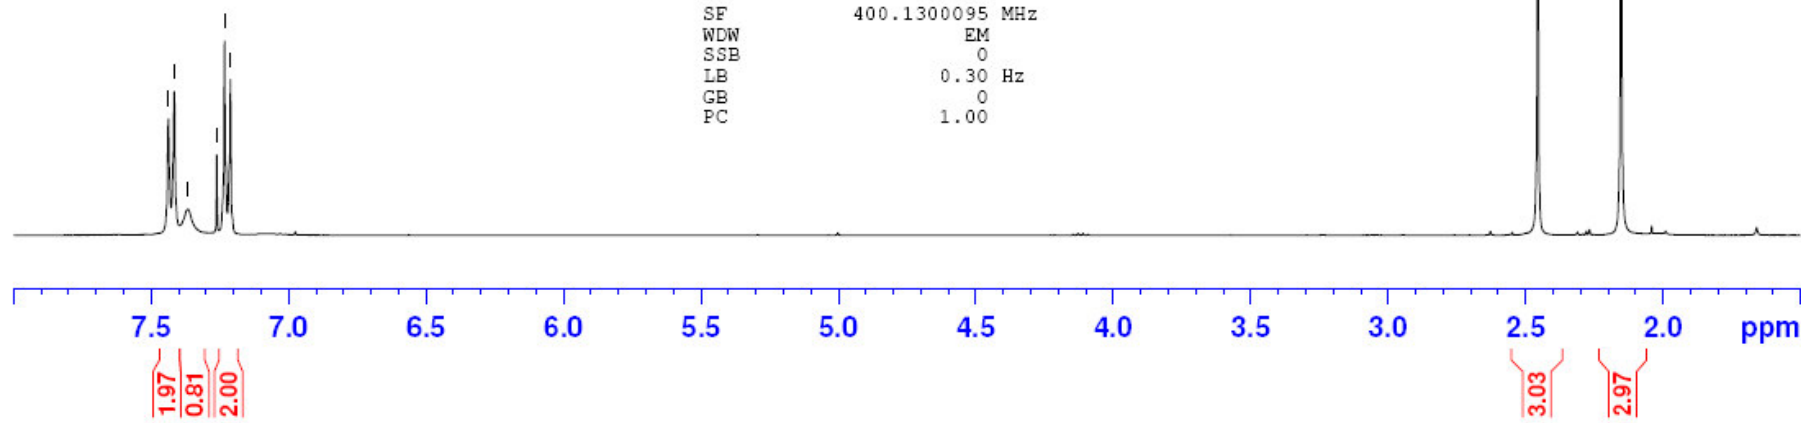

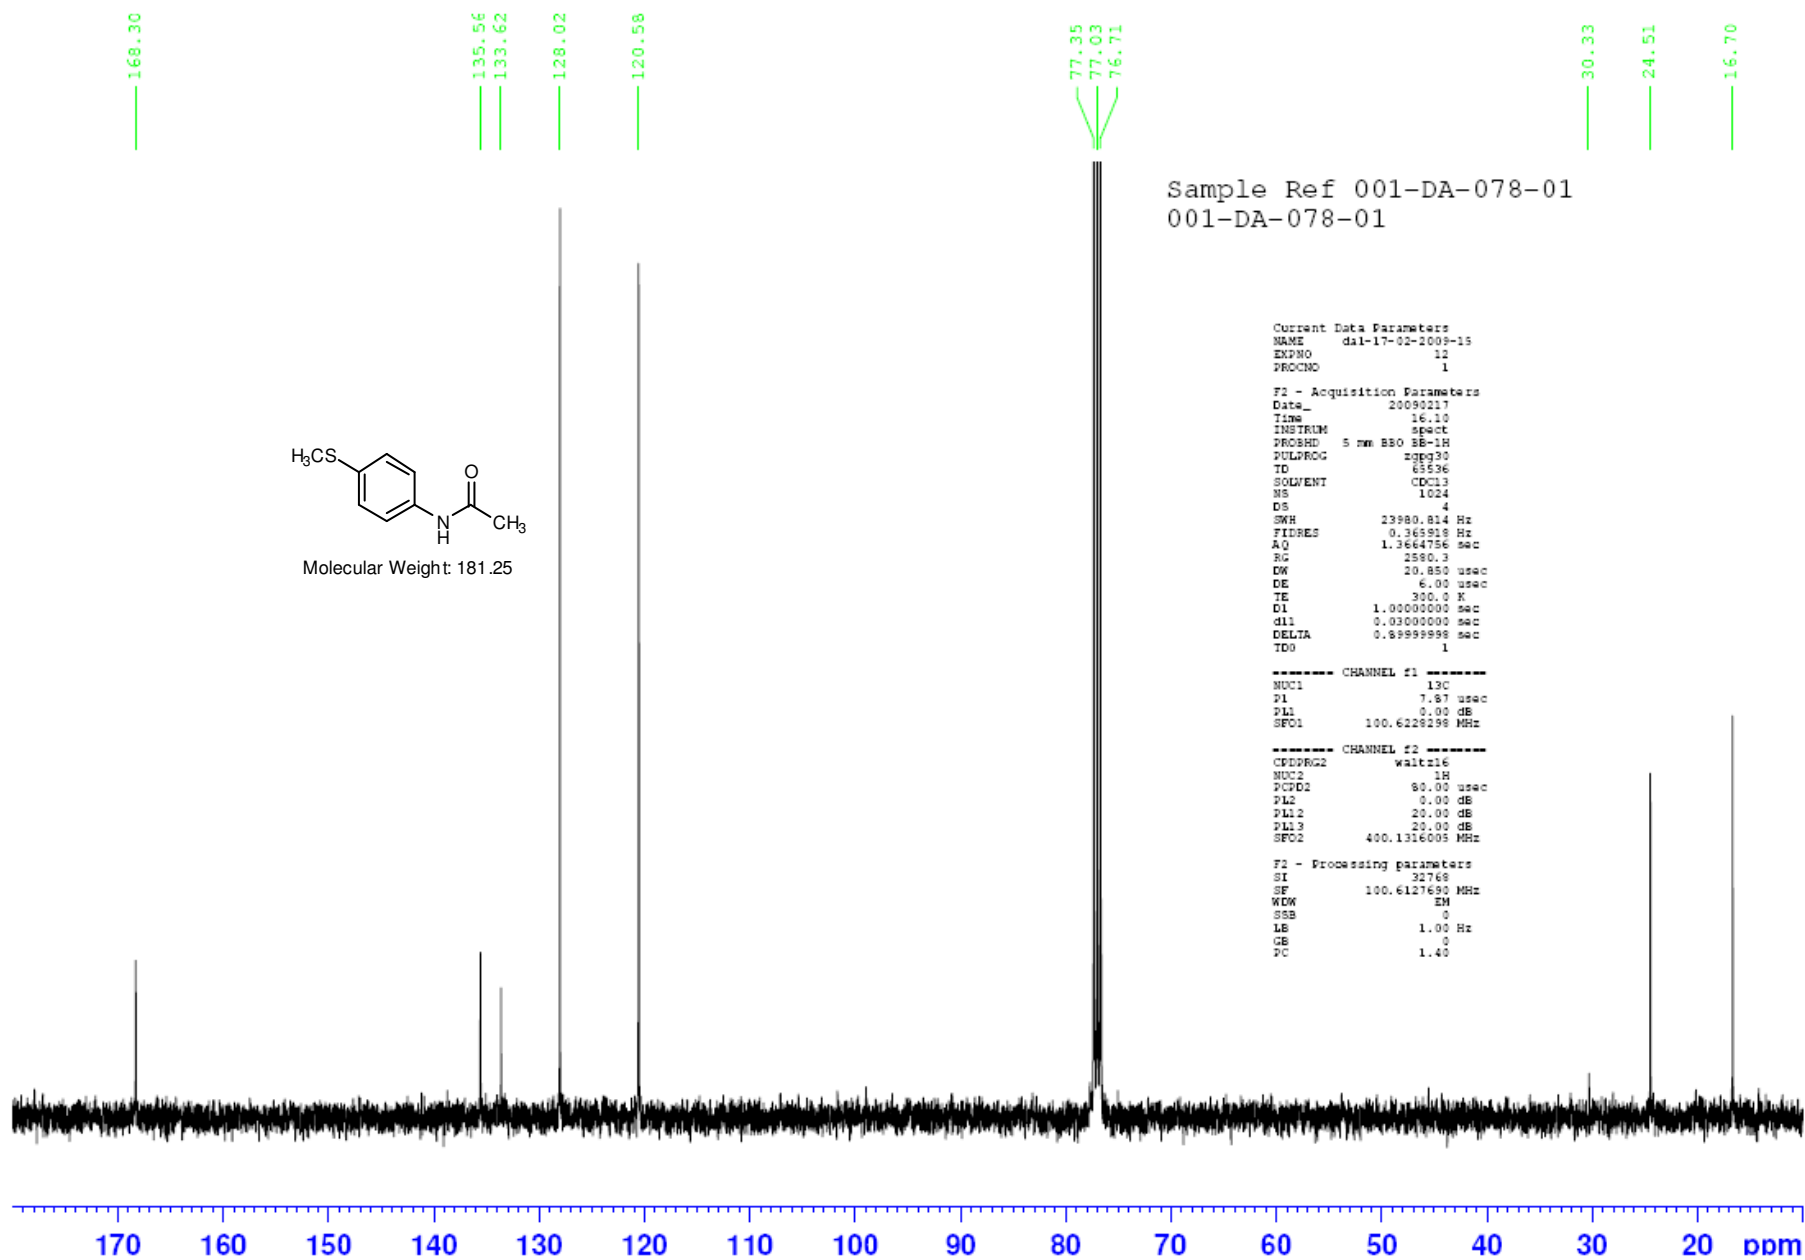

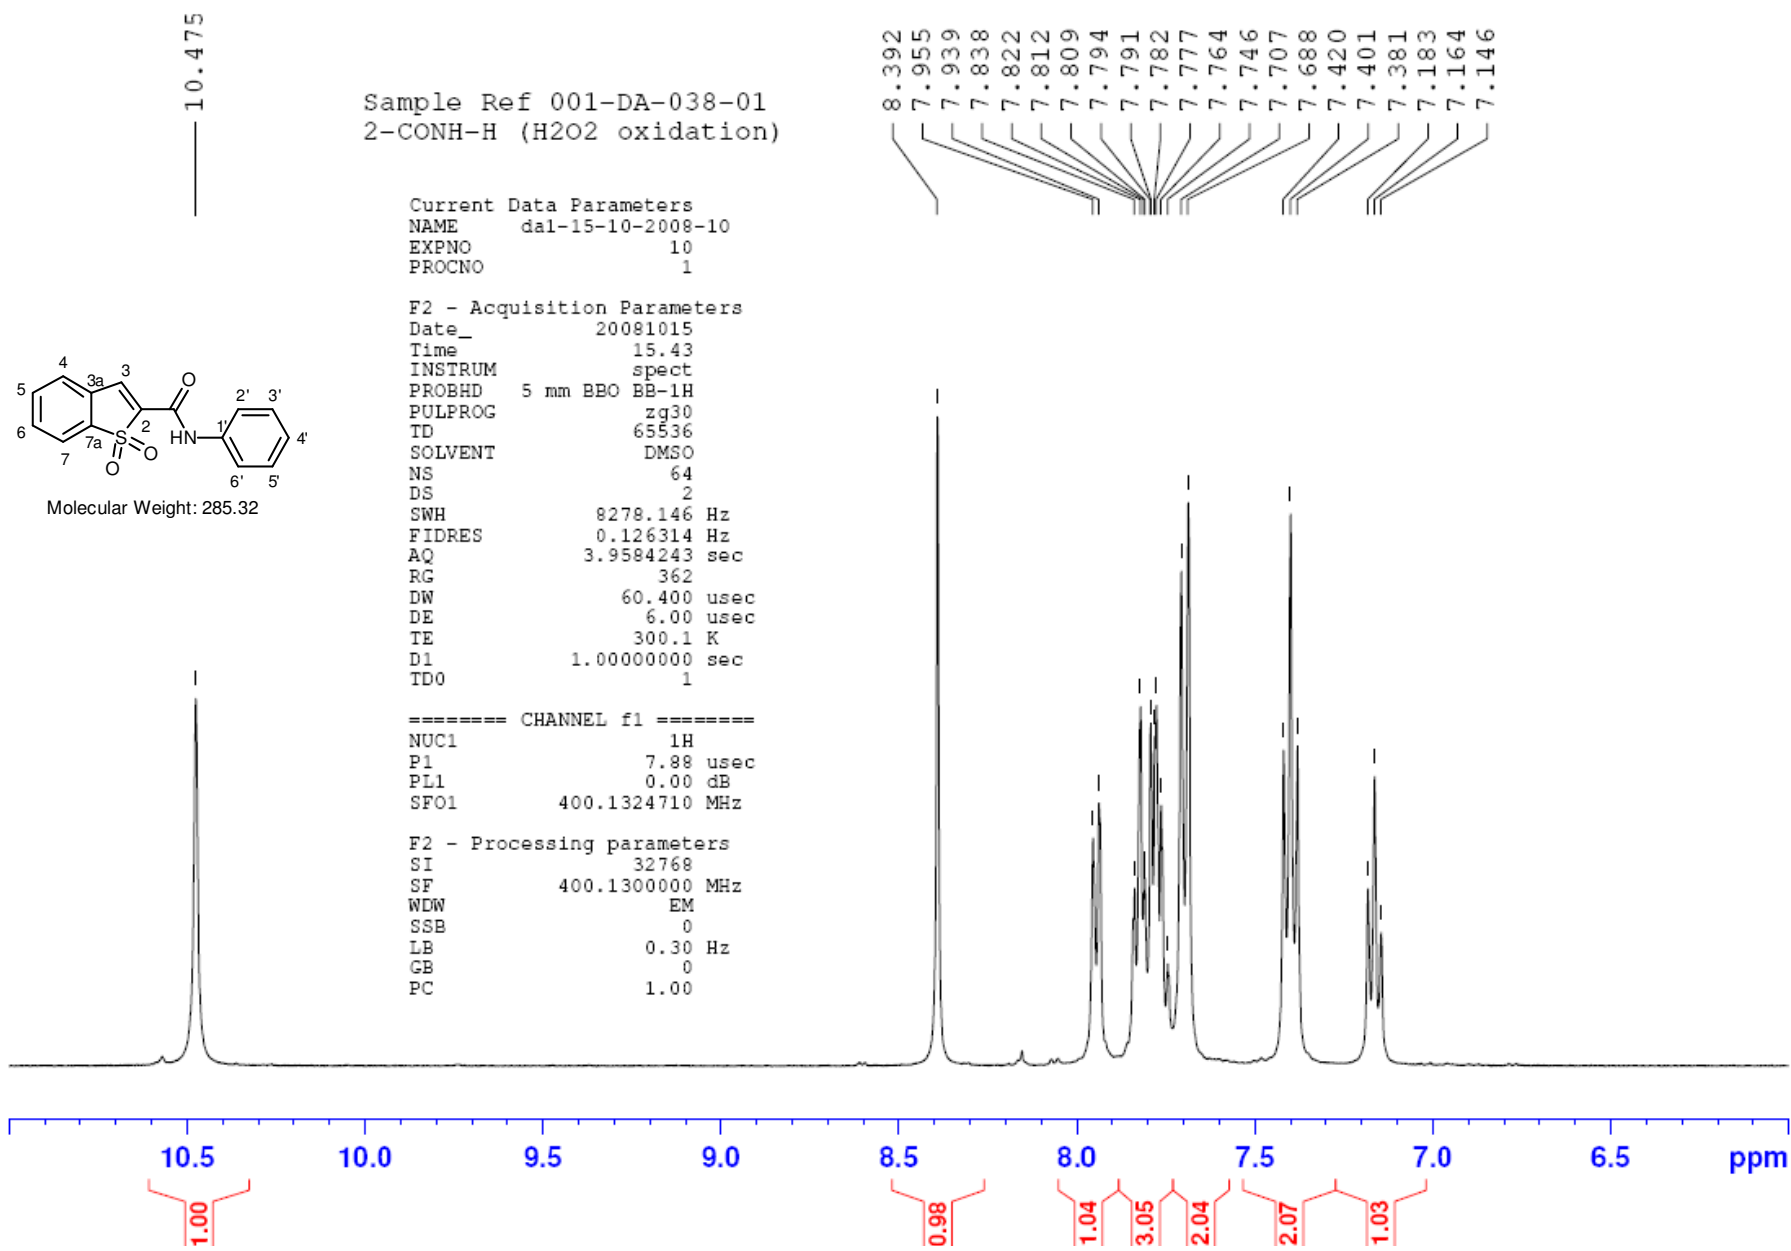

Sample Ref 001-DA-038-01  
2-CONH-H (H2O2 oxidation)

Current Data Parameters  
NAME dal-15-10-2008-10  
EXPNO 12  
PROCNO 1

F2 - Acquisition Parameters  
Date\_ 20081016  
Time 2.20  
INSTRUM spect  
PROBHD 5 mm BBO BB-1H  
PULPROG zgpg30  
ID 65536  
SOLVENT DMSO  
NS 1024  
DS 4  
SWH 23980.814 Hz  
FIDRES 0.365918 Hz  
AQ 1.3664756 sec  
RG 1290.2  
DW 20.850 usec  
DE 6.00 usec  
TE 300.1 K  
D1 1.00000000 sec  
d11 0.03000000 sec  
DELTA 0.89999998 sec  
TD0 1

----- CHANNEL f1 -----  
NUC1 13C  
P1 7.87 usec  
PL1 0.00 dB  
SFO1 100.6228298 MHz

----- CHANNEL f2 -----  
CPDPRG2 waltz16  
NUC2 1H  
PCPD2 80.00 usec  
PL2 0.00 dB  
PL12 20.00 dB  
PL13 20.00 dB  
SFO2 400.1316005 MHz

F2 - Processing parameters  
SI 32768  
SF 100.6128193 MHz  
WDW EM  
SSB 0  
LB 1.00 Hz  
GB 0  
PC 1.40

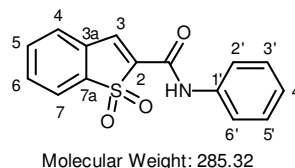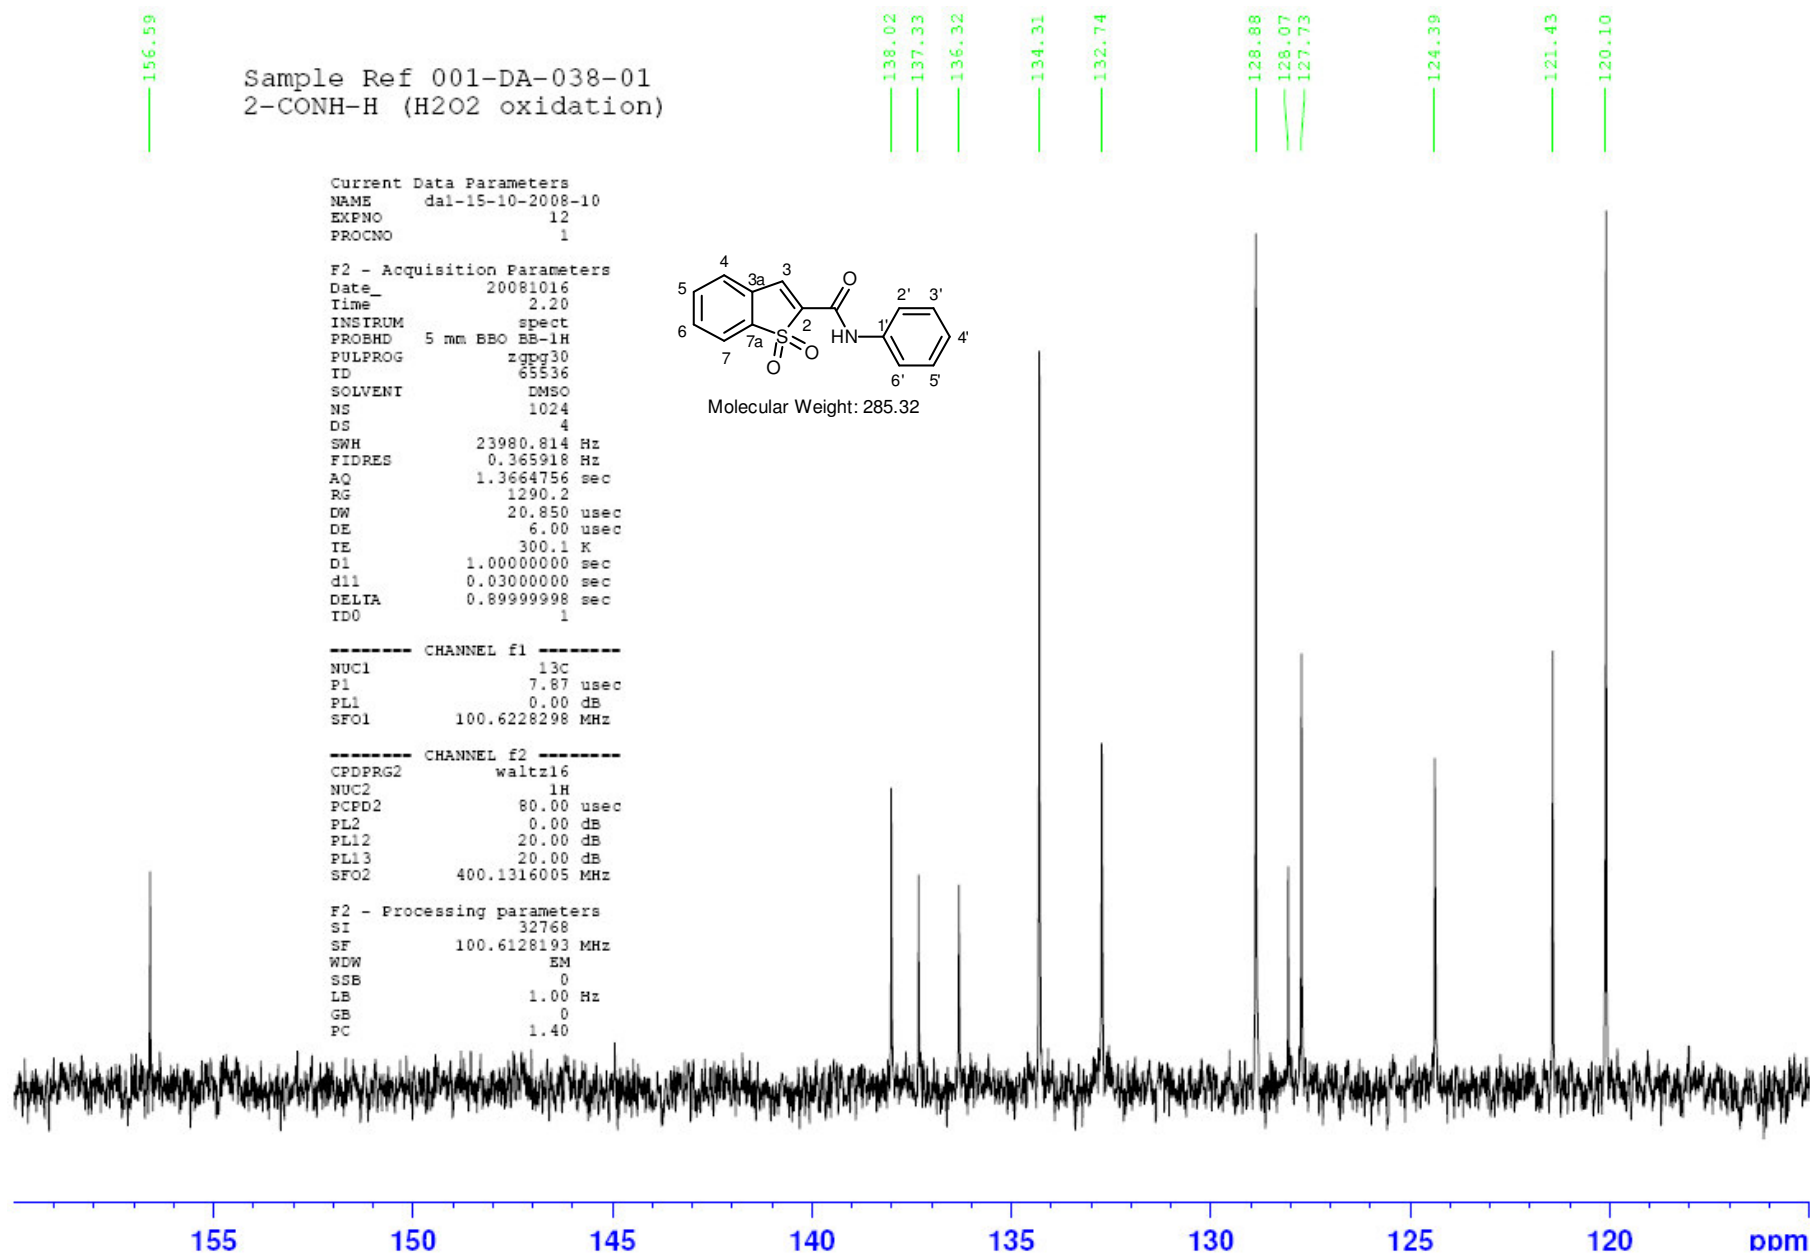

Sample Ref 001-DA-038-01  
2-CONH-H (H2O2 oxidation)

Current Data Parameters  
NAME dal-15-10-2008-10  
EXPNO 16  
PROCNO 1

F2 - Acquisition Parameters  
Date\_ 20081016  
Time 3.48  
INSTRUM spect  
PROBHD 5 mm BBO BB-1H  
PULPROG noesyph  
TD 2048  
SOLVENT DMSO  
NS 4  
DS 4  
SWH 3955.696 Hz  
FIDRES 1.931492 Hz  
AQ 0.2589172 sec  
RG 256  
DW 126.400 usec  
DE 6.00 usec  
TE 300.1 K  
d0 0.00011637 sec  
D1 1.25816202 sec  
D8 0.80000001 sec  
IN0 0.00025280 sec  
ST1CNT 128

----- CHANNEL f1 -----  
NUC1 1H  
P1 7.88 usec  
PL1 0.00 dB  
SFO1 400.1325093 MHz

F1 - Acquisition parameters  
ND0 1  
TD 256  
SFO1 400.1325 MHz  
FIDRES 15.451939 Hz  
SW 9.886 ppm  
FnMODE States-TPPI

F2 - Processing parameters  
SI 1024  
SF 400.1300000 MHz  
WDW QSINE  
SSB 2  
LB 0.00 Hz  
GB 0  
PC 1.00

F1 - Processing parameters  
SI 1024  
MC2 States-TPPI  
SF 400.1300000 MHz  
WDW QSINE  
SSB 2  
LB 0.00 Hz  
GB 0

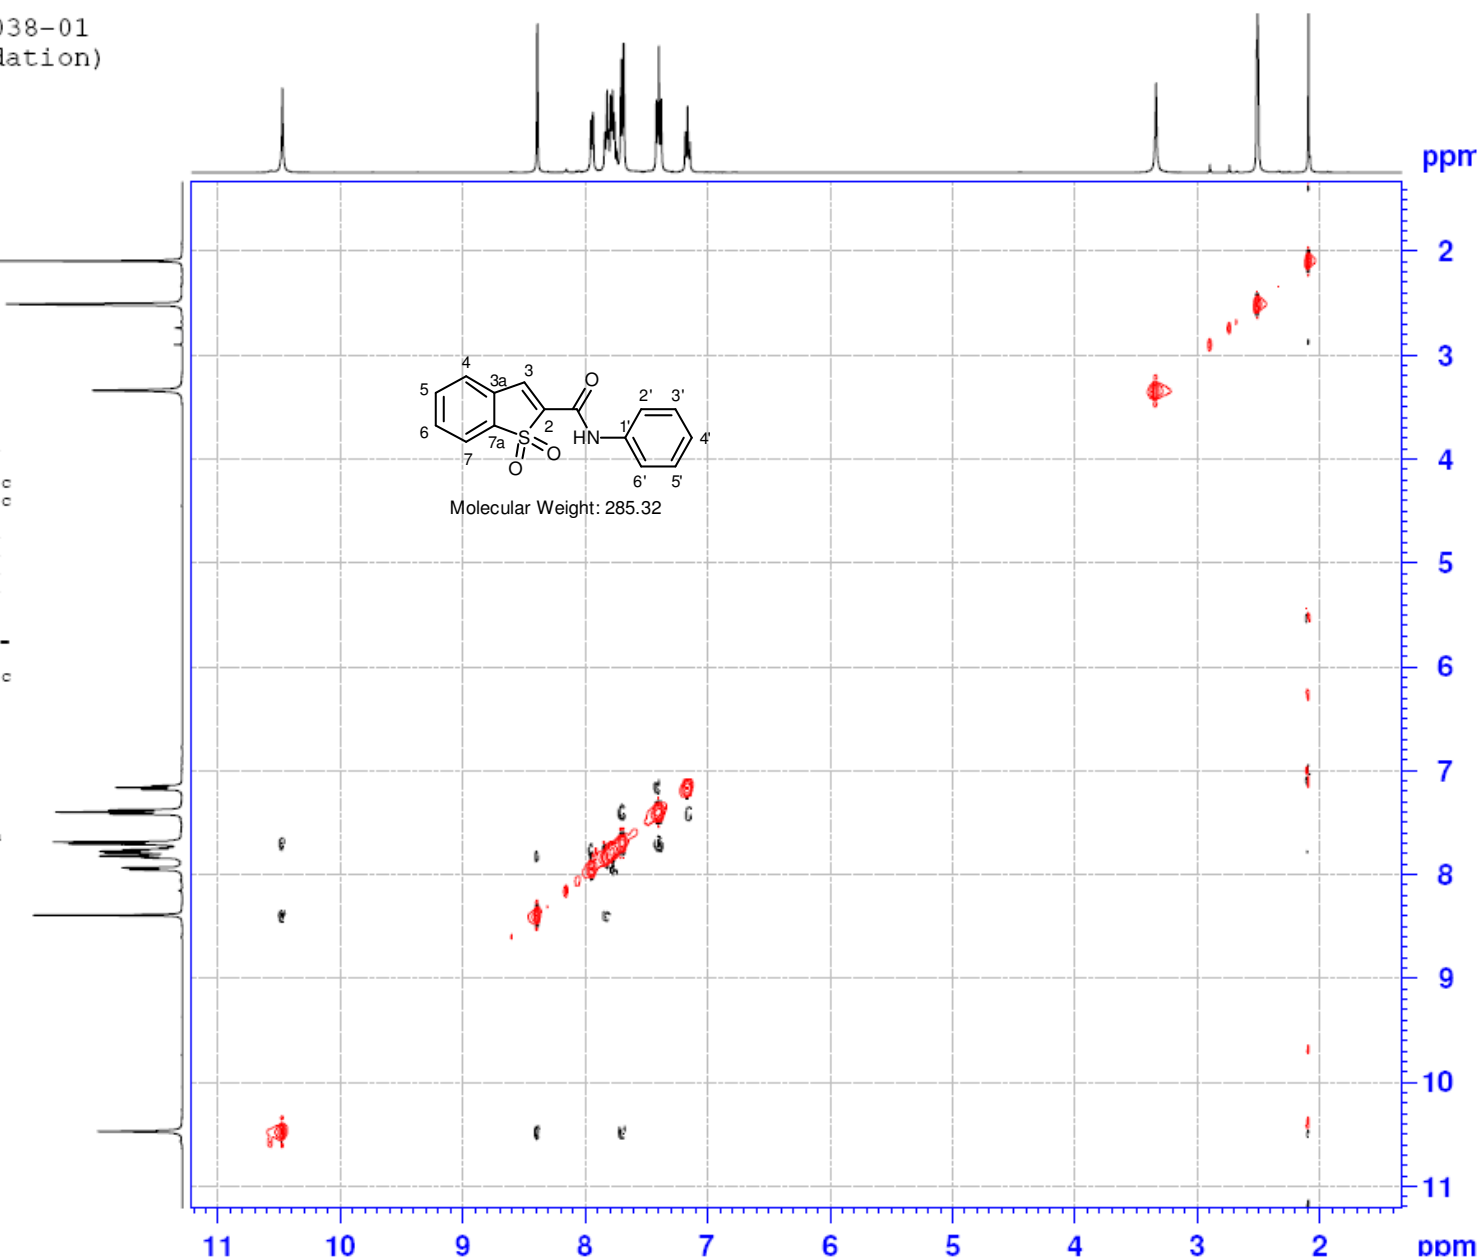

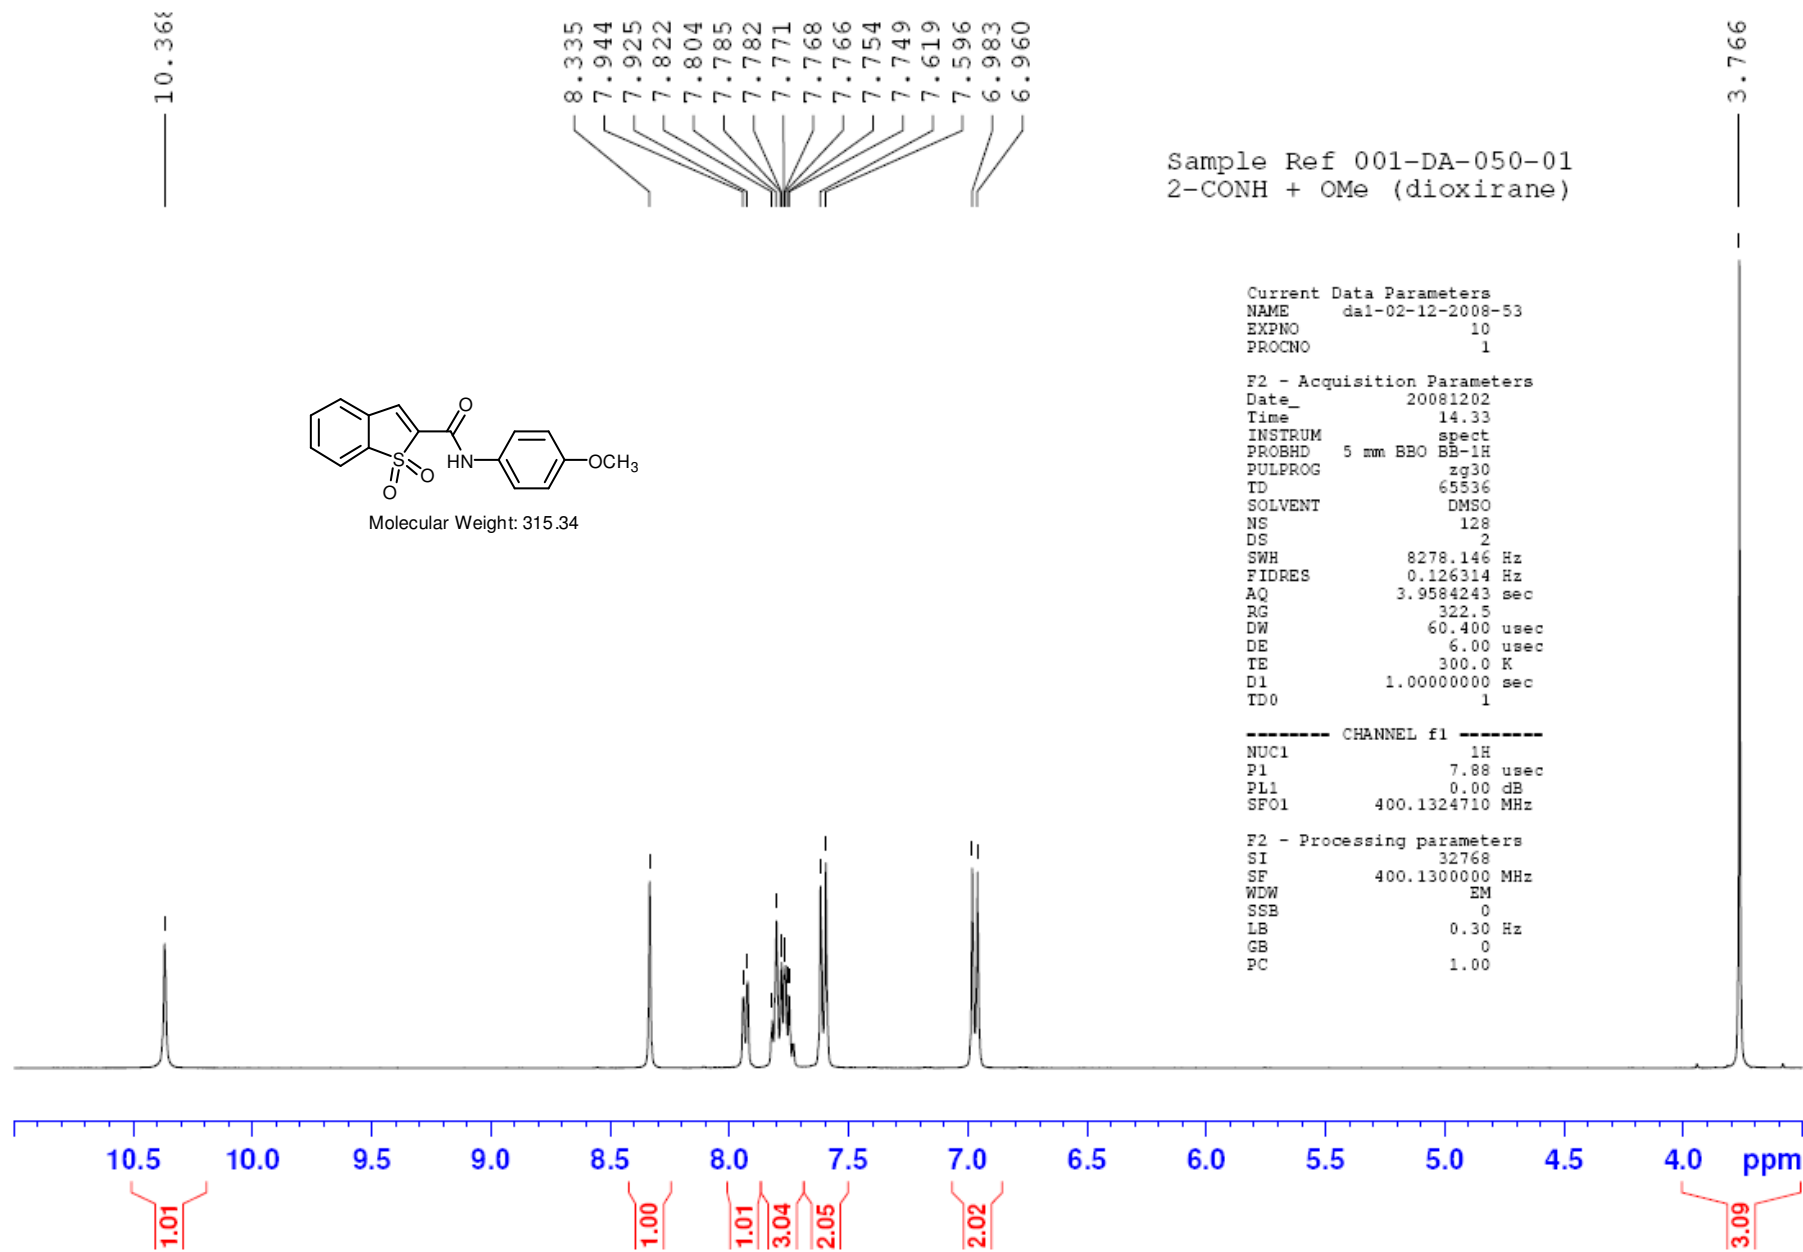

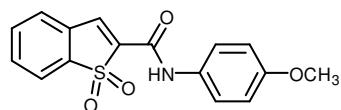

Molecular Weight: 315.34

Sample Ref 001-DA-050-01  
2-CONH + OMe (dioxirane)

Current Data Parameters  
NAME dal-02-12-2008-53  
EXPNO 12  
PROCNO 1

F2 - Acquisition Parameters  
Date\_ 20081202  
Time 16.17  
INSTRUM spect  
PROBHD 5 mm BBO BB-1H  
PULPROG zgpg30  
TD 65536  
SOLVENT DMSO  
NS 2048  
DS 4  
SWH 23980.814 Hz  
FIDRES 0.365918 Hz  
AQ 1.3664756 sec  
RG 5792.6  
DW 20.850 usec  
DE 6.00 usec  
TE 300.0 K  
D1 1.00000000 sec  
d11 0.03000000 sec  
DELTA 0.89999998 sec  
TD0 1

----- CHANNEL f1 -----  
NUC1 13C  
P1 7.87 usec  
PL1 0.00 dB  
SFO1 100.6228298 MHz

----- CHANNEL f2 -----  
CPDPRG2 waltz16  
NUC2 1H  
PCPD2 80.00 usec  
PL2 0.00 dB  
PL12 20.00 dB  
PL13 20.00 dB  
SFO2 400.1316005 MHz

F2 - Processing parameters  
SI 32768  
SF 100.6128193 MHz  
WDW EM  
SSB 0  
LB 1.00 Hz  
GB 0  
PC 1.40

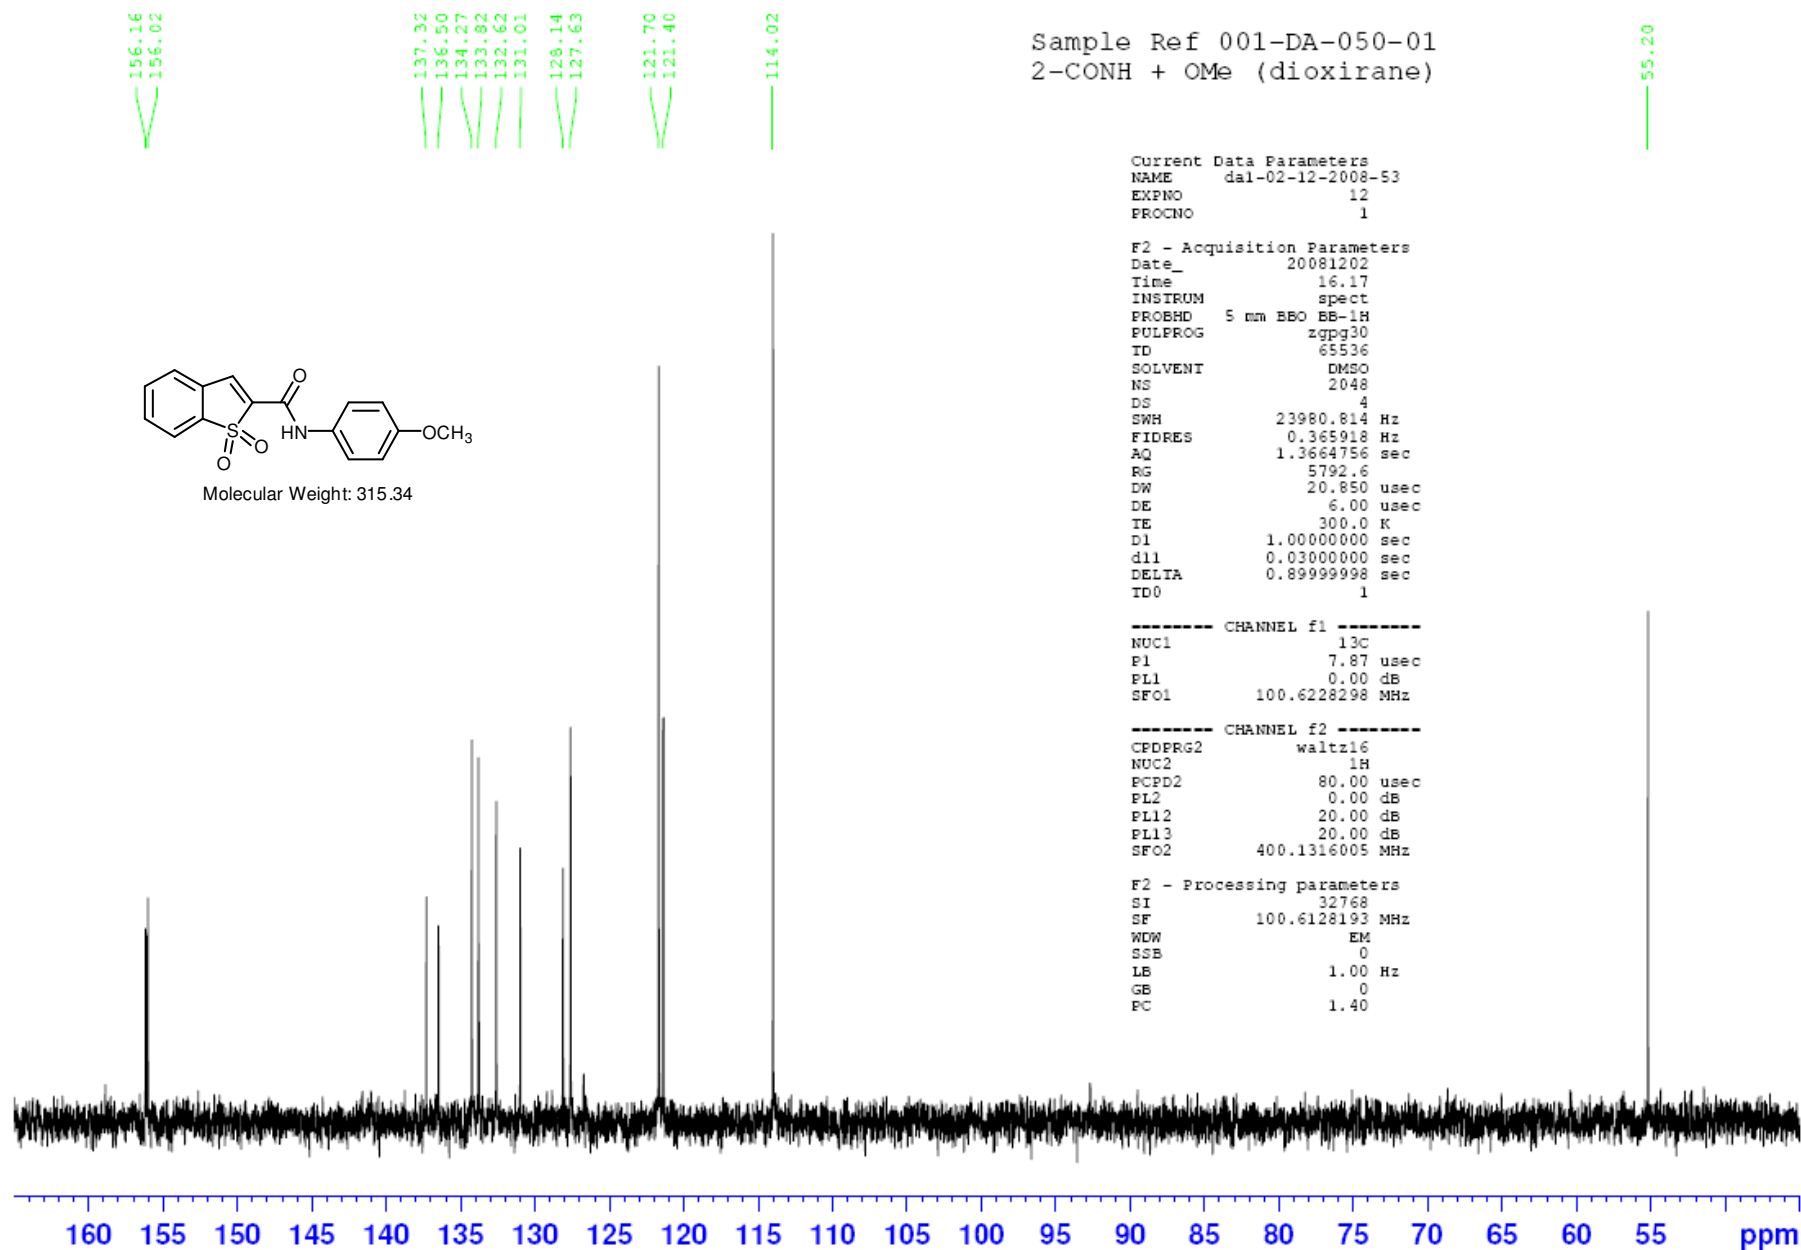

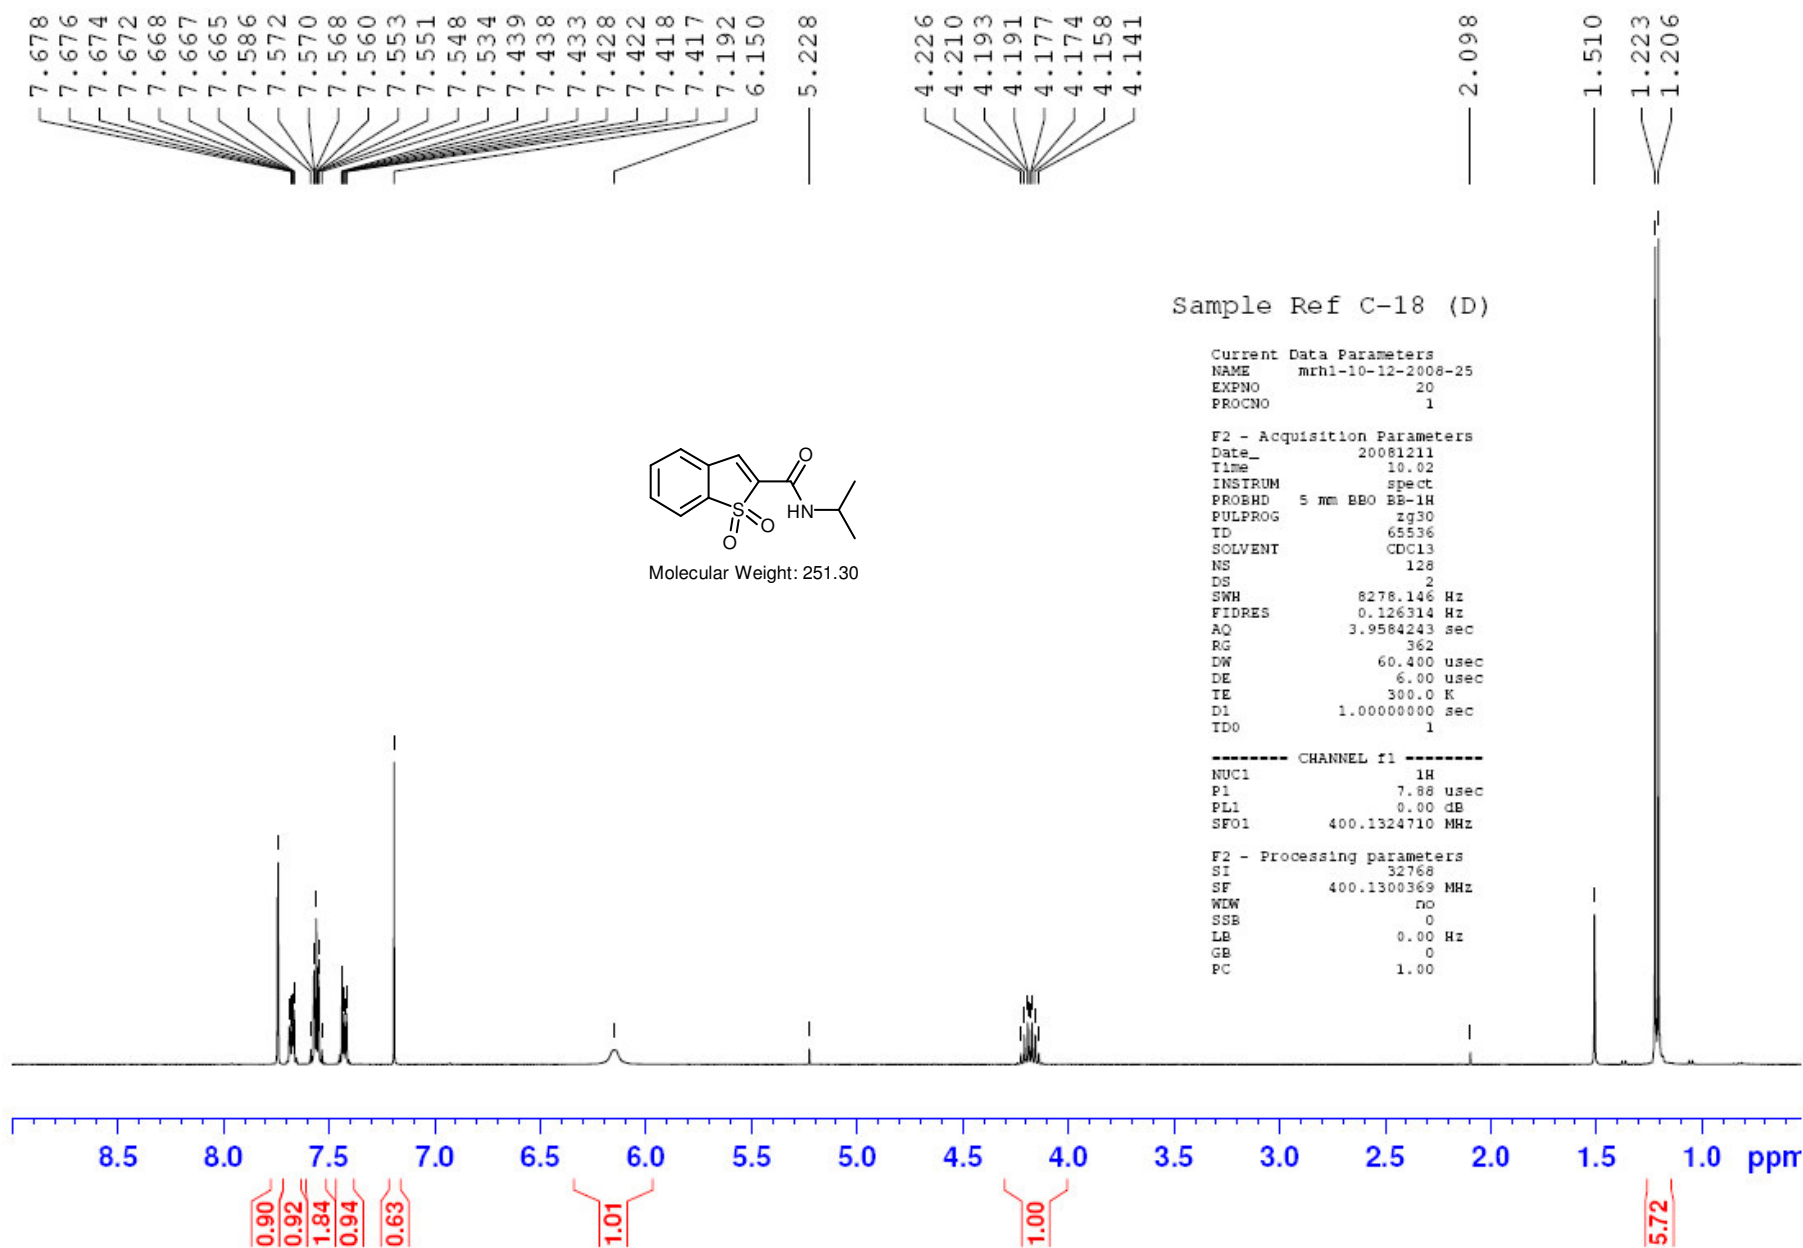



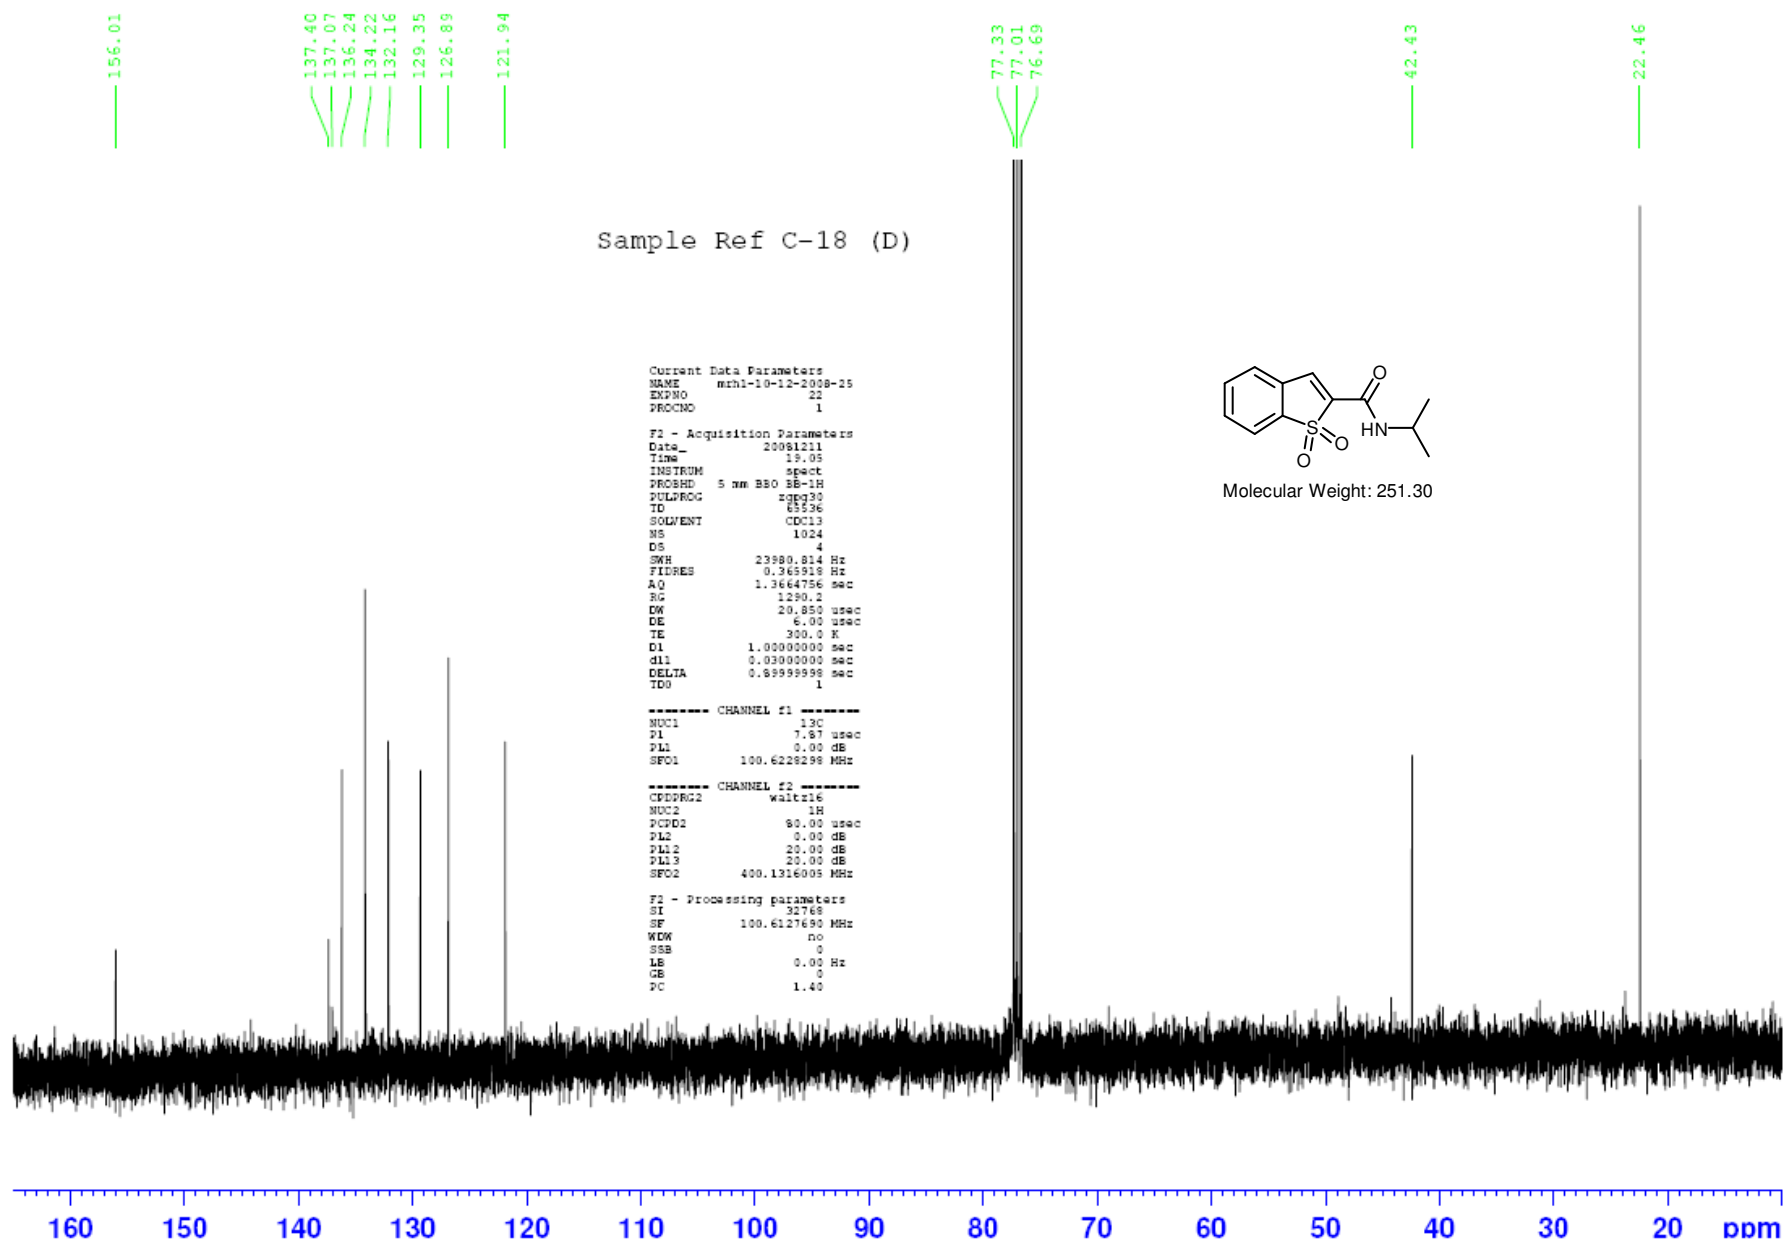

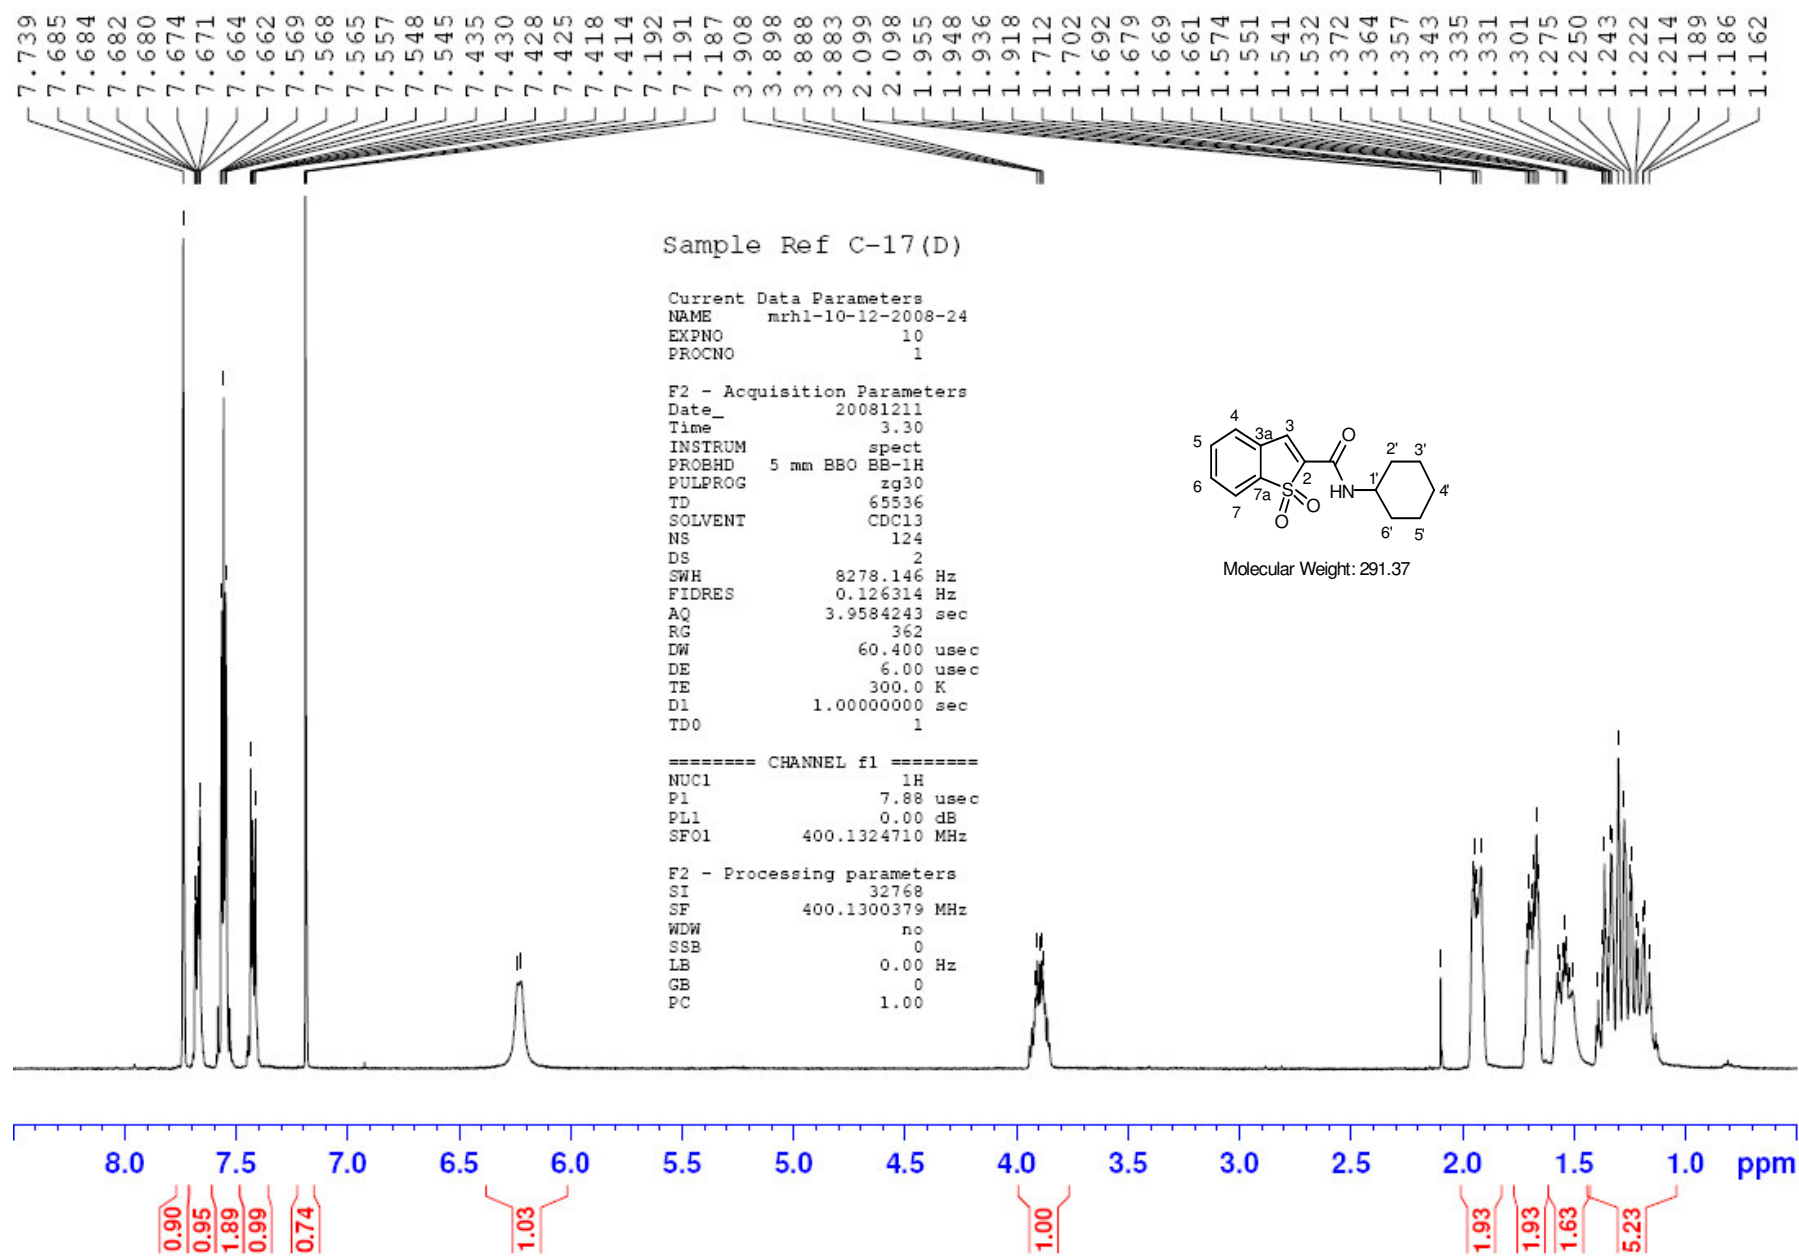

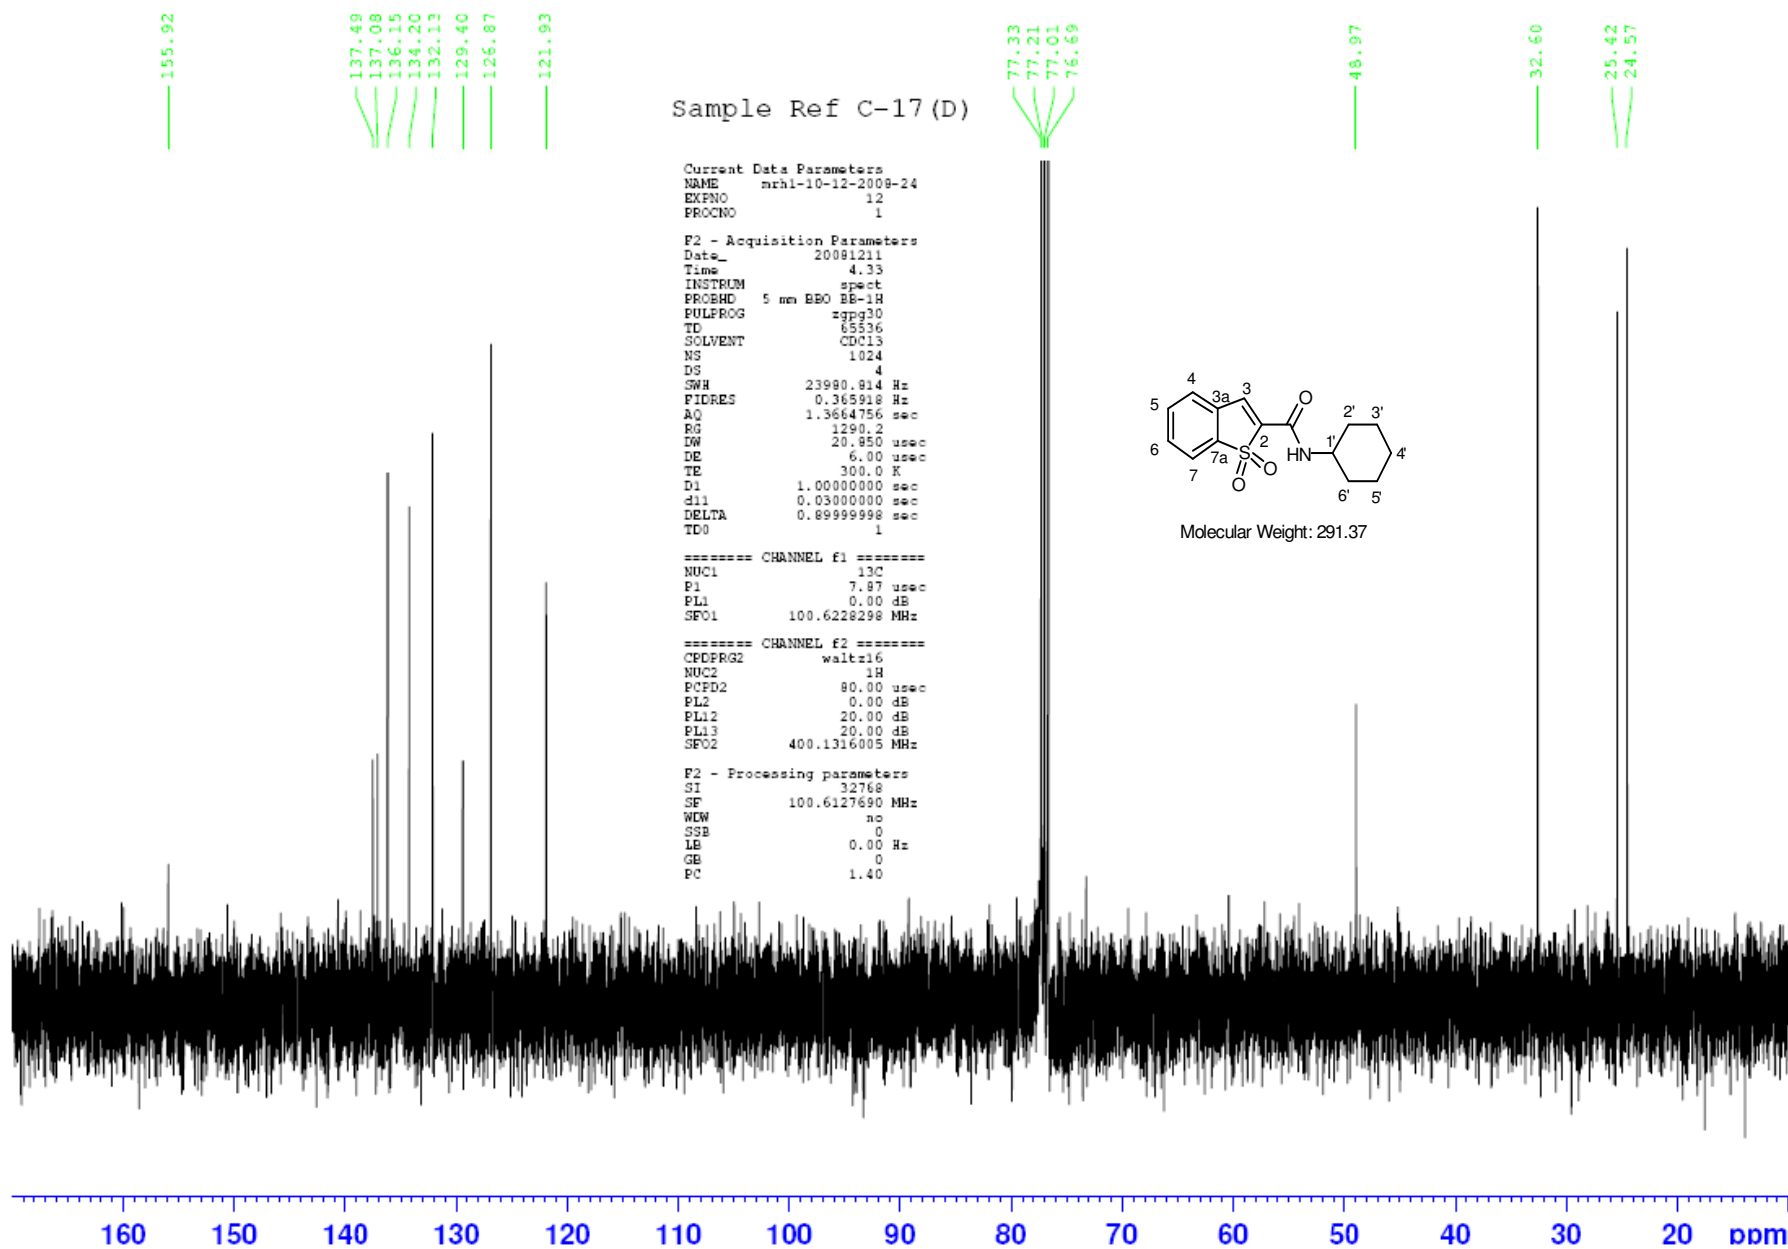

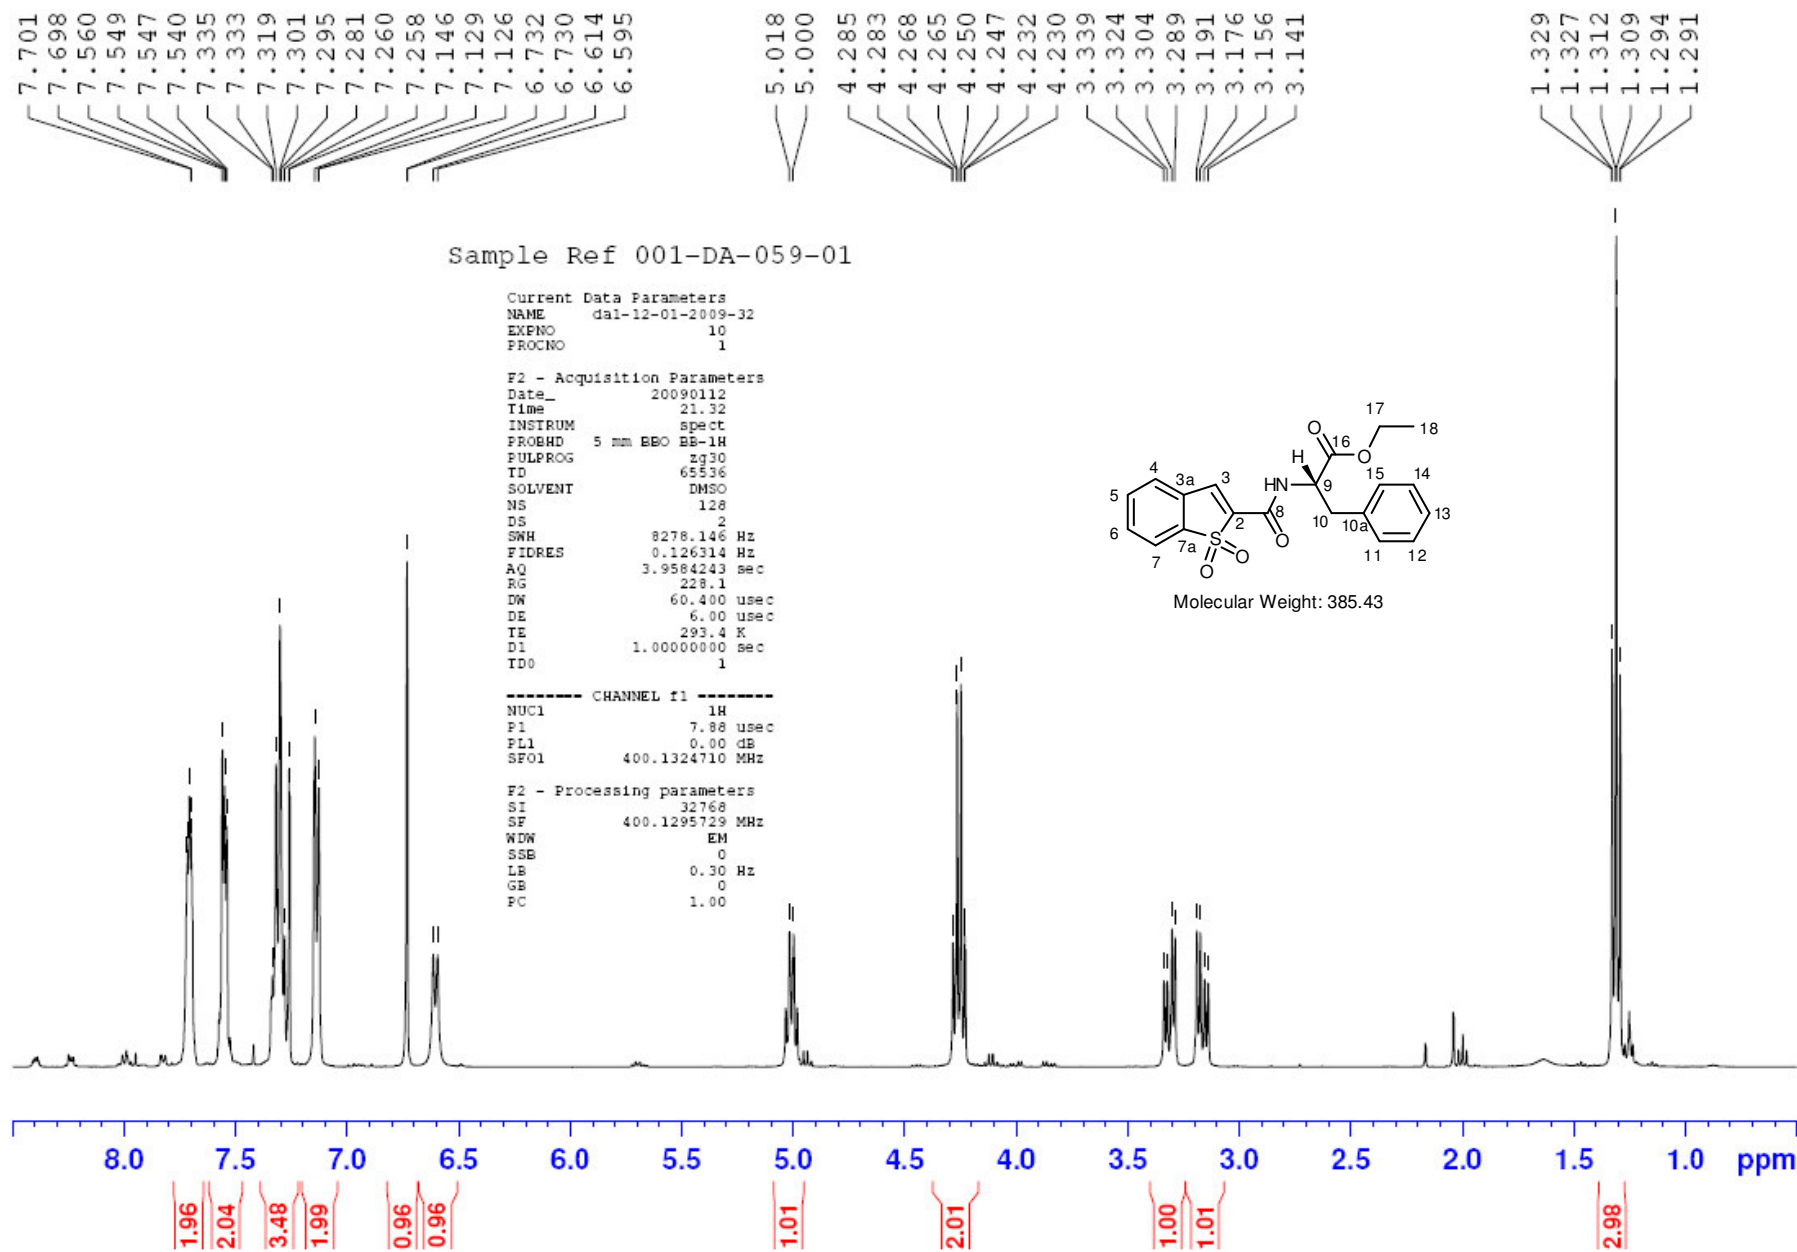

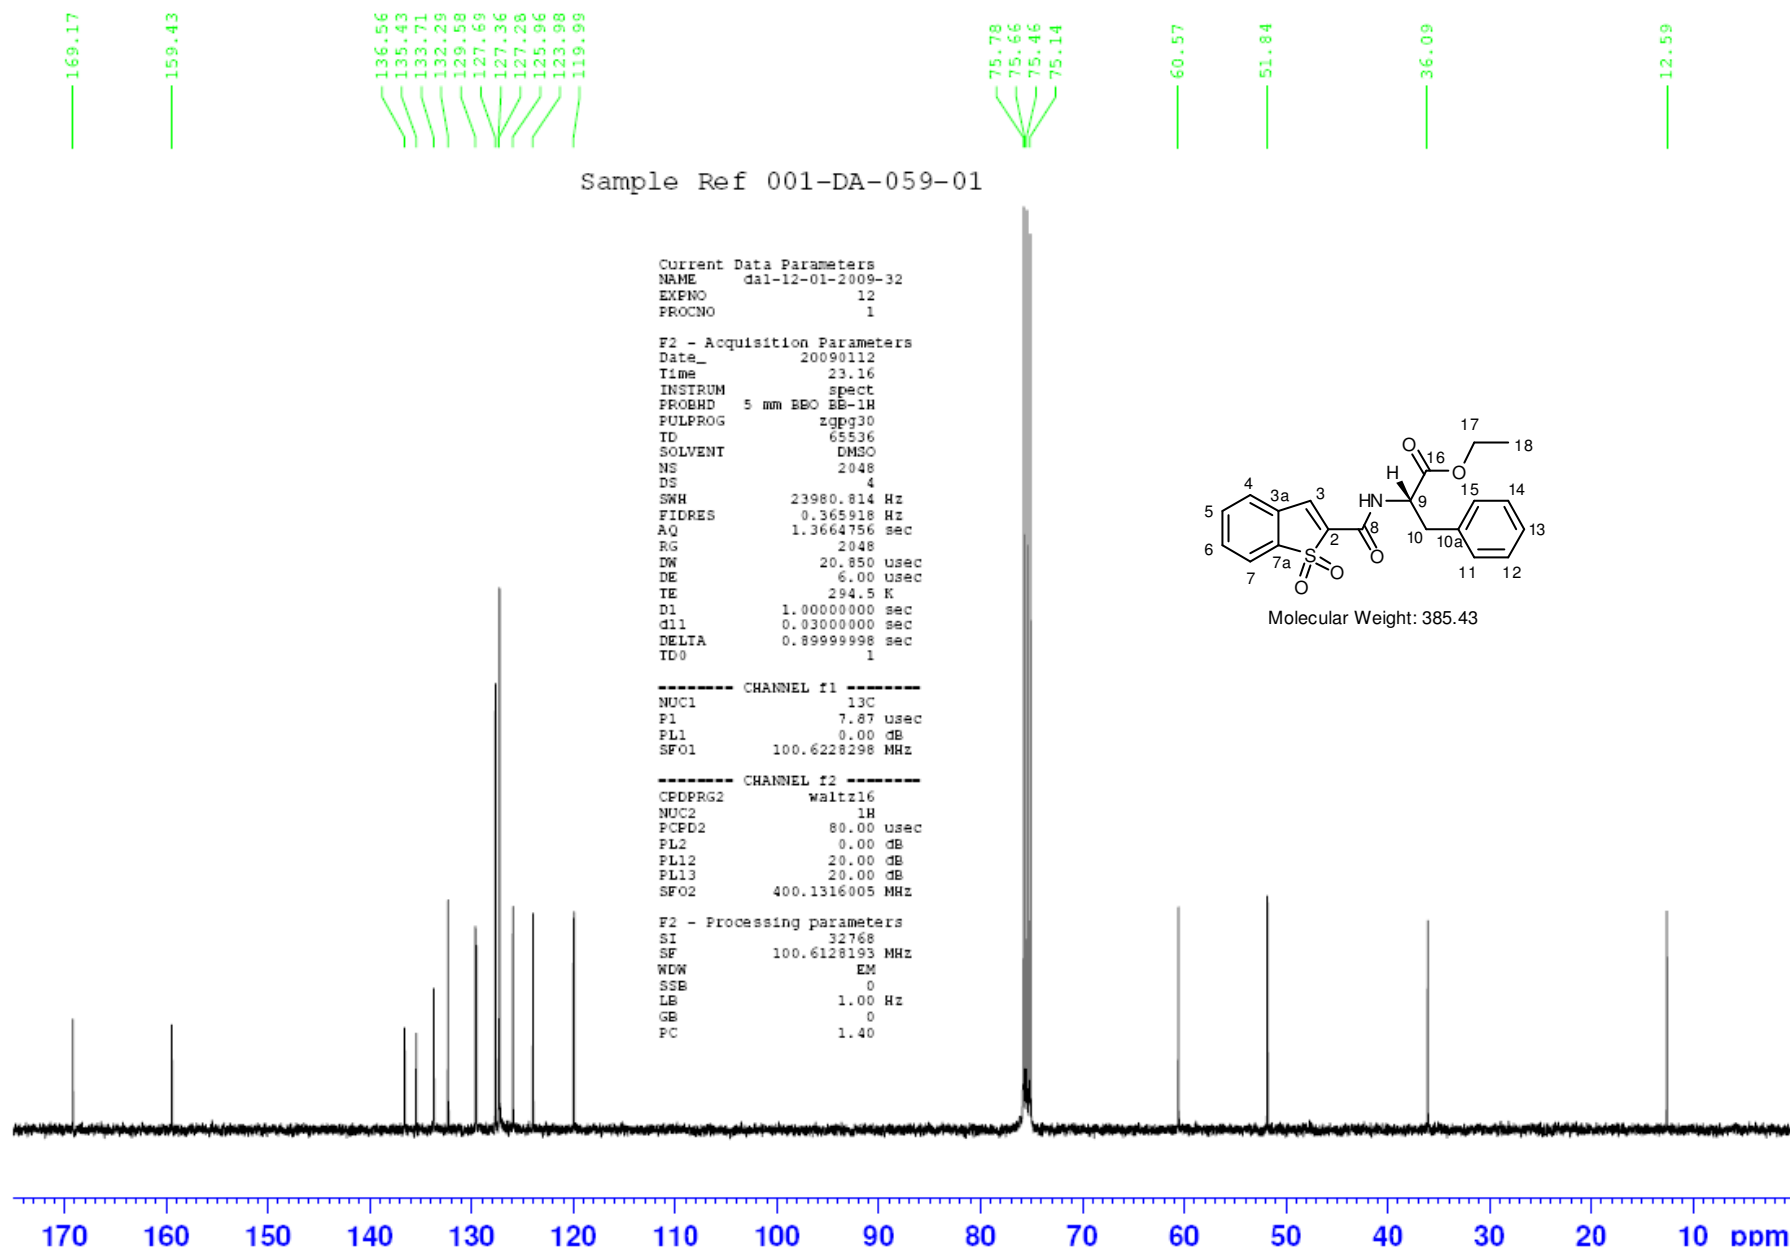

8.260

7.942  
7.9247.728  
7.710  
7.659

7.545

7.427  
7.407  
7.3887.245  
7.227  
7.207

6.996

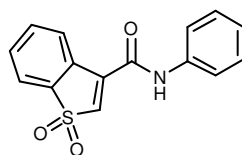

Molecular Weight: 285.32

Sample Ref 001-DA-046-01  
3-CONH + H (H<sub>2</sub>O<sub>2</sub>, 10 Equiv)

Current Data Parameters  
NAME dal-13-11-2008-17  
EXPNO 10  
PROCNO 1

F2 - Acquisition Parameters  
Date\_ 20081114  
Time 9.25  
INSTRUM spect  
PROBHD 5 mm BBO BB-1H  
PULPROG zg30  
TD 65536  
SOLVENT CDCl<sub>3</sub>  
NS 128  
DS 2  
SWH 8278.146 Hz  
FIDRES 0.126314 Hz  
AQ 3.9584243 sec  
RG 362  
DW 60.400 usec  
DE 6.00 usec  
TE 300.0 K  
D1 1.00000000 sec  
TDO 1

----- CHANNEL f1 -----  
NUC1 1H  
P1 7.88 usec  
PL1 0.00 dB  
SFO1 400.1324710 MHz

F2 - Processing parameters  
SI 32768  
SF 400.1300098 MHz  
WDW EM  
SSB 0  
LB 0.30 Hz  
GB 0  
PC 1.00

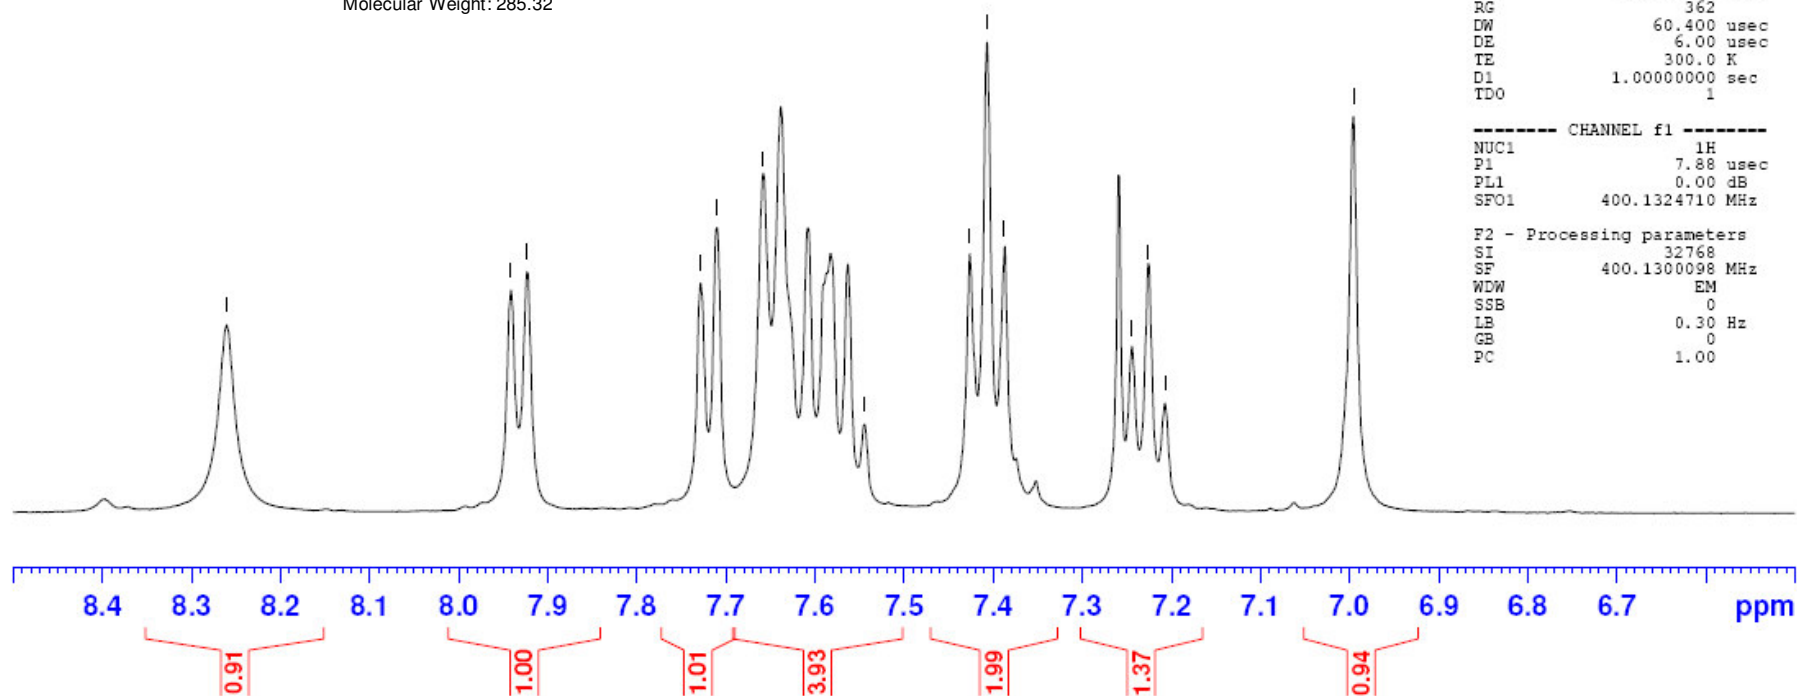

Sample Ref 001-DA-046-01  
3-CONH + H (H2O2, 10 Equiv)

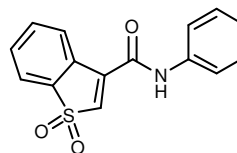

Molecular Weight: 285.32

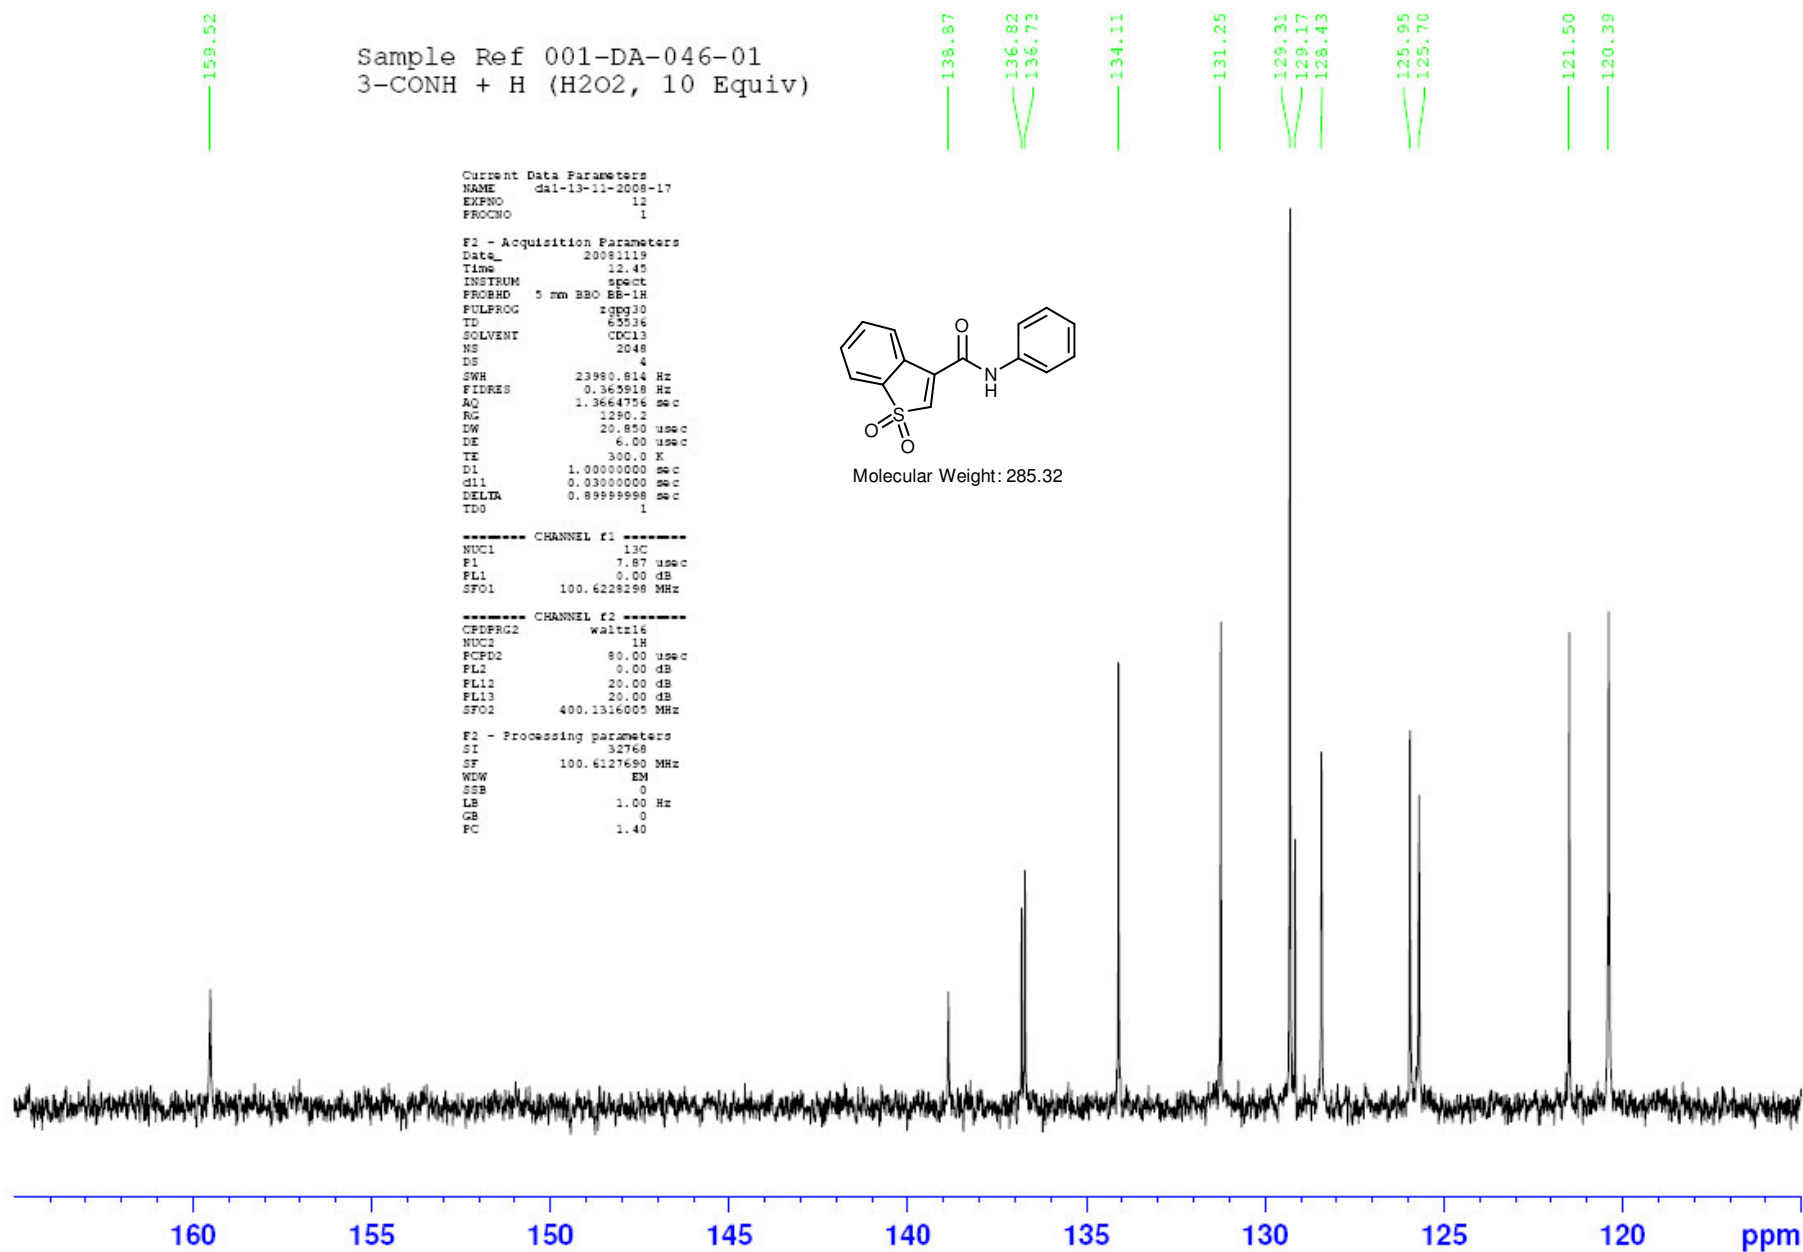

7.971  
7.954  
7.938  
7.744  
7.729  
7.633  
7.615  
7.598  
7.575  
7.553  
7.530

6.965  
6.945  
6.922

Sample Ref 001-DA-047-02  
3-CONH + OMe (H2O2, 10 Equiv)

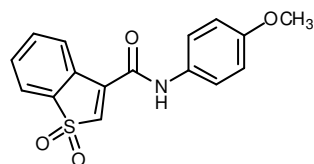

Molecular Weight: 315.34

Current Data Parameters  
NAME dal-14-11-2008-49  
EXPNO 10  
PROCNO 1

F2 - Acquisition Parameters  
Date\_ 20081114  
Time 11.34  
INSTRUM spect  
PROBHD 5 mm BBO BB-1H  
PULPROG zg30  
TD 65536  
SOLVENT CDCl3  
NS 128  
DS 2  
SWH 8278.146 Hz  
FIDRES 0.126314 Hz  
AQ 3.9584243 sec  
RG 406.4  
DN 60.400 usec  
DE 6.00 usec  
TE 300.0 K  
D1 1.00000000 sec  
TD0 1

----- CHANNEL f1 -----  
NUC1 1H  
P1 7.88 usec  
PL1 0.00 dB  
SFO1 400.1324710 MHz

F2 - Processing parameters  
SI 32768  
SF 400.1300106 MHz  
WDW EM  
SSB 0  
LB 0.30 Hz  
GB 0  
PC 1.00

3.831

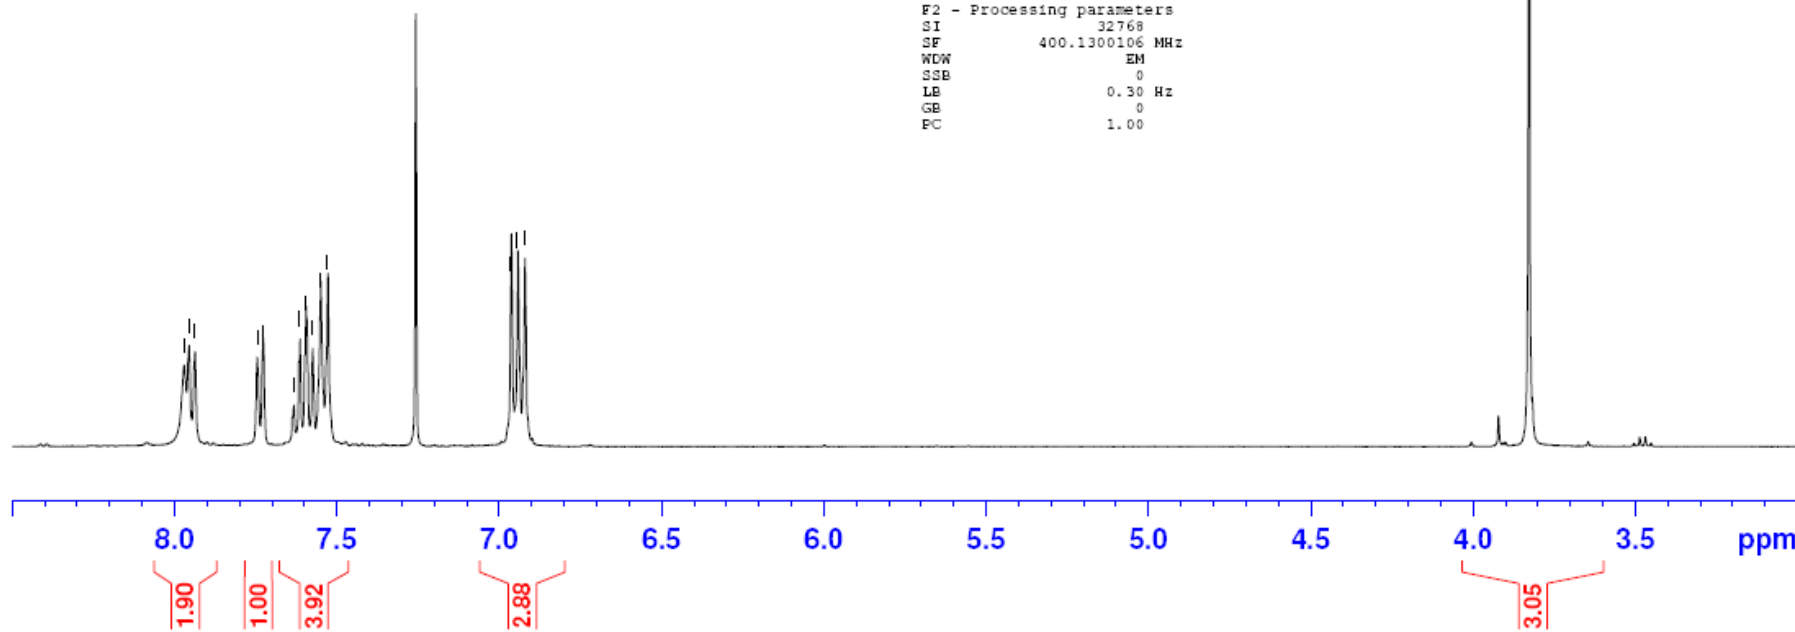



Sample Ref 001-DA-047-02  
3-CONH + OMe (H2O2, 10 Equiv)

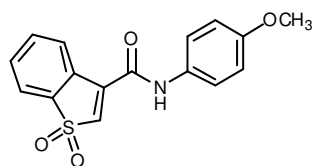

Molecular Weight: 315.34

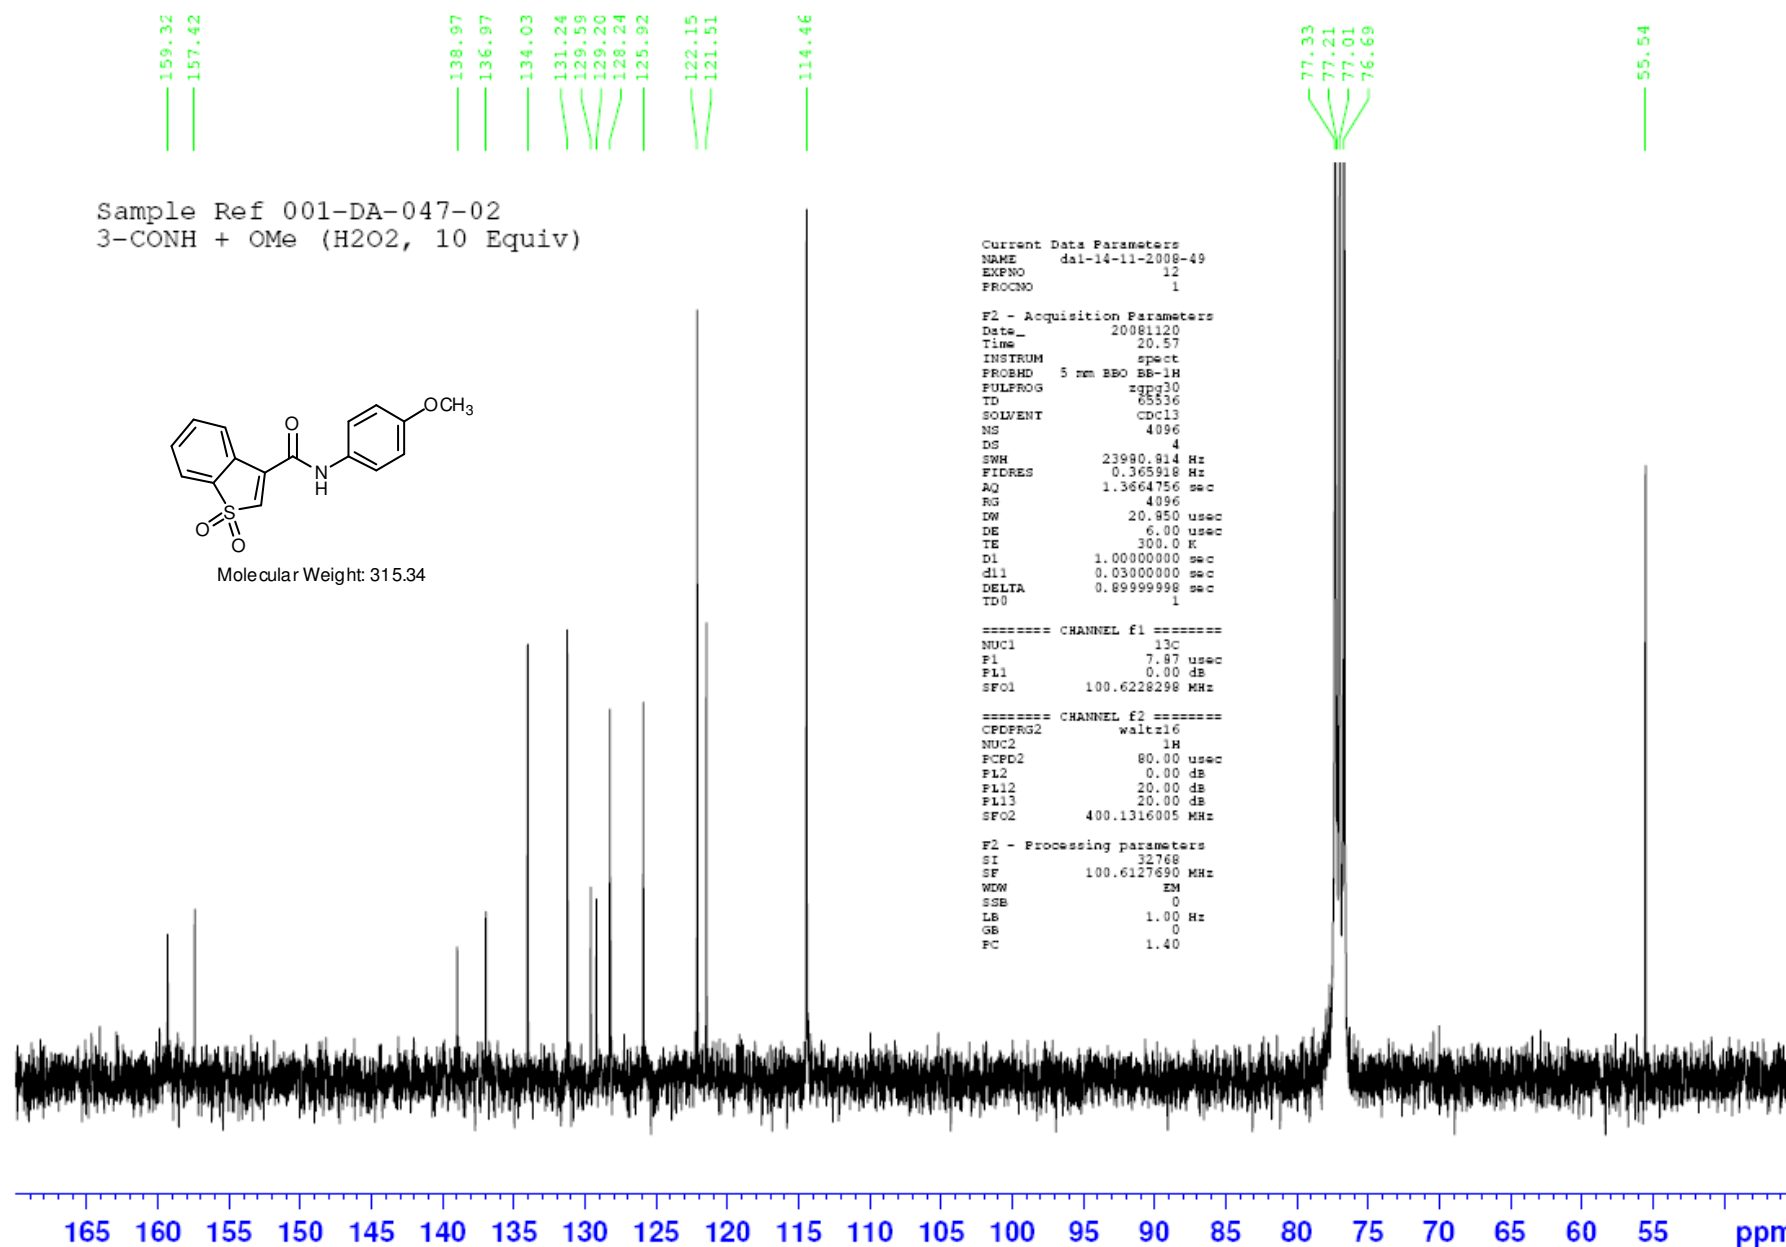

Sample Ref 001-DA-047-02  
3-CONH + OMe (H2O2, 10 Equiv)

```

Current Data Parameters
NAME      dal-14-11-2008-49
EXENO     15
PROCNO    1

F2 - Acquisition Parameters
Date_     20081120
Time      22.32
INSTRUM   spect
PROBHD    5 mm BBO BB-1H
PULPROG   invgplndgf
TD         1024
SOLVENT   CDCl3
NS         16
DS         16
SWH        3238.342 Hz
FIDRES     3.162443 Hz
AQ         0.1581556 sec
RG         16384
DW         154.400 usec
DE         6.00 usec
TE         300.0 K
d0         0.00000300 sec
d1         1.43815005 sec
d6         0.07100000 sec
d13        0.00000400 sec
d16        0.00010000 sec
IN0        0.00002240 sec

----- CHANNEL f1 -----
NUC1       1H
P1         7.98 usec
p2         15.76 usec
PL1        0.00 db
SFO1       400.1318948 MHz

----- CHANNEL f2 -----
NUC2       13C
P3         7.65 usec
PL2        0.00 db
SFO2       100.6227746 MHz

----- GRADIENT CHANNEL -----
GPM1       SINE.100
GPM2       SINE.100
GPM3       SINE.100
GPZ1       50.00 %
GPZ2       30.00 %
GPZ3       40.10 %
P16        1000.00 usec

F1 - Acquisition parameters
ND0        2
TD         128
SFO1       100.6228 MHz
FIDRES     174.386154 Hz
SW         221.833 ppm
F0MODE     QF

F2 - Processing parameters
SI         1024
SF         400.1300000 MHz
WDW        SINE
SSB        0
LB         0.00 Hz
GB         0
PC         1.40

F1 - Processing parameters
SI         1024
NUC2       13C
SF         100.6127690 MHz
WDW        SINE
SSB        0
LB         0.00 Hz
GB         0

```

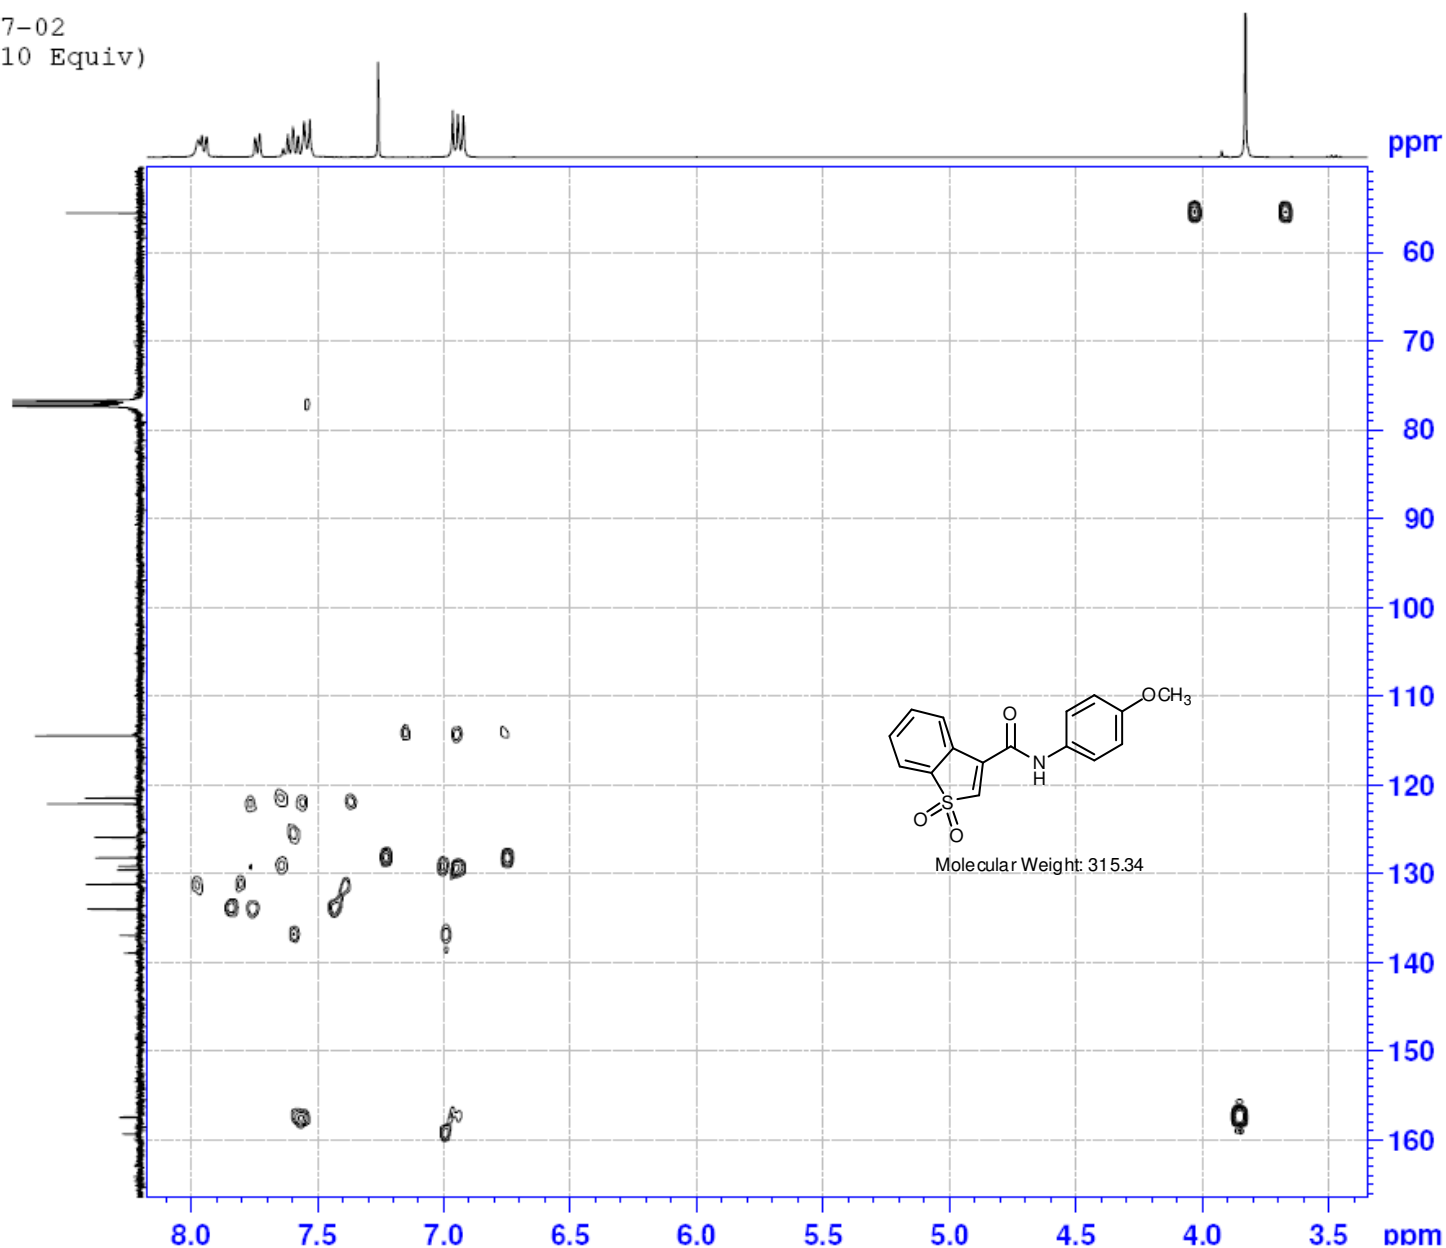

11.41

Sample Ref 001-DA-056-01  
3-COOH + NO<sub>2</sub> (H<sub>2</sub>O<sub>2</sub>)

Current Data Parameters  
NAME dal-08-01-2009-58  
EXPNO 10  
PROCNO 1

F2 - Acquisition Parameters  
Date\_ 20090108  
Time 16.01  
INSTRUM spect  
PROBHD 5 mm BBO BB-1H  
PULPROG zg30  
TD 65536  
SOLVENT DMSO  
NS 128  
DS 2  
SWH 8278.146 Hz  
FIDRES 0.126314 Hz  
AQ 3.9584243 sec  
RG 362  
DW 60.400 usec  
DE 6.00 usec  
TE 293.3 K  
D1 1.00000000 sec  
TD0 1

----- CHANNEL f1 -----  
NUC1 1H  
P1 7.88 usec  
PL1 0.00 dB  
SFO1 400.1324710 MHz

F2 - Processing parameters  
SI 32768  
SF 400.1300000 MHz  
WDW EM  
SSB 0  
LB 0.30 Hz  
GB 0  
PC 1.00

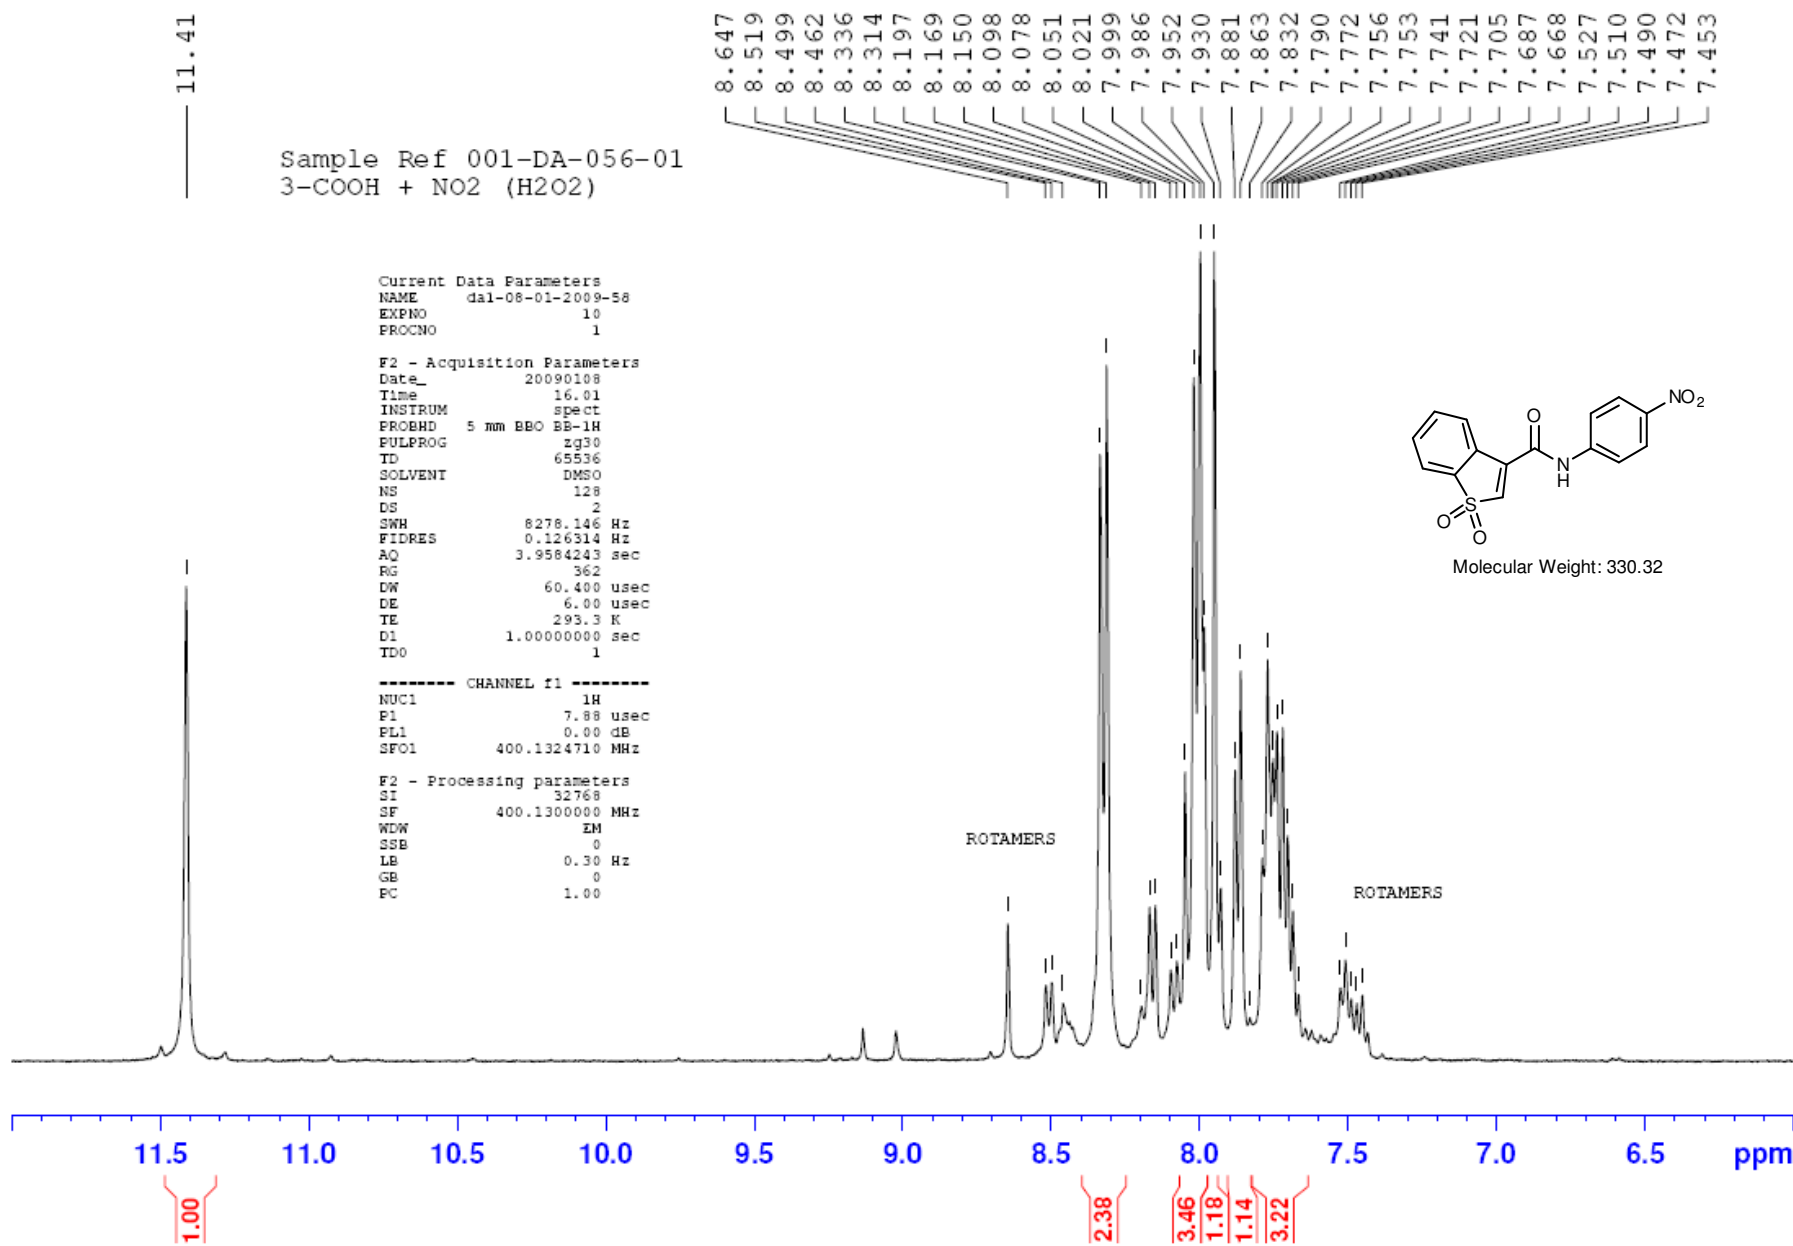

163.17  
160.75

Sample Ref 001-DA-056-01  
3-COOH + NO<sub>2</sub> (H<sub>2</sub>O<sub>2</sub>)

144.12  
143.14

137.90  
136.95  
136.53  
135.34  
134.57  
134.30  
134.21

131.45  
131.08  
130.88

128.75  
128.51

125.73  
125.27  
124.97  
124.11

123.01

121.66  
121.53

120.04

Current Data Parameters  
NAME dal-08-01-2008-58  
EXPNO 12  
PROCNO 1  
  
F2 - Acquisition Parameters  
Date\_ 20090109  
Time 1.54  
INSTRUM spect  
PROBHD 5 mm BBO BB-1H  
PULPROG zgpg30  
TD 65536  
SOLVENT DMSO  
NS 2048  
DS 4  
SWH 23980.814 Hz  
FIDRES 0.365918 Hz  
AQ 1.3664756 sec  
RG 1625.5  
DW 20.850 usec  
DE 6.00 usec  
TE 294.3 K  
D1 1.00000000 sec  
d11 0.03000000 sec  
DELTA 0.89999998 sec  
TD0 1

----- CHANNEL f1 -----  
NUC1 13C  
P1 7.87 usec  
PL1 0.00 dB  
SFO1 100.6228298 MHz

----- CHANNEL f2 -----  
CPDPRG2 waltz16  
NUC2 1H  
PCPD2 80.00 usec  
PL2 0.00 dB  
PL12 20.00 dB  
PL13 20.00 dB  
SFO2 400.1316005 MHz

F2 - Processing parameters  
SI 32768  
SF 100.6128193 MHz  
WDW EM  
SSB 0  
LB 1.00 Hz  
GB 0  
PC 1.40

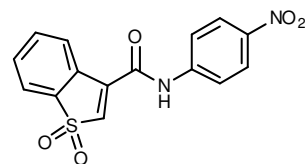

Molecular Weight: 330.32

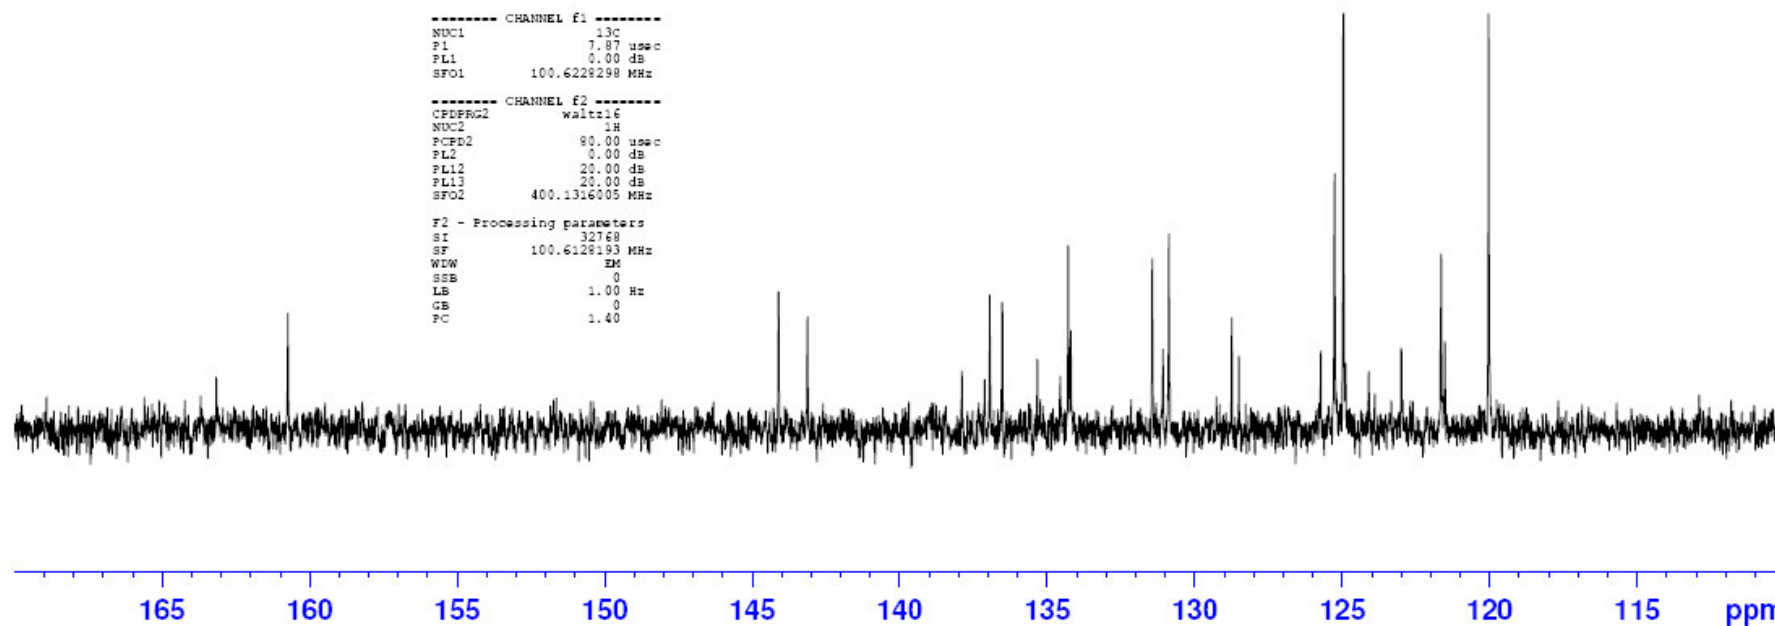

Sample Ref 001-DA-056-01  
3-COOH + NO2 (H2O2)

Current Data Parameters  
NAME dal-08-01-2009-58  
EXPNO 15  
PROCNO 1

F2 - Acquisition Parameters  
Date\_ 20090109  
Time 3.06  
INSTRUM spect  
PROBHD 5 mm BBO BB-1H  
PULPROG inv4gplrdgdf  
TD 1024  
SOLVENT DMSO  
NS 8  
DS 16  
SWH 5668.934 Hz  
FIDRES 5.536068 Hz  
AQ 0.0903668 sec  
RG 16384  
DW 88.200 usec  
DE 6.00 usec  
TE 293.7 K  
d0 0.00000000 sec  
d1 1.50573397 sec  
d6 0.07100000 sec  
d13 0.00000400 sec  
d16 0.00010000 sec  
IN0 0.00002240 sec

----- CHANNEL f1 -----  
NUC1 1H  
P1 7.69 usec  
P2 15.76 usec  
PL1 0.00 dB  
SFO1 400.1333063 MHz

----- CHANNEL f2 -----  
NUC2 13C  
P3 7.65 usec  
PL2 0.00 dB  
SFO2 100.6227746 MHz

----- GRADIENT CHANNEL -----  
GPNAM1 SINE.100  
GPNAM2 SINE.100  
GPNAM3 SINE.100  
GPE1 50.00 %  
GPE2 30.00 %  
GPE3 40.10 %  
P16 1000.00 usec

F1 - Acquisition parameters  
ND0 2  
TD 128  
SFO1 100.6228 MHz  
FIDRES 174.386154 Hz  
SW 221.933 ppm  
FAMODE GF

F2 - Processing parameters  
SI 1024  
SF 400.1300000 MHz  
WDW SINE  
SSB 0  
LB 0.00 Hz  
GB 0  
PC 1.40

F1 - Processing parameters  
SI 1024  
MC2 GF  
SF 100.6127690 MHz  
WDW SINE  
SSB 0  
LB 0.00 Hz  
GB 0

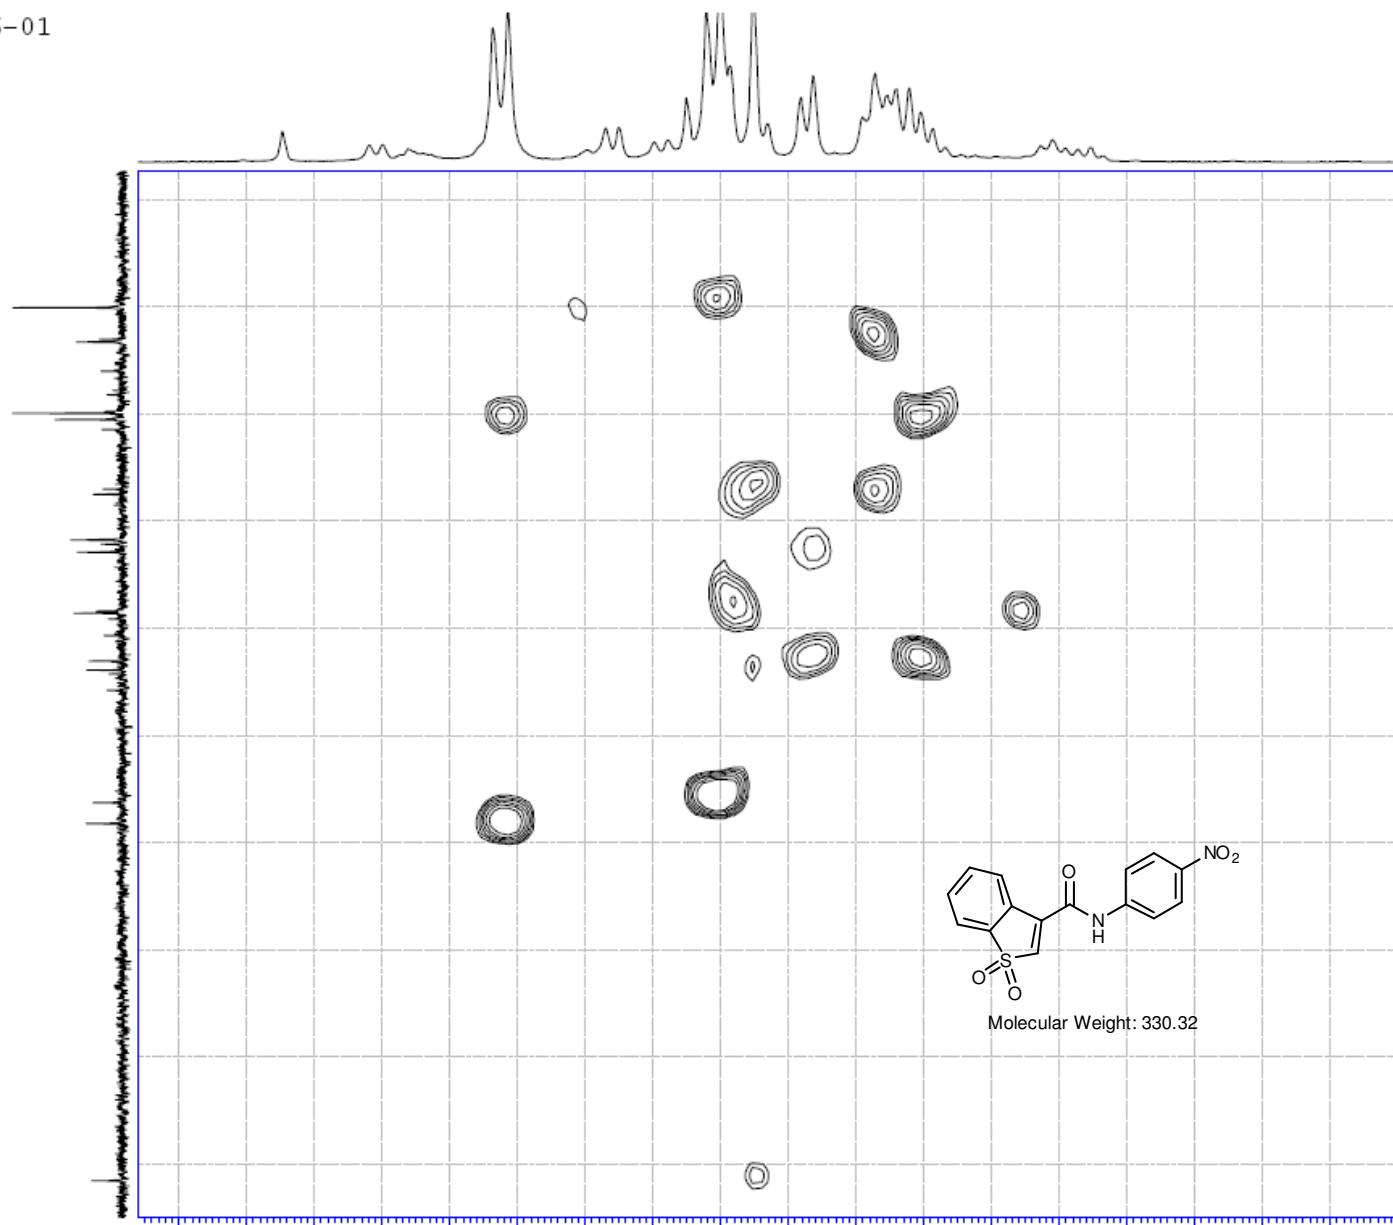

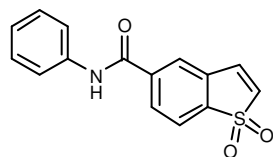

Molecular Weight: 285.32

Sample Ref 001-DA-043-01

Current Data Parameters  
NAME dal-04-11-2008-47  
EXPNO 10  
PROCNO 1

F2 - Acquisition Parameters  
Date\_ 20081104  
Time 17.31  
INSTRUM spect  
PROBHD 5 mm BBO BB-1H  
PULPROG zg30  
TD 65536  
SOLVENT DMSO  
NS 64  
DS 2  
SWH 8278.146 Hz  
FIDRES 0.126314 Hz  
AQ 3.9584243 sec  
RG 256  
DW 60.400 usec  
DE 6.00 usec  
TE 300.0 K  
D1 1.00000000 sec  
TD0 1

----- CHANNEL f1 -----  
NUC1 1H  
P1 7.88 usec  
PL1 0.00 dB  
SFO1 400.1324710 MHz

F2 - Processing parameters  
SI 32768  
SF 400.1300000 MHz  
WDW EM  
SSB 0  
LB 0.30 Hz  
GB 0  
PC 1.00

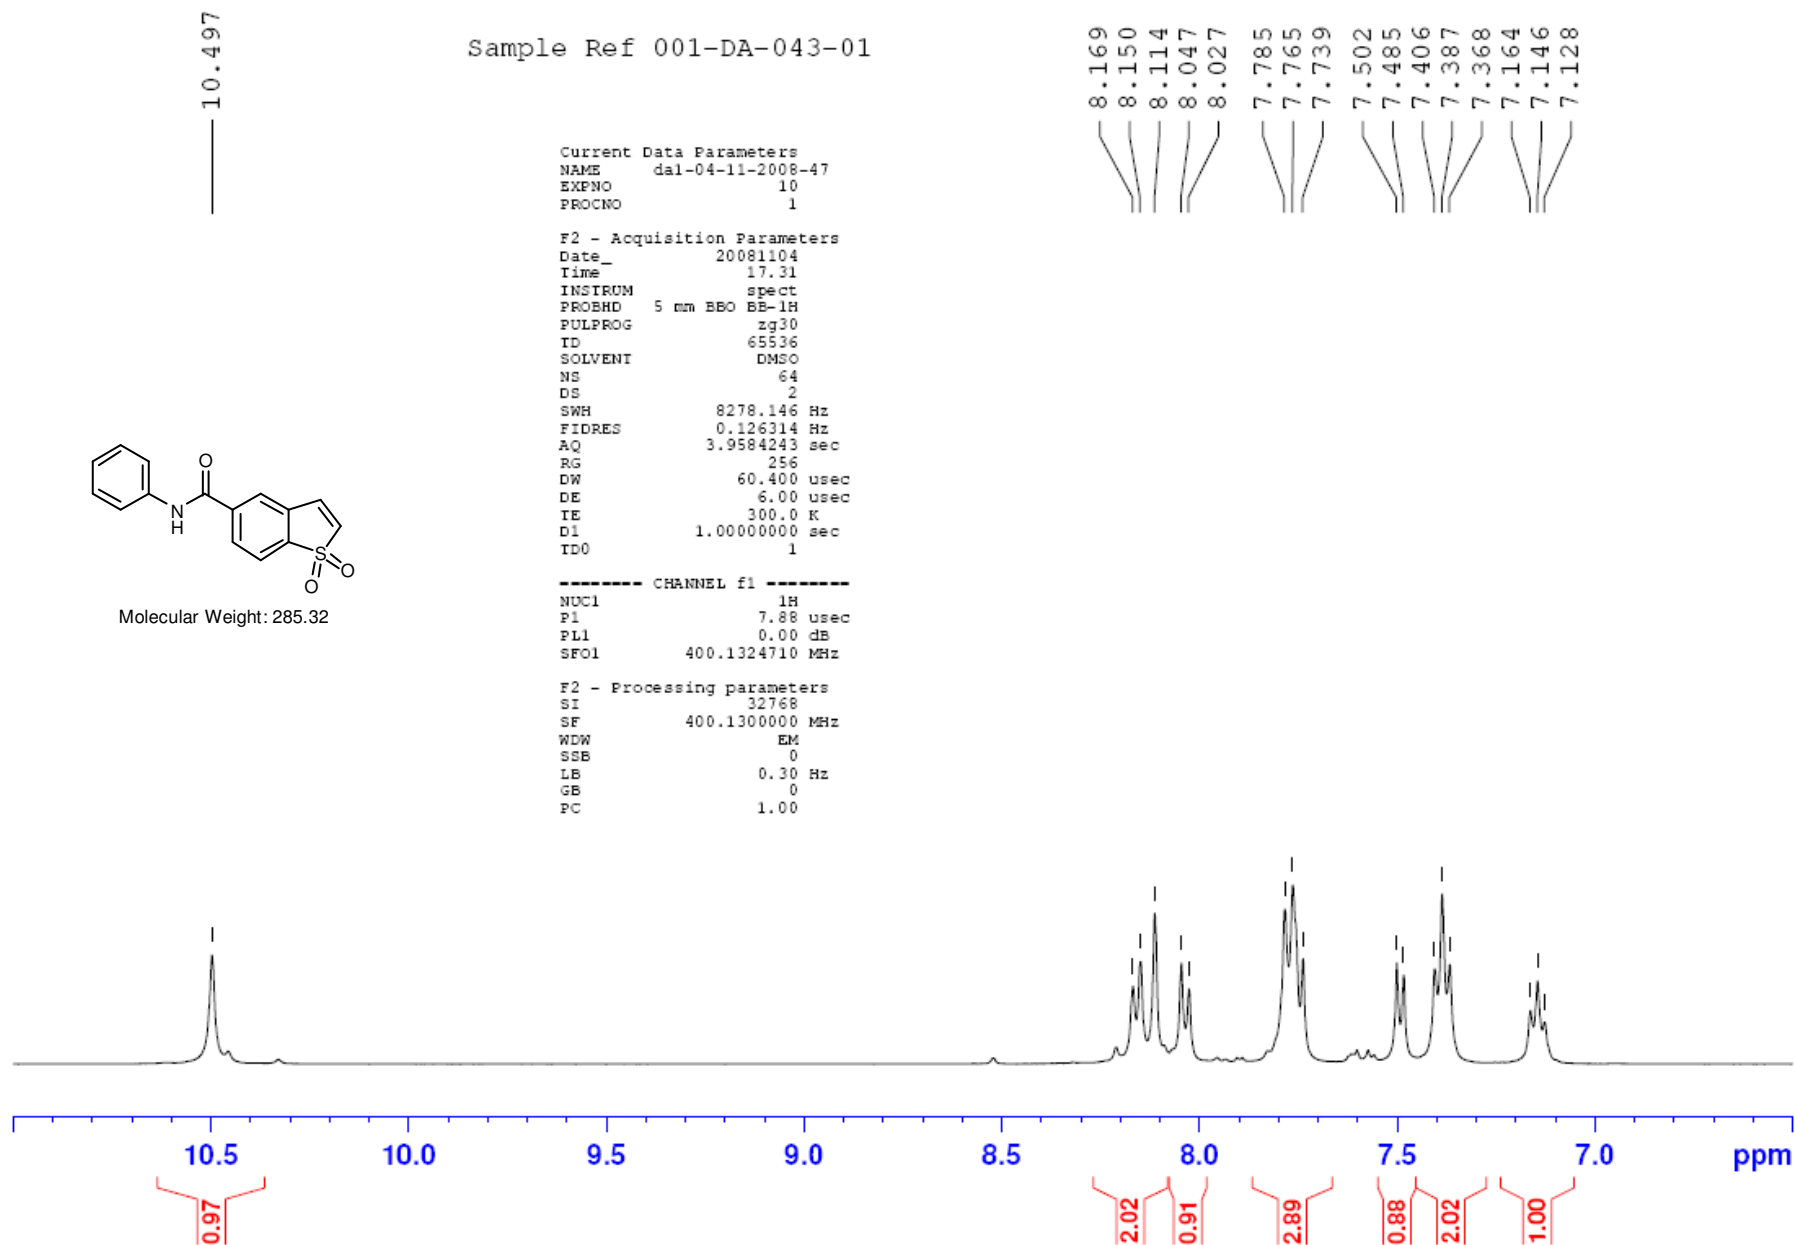

Sample Ref 001-DA-043-01

Current Data Parameters  
NAME dal-04-11-2008-47  
EXPNO 12  
PROCNO 1

F2 - Acquisition Parameters  
Date\_ 20081105  
Time 19.39  
INSTRUM spect  
PROBHD 5 mm BBO BB-1H  
PULPROG zgpg30  
TD 65536  
SOLVENT DMSO  
NS 2048  
DS 4  
SWH 23980.814 Hz  
FIDRES 0.365918 Hz  
AQ 1.3664756 sec  
RG 1290.2  
DW 20.950 usec  
DE 6.00 usec  
TE 300.0 K  
D1 1.00000000 sec  
d11 0.03000000 sec  
DELTA 0.89999999 sec  
TD0 1

----- CHANNEL f1 -----  
NUC1 13C  
P1 7.87 usec  
PL1 0.00 dB  
SFO1 100.6228298 MHz

----- CHANNEL f2 -----  
CPDPRG2 waltz16  
NUC2 1H  
PCPD2 80.00 usec  
PL2 0.00 dB  
PL12 20.00 dB  
PL13 20.00 dB  
SFO2 400.1316005 MHz

F2 - Processing parameters  
SI 32768  
SF 100.6128193 MHz  
WDW EM  
SSB 0  
LB 1.00 Hz  
GB 0  
PC 1.40

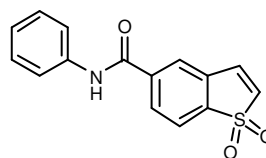

Molecular Weight: 285.32

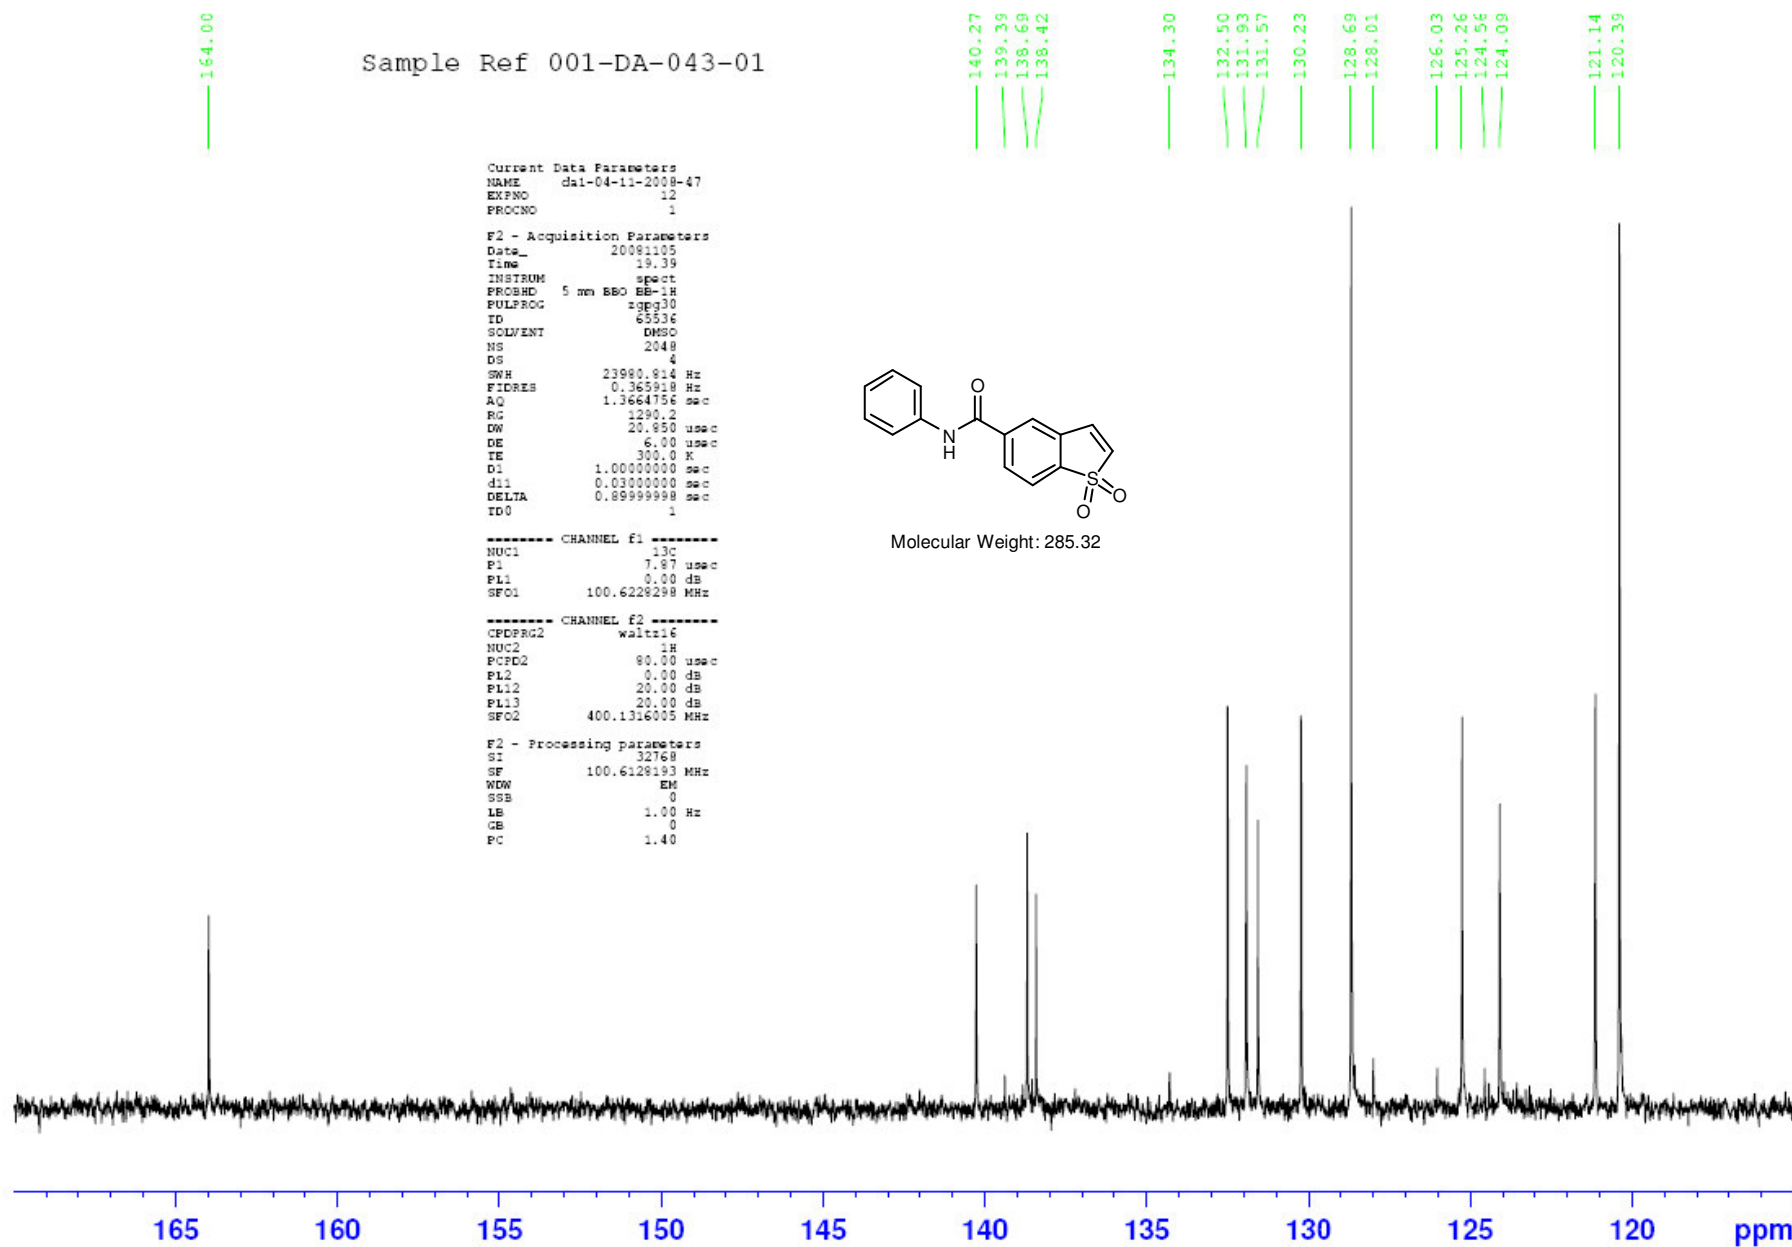

Sample Ref 001-DA-043-01

Current Data Parameters  
NAME dal-04-11-2008-47  
EXPNO 16  
PROCNO 1

F2 - Acquisition Parameters  
Date\_ 20081105  
Time 21.24  
INSTRUM spect  
PROBHD 5 mm BBO BB-1H  
PULPROG noesyph  
TD 2048  
SOLVENT DMSO  
NS 4  
DS 4  
SWH 3834.356 Hz  
FIDRES 1.872244 Hz  
AQ 0.2671092 sec  
RG 161.3  
DW 130.400 usec  
DE 6.00 usec  
TE 300.0 K  
d0 0.00012037 sec  
d1 1.24986996 sec  
d8 0.00000001 sec  
IN0 0.00026080 sec  
STICHT 129

===== CHANNEL f1 =====  
NUC1 1H  
P1 7.88 usec  
PL1 0.00 dB  
SFOL 400.1326100 MHz

F1 - Acquisition parameters  
ND0 1  
TD 256  
SFOL 400.1326 MHz  
FIDRES 14.977952 Hz  
SW 9.583 ppm  
FMODE States-TPPI

F2 - Processing parameters  
SI 1024  
SF 400.1300000 MHz  
WDW QSINE  
SSB 2  
LB 0.00 Hz  
GB 0  
PC 1.00

F1 - Processing parameters  
SI 1024  
MC2 States-TPPI  
SF 400.1300000 MHz  
WDW QSINE  
SSB 2  
LB 0.00 Hz  
GB 0

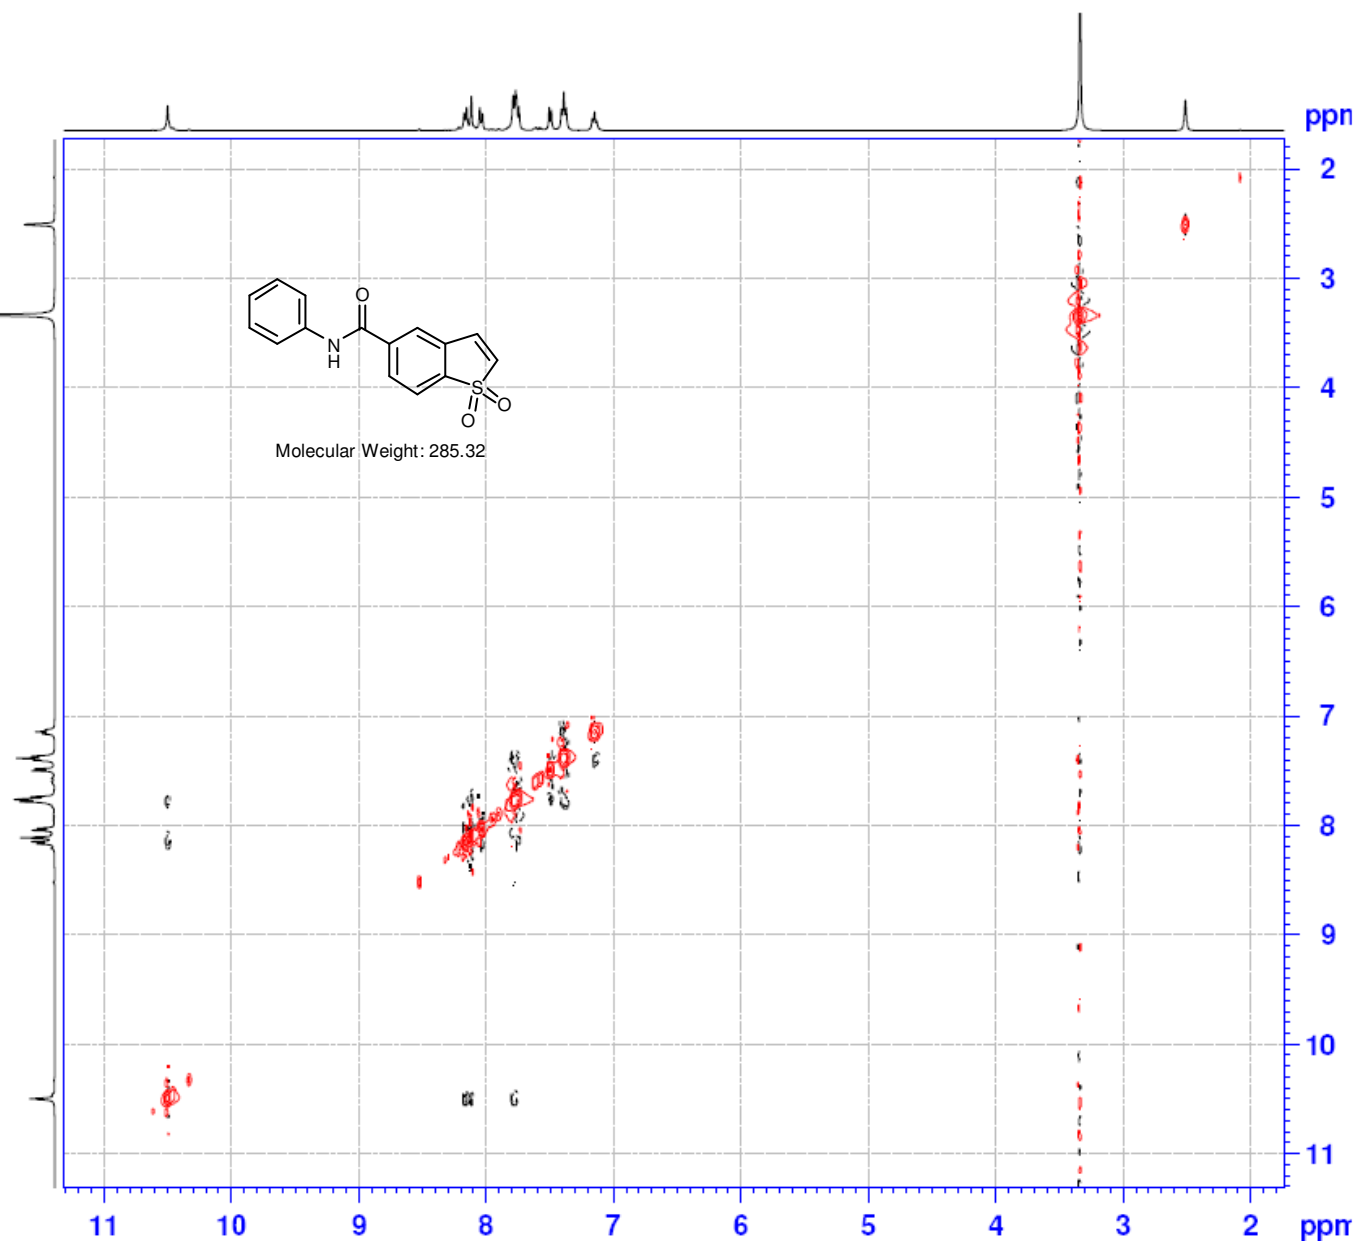



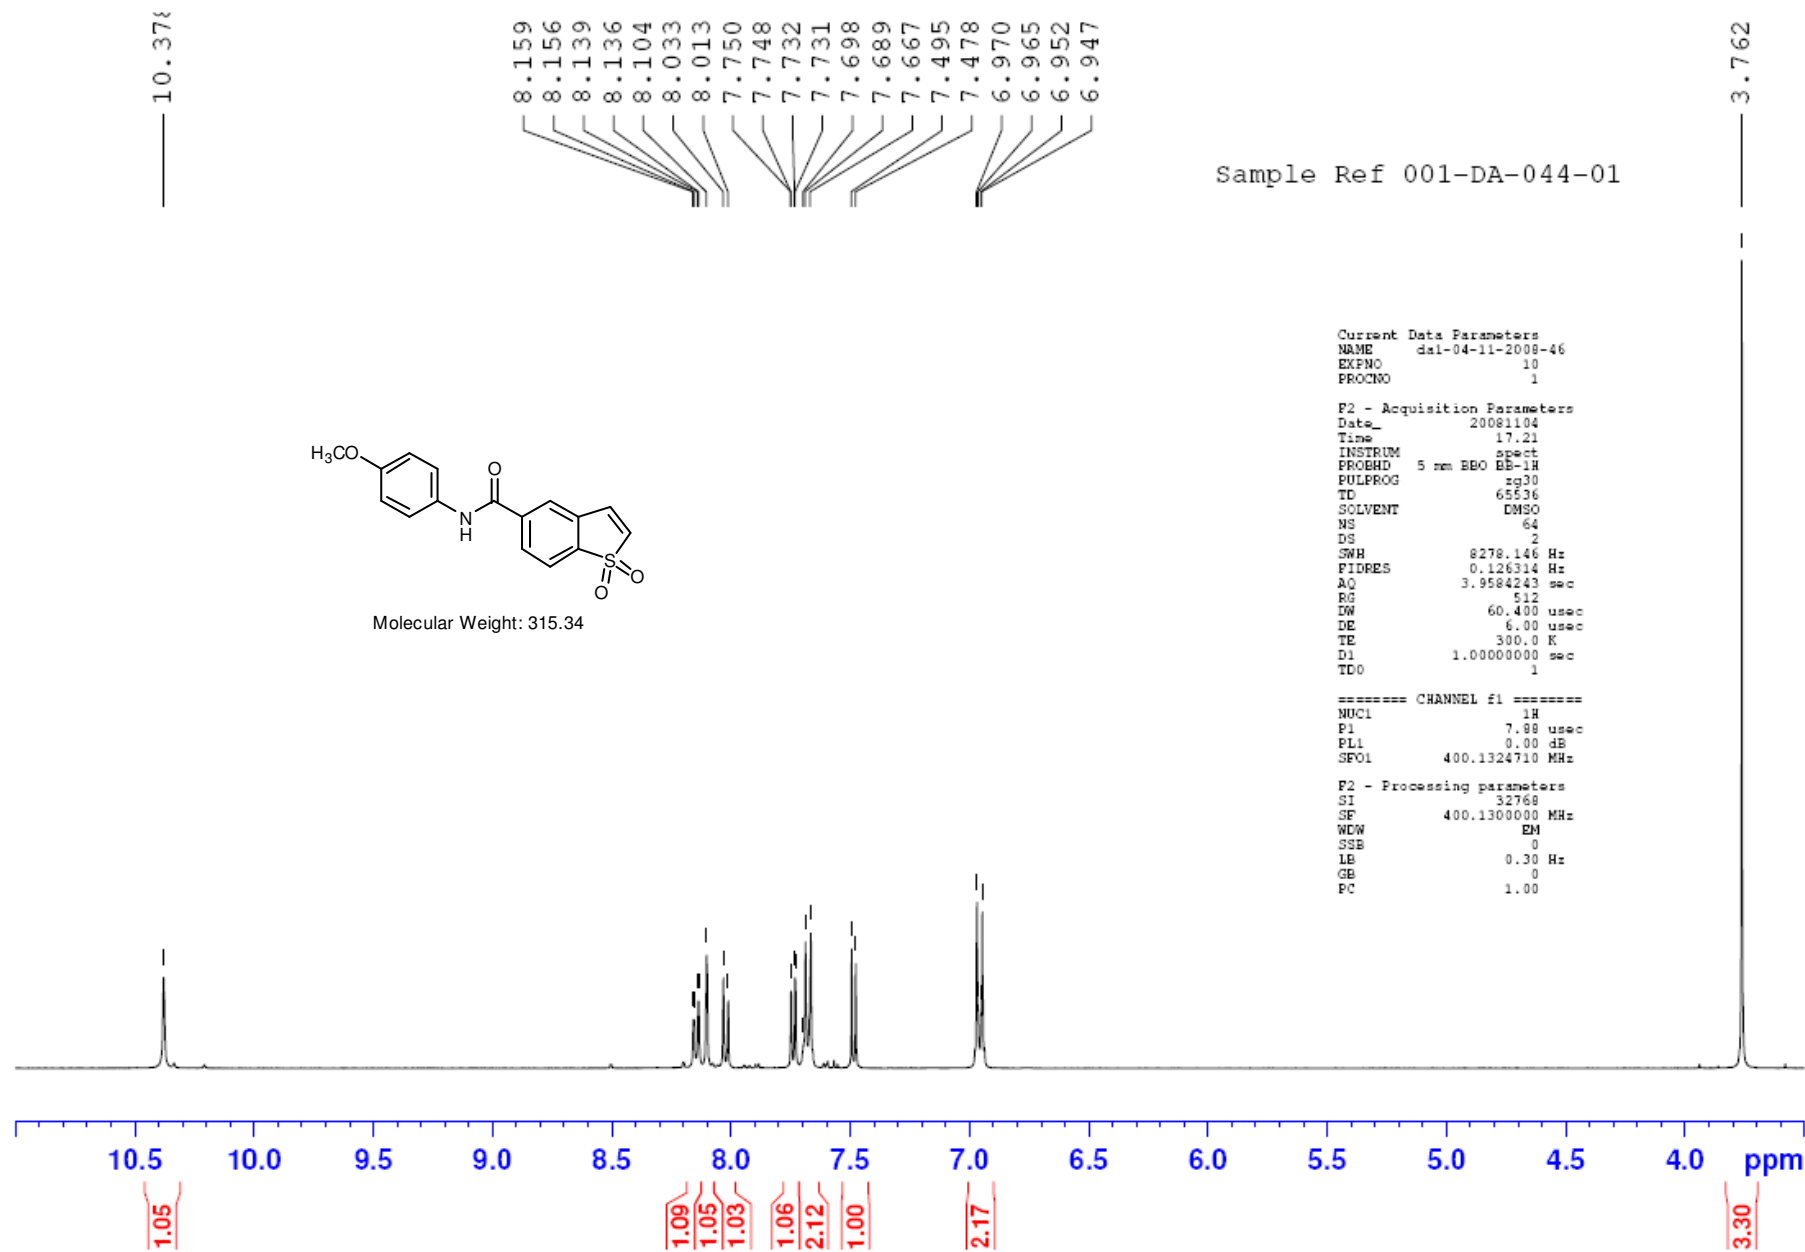

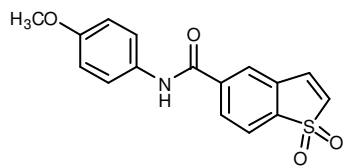

Molecular Weight: 315.34

Sample Ref 001-DA-044-01

```
Current Data Parameters
NAME      dal-04-11-2008-46
EXPNO     12
PROCNO    1

F2 - Acquisition Parameters
Date_     20081104
Time      18.59
INSTRUM   spect
PROBHD    5 mm BBO BB-1H
PULPROG   zgpg30
TD        65536
SOLVENT   DMSO
NS         1024
DS         4
SWH        23980.814 Hz
FIDRES     0.365918 Hz
AQ         1.3664756 sec
RG         3649.1
DW         20.850 usec
DE         6.00 usec
TE         300.0 K
D1         1.00000000 sec
d11        0.03000000 sec
DELTA     0.89999998 sec
TD0        1

----- CHANNEL f1 -----
NUC1       13C
P1         7.87 usec
PL1        0.00 dB
SFO1       100.6228298 MHz

----- CHANNEL f2 -----
CPDPRG2   waltz16
NUC2       1H
PCPD2      90.00 usec
PL2        0.00 dB
PL12       20.00 dB
PL13       20.00 dB
SFO2       400.1316005 MHz

F2 - Processing parameters
SI         32768
SF         100.6128193 MHz
WDW        EM
SSB        0
LB         1.00 Hz
GB         0
PC         1.40
```

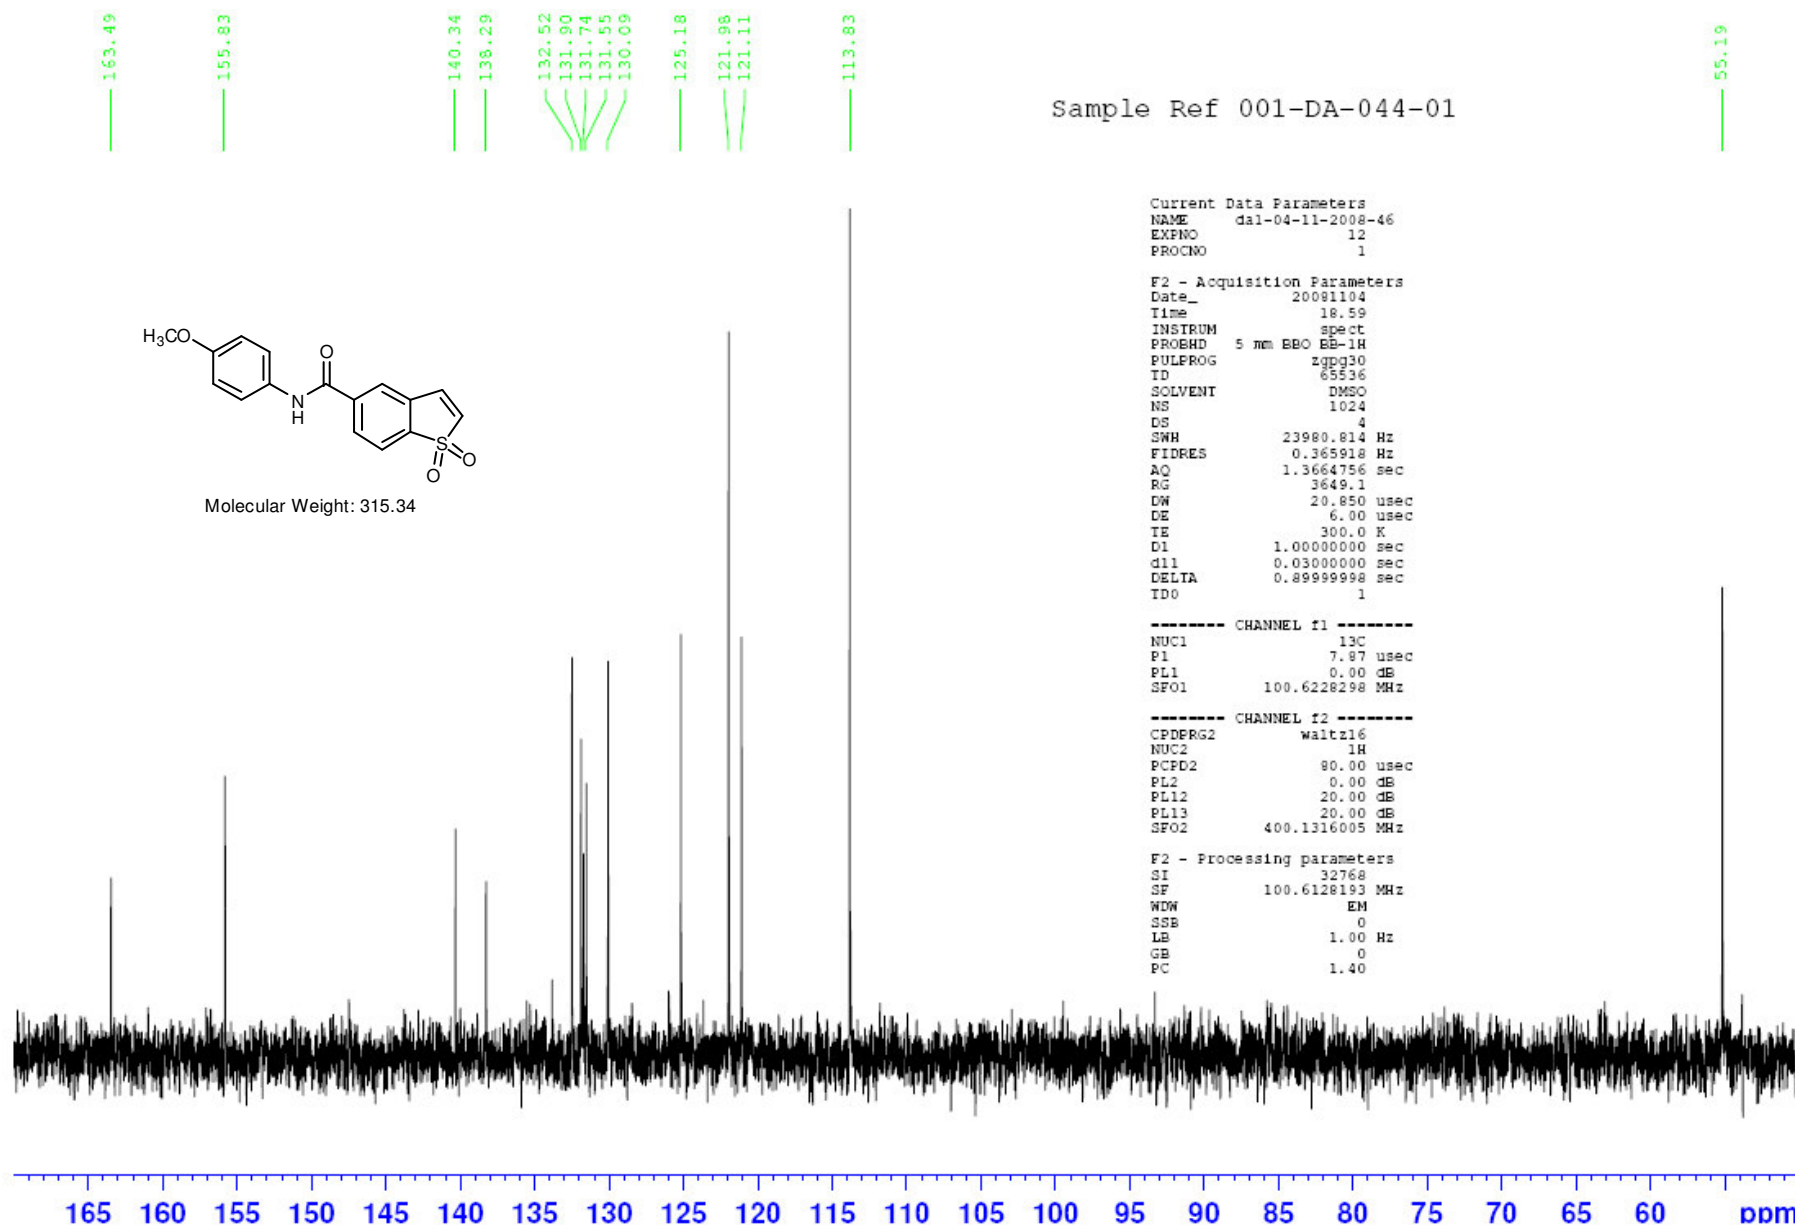

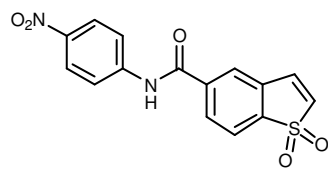

Molecular Weight: 330.32

Sample Ref 001-DA-058-01  
5-COOH + NO<sub>2</sub> (dioxirane)

Current Data Parameters  
NAME dal-12-01-2009-31  
EXPNO 10  
PROCNO 1

F2 - Acquisition Parameters  
Date\_ 20090112  
Time 17.07  
INSTRUM spect  
PROBHD 5 mm BBO BB-1H  
PULPROG zg30  
TD 65536  
SOLVENT DMSO  
NS 128  
DS 2  
SWH 8278.146 Hz  
FIDRES 0.126314 Hz  
AQ 3.9584243 sec  
RG 256  
DW 60.400 usec  
DE 6.00 usec  
TE 293.4 K  
D1 1.00000000 sec  
TD0 1

===== CHANNEL f1 =====  
NUC1 1H  
P1 7.88 usec  
PL1 0.00 dB  
SFO1 400.1324710 MHz

F2 - Processing parameters  
SI 32768  
SF 400.130034 MHz  
WDW EM  
SSB 0  
LB 0.30 Hz  
GB 0  
PC 1.00

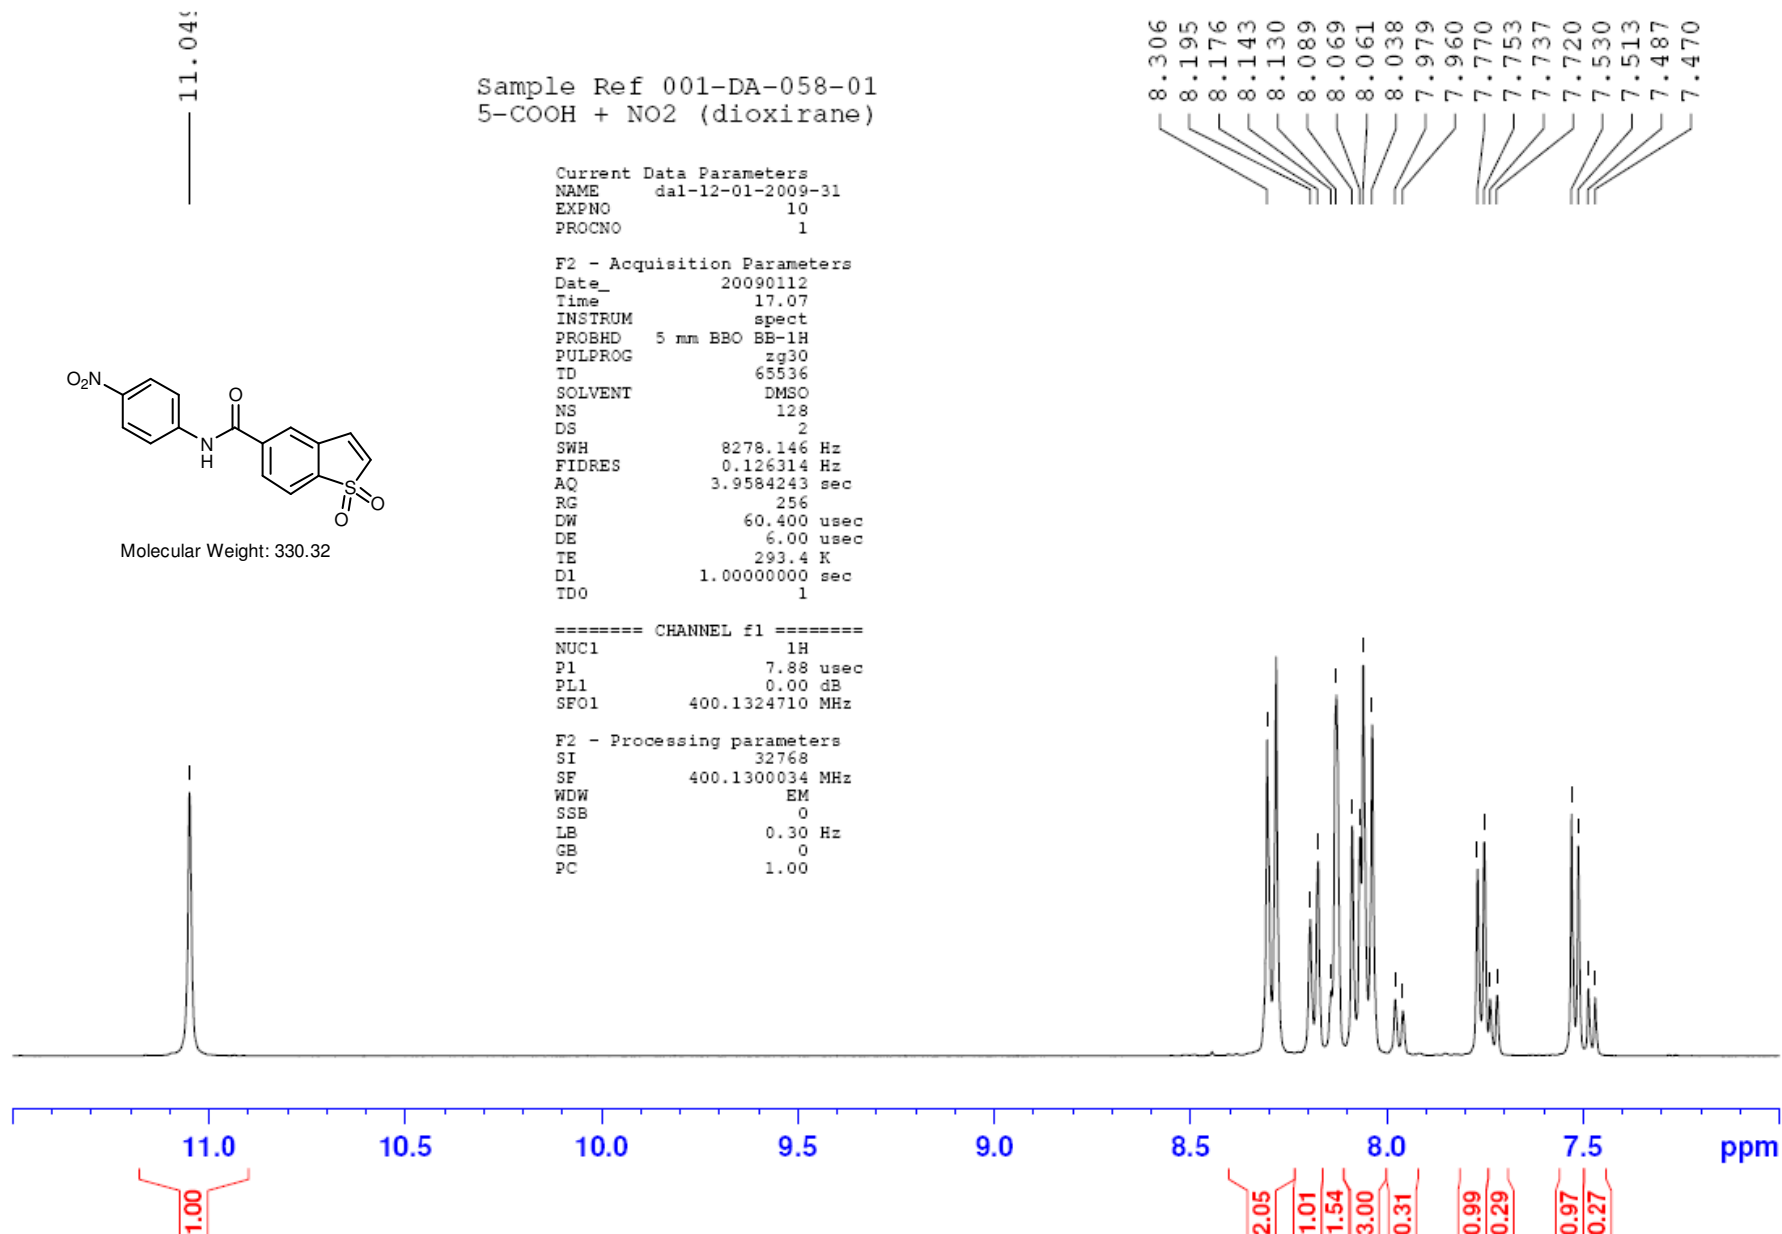

Sample Ref 001-DA-058-01  
5-COOH + NO2 (dioxirane)

Current Data Parameters  
NAME dal-12-01-2009-31  
EXPNO 12  
PROCNO 1

F2 - Acquisition Parameters  
Date\_ 20090112  
Time 18.49  
INSTRUM spect  
PROBHD 5 mm BBO BB-1H  
PULPROG zgpg30  
TD 65536  
SOLVENT DMSO  
NS 2048  
DS 4  
SWH 23980.814 Hz  
FIDRES 0.365918 Hz  
AQ 1.3664756 sec  
RG 1290.2  
DW 20.850 usec  
DE 6.00 usec  
TE 294.6 K  
D1 1.00000000 sec  
d11 0.03000000 sec  
DELTA 0.89999998 sec  
TD0 1

----- CHANNEL f1 -----  
NUC1 13C  
P1 7.87 usec  
PL1 0.00 dB  
SFO1 100.6228298 MHz

----- CHANNEL f2 -----  
CPDPRG2 waltz16  
NUC2 1H  
PCPD2 80.00 usec  
PL2 0.00 dB  
PL12 20.00 dB  
PL13 20.00 dB  
SFO2 400.1316005 MHz

F2 - Processing parameters  
SI 32768  
SF 100.6128193 MHz  
WDW EM  
SSB 0  
LB 1.00 Hz  
GB 0  
PC 1.40

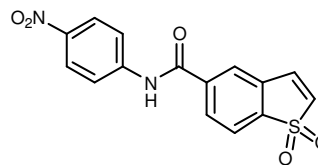

Molecular Weight: 330.32

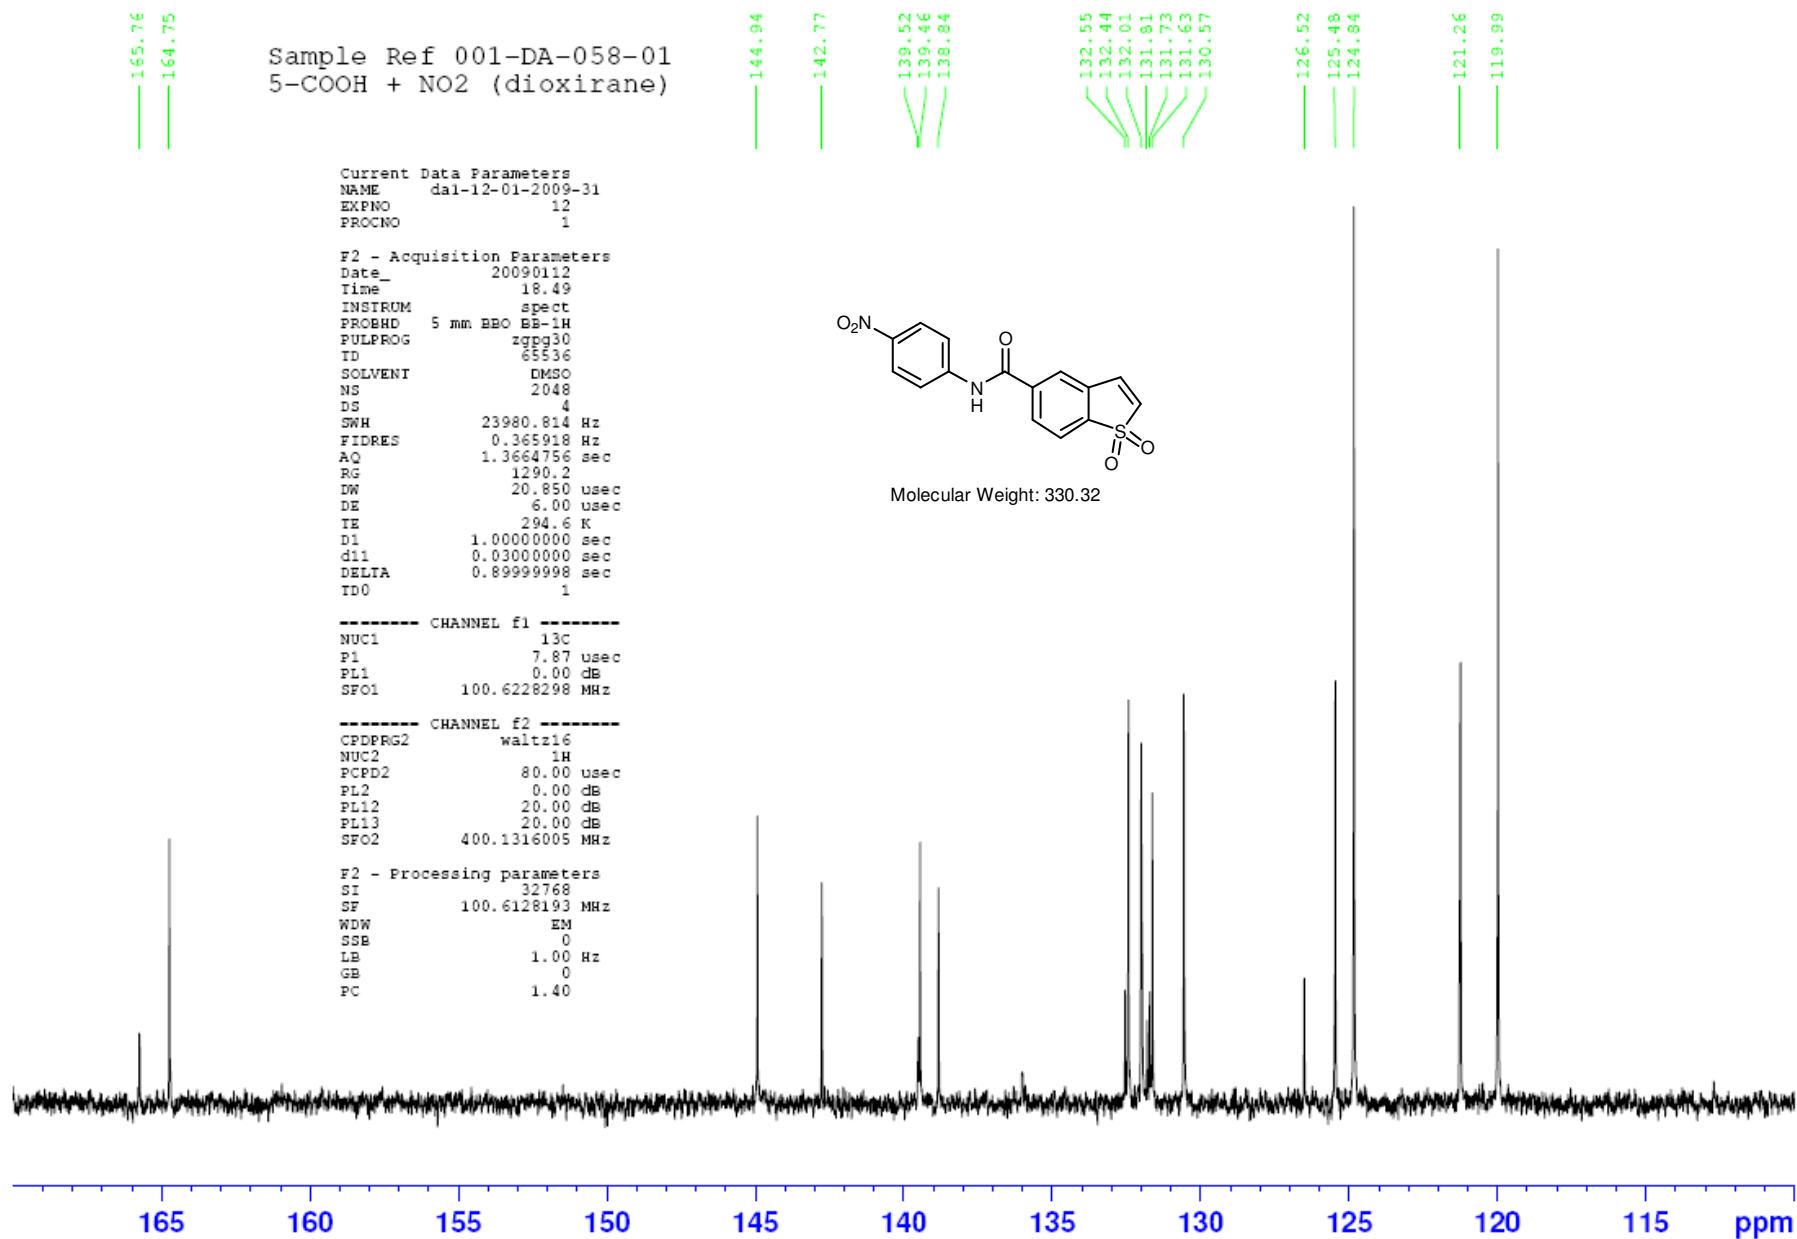

8.617  
8.613  
8.608

8.320  
8.317  
8.300  
8.296  
8.246  
8.229  
8.226

7.819  
7.800  
7.718  
7.698  
7.678  
7.659  
7.657  
7.640  
7.638  
7.622  
7.619  
7.600  
7.597  
7.581  
7.579  
7.563  
7.560  
7.505

Sample Ref 013-DA-119-01  
Sulfone formation

Current Data Parameters  
NAME dal-11-09-2007-53  
EXPNO 10  
PROCNO 1

F2 - Acquisition Parameters  
Date\_ 20070911  
Time 16.54  
INSTRUM spect  
PROBHD 5 mm BBO BB-1H  
PULPROG zg30  
TD 65536  
SOLVENT CDCl3  
NS 32  
DS 2  
SWH 8278.146 Hz  
FIDRES 0.126314 Hz  
AQ 3.9584243 sec  
RG 362  
DW 60.400 usec  
DE 6.00 usec  
TE 300.0 K  
D1 1.00000000 sec  
TD0 1

----- CHANNEL f1 -----  
NUC1 1H  
P1 7.86 usec  
PL1 0.00 dB  
SF01 400.1324710 MHz

F2 - Processing parameters  
SI 32768  
SF 400.1300095 MHz  
WDW EM  
SSB 0  
LB 0.30 Hz  
GB 0  
PC 1.00

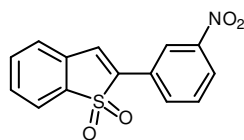

Molecular Weight: 287.29

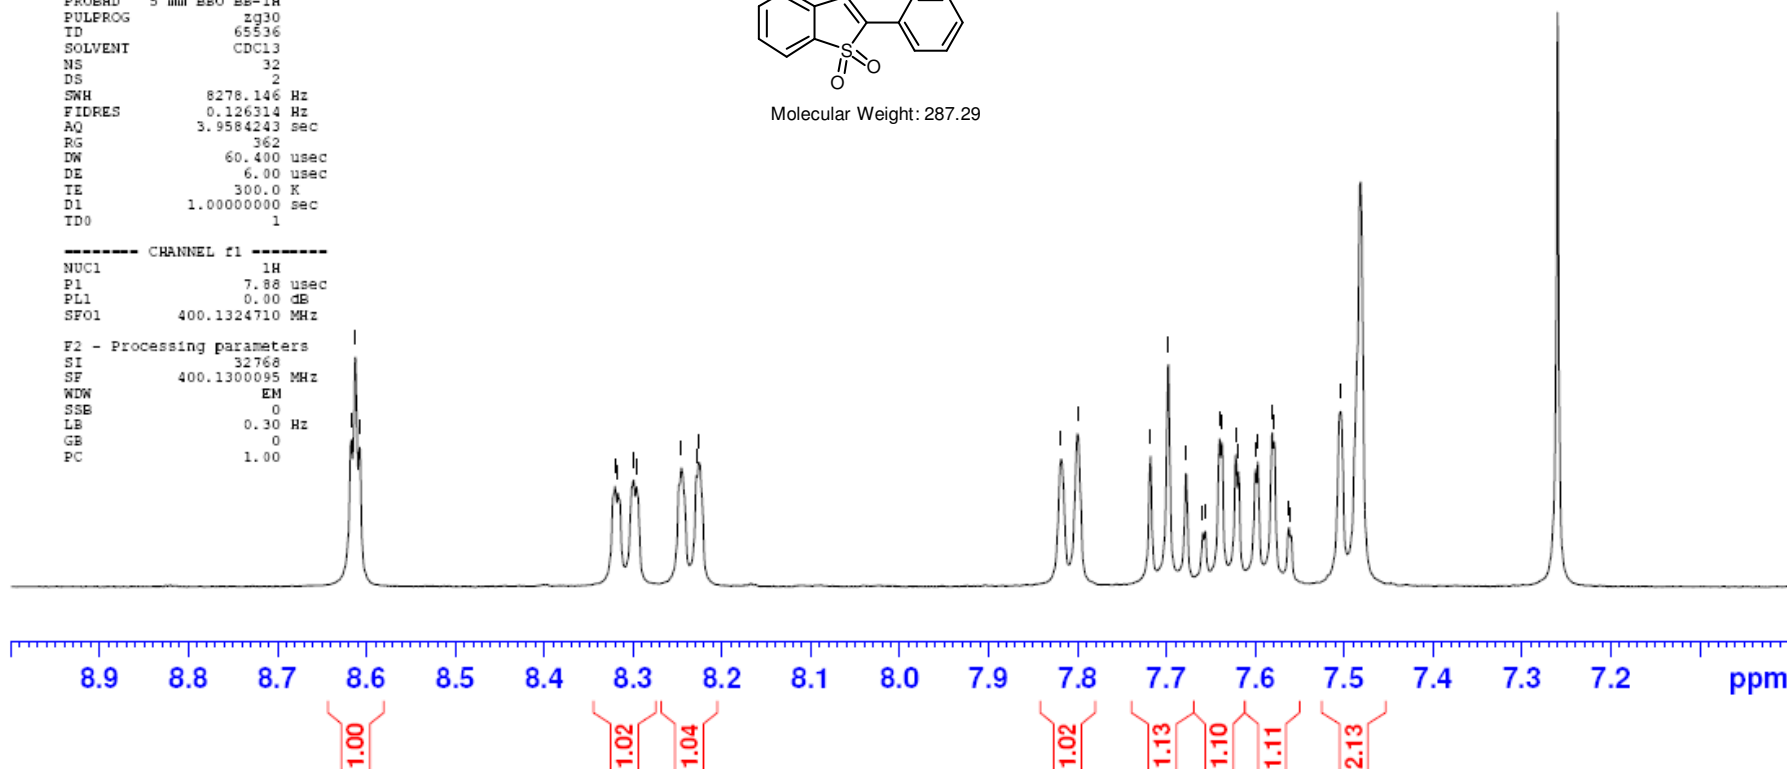

Sample Ref 013-DA-119-01  
Sulfone formation

Current Data Parameters  
NAME dal-11-09-2007-53  
EXPMO 12  
PROCNO 1

F2 - Acquisition Parameters  
Date\_ 20070911  
Time 17.34  
INSTRUM spect  
PROBHD 5 mm BBO BB-1H  
PULPROG zgpg30  
TD 65536  
SOLVENT CDCl3  
NS 512  
DS 4  
SWH 23980.814 Hz  
FIDRES 0.365918 Hz  
AQ 1.3664756 sec  
RG 4597.6  
DW 20.850 usec  
DE 6.00 usec  
TE 300.0 K  
D1 1.00000000 sec  
d11 0.03000000 sec  
DELTA 0.89999998 sec  
TD0 1

----- CHANNEL f1 -----  
NUC1 13C  
P1 7.65 usec  
PL1 0.00 dB  
SFO1 100.6228298 MHz

----- CHANNEL f2 -----  
CPDPRG2 waltz16  
NUC2 1H  
PCPD2 75.00 usec  
PL2 0.00 dB  
PL12 20.00 dB  
PL13 20.00 dB  
SFO2 400.1316005 MHz

F2 - Processing parameters  
SI 32768  
SF 100.6127690 MHz  
WDW EM  
SSB 0  
LB 1.00 Hz  
GB 0  
PC 1.40

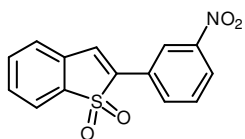

Molecular Weight: 287.29

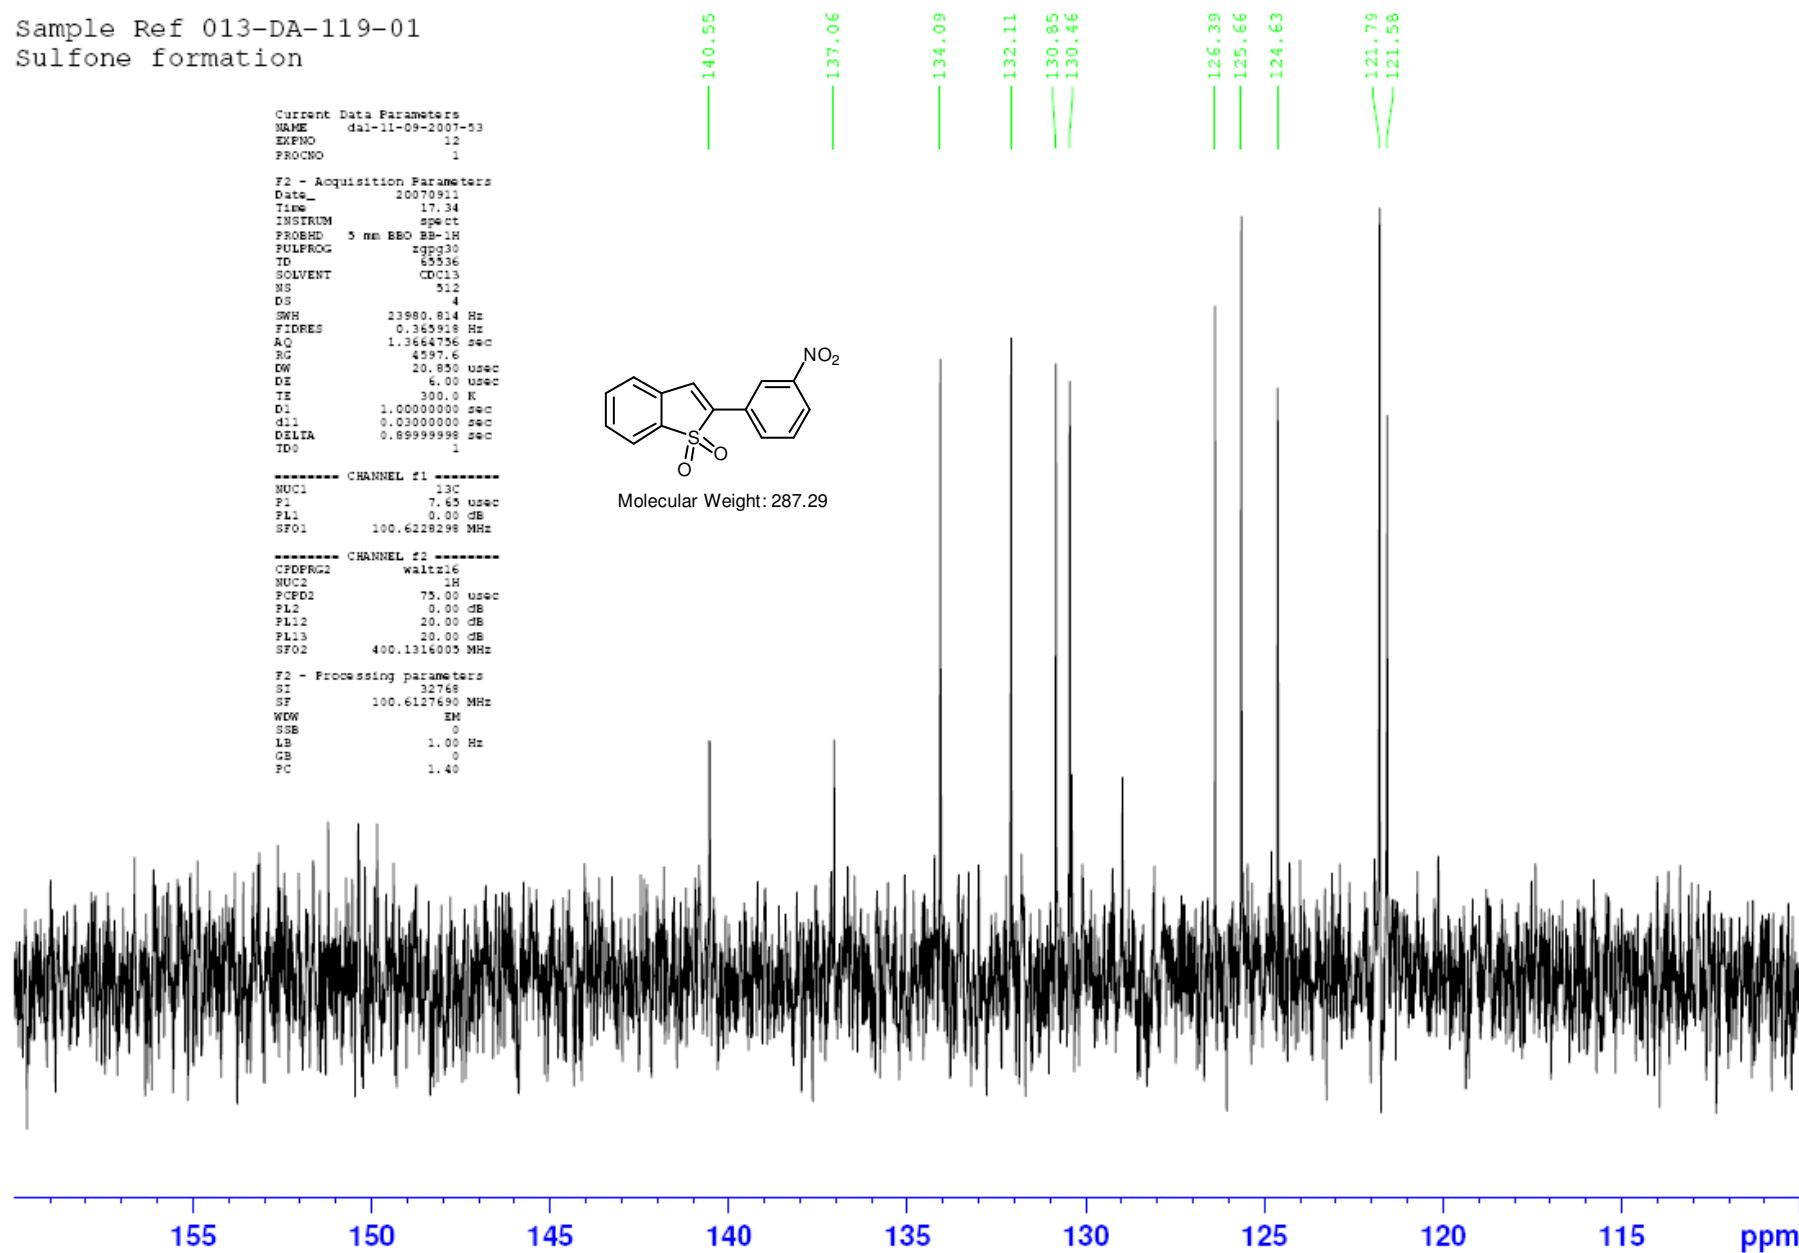

7.784  
7.766  
7.762  
7.511  
7.493  
7.441  
7.422  
7.404  
7.260

Sample Ref amine P205-H2O2 Reagent

4.006  
3.991  
3.976  
3.961

3.393  
3.378  
3.364

2.990

Current Data Parameters  
NAME dal-12-02-2009-17  
EXPNO 10  
PROCNO 1

F2 - Acquisition Parameters  
Date\_ 20090212  
Time\_ 12.24  
INSTRUM spect  
PROBHD 5 mm BBO BB-1H  
PULPROG zg30  
TD 65536  
SOLVENT CDCl3  
NS 128  
DS 2  
SWH 8278.146 Hz  
FIDRES 0.126314 Hz  
AQ 3.9584243 sec  
RG 143.7  
DW 60.400 usec  
DE 6.00 usec  
TE 300.0 K  
D1 1.00000000 sec  
TD0 1

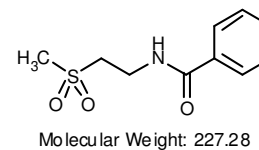

----- CHANNEL f1 -----  
NUC1 1H  
P1 7.88 usec  
PL1 0.00 dB  
SFO1 400.1324710 MHz

F2 - Processing parameters  
SI 32768  
SF 400.1300095 MHz  
WDW EM  
SSB 0  
LB 0.30 Hz  
GB 0  
PC 1.00

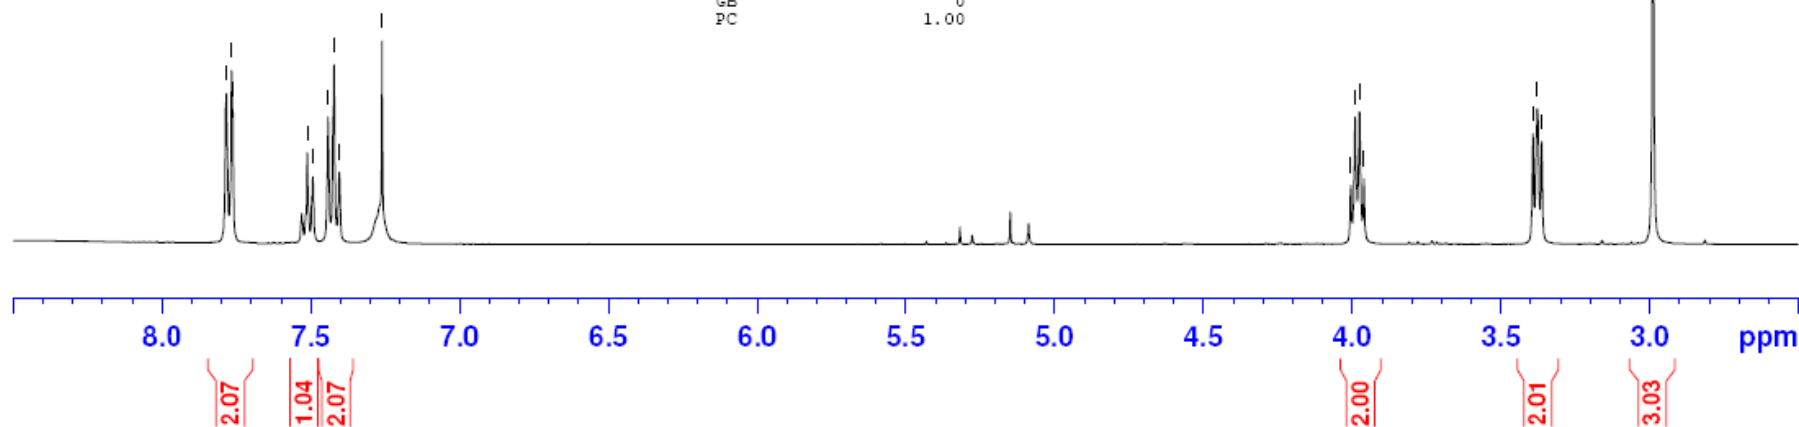

Current Data Parameters  
NAME dal-12-02-2009-17  
EXPNO 13  
PROCNO 1

F2 - Acquisition Parameters  
Date\_ 20090212  
Time 18.49  
INSTRUM spect  
PROBHD 5 mm BBO BB-1H  
PULPROG zgpg30  
TD 65536  
SOLVENT CDCl3  
NS 1024  
DS 4  
SWH 23980.814 Kz  
FIDRES 0.345918 Kz  
AQ 1.3644756 sec  
RG 16384  
DM 20.850 usec  
DE 6.00 usec  
TE 300.0 K  
CHST2 145.0000000  
d1 1.00000000 sec  
d2 0.00344828 sec  
d12 0.00002000 sec  
DELTA 0.00001002 sec  
TD0 1

CHANNEL F1  
NUC1 13C  
P1 7.87 usec  
PC 15.74 usec  
PL1 0.00 dB  
SFO1 100.6228298 MHz

CHANNEL F2  
CPDPRG2 waltz16  
NUC2 1H  
P3 8.00 usec  
P4 16.00 usec  
PCPD2 99.00 usec  
PL2 0.00 dB  
PL12 20.00 dB  
SFO2 400.1316005 MHz

F2 - Processing parameters  
SI 32768  
SF 100.6127690 MHz  
WDW EM  
SSB 0  
LB 1.00 Kz  
GB 0  
PC 1.40

Sample Ref amine P205-H2O2 Reagent

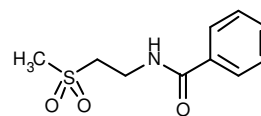

Molecular Weight: 227.28

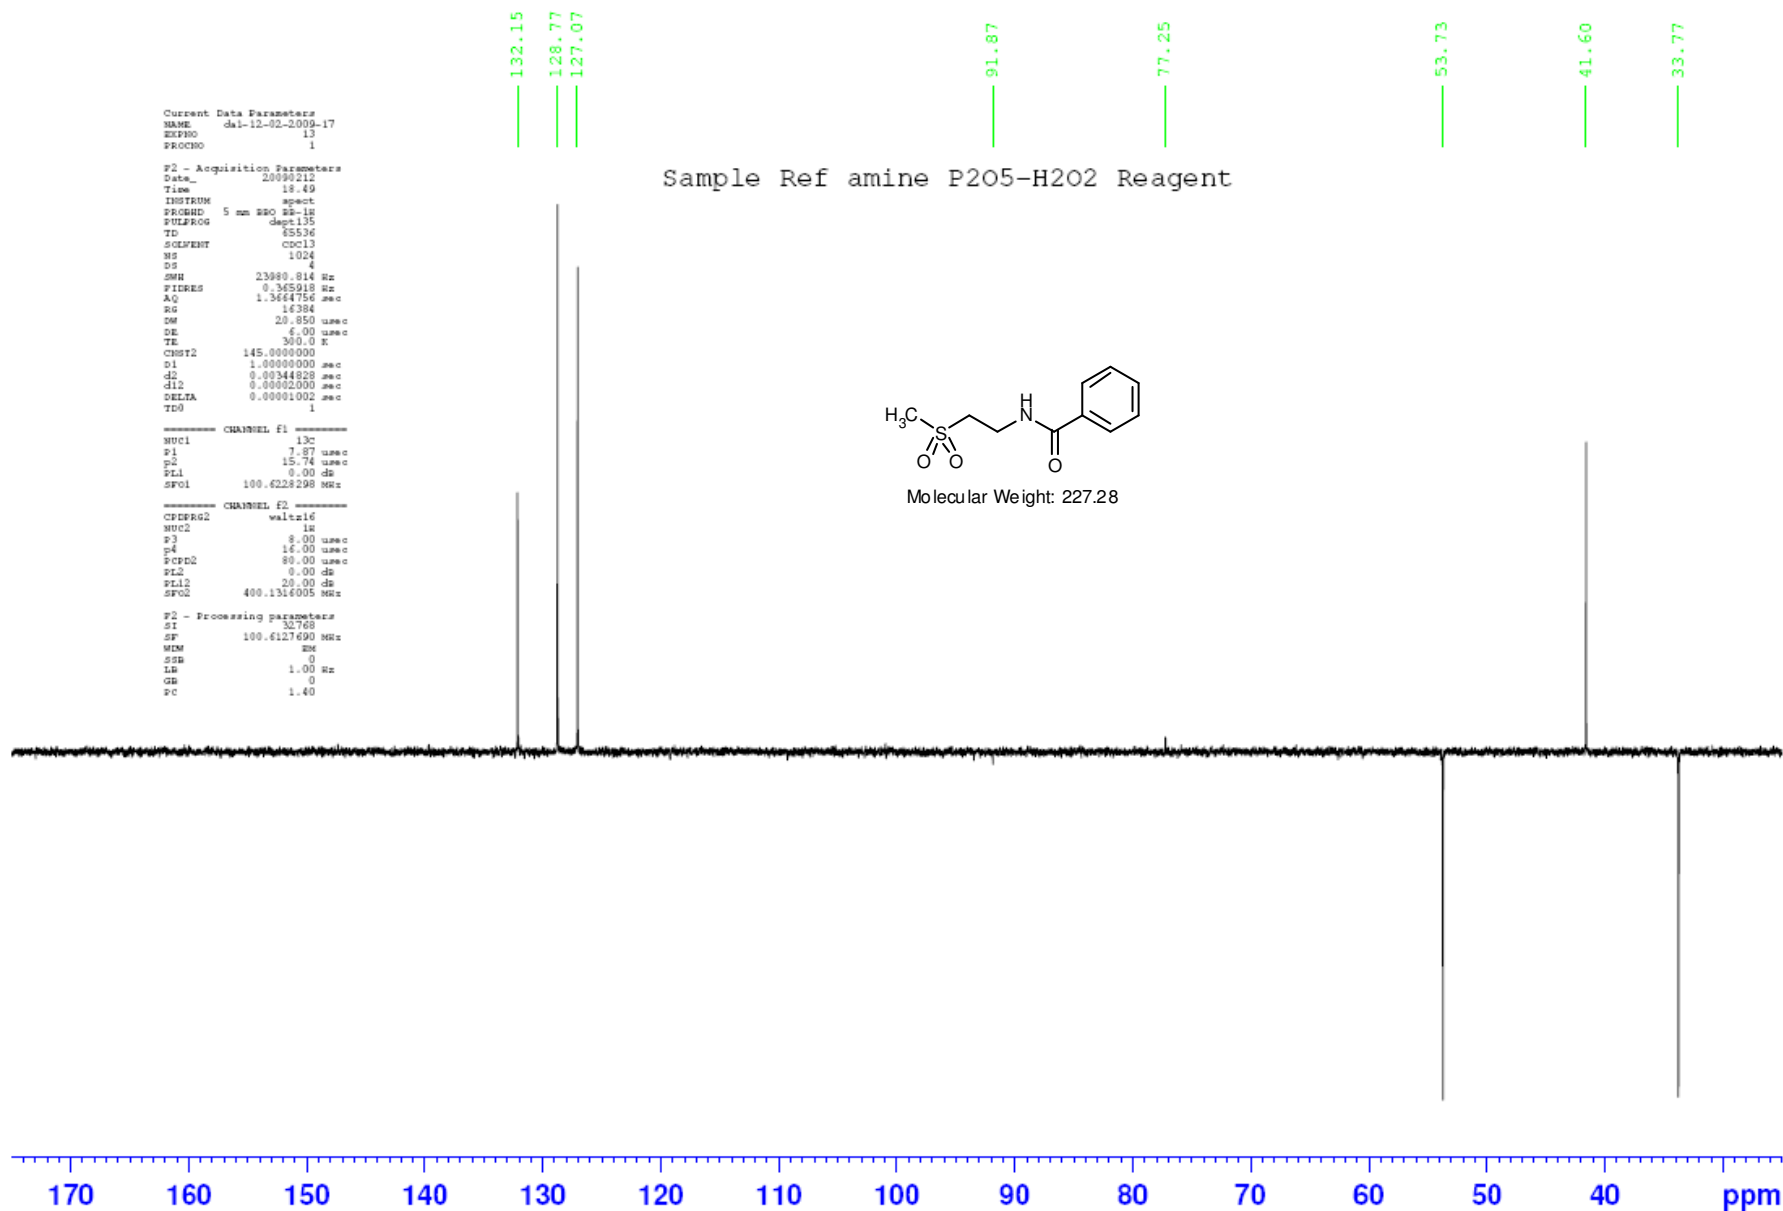



Sample Ref amine P205-H2O2 Reagent

Current Data Parameters  
NAME dsl-12-02-2009-17  
EXPNO 15  
PROCNO 1

F2 - Acquisition Parameters  
Date\_ 20090212  
Time 19.16  
INSTRUM spect  
PROBHD 5 mm BBO BB-1H  
PULPROG inv4gplrdgaf  
TD 1024  
SOLVENT cdc13  
NS 8  
DS 16  
SWH 4528.985 Hz  
FIDRES 4.422037 Hz  
AQ 0.1130996 sec  
RG 16384  
DW 110.400 usec  
DE 6.00 usec  
TE 300.1 K  
d0 0.00000300 sec  
d1 1.48320603 sec  
d6 0.07100000 sec  
d13 0.00000400 sec  
d16 0.00010000 sec  
IN0 0.00002240 sec

----- CHANNEL f1 -----  
NUC1 1H  
P1 7.88 usec  
PL1 15.75 usec  
FL1 0.00 dB  
SFO1 400.1322595 MHz

----- CHANNEL f2 -----  
NUC2 13C  
P2 7.65 usec  
PL2 0.00 dB  
SFO2 100.6227746 MHz

----- GRADIENT CHANNEL -----  
GPNAM1 SINE.100  
GPNAM2 SINE.100  
GPNAM3 SINE.100  
GPE1 50.00 %  
GPE2 30.00 %  
GPE3 40.10 %  
P16 1000.00 usec

F1 - Acquisition parameters  
ND0 2  
TD 128  
SFO1 100.6228 MHz  
FIDRES 174.386154 Hz  
SW 221.833 ppm  
FNM002 QF

F2 - Processing parameters  
SI 1024  
SF 400.1300345 MHz  
WDW SINE  
SSB 0  
LB 0.00 Hz  
GB 0  
PC 1.40

F1 - Processing parameters  
SI 1024  
MC2 QF  
SF 100.6127690 MHz  
WDW SINE  
SSB 0  
LB 0.00 Hz  
GB 0

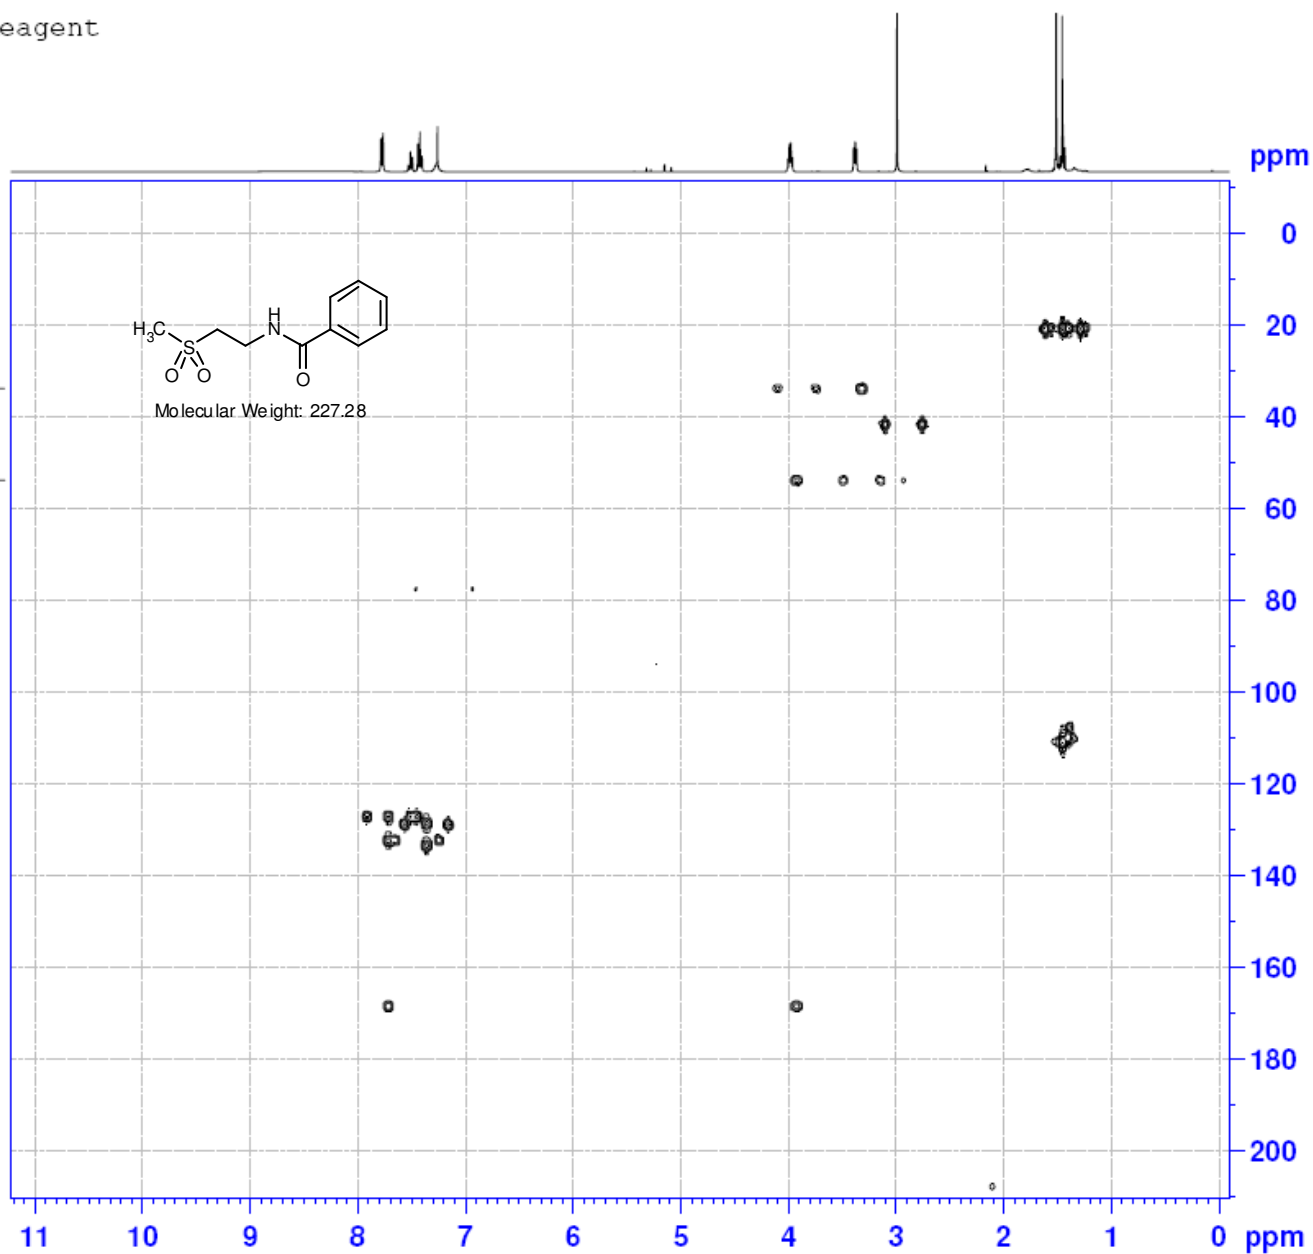

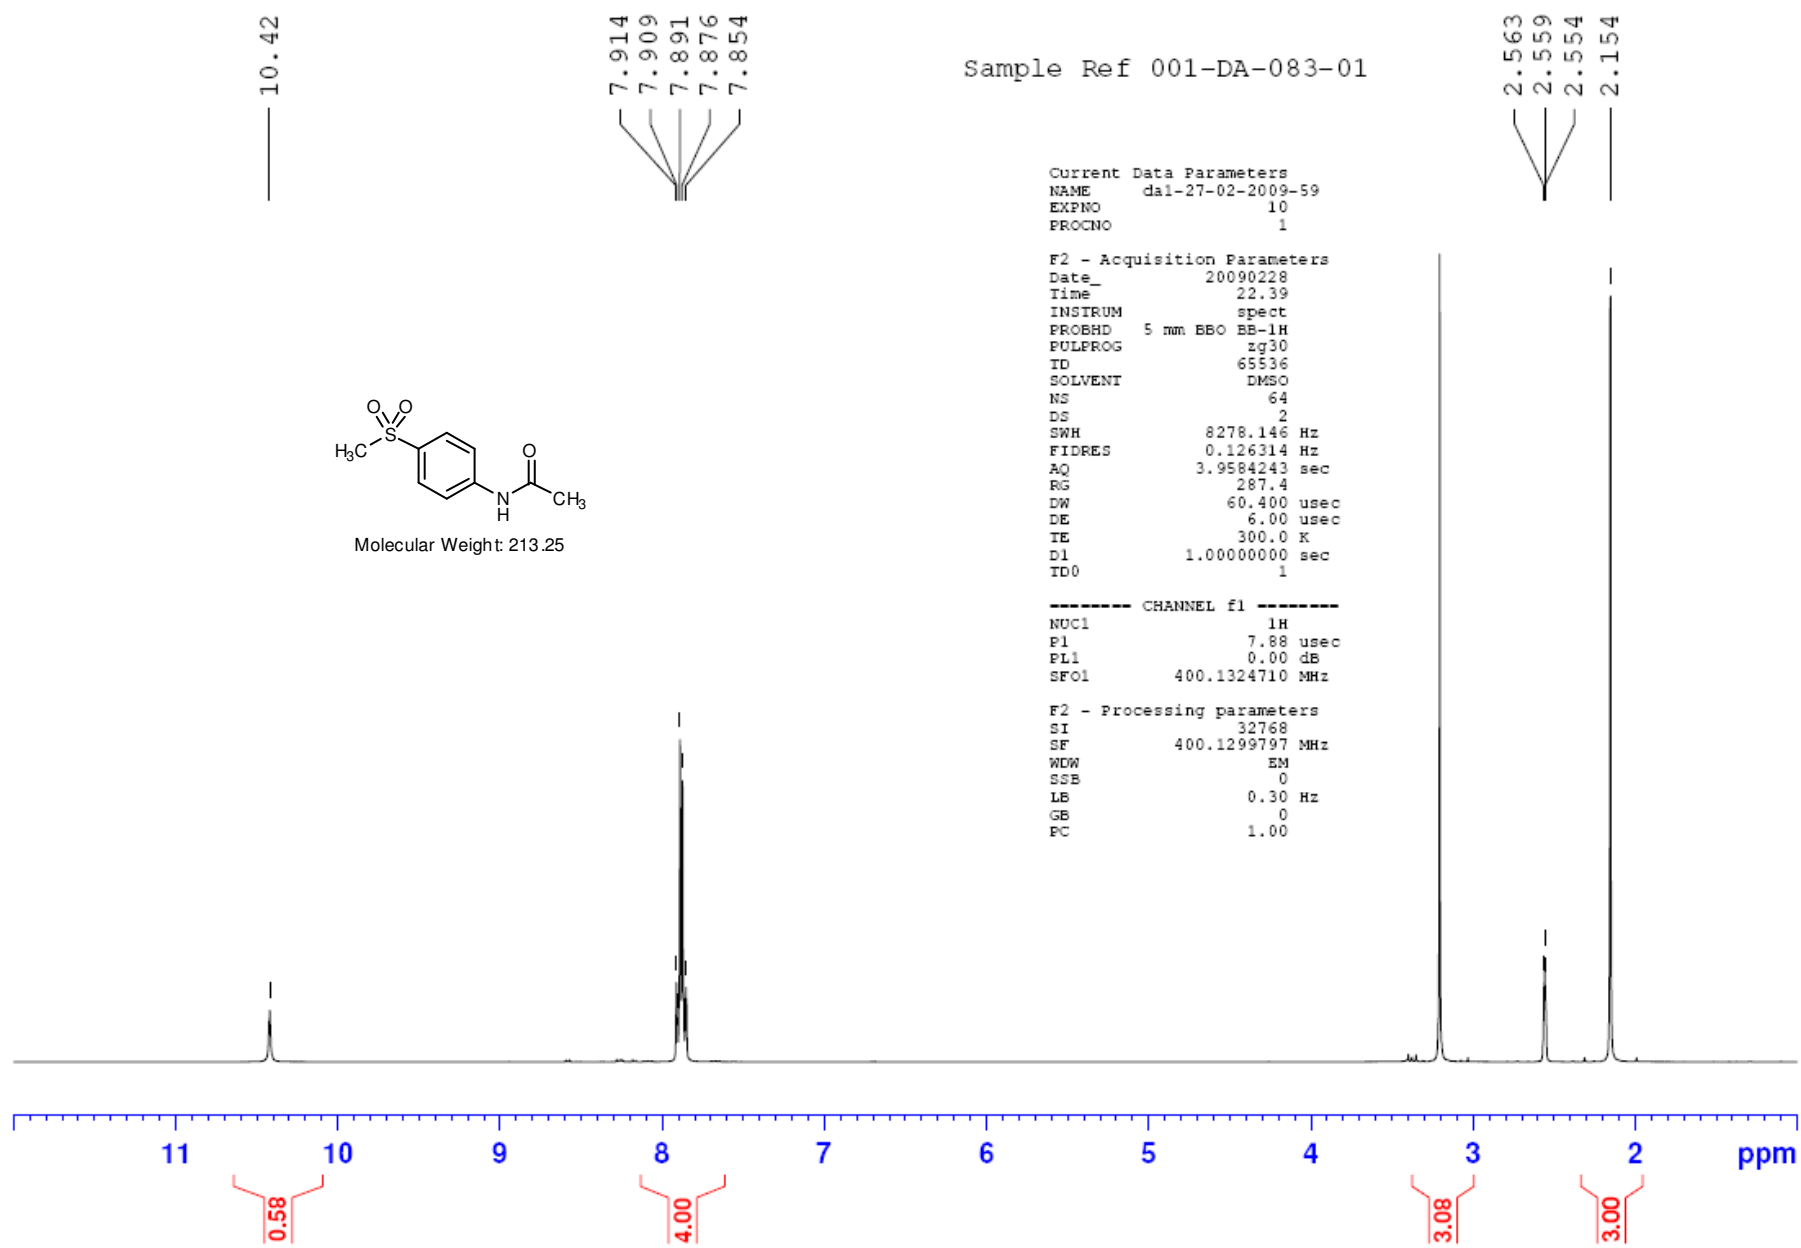

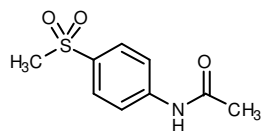

Molecular Weight: 213.25

Sample Ref 001-DA-083-01

Current Data Parameters  
NAME dal-27-02-2009-59  
EXPNO 12  
PROCNO 1

F2 - Acquisition Parameters  
Date\_ 20090301  
Time 0.21  
INSTRUM spect  
PROBHD 5 mm BBO BB-1H  
PULPROG zgpg30  
TD 65536  
SOLVENT DMSO  
NS 2048  
DS 4  
SWH 23980.814 Hz  
FIDRES 0.365918 Hz  
AQ 1.3664756 sec  
RG 4096  
DW 20.850 usec  
DE 6.00 usec  
TE 300.0 K  
D1 1.00000000 sec  
d11 0.03000000 sec  
DELTA 0.89999998 sec  
TD0 1

===== CHANNEL f1 =====  
NUC1 13C  
P1 7.97 usec  
PL1 0.00 dB  
SFO1 100.6228298 MHz

===== CHANNEL f2 =====  
CFDPRG2 waltz16  
NUC2 1H  
PCPD2 80.00 usec  
PL2 0.00 dB  
PL12 20.00 dB  
PL13 20.00 dB  
SFO2 400.1316005 MHz

F2 - Processing parameters  
SI 32768  
SF 100.6128193 MHz  
WDW EM  
SSB 0  
LB 1.00 Hz  
GB 0  
PC 1.40

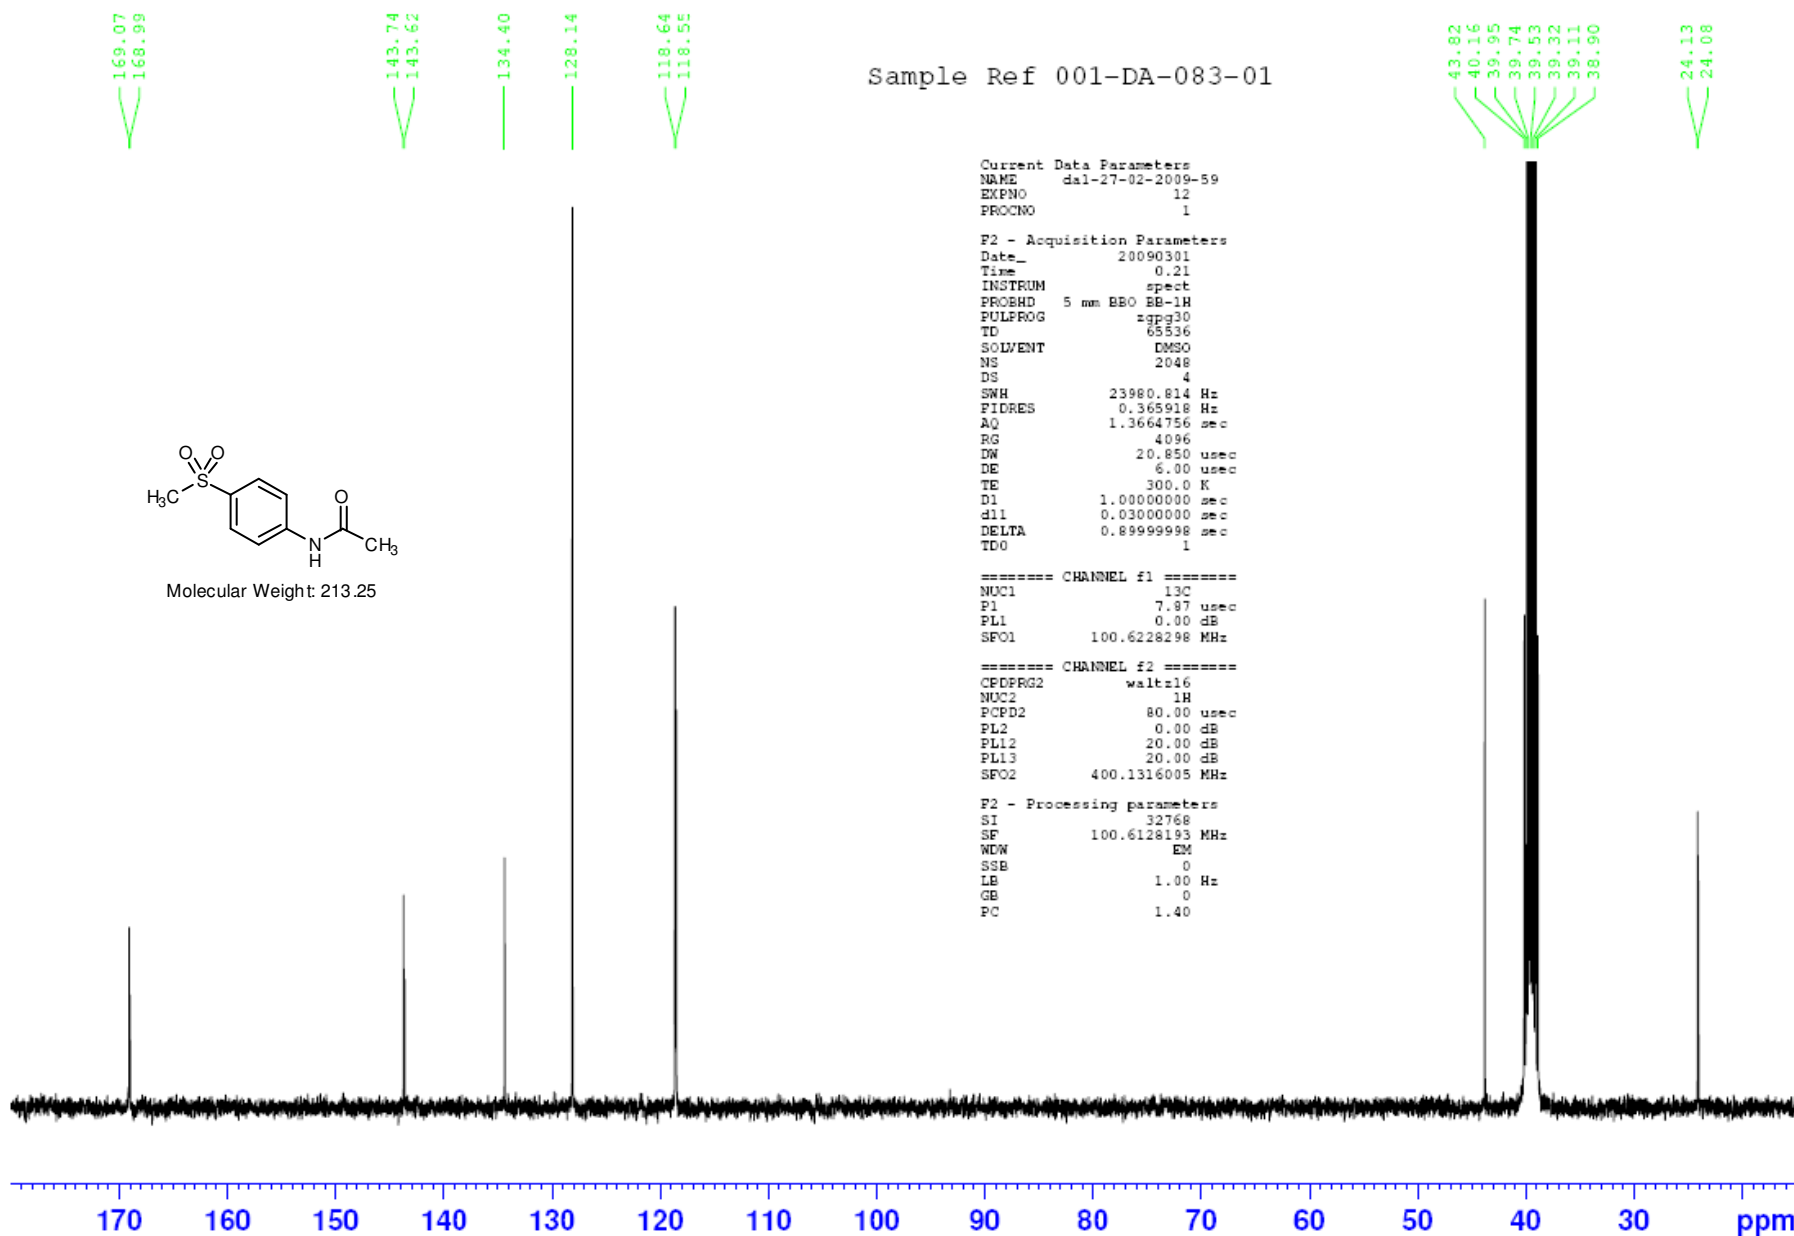

**IR spectra for all novel compounds**

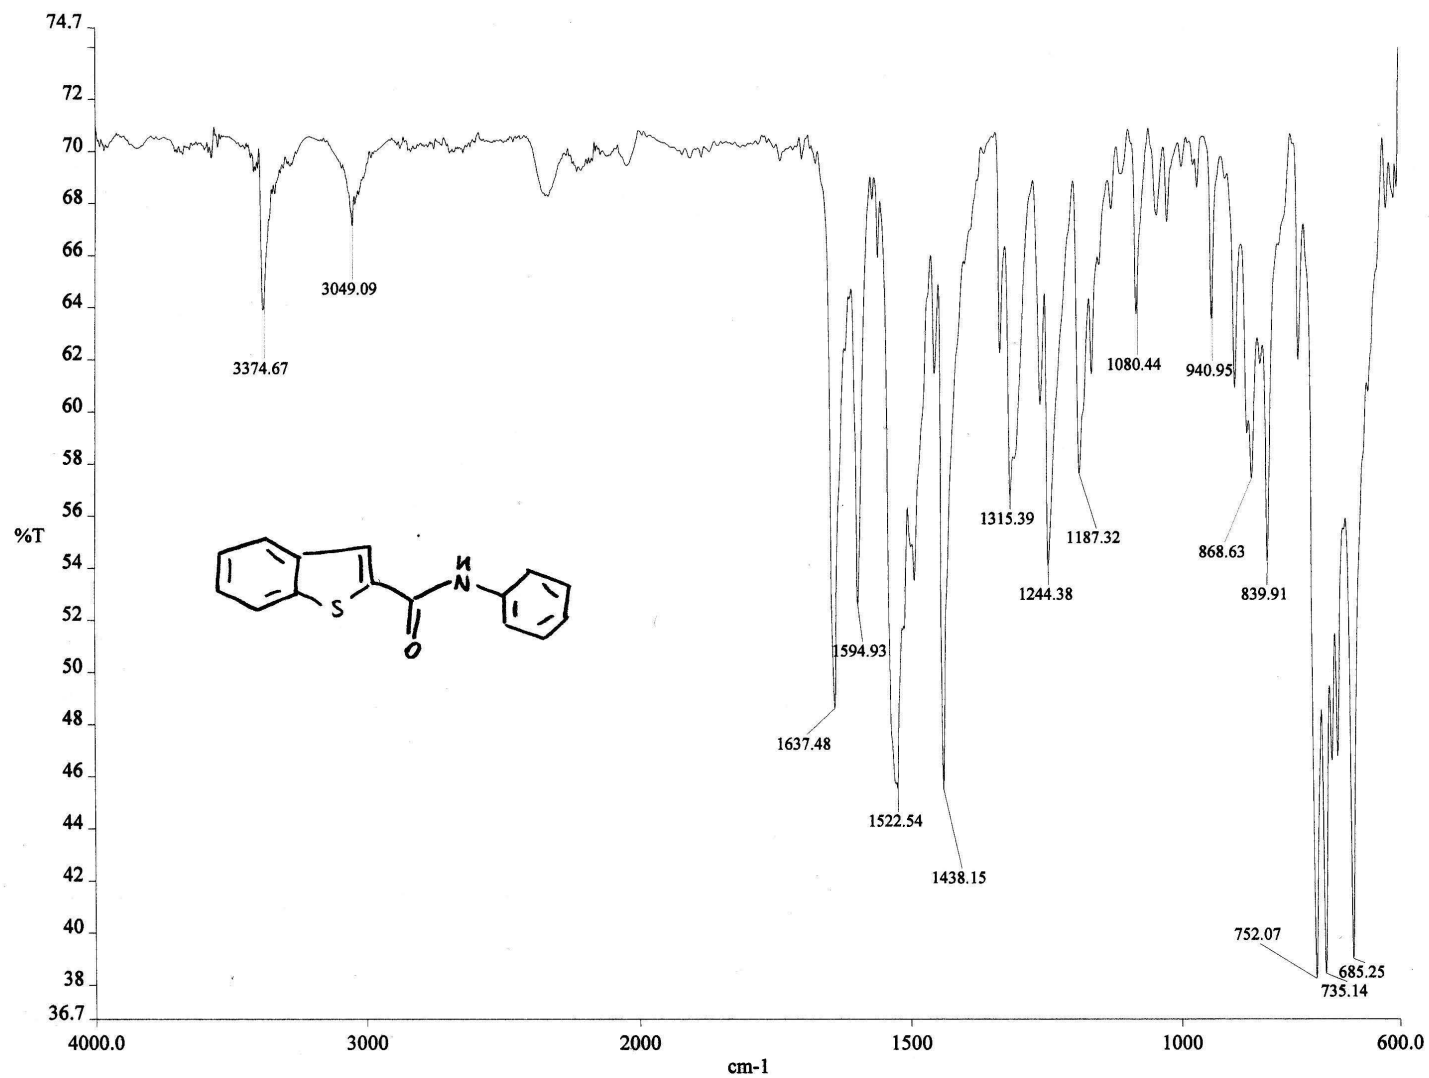

c:\pel\_data\spectra\dyeison\001-da-030-01.sp - 001-DA-030-01

100% 480 mg

m.p. 205-207 °C

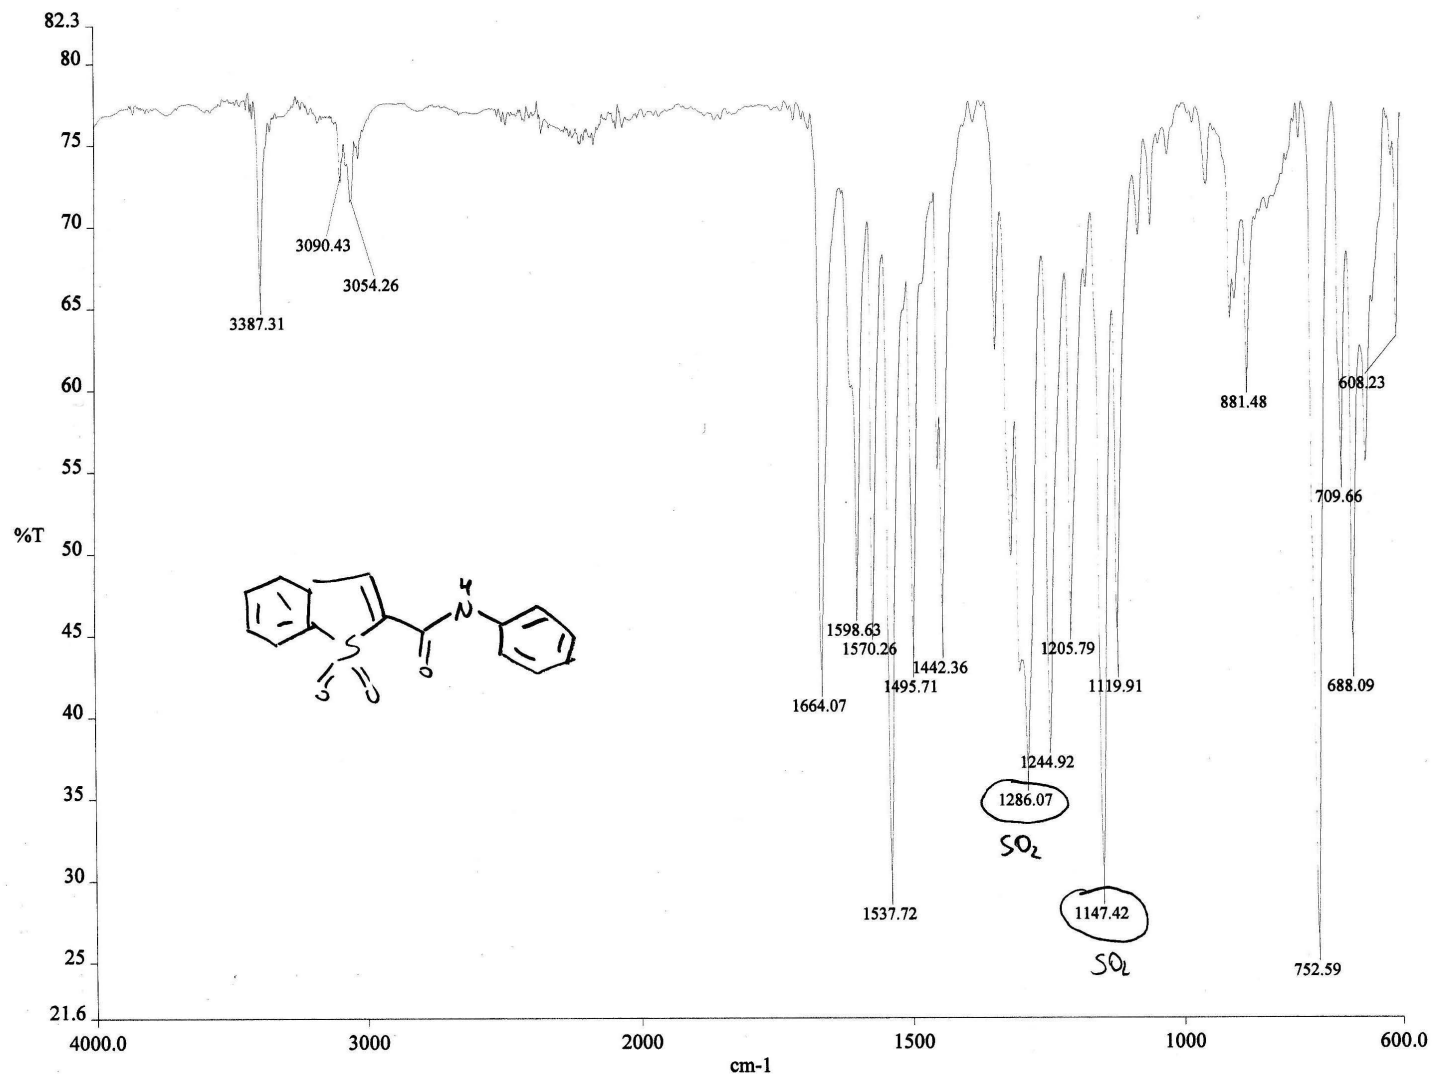

c:\pel\_data\spectra\dyeison\001-da-038-01.sp - 001-DA-038-01

m.p. 245-246

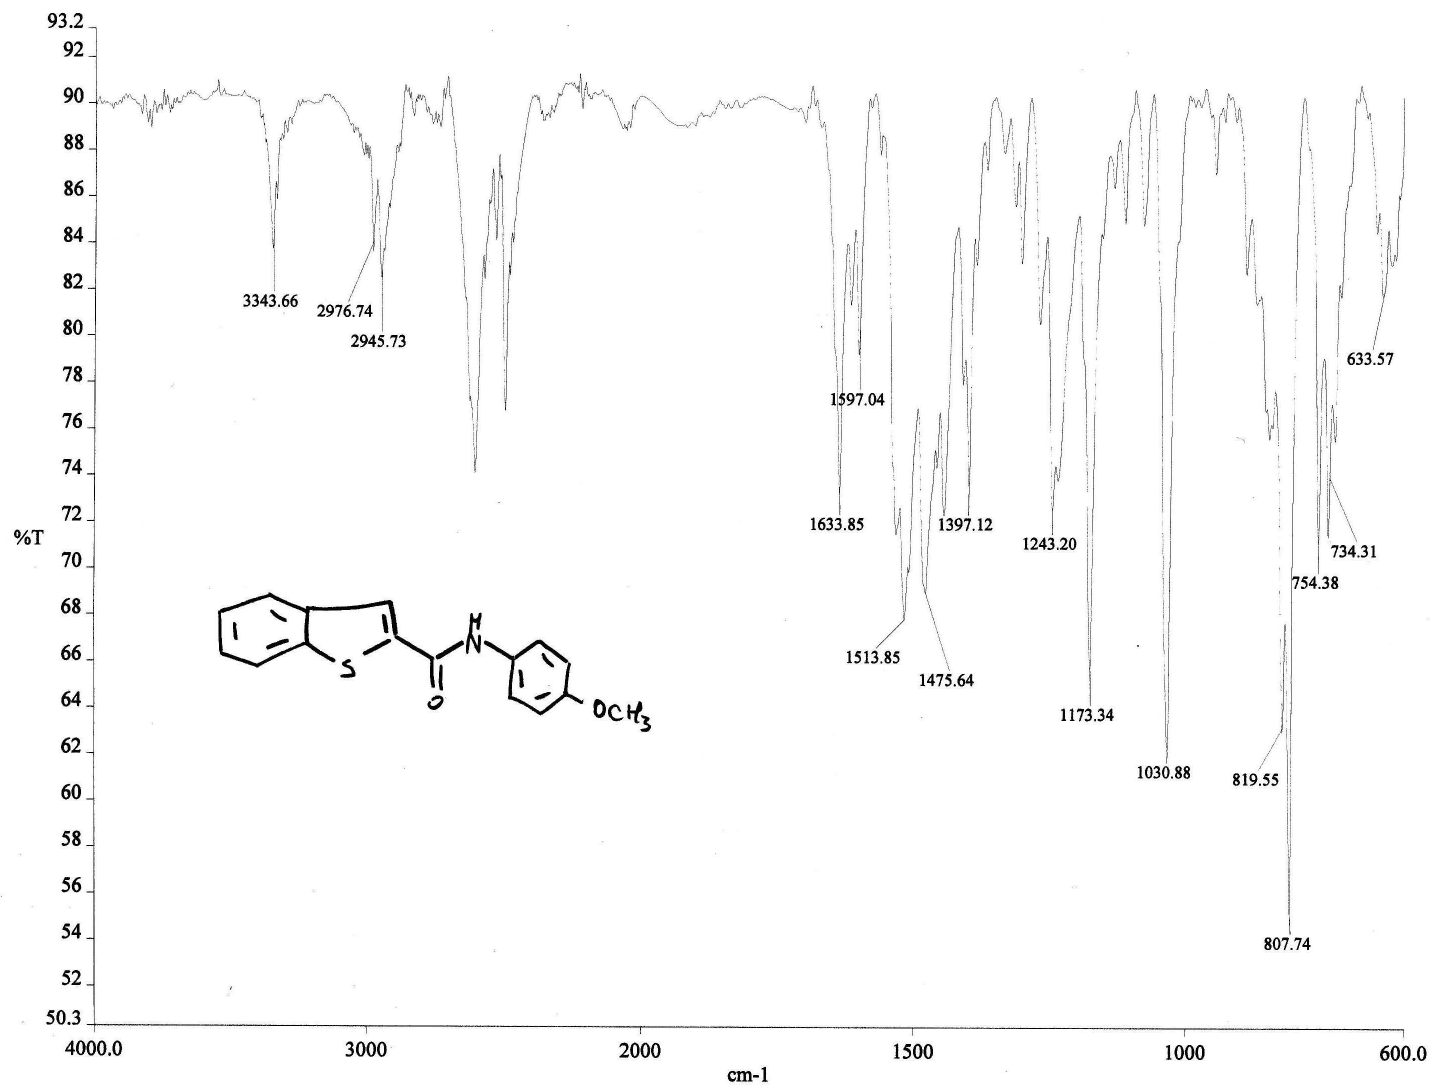

c:\pel\_data\spectra\dyeison\001-da-031-02.sp - 001-DA-031-02

226-229

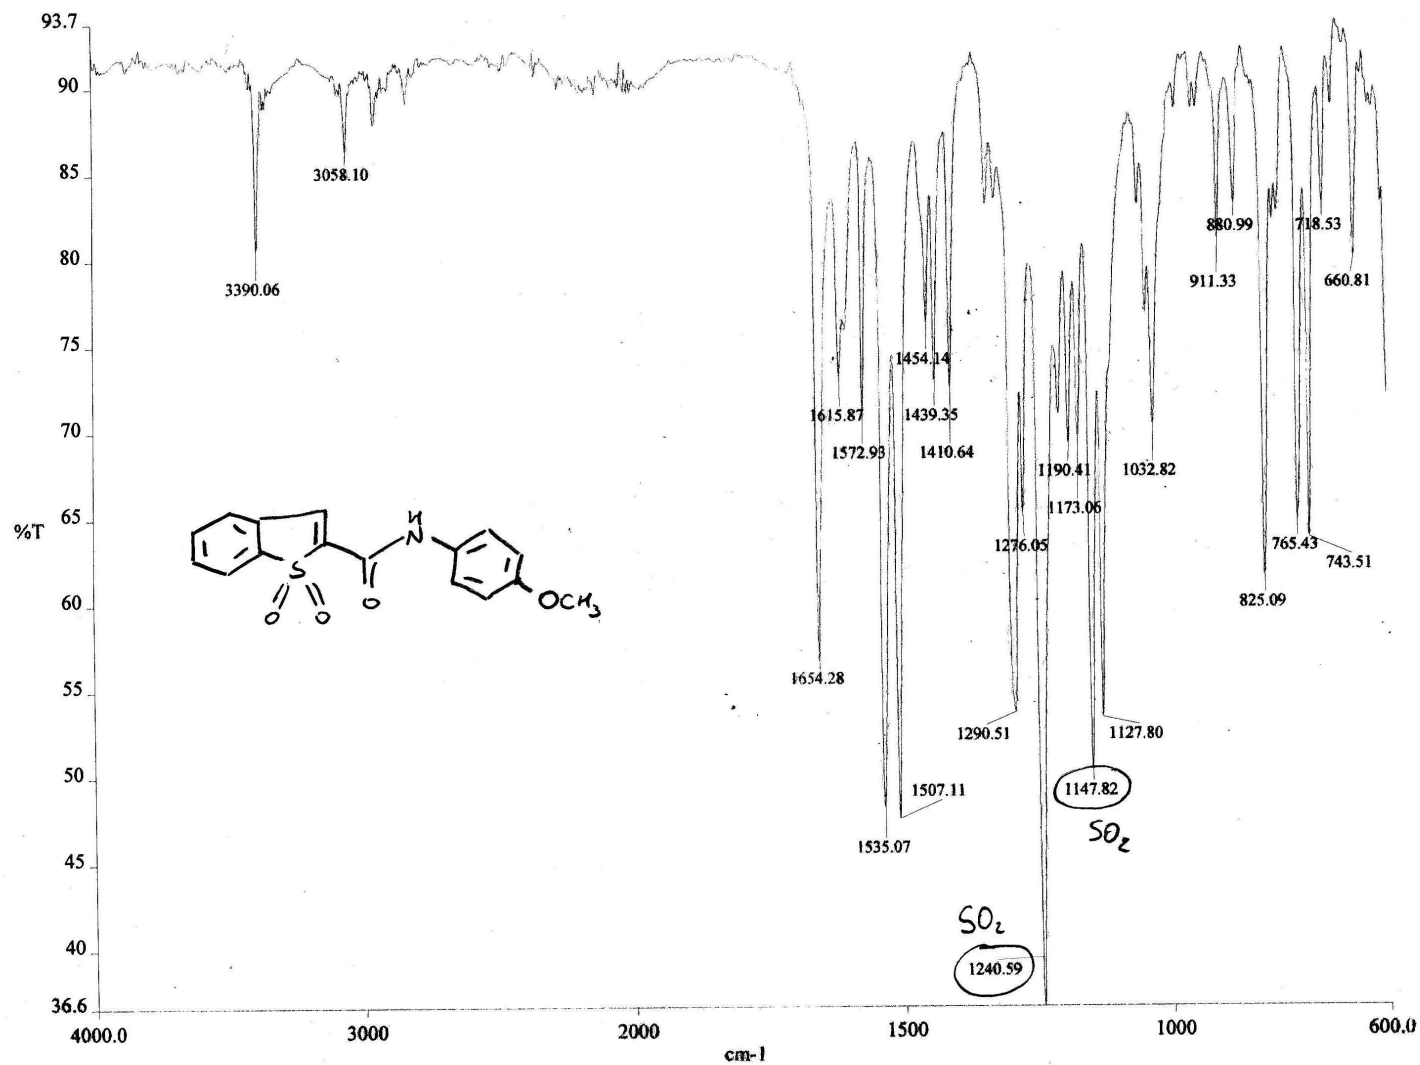

c:\pel\_data\spectra\dyeison\001-da-050-01.sp - 2-CONH + CMe (dioxirane)



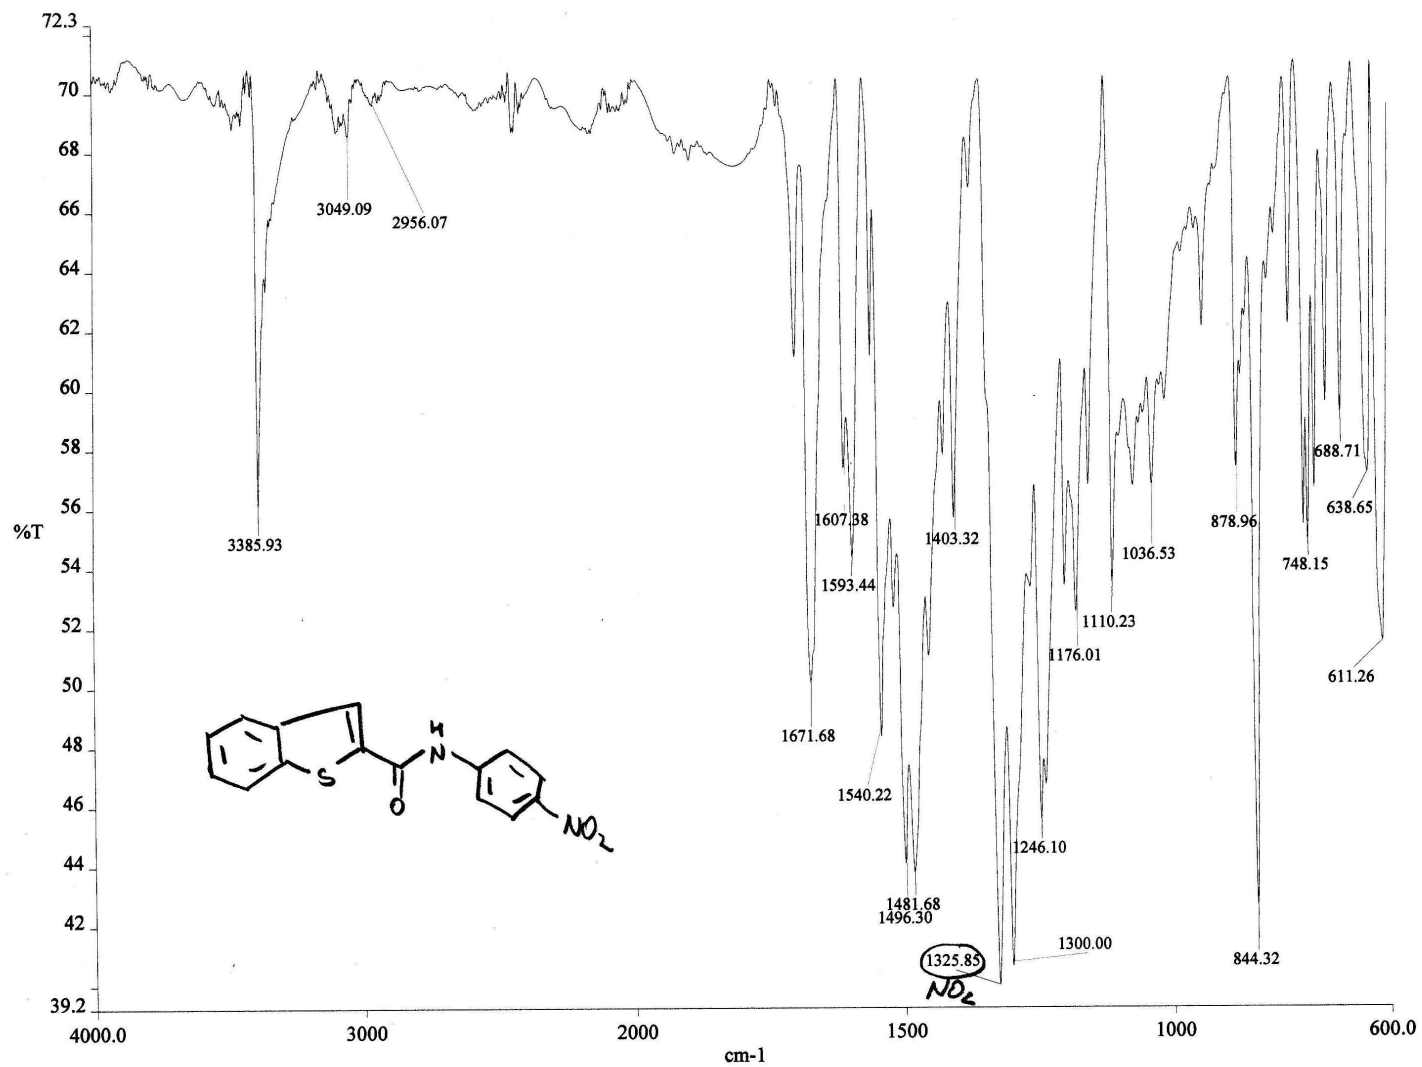

c:\pel\_data\spectra\001-da-029-01.002 - 001-DA-029-01

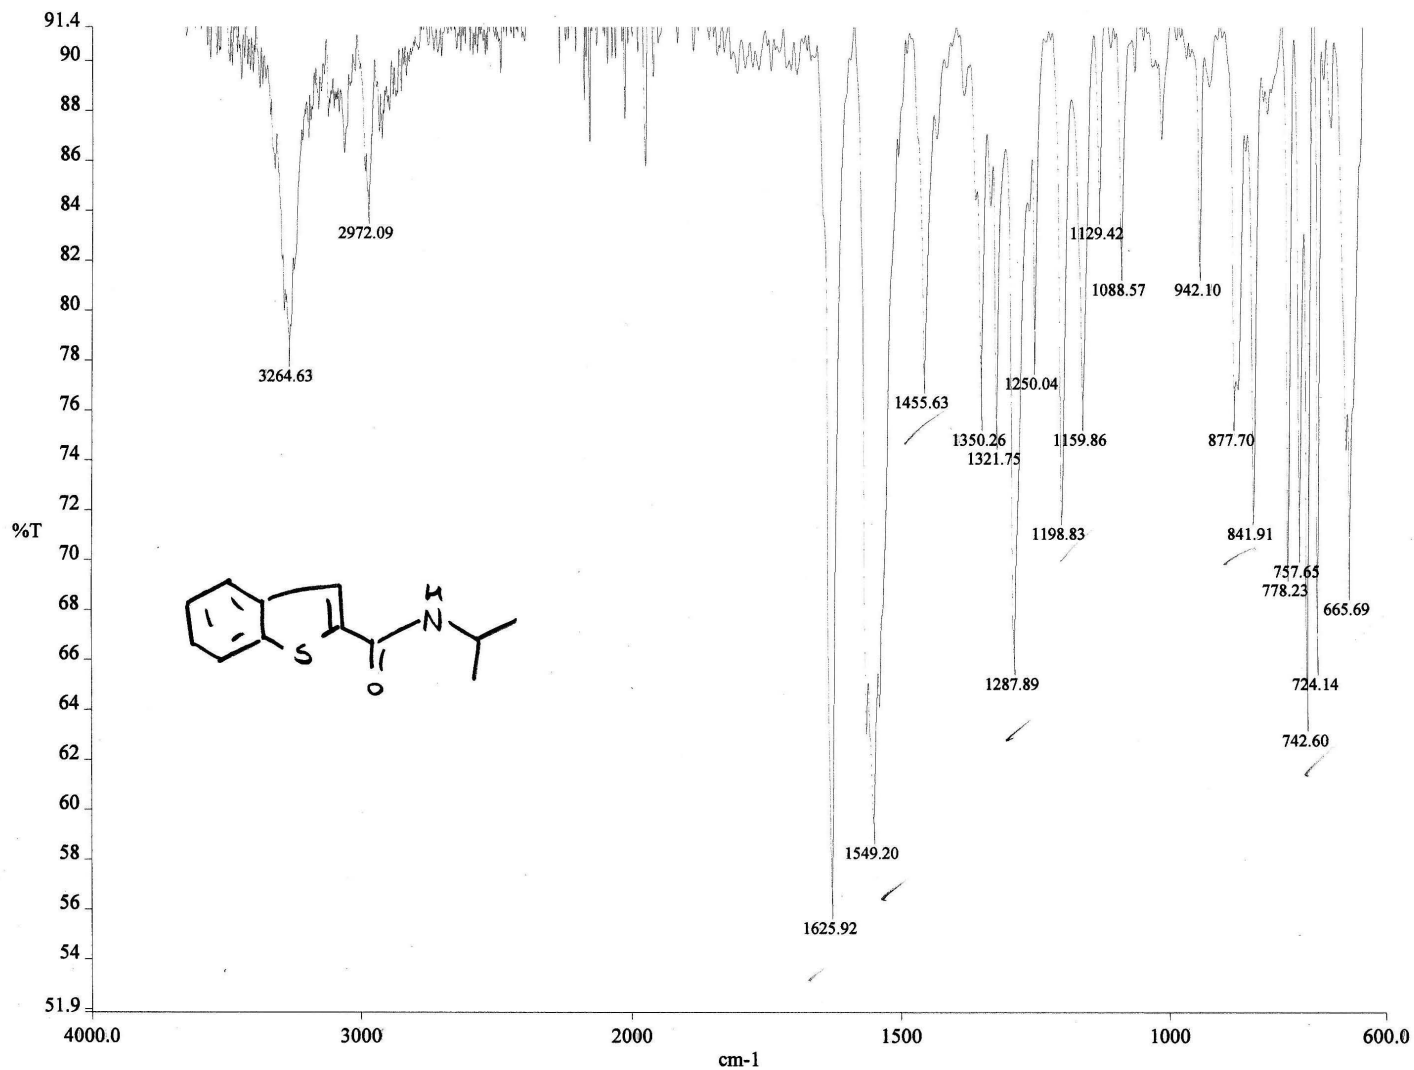

c:\pel\_data\spectra\s1c18.sp

147.7 - 148.5°C Rf = 0.50 (EA)

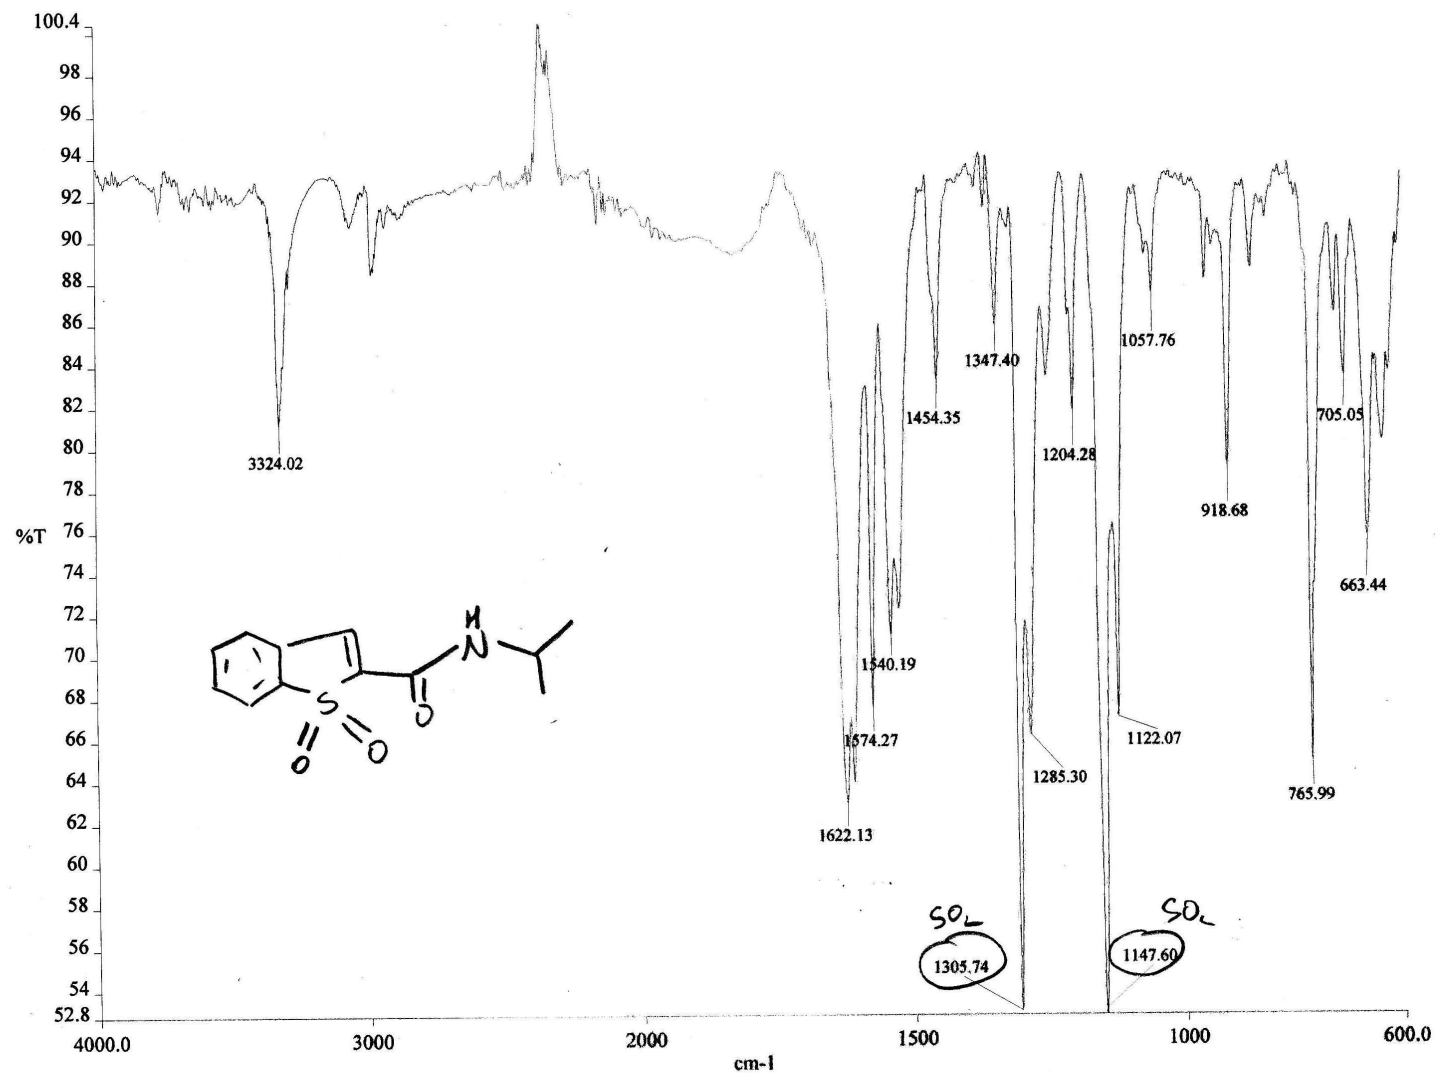

c:\pel\_data\spectra\dyeison\c18.sp

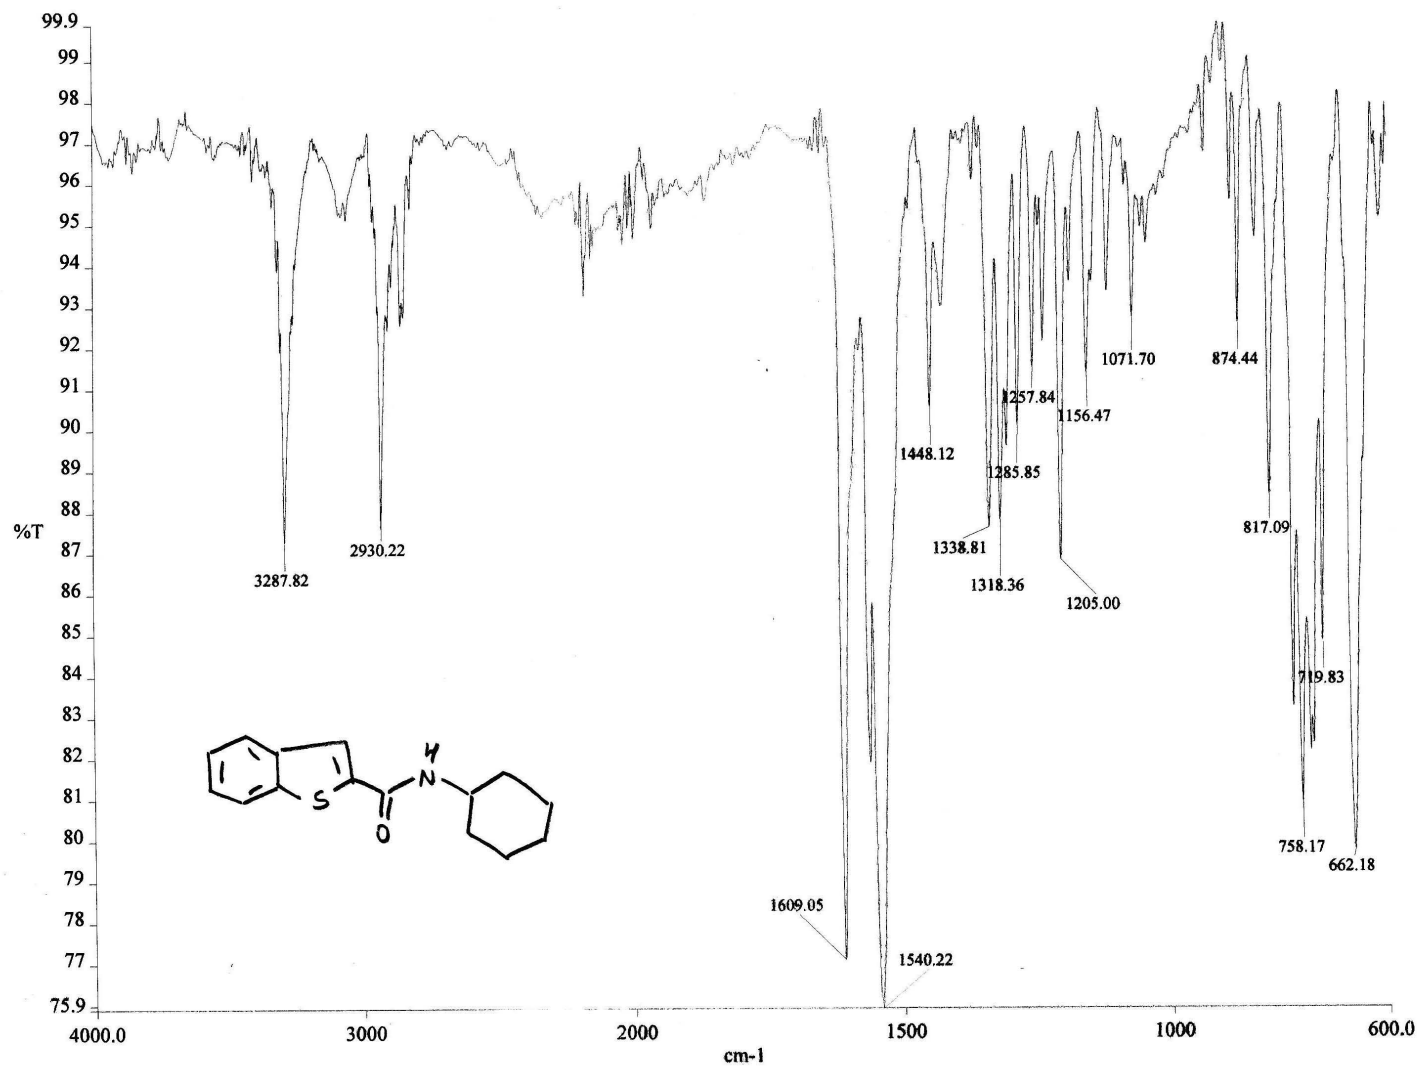

c:\pel\_data\spectra\ashed\1c17.002

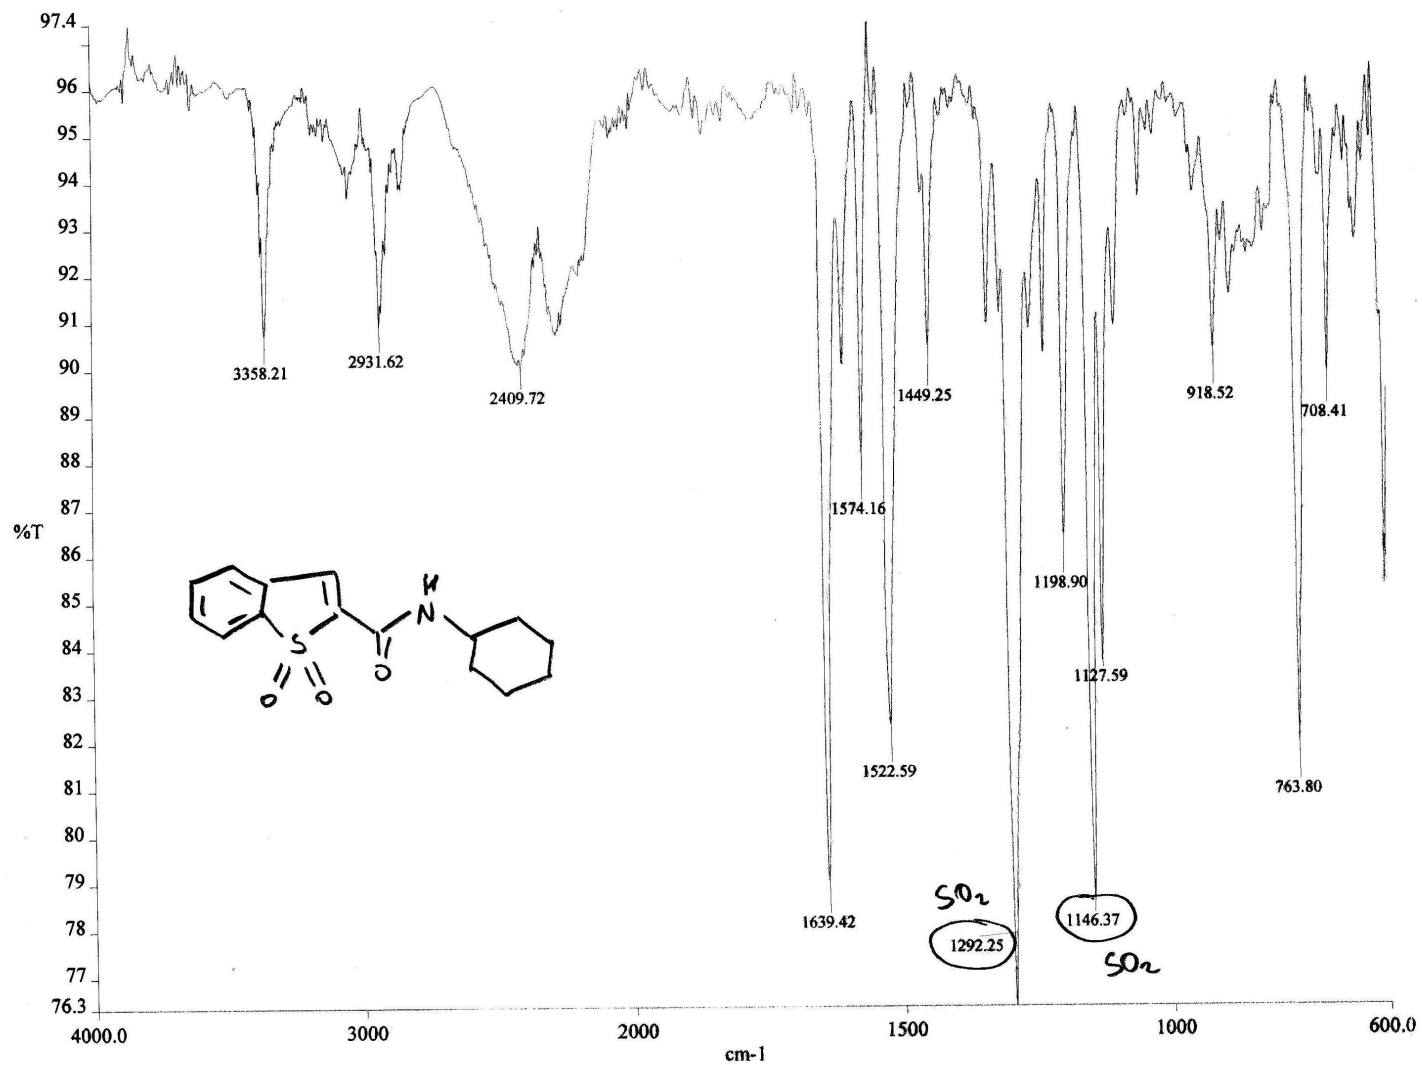

c:\pel\_data\spectra\dyeison\c17.sp

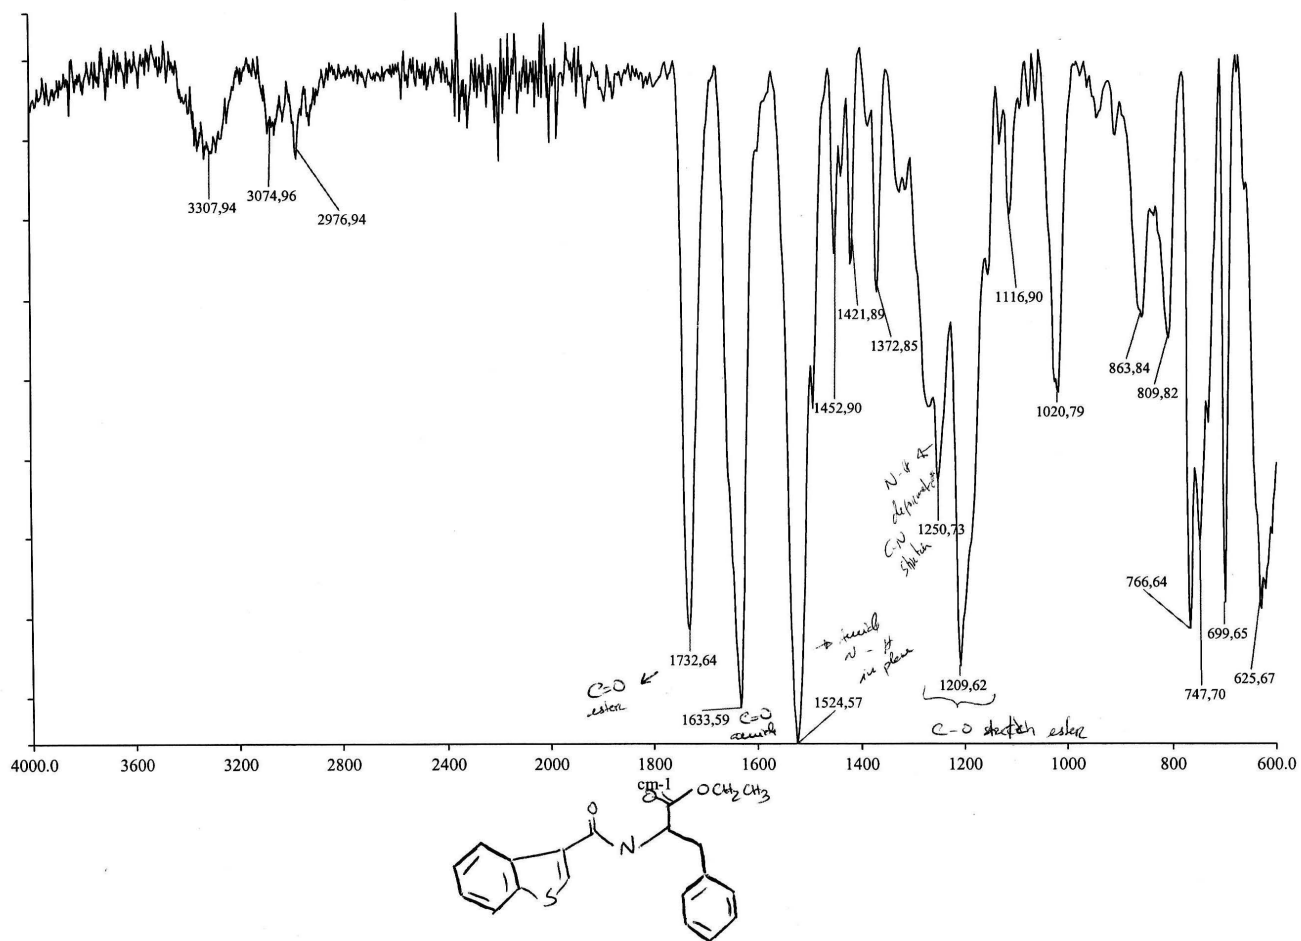

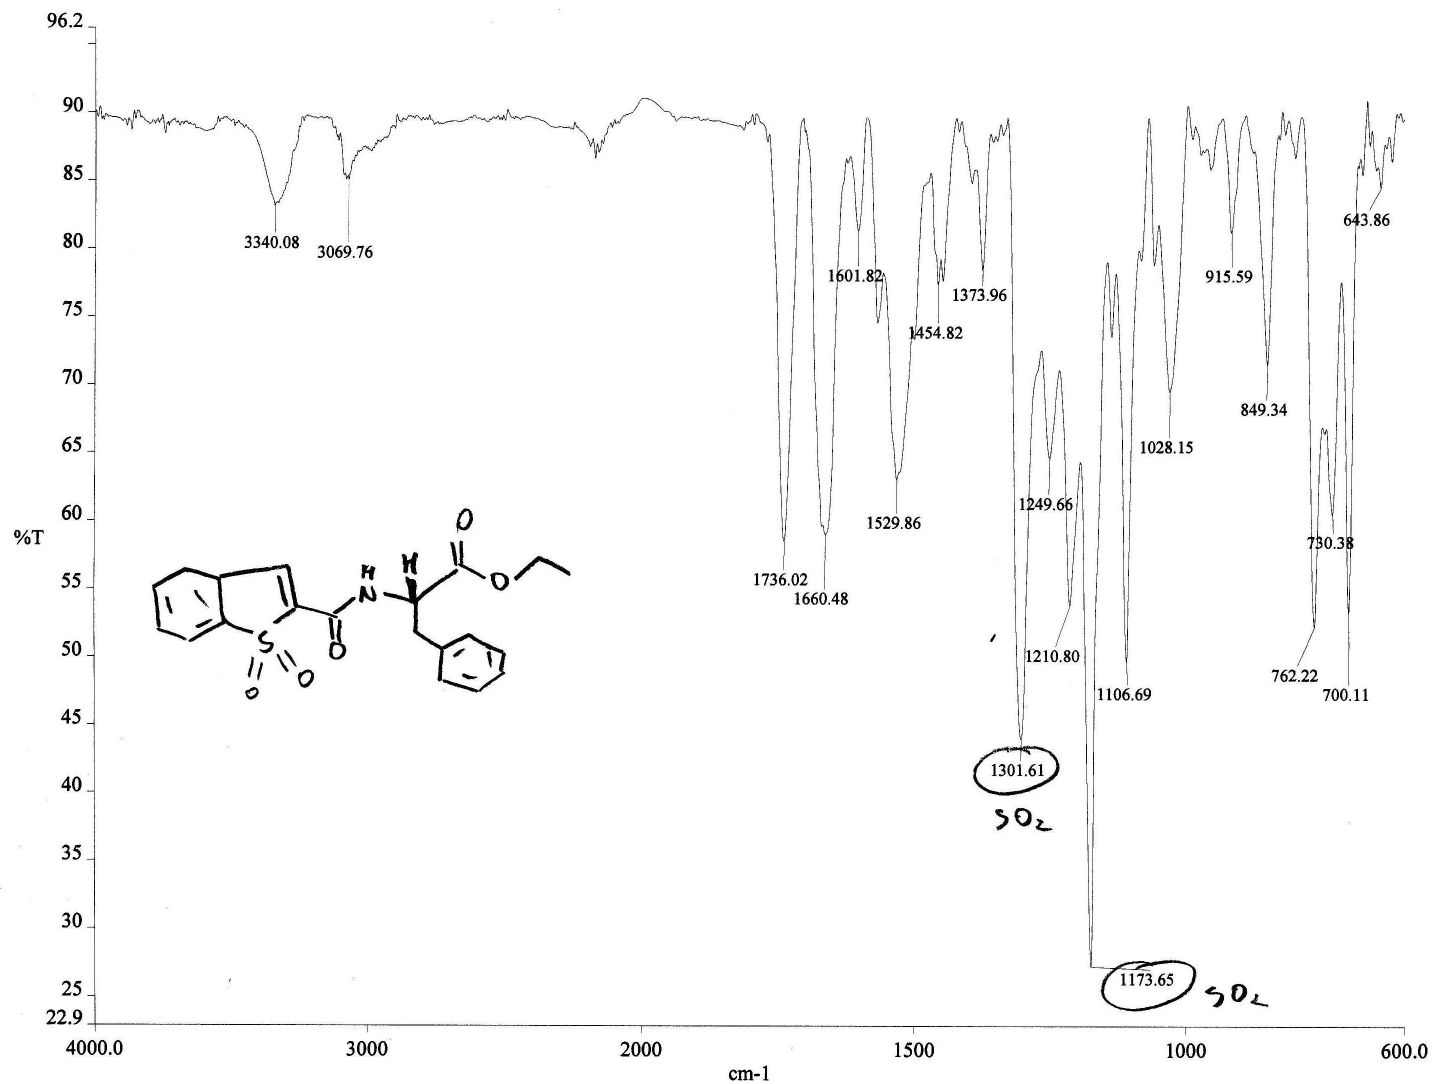

c:\pel\_data\spectra\dyeison\001-da-059-01.sp - 026-TM-048-01 (dioxirane)

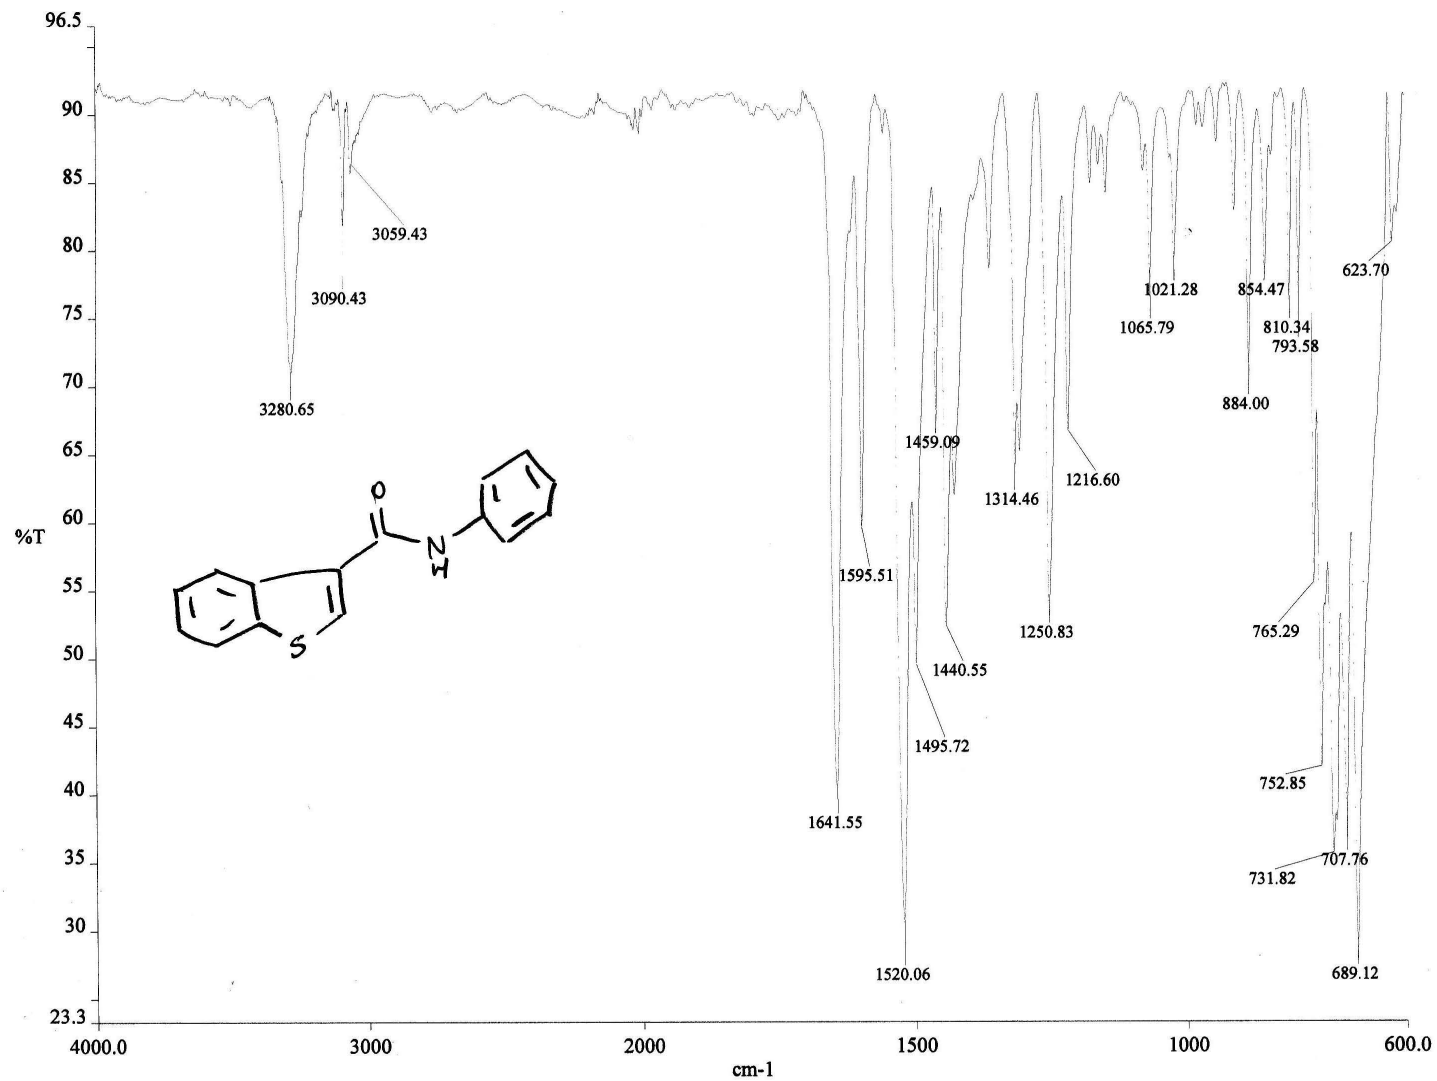

c:\pel\_data\spectra\dyeison\001-da-034-01.sp - 001-DA-034-01

m.p. 179-182



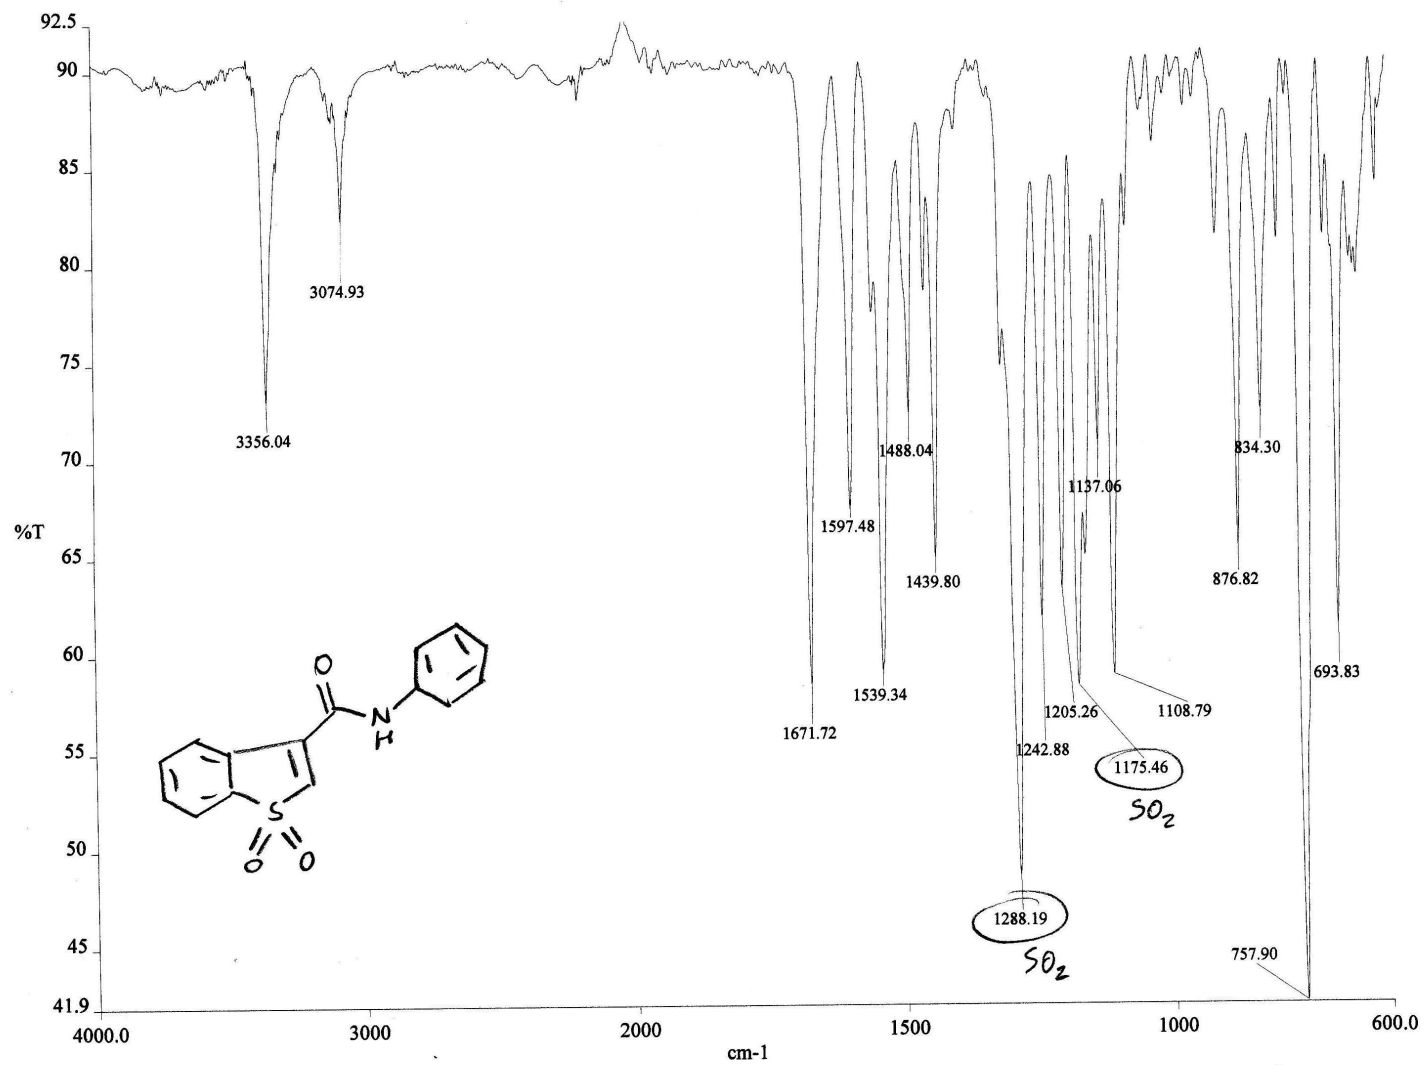

c:\pel\_data\spectra\dyeison\001-da-047-01.sp - 3-CONH + H (H<sub>2</sub>O<sub>2</sub>, 10 Equiv)

mp. 188-190 °C

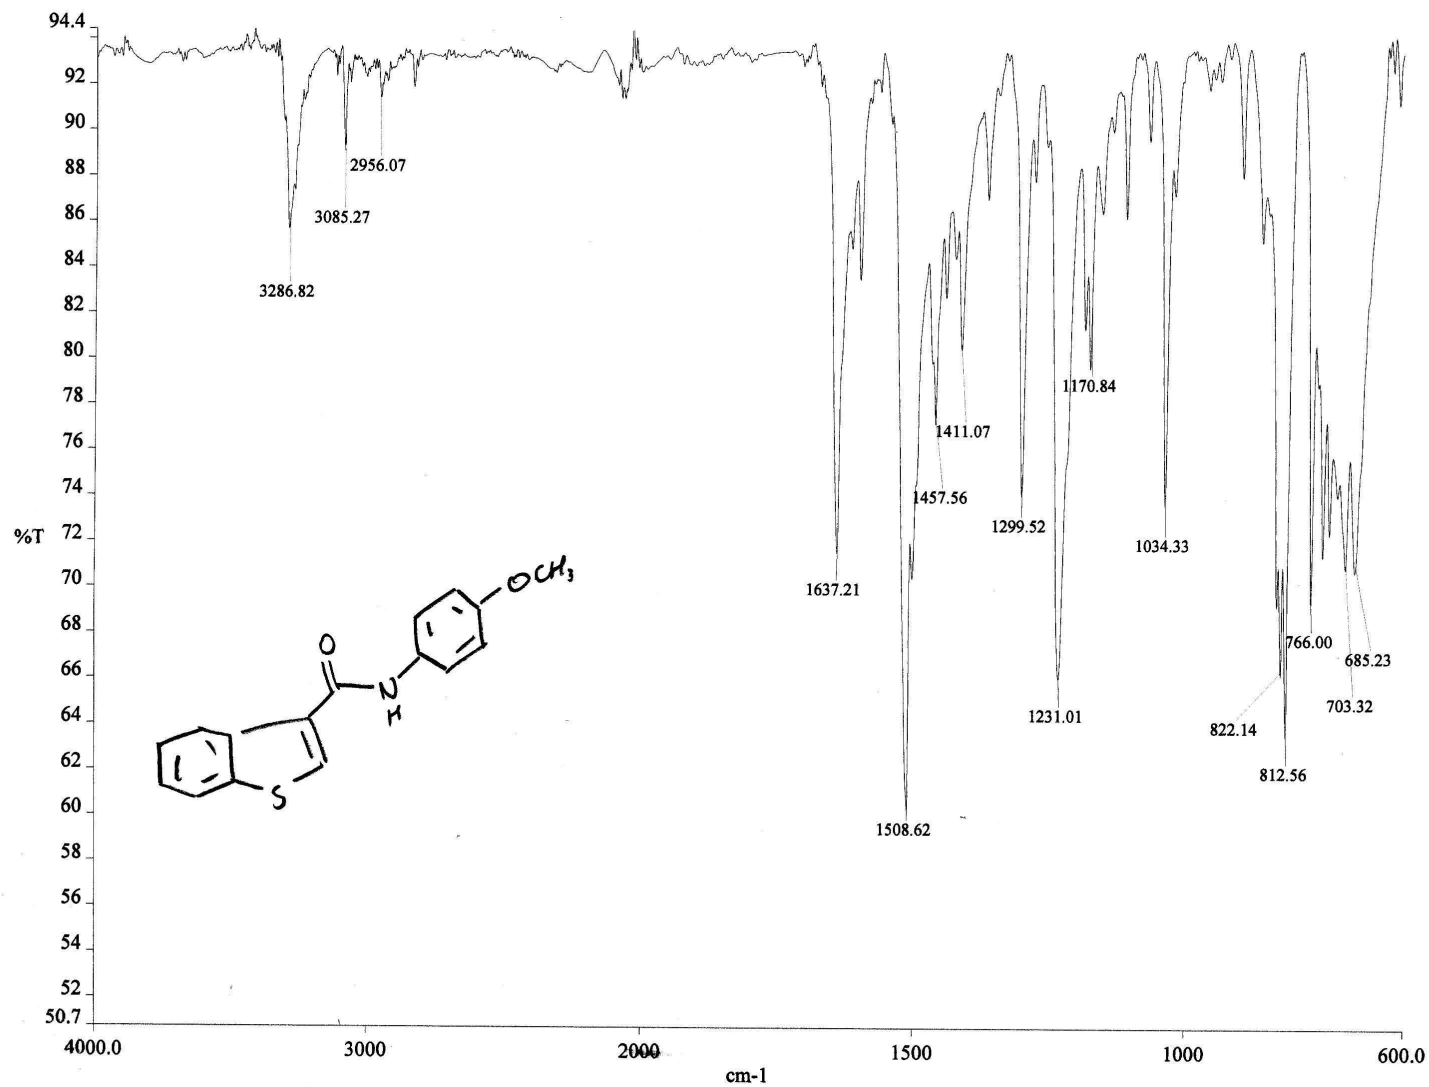

c:\pel\_data\spectra\dyeison\001-da-032-01.sp - 001-DA-032-01

m.p. 225-226

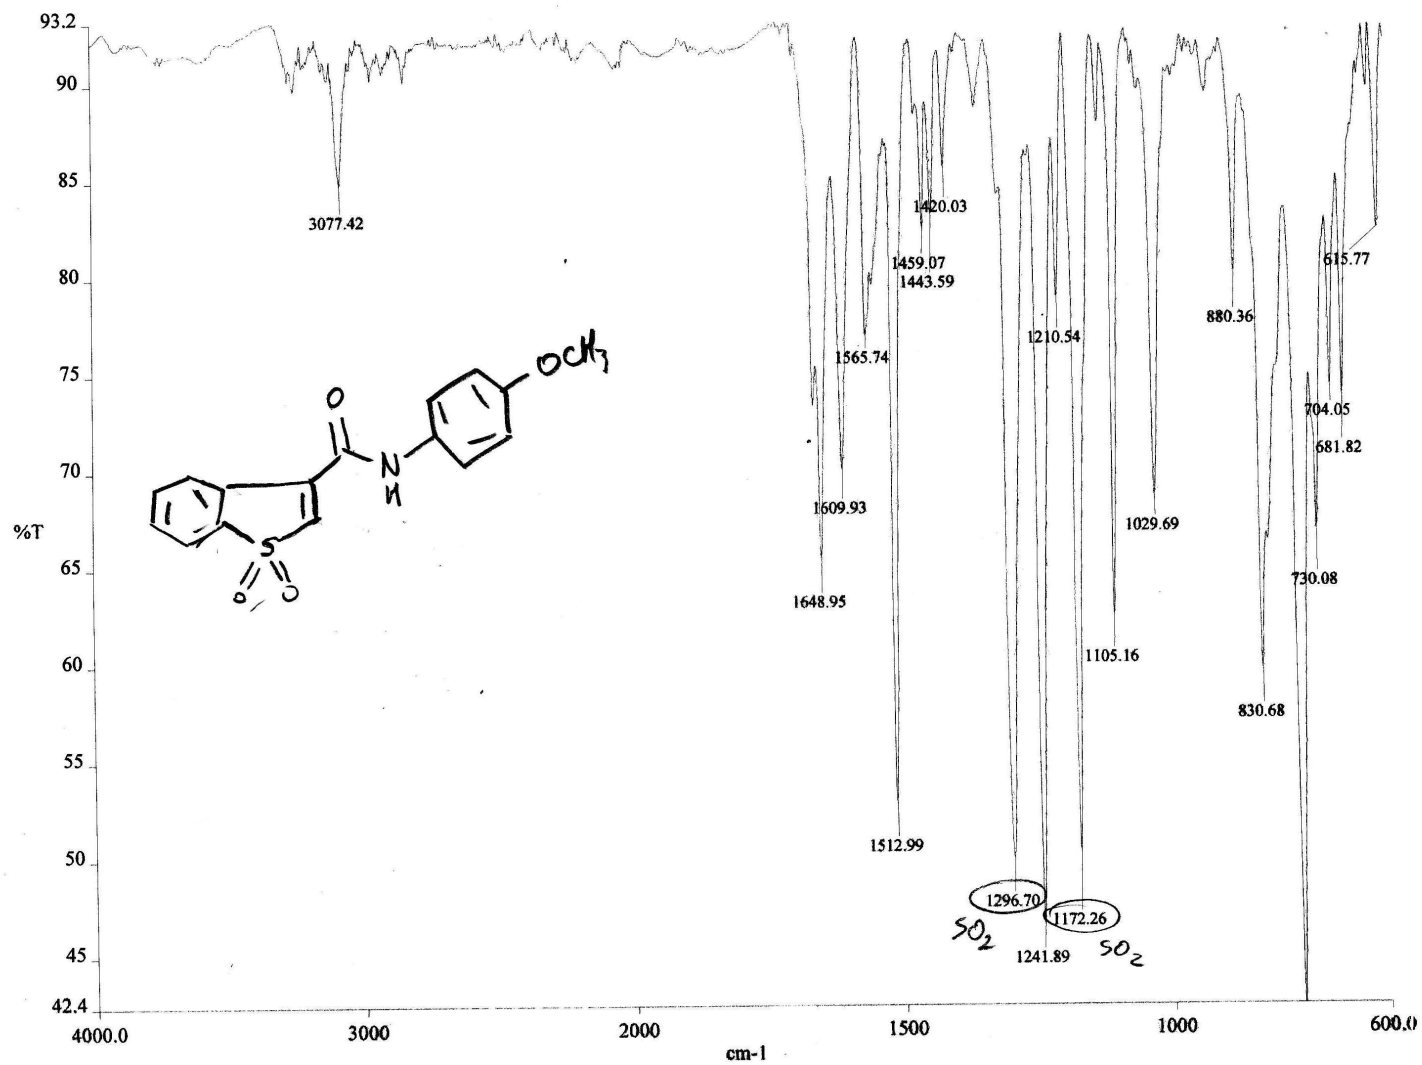

c:\pel\_data\spectra\dyeison\001-da-047-02.sp - 3-CONH + OMe (H2O2, 10 Equiv)

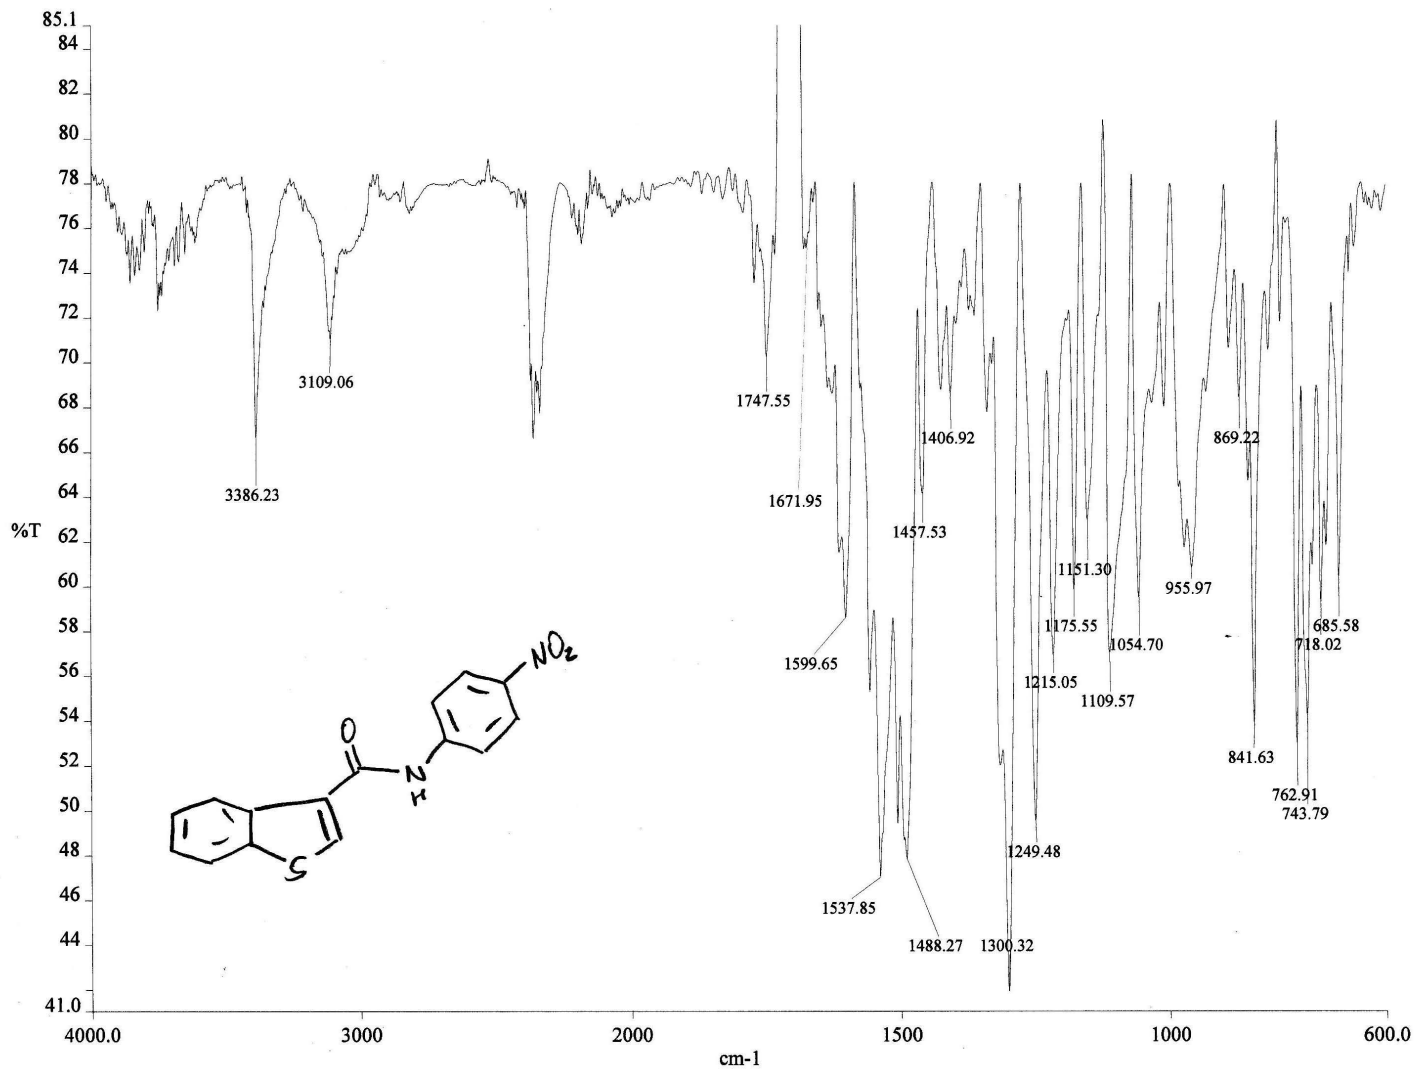

c:\pel\_data\spectra\001-da-056-01.002 - 3-COOH + NO2

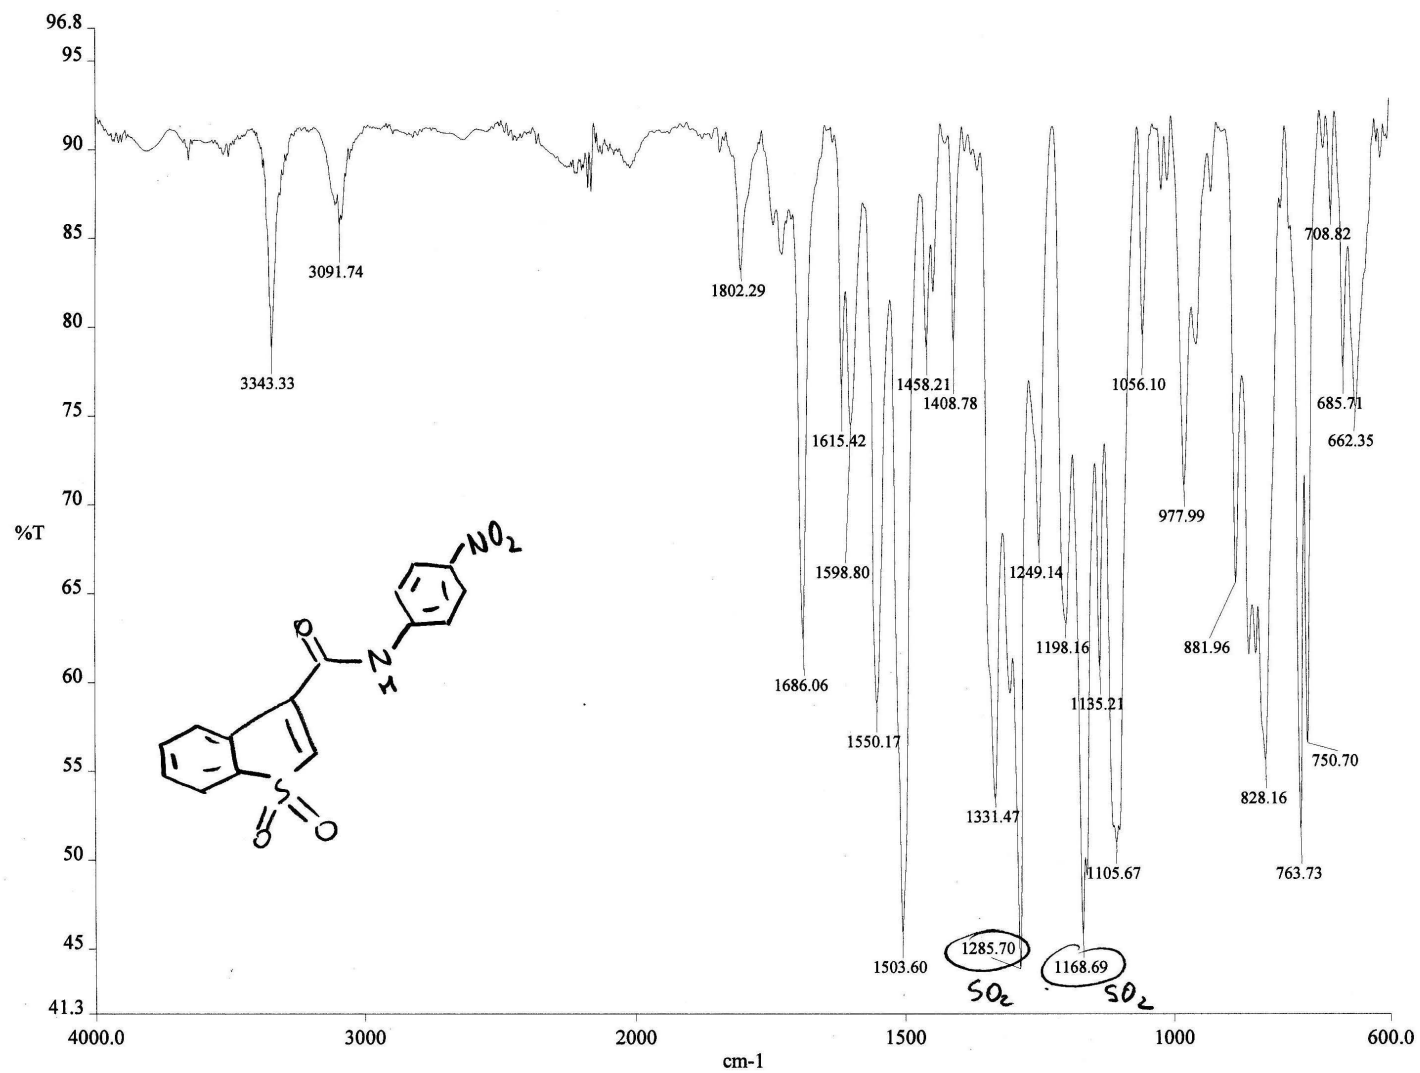

c:\pel\_data\spectra\dyeison\001-da-057-01.sp - 3-COOH + NO2 (H2O2)

~ p. 263 - 264

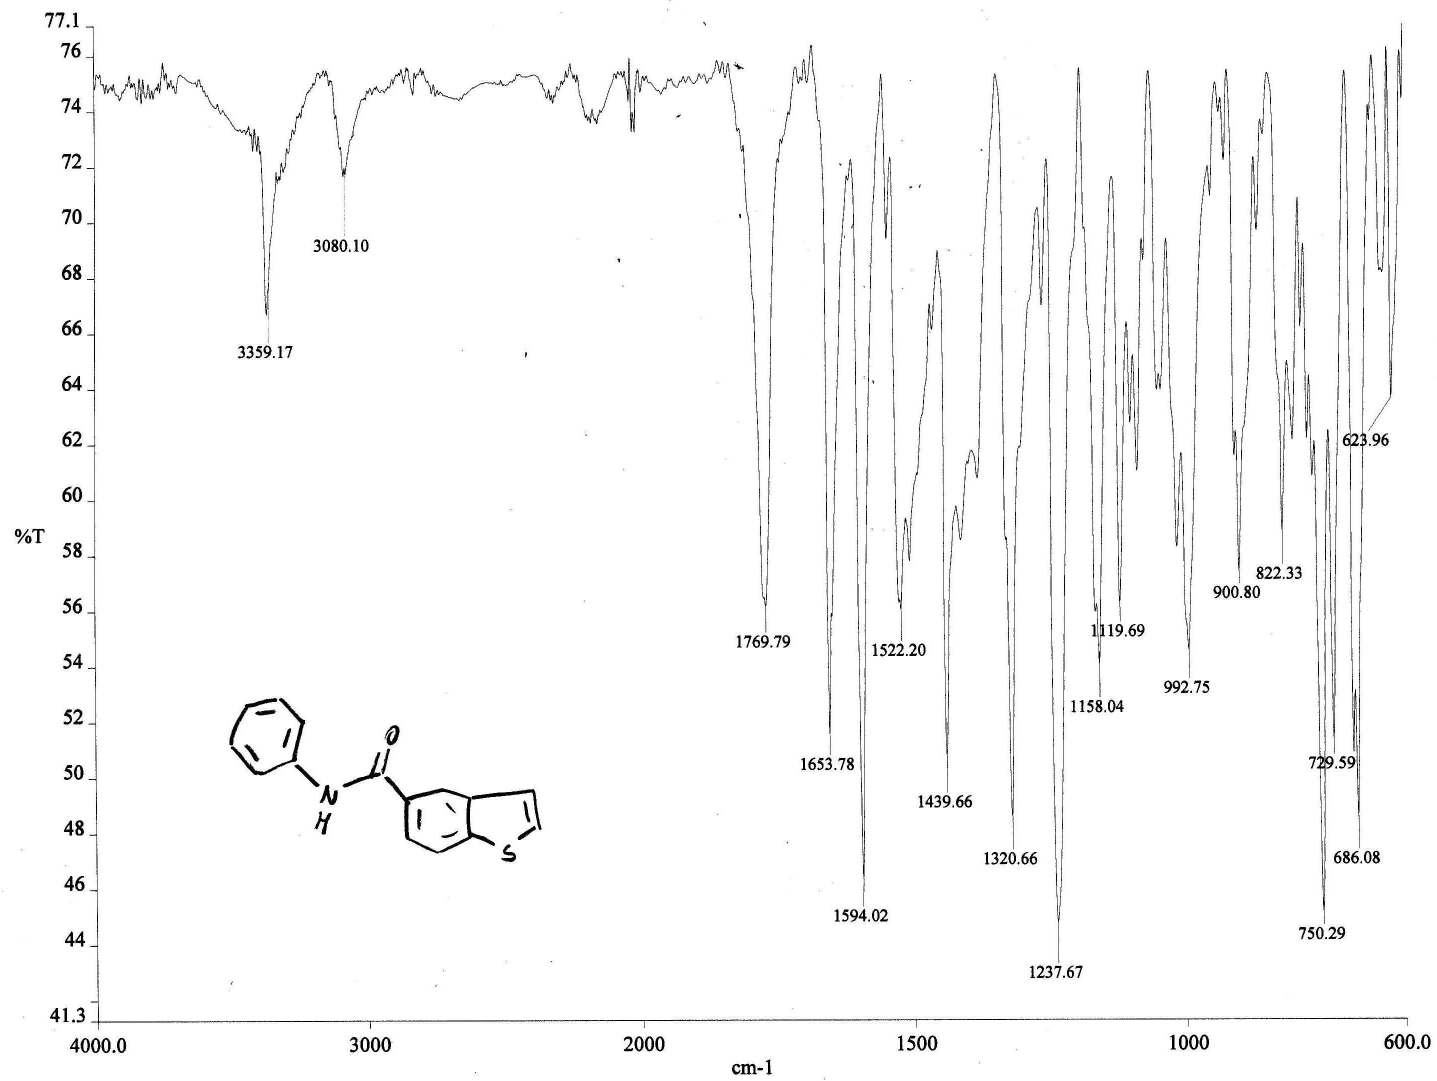

c:\pel\_data\spectra\dyeison\001-da-037-01.sp - 001-DA-037-01

~ 187 - 189

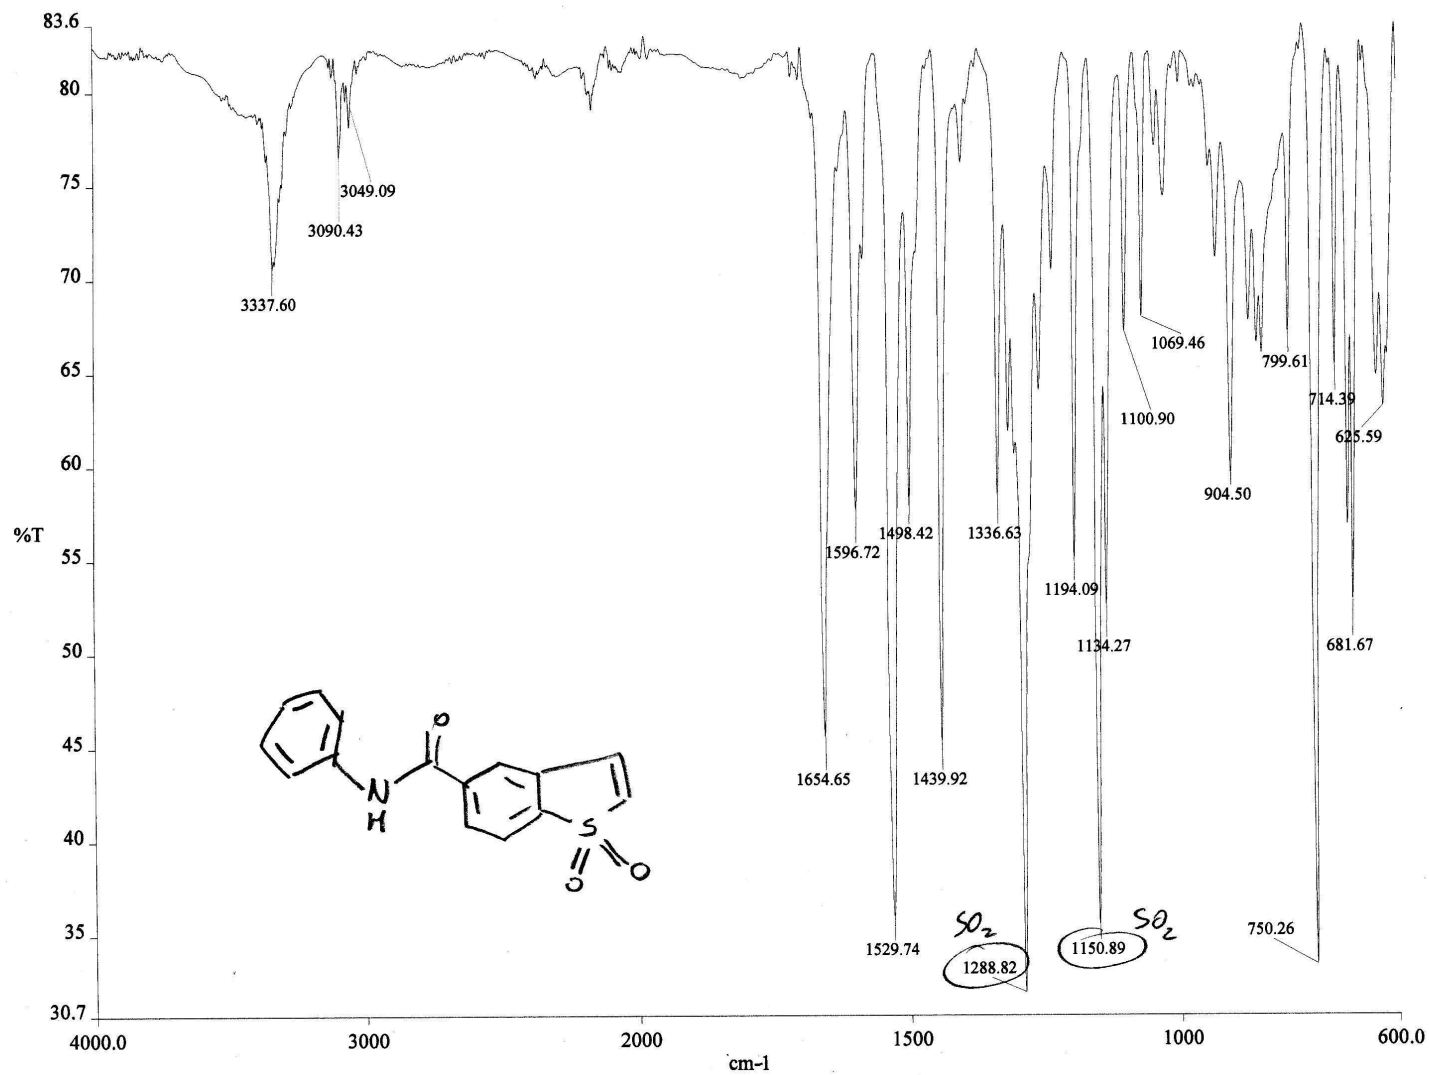

c:\pel\_data\spectra\dyeison\001-da-043-01.sp - 001-DA-043-01 (5-CONH + H, H2O2-oxidation, 10 Equiv)

m.p. 247-249°C

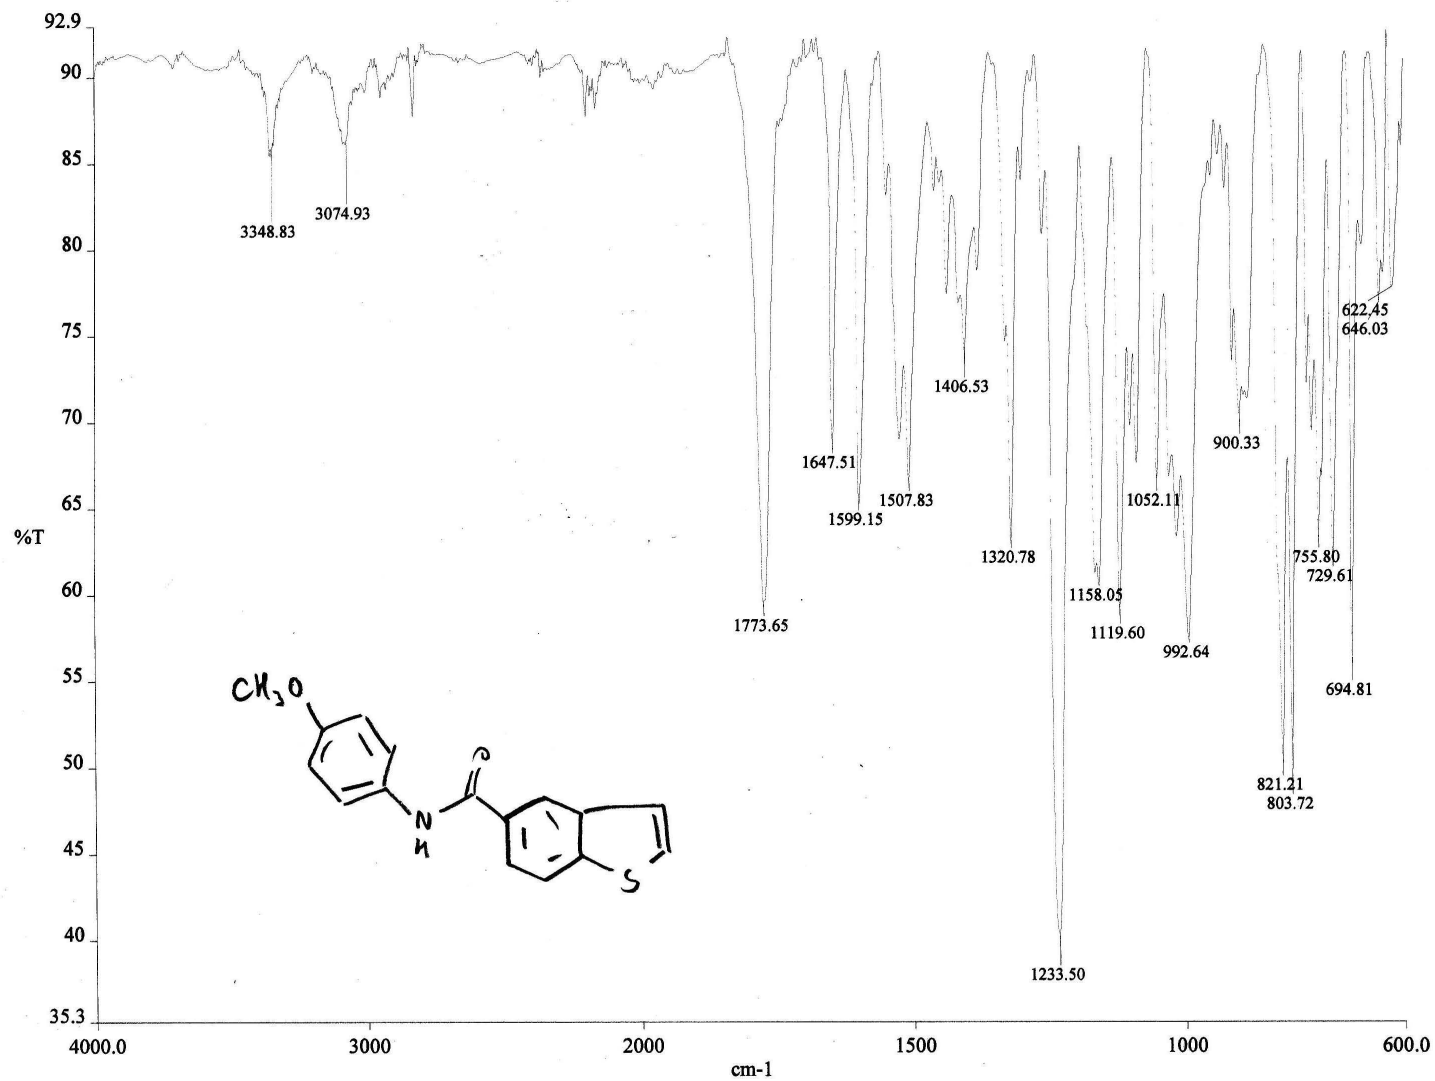

c:\pel\_data\spectra\dyeison\001-da-035-01.sp - 001-DA-035-01

m.p. 211-213



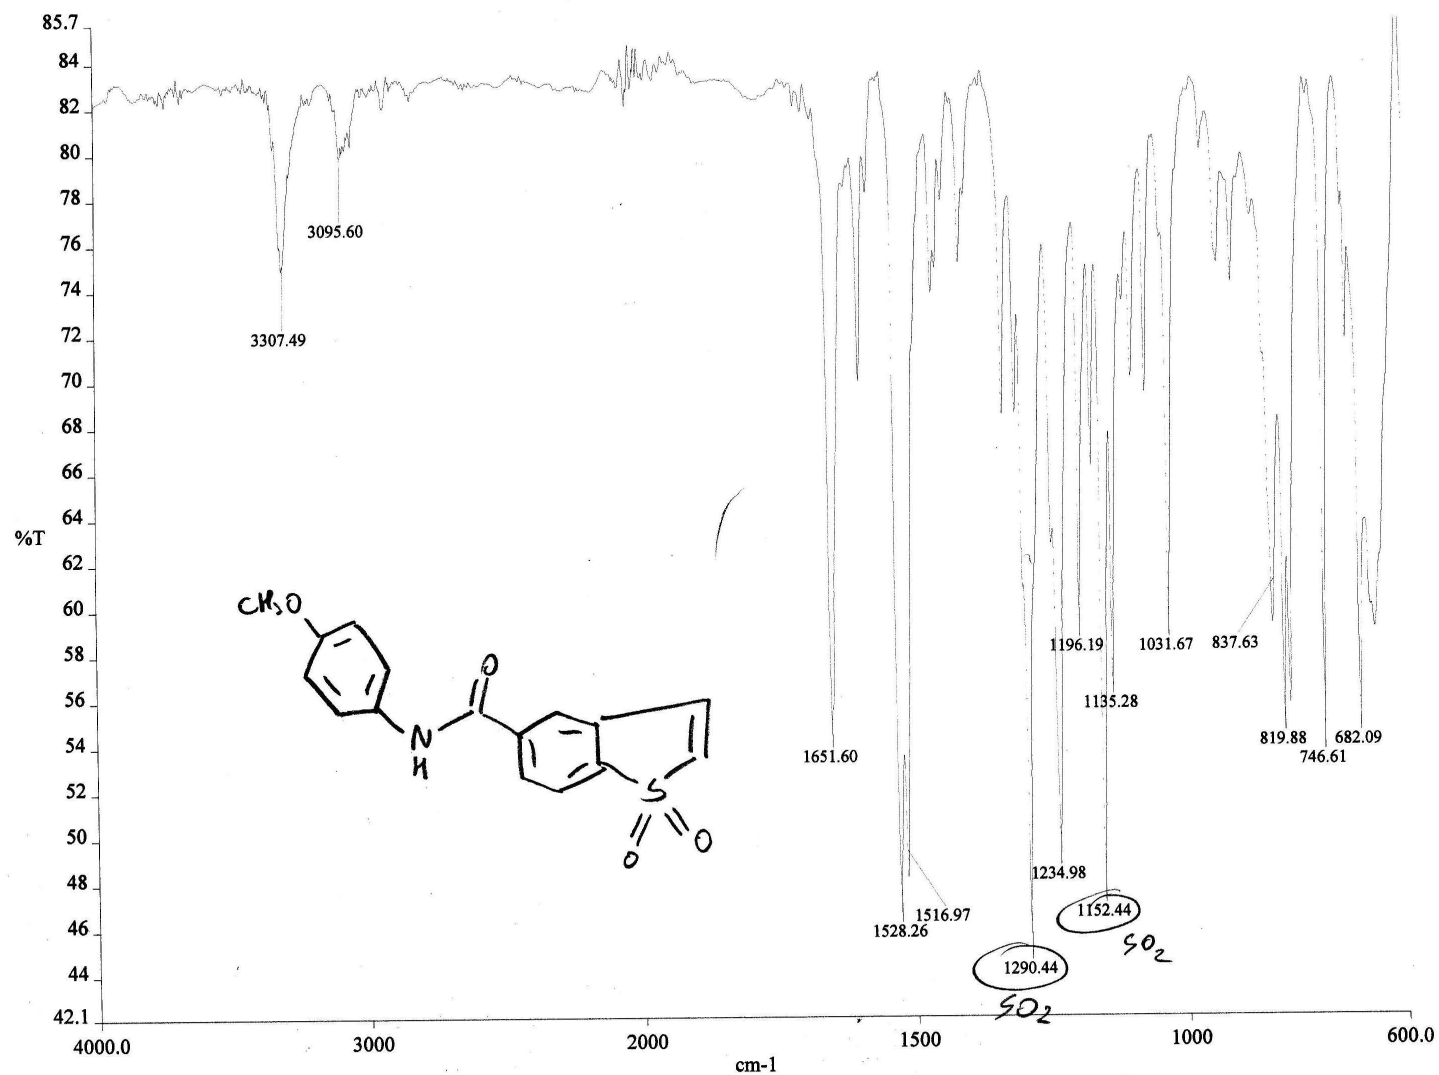

c:\pel\_data\spectra\dyeison\001-da-044-01.sp - 001-DA-044-01 (5-CONH + OMe, H2O2-oxidation, 10 Equiv)

m.p. 251-253

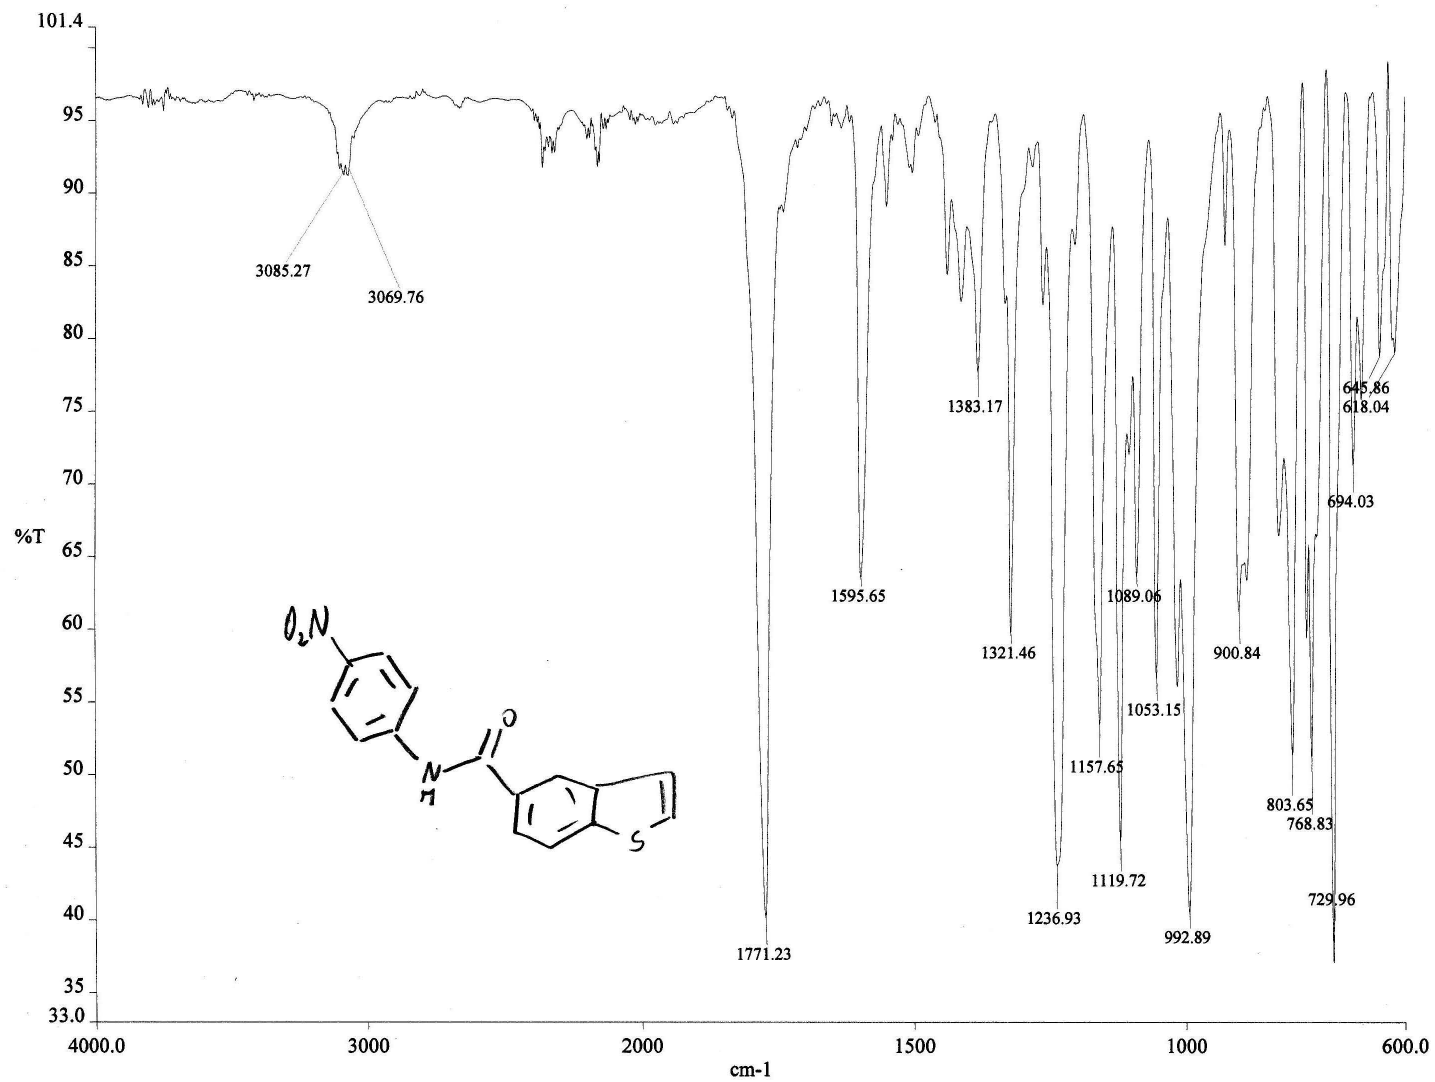

c:\pel\_data\spectra\dyeison\001-da-036-01.sp - 001-DA-036-01

m.p 168 - 170

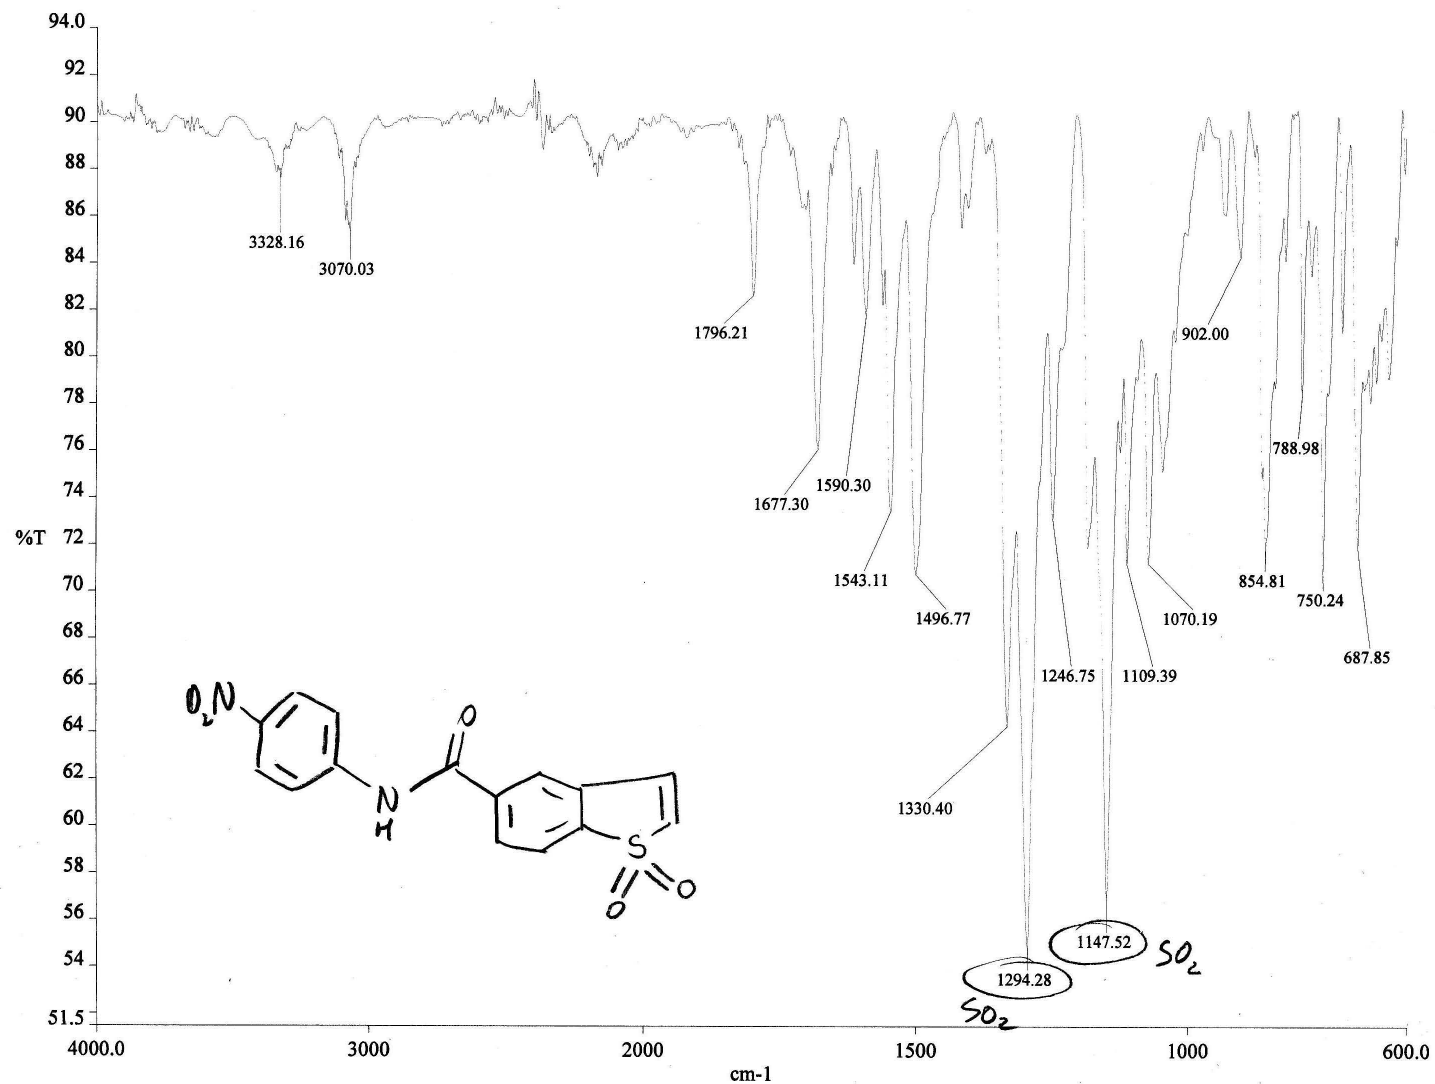

c:\pel\_data\spectra\dyeison\001-da-058-01.sp - 5-COOH + NO2 (dioxirane)

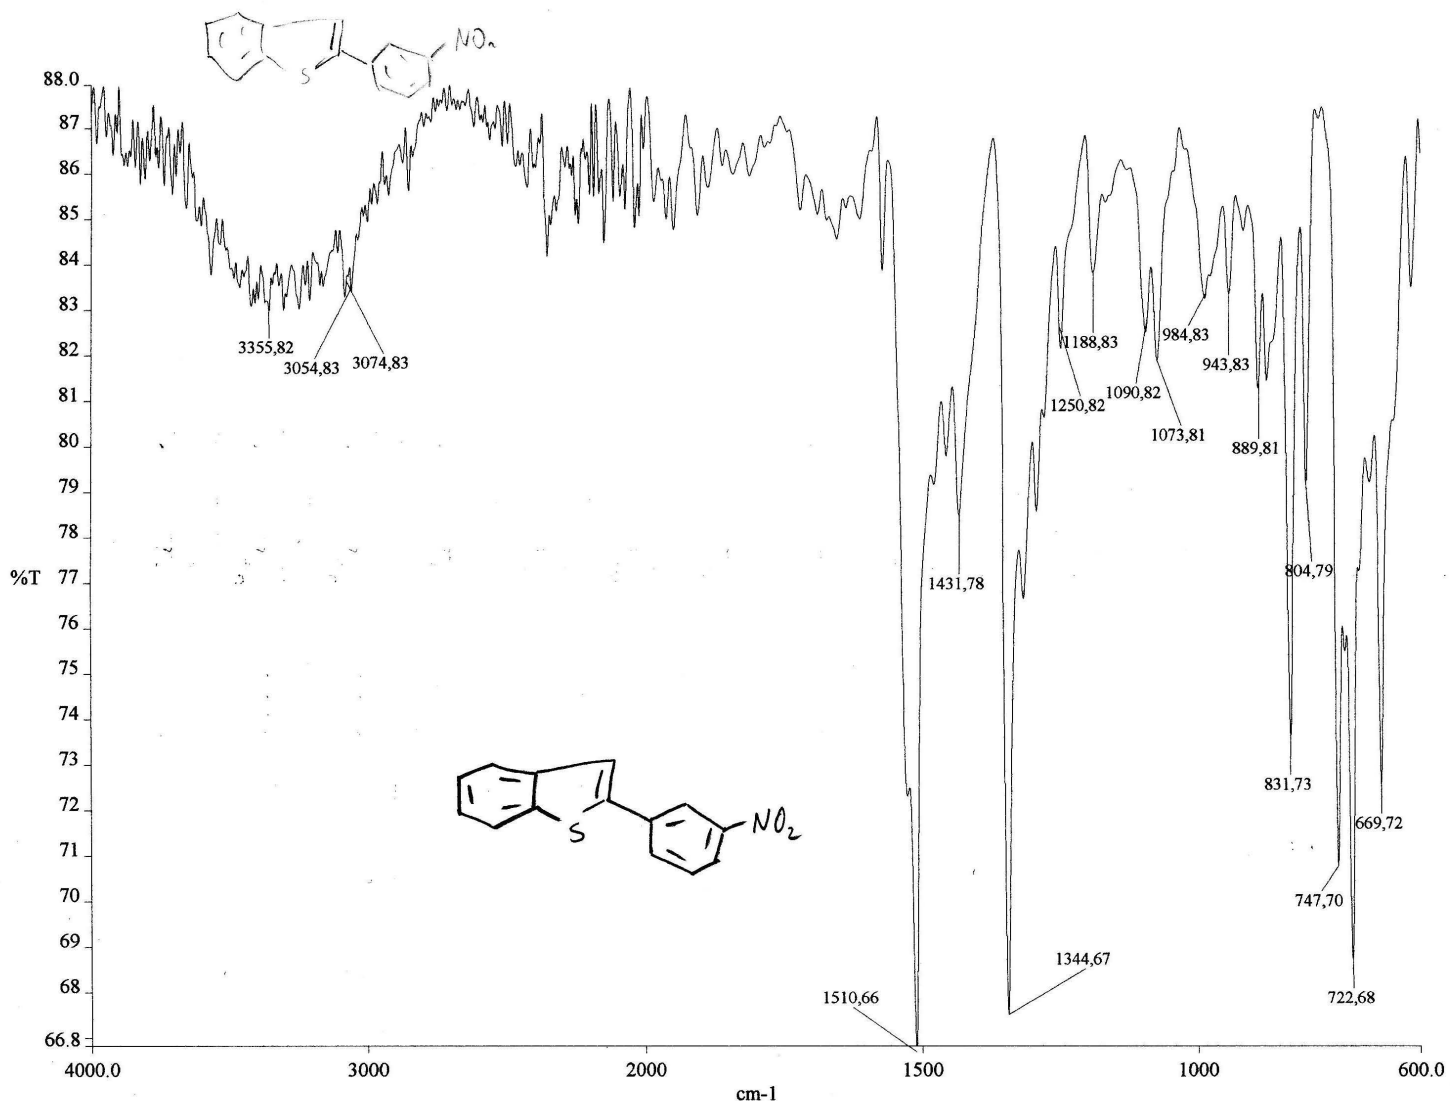

c:\pel\_data\spectra\13da1181.sp - 013-DA-118-01 (Cross-coupling)

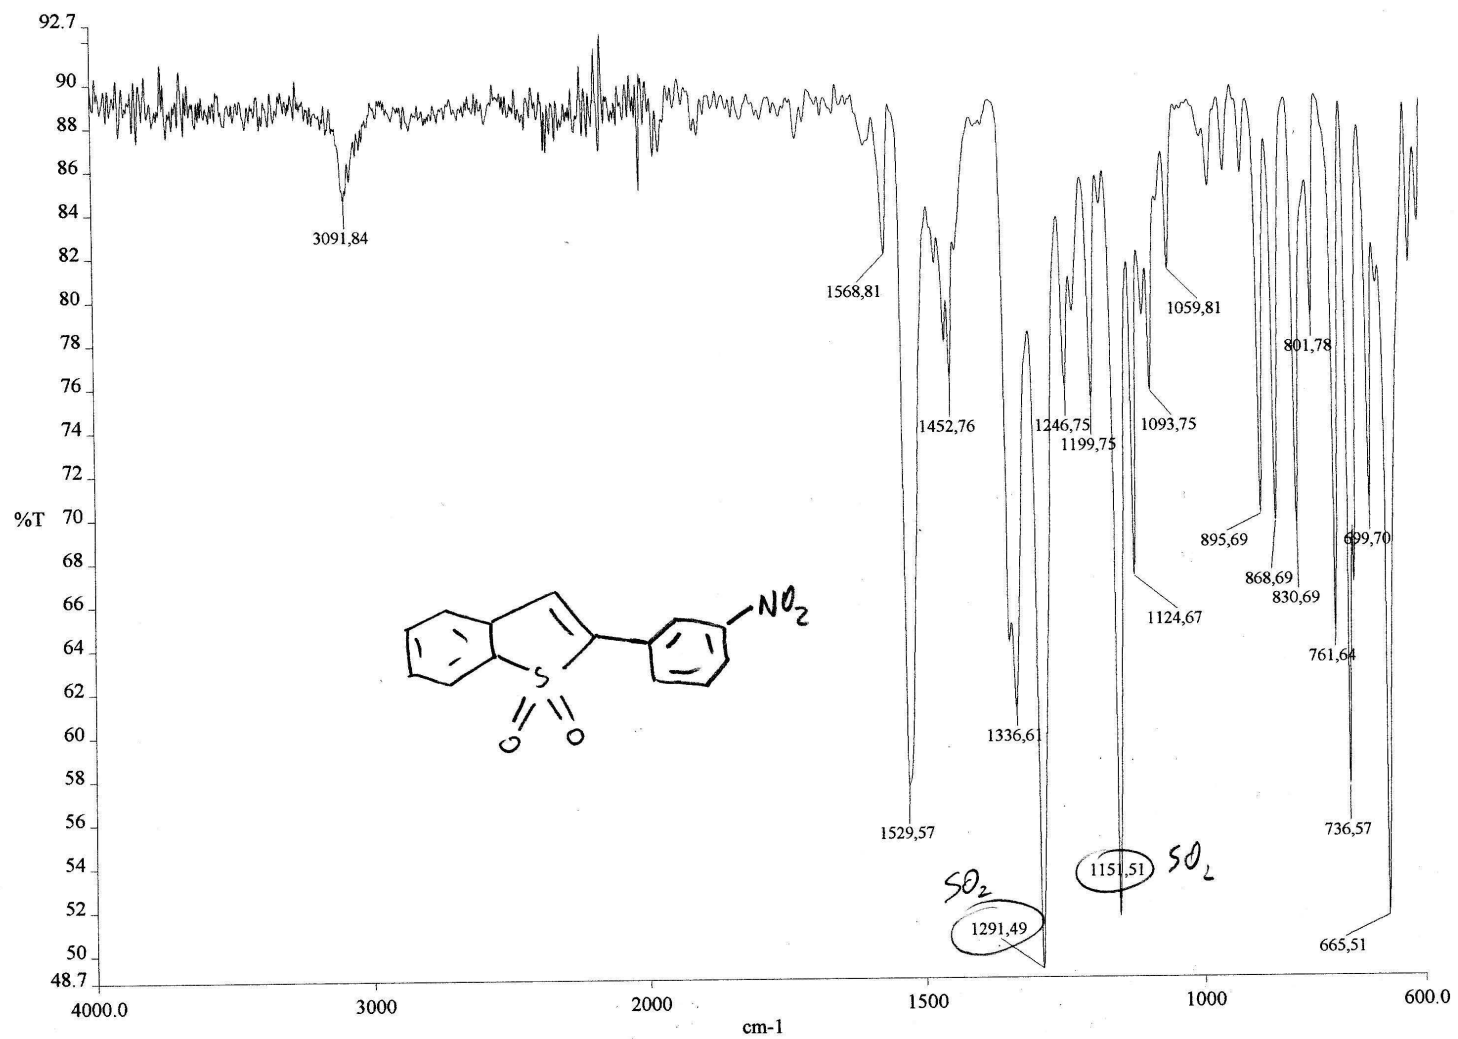

c:\pel\_data\spectra\13da1191.sp - 013-DA-118-01 (Cross-coupling)

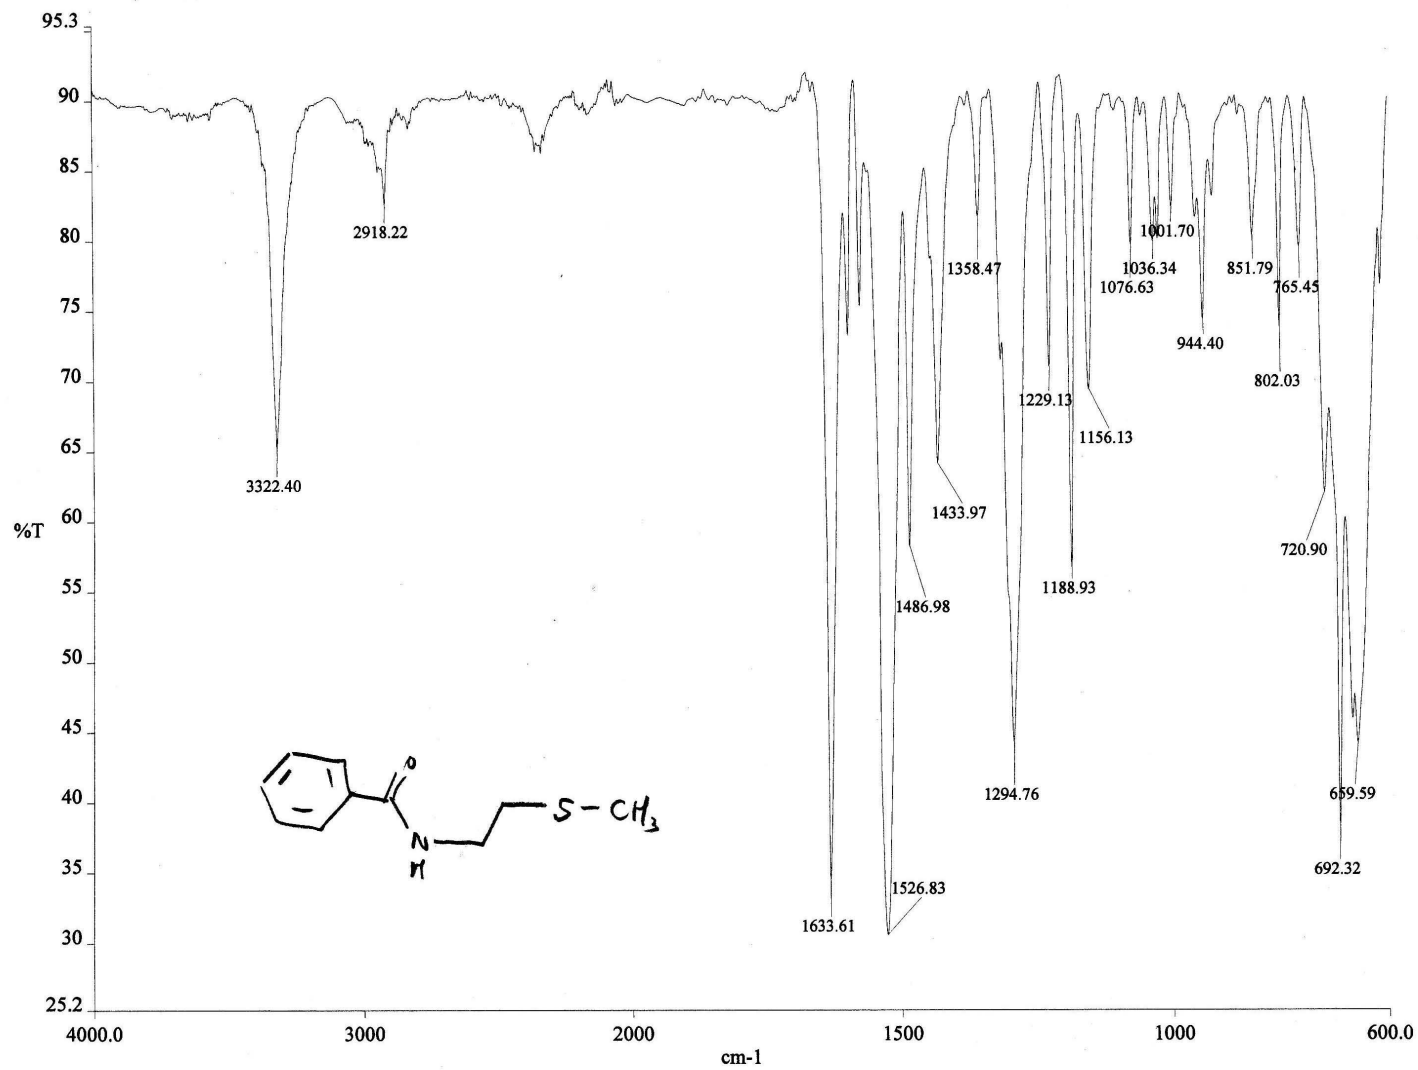

c:\pel\_data\spectra\dyeison\001-da-078-02.sp - 001-DA-078-02

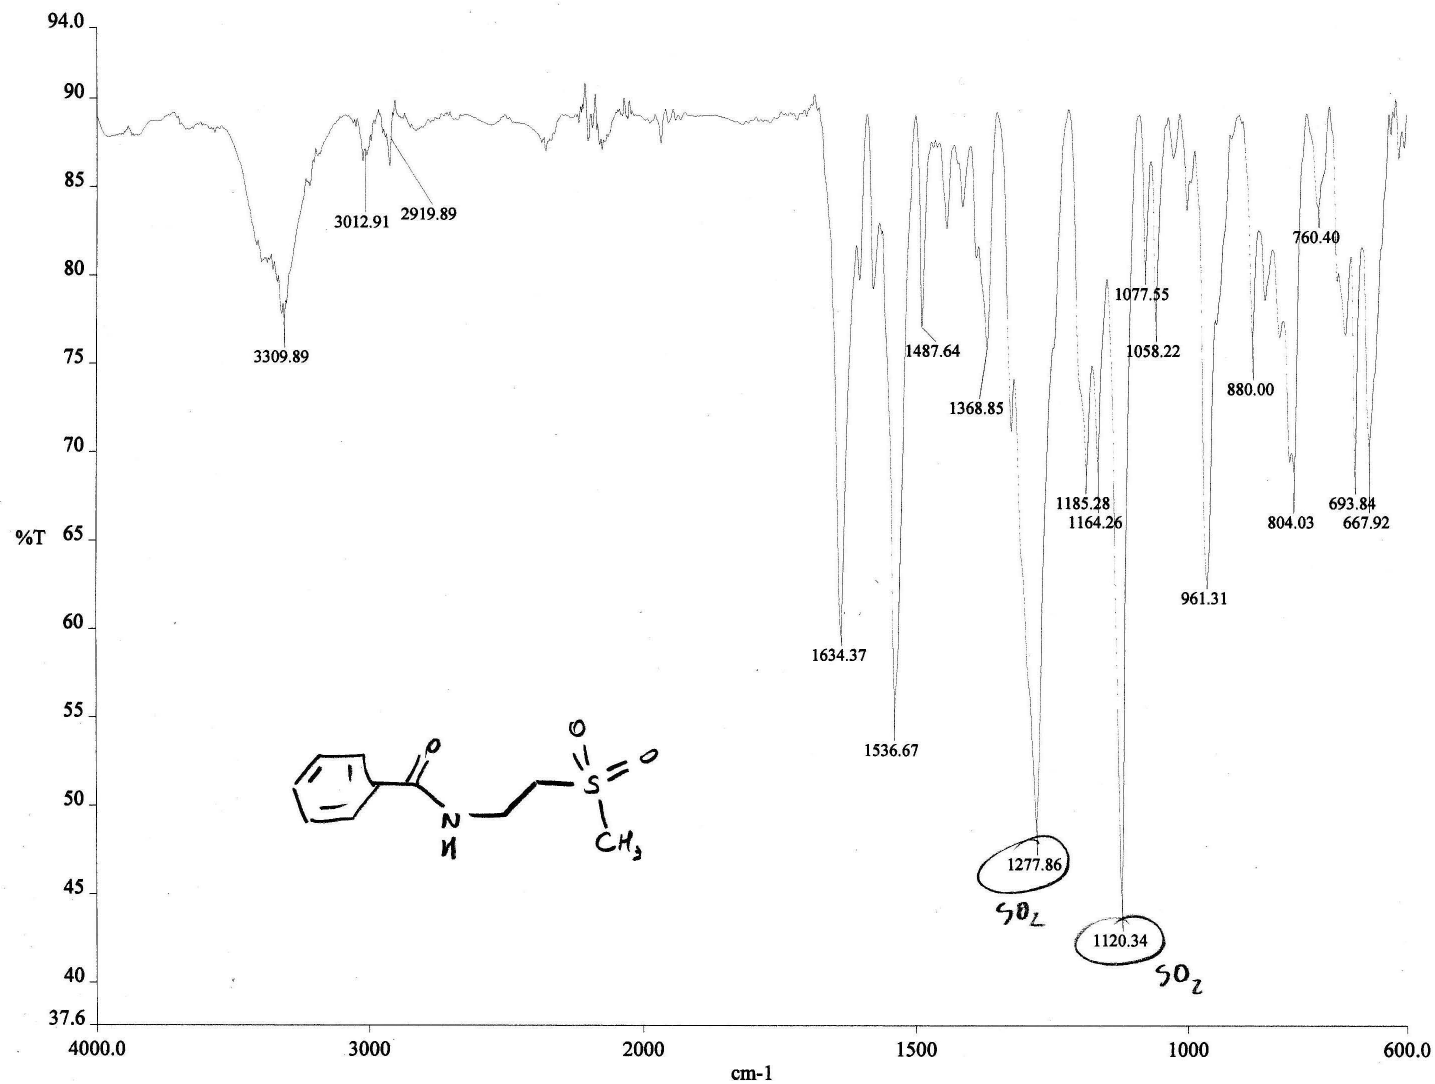

c:\pel\_data\spectra\001-da-079-01.002 - 001-DA-079-01

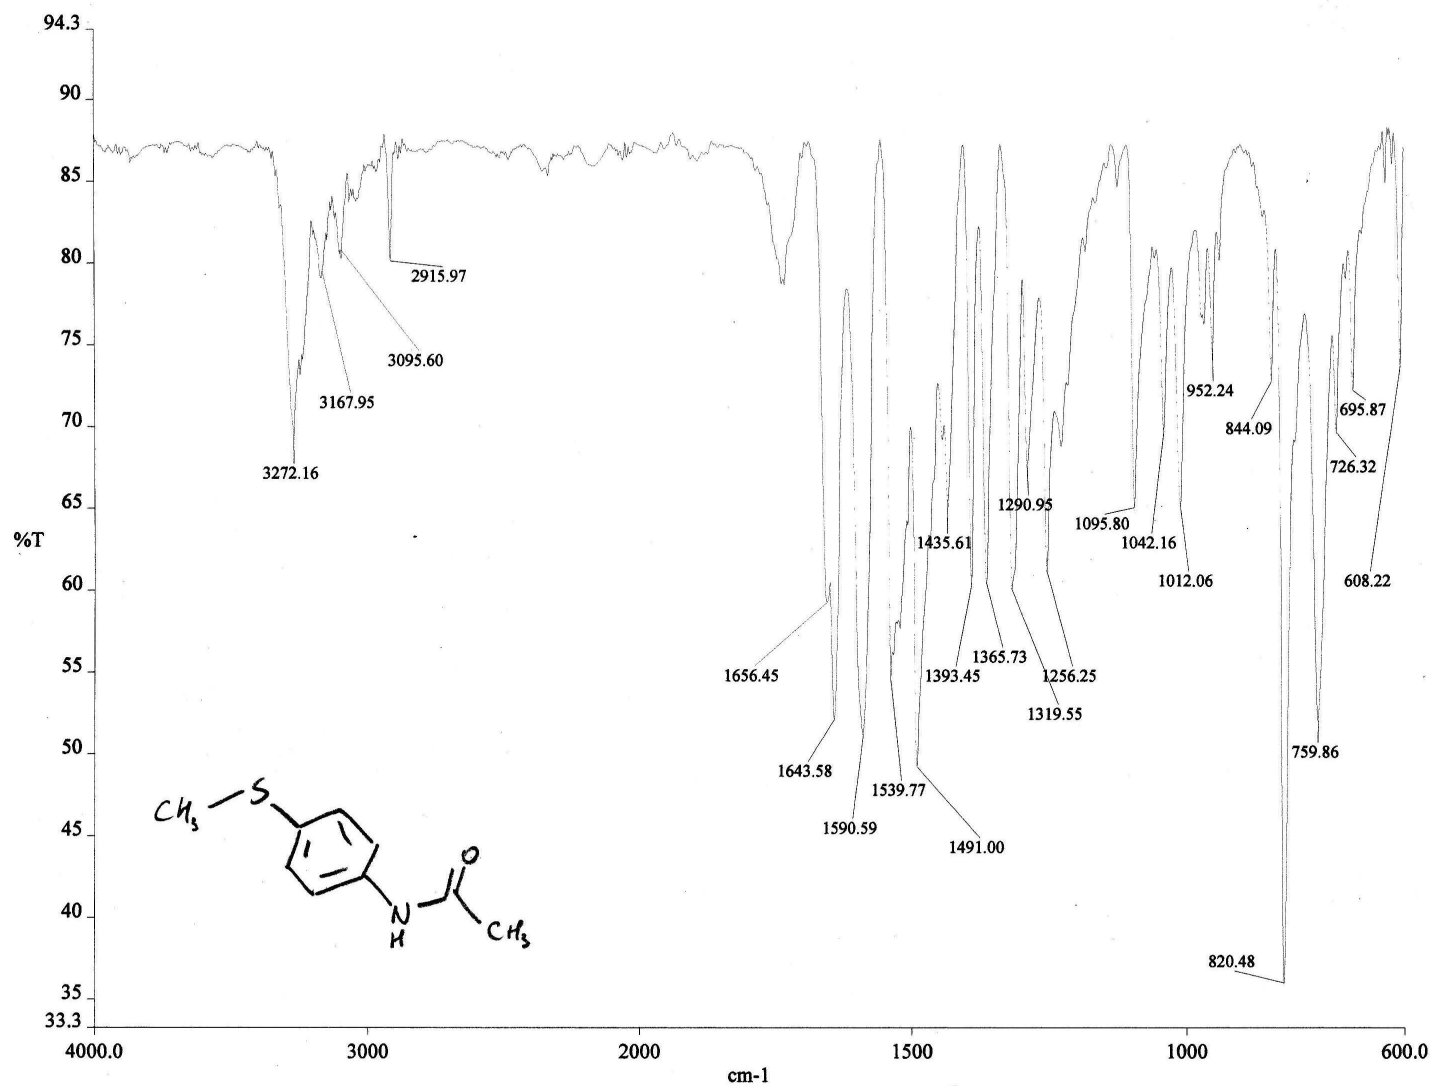

c:\pel\_data\spectra\dyeison\001-da-078-01.sp - 001-DA-078-01



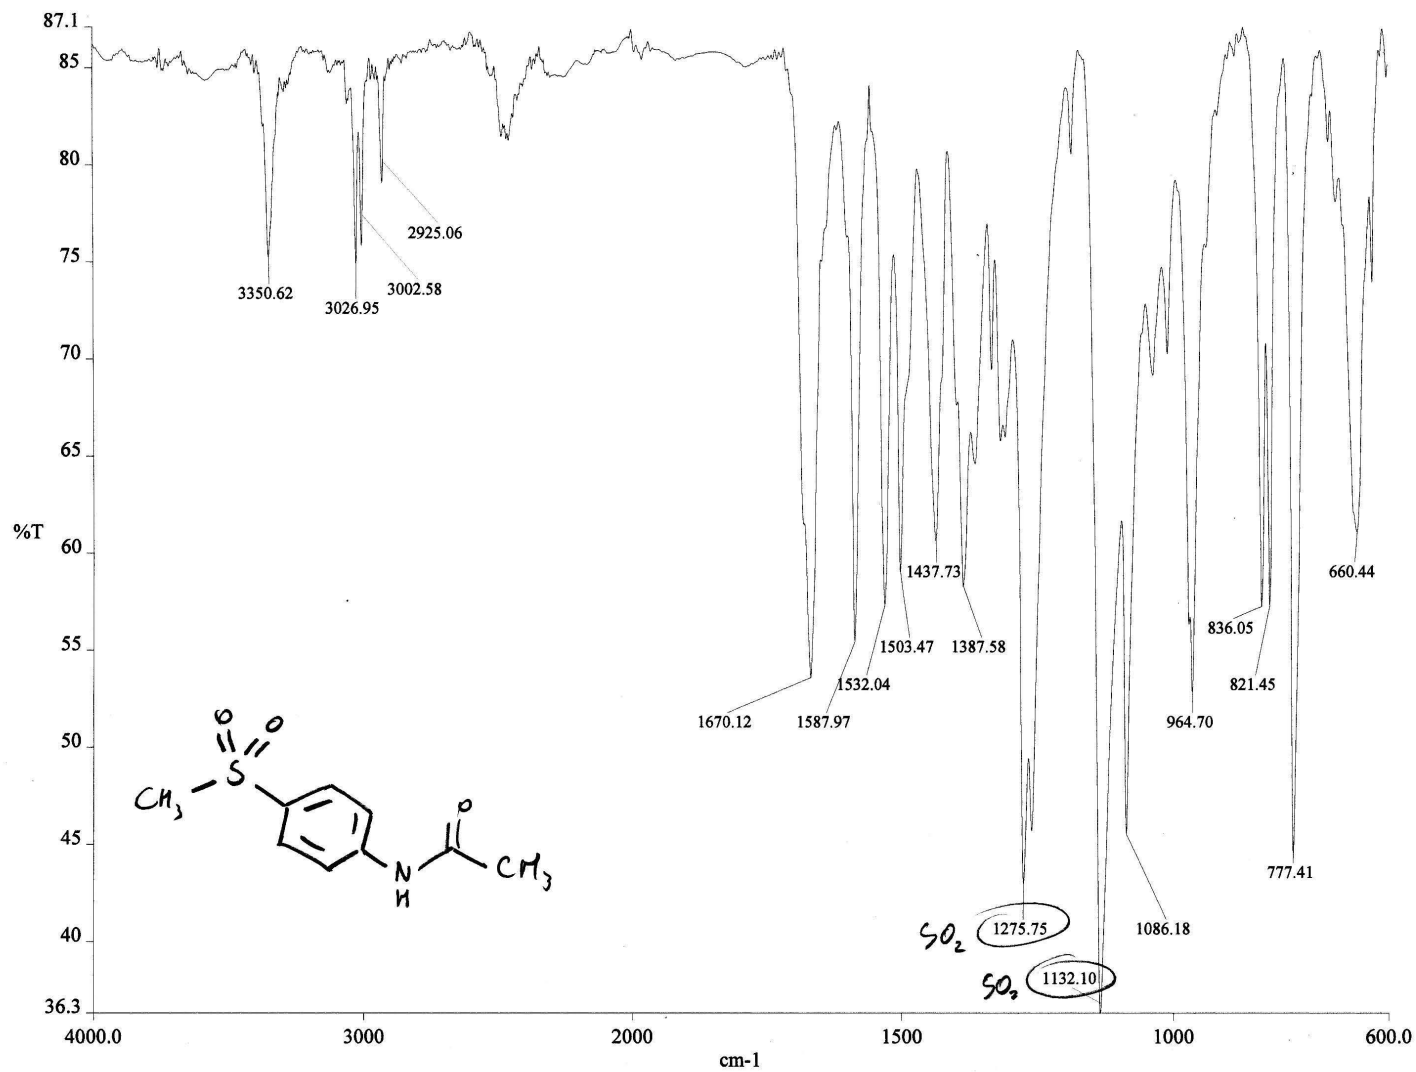

c:\pel\_data\spectra\001-da-083-01.002

m.p. 202-204
